# Supplementary material for: Transcriptomic Analysis of Shiga Toxin-Producing Escherichia coli FORC_035 Reveals the Essential Role of Iron Acquisition for Survival in Canola Sprouts and Water Dropwort
Source: Front Microbiol. 2018 Oct 8;9:2397. doi: 10.3389/fmicb.2018.02397 (PMC6186786; doi:10.3389/fmicb.2018.02397)
Supplement: Supplementary file 2 [file Data_Sheet_1.xlsx]

## Sheet: Transcriptome profile
	Supplementary Table S3. RNA-Sequencing data of FORC_035 in contact with canola sprouts or water dropwort.
	TMM: Trimmed Mean of M-values		Sp/C(1hr): TMMSprout_1hr/TMMControl_1hr		Dr/C(1hr): TMMDropwort_1hr/TMMControl_1hr
	COG: Clusters of Orthlogous Group		Sp/C(3hr): TMMSprout_3hr/TMMControl_3hr		Dr/C(3hr): TMMDropwort_3hr/TMMControl_3hr
	Control indicates FORC_035 cultured without plant materials.
Locus tag	TMM value						Fold change				Log2(Fold change)				p-Value (edgeR)	COG	Product
	Control_1hr	Control_3hr	Dropwort_1hr	Dropwort_3hr	Sprout_1hr	Sprout_3hr	Sp/C(1hr)	Sp/C(3hr)	Dr/C(1hr)	Dr/C(3hr)	Sp/C(1hr)	Sp/C(3hr)	Dr/C(1hr)	Dr/C(3hr)				Control_1hr_1_read	Control_3hr_1_read	Dropwort_1hr_1_read	Dropwort_3hr_1_read	Sprout_1hr_1_read	Sprout_3hr_1_read	feature_index
FORC35_0001	3491.25	6171.6	5792.82	7601.78	3097.01	8544.71	0.887076	1.38452	1.65924	1.23173	-0.17287	0.469386	0.730521	0.300692	0.886	L	chromosomal replication initiation protein	5566	4626	7762	2731	4163	5236	4548
FORC35_0002	2971.27	4976.24	4115.88	6619.2	4308.14	6792.03	1.44993	1.36489	1.38523	1.33016	0.535986	0.448788	0.470121	0.411601	0.657	L	DNA polymerase III subunit beta	4737	3730	5515	2378	5791	4162	4546
FORC35_0003	496.779	828.484	669.436	690.312	624.907	767	1.25792	0.925788	1.34755	0.833223	0.331036	-0.111246	0.430341	-0.263226	0.785	L	recombinase F	792	621	897	248	840	470	4544
FORC35_0004	4044.49	14711.3	9754.21	20461.6	16510.2	6090.31	4.08215	0.41399	2.41173	1.39088	2.02933	-1.27233	1.27007	0.476	0.104	L	DNA gyrase subunit B	6448	11027	13070	7351	22193	3732	4542
FORC35_0005	924.562	1008.59	1565.75	2115.47	1144.92	4363.74	1.23834	4.32658	1.6935	2.09746	0.308404	2.11323	0.760012	1.06864	0.799	S	hypothetical protein	1474	756	2098	760	1539	2674	4540
FORC35_0006	1024.29	1455.52	1614.26	467.63	1965.48	587.49	1.91886	0.40363	1.57597	0.321281	0.940253	-1.3089	0.656242	-1.63809	0.439	R	sugar phosphate phosphatase	1633	1091	2163	168	2642	360	4538
FORC35_0007	259.053	301.509	238.818	86.289	219.461	230.1	0.847168	0.763161	0.921888	0.28619	-0.23928	-0.389941	-0.117336	-1.80495	0.846		hypothetical protein	413	226	320	31	295	141	4536
FORC35_0008	267.207	369.549	305.985	520.517	400.982	331.279	1.50064	0.896441	1.14512	1.40852	0.585579	-0.15772	0.195504	0.49418	0.63	K	galactonate operon transcriptional repressor	426	277	410	187	539	203	4534
FORC35_0009	164.339	310.848	184.338	356.29	281.208	295.377	1.71115	0.950228	1.12169	1.14619	0.774967	-0.0736537	0.165678	0.196841	0.527	G	2-oxo-3-deoxygalactonate kinase	262	233	247	128	378	181	4532
FORC35_0010	76.5241	150.755	77.6158	114.124	110.103	141.977	1.4388	0.941773	1.01427	0.757019	0.524864	-0.0865488	0.0204362	-0.401599	0.674	G	2-dehydro-3-deoxy-6-phosphogalactonate aldolase	122	113	104	41	148	87	4530
FORC35_0011	89.069	169.432	102.244	128.042	115.31	190.934	1.29462	1.12691	1.14792	0.755711	0.372525	0.172367	0.199019	-0.404094	0.762	M	2-oxo-3-deoxygalactonate 6-phosphate aldolase and galactonate dehydratase	142	127	137	46	155	117	4528
FORC35_0012	119.804	153.423	132.096	77.9384	115.31	159.928	0.96249	1.0424	1.1026	0.507997	-0.0551571	0.059906	0.140911	-0.977108	0.972	G	D-galactonate transporter	191	115	177	28	155	98	4526
FORC35_0013	94.087	125.406	137.32	169.794	143.58	212.149	1.52603	1.69169	1.4595	1.35395	0.609785	0.758466	0.545477	0.437177	0.624	C	oxidoreductase	150	94	184	61	193	130	4524
FORC35_0014	560.131	985.909	814.966	631.858	801.964	419.402	1.43174	0.425397	1.45495	0.640889	0.517772	-1.23312	0.540974	-0.641854	0.669	U	hypothetical protein	893	739	1092	227	1078	257	4522
FORC35_0015	296.06	285.5	332.852	308.97	330.308	438.985	1.11568	1.5376	1.12427	1.08221	0.15792	0.620682	0.168991	0.113976	0.896	R	hypothetical protein	472	214	446	111	444	269	4520
FORC35_0016	415.237	1957.14	441.813	3134.24	1339.83	2025.21	3.22666	1.03478	1.064	1.60144	1.69004	0.0493207	0.0894995	0.679366	0.172	O	heat shock protein IbpA	662	1467	592	1126	1801	1241	4518
FORC35_0017	141.131	369.549	100.751	565.053	134.653	394.924	0.9541	1.06866	0.713888	1.52903	-0.0677877	0.0958075	-0.486231	0.612621	0.958	O	heat shock chaperone IbpB	225	277	135	203	181	242	4516
FORC35_0018	452.872	837.822	991.094	1703.51	1199.97	1041.16	2.64969	1.2427	2.18846	2.03326	1.40582	0.313478	1.12992	1.02379	0.252	P	aspT/YidE/YbjL antiporter duplication domain protein	722	628	1328	612	1613	638	4514
FORC35_0019	34.4986	33.3528	49.2562	52.8868	49.8438	45.6936	1.44481	1.37001	1.42777	1.58568	0.530876	0.454184	0.513768	0.6651	0.673	K	GntR family transcriptional regulator	55	25	66	19	67	28	4512
FORC35_0020	45.1618	56.0327	94.0345	91.856	47.612	107.706	1.05425	1.92221	2.08217	1.63933	0.0762222	0.942763	1.05809	0.713105	0.959	G	PTS alpha-glucoside transporter subunit IIBC	72	42	126	33	64	66	4510
FORC35_0022	466.671	224.131	174.636	153.093	225.413	164.823	0.483023	0.73539	0.374215	0.683053	-1.04984	-0.443419	-1.41806	-0.54993	0.391	K	AraC family transcriptional regulator	744	168	234	55	303	101	4506
FORC35_0023	72.7606	88.0514	109.707	125.258	92.2482	137.081	1.26783	1.55683	1.50778	1.42256	0.342363	0.63861	0.592425	0.508487	0.783	R	solute	116	66	147	45	124	84	4504
FORC35_0024	471.69	552.322	661.973	612.373	373.456	1333.28	0.791742	2.41394	1.40341	1.10872	-0.336898	1.27139	0.488935	0.148901	0.782	P	hypothetical protein	752	414	887	220	502	817	4502
FORC35_0025	108.514	164.096	193.293	122.475	144.324	177.879	1.33001	1.08399	1.78128	0.74636	0.411432	0.116356	0.832914	-0.422056	0.742		membrane protein	173	123	259	44	194	109	4500
FORC35_0026	174.375	185.442	211.951	211.547	167.386	233.364	0.959921	1.25842	1.21549	1.14077	-0.0590128	0.331616	0.28154	0.190014	0.966	S	inner membrane protein yidH	278	139	284	76	225	143	4498
FORC35_0027	114.159	162.762	143.291	114.124	101.919	135.449	0.892785	0.832192	1.25519	0.701173	-0.163615	-0.265012	0.327902	-0.512158	0.898		membrane protein	182	122	192	41	137	83	4496
FORC35_0029	38.8893	30.6846	66.4212	41.7527	45.3802	62.0128	1.16691	2.02097	1.70796	1.36071	0.22269	1.01505	0.772271	0.444355	0.879	G	multidrug resistance protein D	62	23	89	15	61	38	4492
FORC35_0030	666.763	424.248	447.037	528.868	517.036	334.543	0.775442	0.788555	0.670459	1.2466	-0.366909	-0.342716	-0.57678	0.318	0.762		hypothetical protein	1063	318	599	190	695	205	4490
FORC35_0033	5419.41	3912.95	2991.19	19673.9	5729.06	64331.7	1.05714	16.4407	0.551941	5.02789	0.0801618	4.0392	-0.857415	2.32995	0.947	E	acetolactate synthase	8640	2933	4008	7068	7701	39421	4488
FORC35_0034	729.488	679.063	473.904	1706.29	1141.2	8858.04	1.56438	13.0445	0.649639	2.51272	0.645595	3.70537	-0.622289	1.32925	0.594	E	acetolactate synthase	1163	509	635	613	1534	5428	4486
FORC35_0035	90.3235	116.068	129.111	69.5879	99.6875	168.087	1.10367	1.44818	1.42943	0.599545	0.142311	0.534243	0.515438	-0.738059	0.912	T	transcriptional regulator	144	87	173	25	134	103	4484
FORC35_0036	119.177	184.107	129.111	100.207	198.631	101.179	1.66669	0.549564	1.08336	0.544283	0.736987	-0.863641	0.115506	-0.877572	0.546	T	sensory histidine kinase	190	138	173	36	267	62	4482
FORC35_0037	43.9073	89.3855	64.1823	55.6703	125.725	48.9575	2.86343	0.547712	1.46177	0.622811	1.51774	-0.868511	0.547715	-0.683133	0.226	G	regulatory protein	70	67	86	20	169	30	4480
FORC35_0038	60.8429	113.4	108.961	75.1549	95.2239	625.024	1.56508	5.5117	1.79085	0.662745	0.646235	2.4625	0.840646	-0.593475	0.607	G	antiporter	97	85	146	27	128	383	4478
FORC35_0039	476.707	345.535	298.522	960.312	466.448	832.277	0.978479	2.40866	0.626217	2.7792	-0.0313868	1.26823	-0.675266	1.47467	0.981	F	adenine deaminase	760	259	400	345	627	510	4476
FORC35_0040	107.259	69.3738	96.2734	83.5054	64.7225	176.247	0.603421	2.54054	0.897577	1.2037	-0.728762	1.34514	-0.155892	0.267479	0.561	R	adenine permease	171	52	129	30	87	108	4474
FORC35_0041	153.675	186.776	214.936	105.774	257.402	104.443	1.67497	0.559187	1.39864	0.566313	0.744138	-0.838596	0.484021	-0.820327	0.543		hypothetical protein	245	140	288	38	346	64	4472
FORC35_0042	349.376	216.126	222.399	116.908	223.925	221.94	0.640928	1.0269	0.63656	0.540923	-0.641767	0.038299	-0.651631	-0.886505	0.6	G	ribonucleoside transporter	557	162	298	42	301	136	4470
FORC35_0043	243.999	154.757	160.456	125.258	116.798	310.064	0.478683	2.00355	0.657608	0.809386	-1.06286	1.00256	-0.6047	-0.3051	0.388		hypothetical protein	389	116	215	45	157	190	4468
FORC35_0045	8701.79	5029.6	3398.68	3643.62	11315.3	1904.45	1.30034	0.378647	0.390572	0.724435	0.378888	-1.40107	-1.35634	-0.465072	0.753	P	methionine ABC transporter substrate-binding protein	13873	3770	4554	1309	15210	1167	4466
FORC35_0046	1428.87	877.846	758.246	604.023	1078.71	977.517	0.754939	1.11354	0.530662	0.688074	-0.405568	0.155155	-0.914134	-0.539365	0.737	R	carboxylate/amino acid/amine transporter	2278	658	1016	217	1450	599	4464
FORC35_0047	84.6783	17.3435	27.6133	5.567	26.7817	21.2149	0.316276	1.22322	0.326097	0.320985	-1.66074	0.290683	-1.61663	-1.63942	0.192	G	sugar transporter	135	13	37	2	36	13	4462
FORC35_0049	67.1154	57.3668	94.0345	100.207	90.7603	130.553	1.3523	2.27576	1.40109	1.74677	0.435418	1.18635	0.486546	0.804688	0.726	G	transporter	107	43	126	36	122	80	4456
FORC35_0050	360.667	472.276	441.067	509.383	543.074	549.956	1.50575	1.16448	1.22292	1.07857	0.590482	0.219686	0.29033	0.109122	0.627	G	alpha-glucosidase	575	354	591	183	730	337	4454
FORC35_0051	5027.38	4150.42	5235.33	6017.96	6308.58	5902.64	1.25484	1.42218	1.04136	1.44996	0.327509	0.508102	0.0584742	0.536016	0.786		hypothetical protein	8015	3111	7015	2162	8480	3617	4452
FORC35_0052	182.529	1698.32	1517.24	1358.36	278.232	522.213	1.52432	0.307487	8.31233	0.799821	0.608166	-1.7014	3.05525	-0.322252	0.619	F	xanthine permease	291	1273	2033	488	374	320	4450
FORC35_0053	740.151	892.521	971.69	2079.29	1066.06	1907.71	1.44033	2.13744	1.31283	2.32968	0.526399	1.09588	0.392676	1.22013	0.664	E	sodium/glutamate symport carrier protein GltS	1180	669	1302	747	1433	1169	4448
FORC35_0054	267.207	421.579	306.732	617.94	395.774	514.053	1.48115	1.21935	1.14792	1.46577	0.56672	0.286114	0.199018	0.551663	0.642		hypothetical protein	426	316	411	222	532	315	4446
FORC35_0055	1965.79	4676.06	2679.98	4645.69	4905.52	1950.14	2.49544	0.417047	1.36331	0.993504	1.3193	-1.26172	0.447114	-0.00940291	0.281	L	ATP-dependent DNA helicase RecG	3134	3505	3591	1669	6594	1195	4444
FORC35_0056	865.6	1635.62	1020.2	1049.38	1958.79	798.007	2.26292	0.487892	1.1786	0.641582	1.17819	-1.03537	0.237079	-0.640295	0.335	J	tRNA methyltransferase	1380	1226	1367	377	2633	489	4442
FORC35_0057	6239.85	10722.3	8638.49	8286.52	9338.64	5871.63	1.49661	0.547611	1.38441	0.772834	0.581701	-0.868775	0.469267	-0.37177	0.63	K	bifunctional (p)ppGpp synthetase II/ guanosine-3 ',5'-bis pyrophosphate 3'-pyrophosphohydrolase	9948	8037	11575	2977	12553	3598	4440
FORC35_0058	1236.93	2173.27	2142.64	1486.4	1963.25	1876.7	1.58719	0.863539	1.73223	0.683945	0.666479	-0.211666	0.792627	-0.548047	0.582	K	DNA-directed RNA polymerase subunit omega	1972	1629	2871	534	2639	1150	4438
FORC35_0059	2498.95	3020.43	4092.74	1903.92	2542.78	3926.39	1.01754	1.29994	1.63778	0.630349	0.0250821	0.378449	0.711745	-0.665778	0.984	F	guanylate kinase	3984	2264	5484	684	3418	2406	4436
FORC35_0060	129.84	162.762	233.594	183.712	203.839	217.045	1.56992	1.33351	1.79909	1.12872	0.650692	0.415232	0.847265	0.174685	0.597	L	putative enzyme	207	122	313	66	274	133	4432
FORC35_0062	44.5345	66.7056	60.4508	36.1857	61.7468	35.9021	1.38649	0.538217	1.35739	0.542469	0.471441	-0.89374	0.440838	-0.882388	0.714	S	inner membrane protein	71	50	81	13	83	22	4430
FORC35_0063	205.11	141.416	138.813	203.197	203.095	88.1234	0.990176	0.623151	0.676773	1.43687	-0.0142424	-0.682347	-0.563255	0.522932	0.994		DNA damage-indicible protein DnaD	327	106	186	73	273	54	4428
FORC35_0064	1.2545	0	3.7315	2.7835	0.7439	3.2638	0.592985	-	2.97449	-	-0.753932	-	1.57264	-	1		hypothetical protein	2	0	5	1	1	2	4426
FORC35_0065	1575.02	2997.75	2462.06	2708.36	2786.04	2483.78	1.7689	0.828547	1.5632	0.903464	0.822851	-0.271345	0.6445	-0.146461	0.497	S	hypothetical protein	2511	2247	3299	973	3745	1522	4424
FORC35_0066	220.791	398.899	415.692	91.856	365.273	130.553	1.65439	0.327283	1.88274	0.230274	0.726295	-1.61139	0.912836	-2.11858	0.551	J	ribonuclease PH	352	299	557	33	491	80	4422
FORC35_0067	44.5345	97.3902	102.99	122.475	141.348	35.9021	3.1739	0.368642	2.31259	1.25757	1.66626	-1.43971	1.20951	0.330634	0.185	F	orotate phosphoribosyltransferase	71	73	138	44	190	22	4420
FORC35_0068	178.138	300.175	340.315	361.857	294.599	143.609	1.65377	0.478416	1.9104	1.20549	0.725756	-1.06366	0.933876	0.269614	0.554		reverse transcriptase	284	225	456	130	396	88	4418
FORC35_0069	454.127	772.451	614.21	250.516	798.988	197.462	1.7594	0.25563	1.35251	0.324314	0.81508	-1.96787	0.435636	-1.62454	0.503	K	division inhibitor protein	724	579	823	90	1074	121	4416
FORC35_0070	382.62	919.203	618.687	526.084	843.624	251.315	2.20486	0.273405	1.61697	0.572326	1.14069	-1.87089	0.693296	-0.80509	0.351	F	deoxyuridine 5'-triphosphate nucleotidohydrolase	610	689	829	189	1134	154	4414
FORC35_0071	928.952	1883.77	1953.08	1043.82	1798.1	670.717	1.93562	0.356051	2.10246	0.554112	0.952793	-1.48984	1.07208	-0.85175	0.433	H	phosphopantothenoylcysteine decarboxylase	1481	1412	2617	375	2417	411	4412
FORC35_0072	81.5421	108.063	107.468	94.6395	95.2239	135.449	1.16779	1.25343	1.31794	0.87578	0.223779	0.325876	0.39829	-0.19136	0.861	L	hypothetical protein	130	81	144	34	128	83	4410
FORC35_0073	1032.45	3052.45	2154.58	946.395	3534.44	406.347	3.42336	0.133122	2.08687	0.310045	1.77541	-2.90918	1.06134	-1.68945	0.152	J	50S ribosomal protein L28	1646	2288	2887	340	4751	249	4408
FORC35_0074	664.254	2586.84	1593.36	1068.87	2631.3	412.875	3.96129	0.159606	2.39872	0.413194	1.98597	-2.64742	1.26227	-1.27511	0.111	J	50S ribosomal protein L33	1059	1939	2135	384	3537	253	4406
FORC35_0075	146.776	804.47	430.618	1021.55	676.982	1436.09	4.61236	1.78513	2.93385	1.26984	2.20551	0.836032	1.5528	0.34465	0.081	L	formamidopyrimidine/5-formyluracil/ 5-hydroxymethyluracil DNA glycosylase	234	603	577	367	910	880	4404
FORC35_0076	466.044	808.472	632.867	656.909	1198.48	793.111	2.57161	0.981	1.35795	0.812532	1.36267	-0.027675	0.441435	-0.299503	0.267	H	phosphopantetheine adenylyltransferase	743	606	848	236	1611	486	4402
FORC35_0077	817.93	933.879	1023.18	676.394	1083.17	972.622	1.32429	1.04149	1.25095	0.724285	0.405214	0.0586439	0.323018	-0.465371	0.738	M	3-deoxy-D-manno-octulosonic acid transferase	1304	700	1371	243	1456	596	4400
FORC35_0078	1996.53	3112.48	3285.24	5116.1	1890.34	2488.67	0.946816	0.799577	1.64548	1.64374	-0.0788434	-0.322691	0.718506	0.716978	0.948	M	lipopolysaccharide core heptosyltransferase RfaQ	3183	2333	4402	1838	2541	1525	4398
FORC35_0079	1511.66	2402.74	2589.68	6427.13	2582.2	2314.06	1.70819	0.963092	1.71313	2.67492	0.772466	-0.0542542	0.776636	1.4195	0.524	M	glucosyltransferase	2410	1801	3470	2309	3471	1418	4396
FORC35_0080	1825.29	2286.67	2176.23	5194.04	2759.26	1888.13	1.51169	0.825711	1.19227	2.27144	0.596158	-0.276292	0.253705	1.18361	0.622		lipopolysaccharide core heptose(I) kinase RfaP	2910	1714	2916	1866	3709	1157	4394
FORC35_0081	2445.01	3455.35	3100.9	6802.91	3472.7	2307.53	1.42032	0.667813	1.26826	1.9688	0.506218	-0.582484	0.342848	0.97732	0.675	M	lipopolysaccharide 1,3-galactosyltransferase	3898	2590	4155	2444	4668	1414	4392
FORC35_0082	3037.76	4572	3363.6	7618.48	4209.94	2235.72	1.38587	0.489003	1.10726	1.66633	0.470793	-1.03208	0.147	0.736677	0.697	M	lipopolysaccharide 1,2-glucosyltransferase	4843	3427	4507	2737	5659	1370	4390
FORC35_0083	1617.04	2473.44	1716.5	4300.53	2098.65	1485.04	1.29783	0.600395	1.06151	1.73868	0.376102	-0.736016	0.0861152	0.797993	0.755	R	lipopolysaccharide core heptose(II) kinase RfaY	2578	1854	2300	1545	2821	910	4388
FORC35_0084	2249.31	3452.68	2644.91	5241.36	3072.46	1605.8	1.36596	0.465089	1.17588	1.51805	0.449914	-1.10442	0.233737	0.602223	0.709	M	UDP-galactose	3586	2588	3544	1883	4130	984	4386
FORC35_0085	1565.61	2789.63	1874.72	5708.99	2152.95	1488.31	1.37516	0.533514	1.19744	2.0465	0.459594	-0.906401	0.259952	1.03316	0.704	M	beta1,3-glucosyltransferase	2496	2091	2512	2051	2894	912	4384
FORC35_0086	1862.3	2446.76	1905.32	4203.11	1943.16	1284.32	1.04342	0.524905	1.0231	1.71782	0.0613251	-0.929872	0.0329501	0.780582	0.96	M	ligase	2969	1834	2553	1510	2612	787	4382
FORC35_0087	1037.47	1368.8	1167.97	1313.82	1310.07	980.781	1.26276	0.716527	1.12579	0.959833	0.336583	-0.480907	0.170937	-0.0591444	0.781	M	ADP-heptose	1654	1026	1565	472	1761	601	4380
FORC35_0088	1830.31	2688.24	2541.17	2310.32	2458.71	2364.65	1.34333	0.879627	1.38839	0.859417	0.425818	-0.185036	0.473409	-0.218569	0.724	M	ADP-heptose	2918	2015	3405	830	3305	1449	4378
FORC35_0089	3471.81	6370.39	6773.47	6095.9	5777.41	5558.3	1.66409	0.872522	1.95099	0.956912	0.734736	-0.196736	0.964207	-0.0635423	0.544	M	ADP-L-glycero-D-mannoheptose-6-epimerase	5535	4775	9076	2190	7766	3406	4376
FORC35_0090	2939.28	2554.82	3406.89	4420.22	1902.99	6903	0.647435	2.70195	1.15909	1.73015	-0.627193	1.434	0.212992	0.790894	0.604	H	2-amino-3-ketobutyrate CoA ligase	4686	1915	4565	1588	2558	4230	4374
FORC35_0091	4341.17	2925.71	4044.98	7615.7	2607.5	9494.48	0.600644	3.24519	0.93177	2.60303	-0.735419	1.6983	-0.101954	1.38019	0.544	C	L-threonine 3-dehydrogenase	6921	2193	5420	2736	3505	5818	4372
FORC35_0092	181.901	57.3668	77.6158	19.4846	26.0378	66.9085	0.143142	1.16633	0.426691	0.339649	-2.80448	0.221973	-1.22874	-1.55788	0.033	M	glycosyl transferase	290	43	104	7	35	41	4370
FORC35_0093	425.901	284.166	371.66	203.197	386.103	254.579	0.906557	0.895881	0.872646	0.715063	-0.14153	-0.158621	-0.196532	-0.483857	0.909	S	hypothetical protein	679	213	498	73	519	156	4368
FORC35_0094	489.252	482.949	653.017	300.62	519.268	267.634	1.06135	0.554167	1.33472	0.622467	0.0859001	-0.851607	0.416543	-0.683931	0.944	D	peptidase M37	780	362	875	108	698	164	4366
FORC35_0095	6447.47	8993.25	17919.5	18468.6	11608.4	9282.34	1.80046	1.03214	2.77931	2.05361	0.848363	0.0456453	1.47473	1.03816	0.484	G	phosphoglyceromutase	10279	6741	24011	6635	15604	5688	4364
FORC35_0096	1561.22	2526.81	2297.13	1525.37	1937.96	1759.2	1.24131	0.696216	1.47137	0.603673	0.311864	-0.522393	0.557161	-0.728161	0.796	P	hypothetical protein	2489	1894	3078	548	2605	1078	4362
FORC35_0097	738.897	1200.7	1428.43	1035.47	1711.8	966.094	2.3167	0.804608	1.93319	0.862386	1.21207	-0.313641	0.950985	-0.213595	0.321	O	glutaredoxin	1178	900	1914	372	2301	592	4360
FORC35_0098	2994.48	5730.01	4589.78	5708.99	6770.57	4588.95	2.26102	0.800862	1.53275	0.996331	1.17697	-0.320375	0.616121	-0.00530305	0.335	U	preprotein translocase subunit SecB	4774	4295	6150	2051	9101	2812	4358
FORC35_0099	2508.99	4604.02	4147.97	6816.83	5847.34	6893.21	2.33056	1.49722	1.65324	1.48062	1.22068	0.582282	0.725299	0.566206	0.317	C	NAD(P)H-dependent glycerol-3-phosphate dehydrogenase	4000	3451	5558	2449	7860	4224	4356
FORC35_0100	2066.78	2502.79	2577.74	2591.45	2244.46	3787.68	1.08597	1.51338	1.24723	1.03542	0.118984	0.597773	0.318723	0.0502208	0.922	E	serine acetyltransferase	3295	1876	3454	931	3017	2321	4354
FORC35_0101	133.603	178.771	191.8	114.124	284.184	101.179	2.12707	0.565969	1.43559	0.638382	1.08887	-0.821206	0.521649	-0.647509	0.377	J	rRNA methyltransferase	213	134	257	41	382	62	4352
FORC35_0102	254.035	987.243	793.323	651.342	627.883	1501.36	2.47164	1.52076	3.12289	0.659759	1.30547	0.604795	1.64288	-0.599989	0.288	C	L-lactate dehydrogenase	405	740	1063	234	844	920	4350
FORC35_0103	127.958	405.57	188.815	503.816	265.586	734.362	2.07556	1.81069	1.4756	1.24224	1.0535	0.85654	0.561302	0.312946	0.39	K	transcriptional regulator	204	304	253	181	357	450	4348
FORC35_0104	259.68	509.631	255.983	3498.88	302.038	2077.43	1.16312	4.07634	0.985762	6.86551	0.217997	2.02727	-0.0206886	2.77937	0.859	C	L-lactate permease	414	382	343	1257	406	1273	4346
FORC35_0105	2776.19	2145.25	1868.75	3426.51	2026.48	3802.36	0.729951	1.77245	0.673134	1.59725	-0.454129	0.825749	-0.571035	0.675591	0.707	U	adhesin	4426	1608	2504	1231	2724	2330	4344
FORC35_0106	1.2545	5.3365	14.9261	2.7835	1.4879	1.6319	1.18605	0.3058	11.898	0.521597	0.246165	-1.70934	3.57265	-0.938994	1		membrane protein	2	4	20	1	2	1	4342
FORC35_0107	712.552	959.227	1180.66	336.805	1458.12	429.194	2.04633	0.447437	1.65694	0.351122	1.03304	-1.16024	0.72852	-1.50996	0.396	D	hypothetical protein	1136	719	1582	121	1960	263	4340
FORC35_0108	1073.85	1492.87	2118.02	3874.65	1366.61	10463.8	1.27263	7.00921	1.97236	2.59544	0.347816	2.80925	0.979925	1.37598	0.774		hypothetical protein	1712	1119	2838	1392	1837	6412	4338
FORC35_0109	968.469	1563.58	2608.34	2438.36	1900.76	3350.32	1.96264	2.14273	2.69326	1.55947	0.972798	1.09945	1.42935	0.641058	0.424	K	mannitol repressor protein	1544	1172	3495	876	2555	2053	4336
FORC35_0110	1823.41	2497.46	4119.61	8550.96	2265.29	6281.24	1.24234	2.51505	2.25929	3.42386	0.313058	1.33059	1.17587	1.77563	0.795	G	mannitol-1-phosphate 5-dehydrogenase	2907	1872	5520	3072	3045	3849	4334
FORC35_0111	1460.86	2129.24	3415.84	9828.59	1868.03	6981.33	1.27872	3.27879	2.33824	4.616	0.354699	1.71316	1.22543	2.20664	0.769	G	PTS mannitol transporter subunit IIABC	2329	1596	4577	3531	2511	4278	4332
FORC35_0112	70.8789	66.7056	307.478	189.279	100.431	272.53	1.41694	4.08556	4.33807	2.83753	0.502784	2.03053	2.11705	1.50463	0.69		membrane protein	113	50	412	68	135	167	4328
FORC35_0114	487.998	380.222	2272.5	1199.69	485.791	3454.77	0.995477	9.08618	4.65678	3.15525	-0.00653977	3.18367	2.21933	1.65775	0.997	V	membrane protein	778	285	3045	431	653	2117	4326
FORC35_0117	319.269	128.075	178.367	102.99	107.871	241.524	0.337869	1.8858	0.558674	0.804139	-1.56547	0.915177	-0.839921	-0.314482	0.208	M	rhsA	509	96	239	37	145	148	4324
FORC35_0118	290.415	193.446	143.291	726.497	169.618	1129.29	0.584052	5.83772	0.493399	3.75555	-0.775831	2.54541	-1.01917	1.90902	0.525	C	lyase	463	145	192	261	228	692	4322
FORC35_0120	848.665	871.175	983.631	1235.88	1037.05	1148.87	1.22198	1.31876	1.15903	1.41864	0.289216	0.399179	0.212922	0.504504	0.811	M	rhsA	1353	653	1318	444	1394	704	4320
FORC35_0121	0	0	0	0	0	0	-	-	-	-	-	-	-	-	1		hypothetical protein	0	0	0	0	0	0	4318
FORC35_0122	661.745	580.339	656.749	384.125	589.198	646.239	0.89037	1.11355	0.99245	0.661898	-0.167523	0.155172	-0.0109339	-0.59532	0.891	O	glutathione S-transferase	1055	435	880	138	792	396	4316
FORC35_0123	551.977	1416.83	1296.33	1555.98	1809.25	626.656	3.27777	0.442295	2.34853	1.09822	1.71271	-1.17692	1.23176	0.135164	0.166	E	selenocysteine synthase	880	1062	1737	559	2432	384	4314
FORC35_0124	1312.2	3840.91	1985.92	3793.93	4154.14	984.045	3.16579	0.256201	1.51343	0.987769	1.66256	-1.96465	0.597819	-0.0177546	0.178	J	translation elongation factor	2092	2879	2661	1363	5584	603	4312
FORC35_0125	656.1	257.484	336.584	473.197	177.801	1228.83	0.270997	4.77247	0.513007	1.83778	-1.88365	2.25474	-0.96295	0.877961	0.131	C	alcohol dehydrogenase	1046	193	451	170	239	753	4310
FORC35_0126	327.423	917.869	906.761	6438.27	354.114	22215.3	1.08152	24.2031	2.76939	7.01436	0.113059	4.59712	1.46957	2.81031	0.927	C	aldehyde dehydrogenase family protein	522	688	1215	2313	476	13613	4308
FORC35_0127	5.018	2.6682	4.4778	0	2.2318	6.5277	0.444759	2.44648	0.892348	0	-1.1689	1.29071	-0.164322	-	0.568		membrane protein	8	2	6	0	3	4	4306
FORC35_0128	47.0435	12.007	10.4483	0	10.4151	8.1596	0.221393	0.67957	0.222099	0	-2.17532	-0.557305	-2.17073	-	0.102		membrane protein	75	9	14	0	14	5	4304
FORC35_0129	346.867	88.0514	92.5419	102.99	118.286	287.217	0.341012	3.26193	0.266793	1.16966	-1.5521	1.70572	-1.90621	0.226086	0.21	V	membrane protein	553	66	124	37	159	176	4302
FORC35_0130	981.641	496.29	559.729	793.302	1025.89	1060.75	1.04508	2.13735	0.570197	1.59846	0.0636071	1.09582	-0.810466	0.676687	0.959	K	LysR family transcriptional regulator	1565	372	750	285	1379	650	4300
FORC35_0131	116.041	53.3645	58.2118	52.8868	84.8088	145.24	0.730855	2.72167	0.50165	0.991048	-0.452344	1.44449	-0.995246	-0.0129726	0.715	M	membrane protein	185	40	78	19	114	89	4298
FORC35_0133	111.65	57.3668	74.6306	50.1033	77.3694	58.749	0.692964	1.02409	0.668434	0.873385	-0.529147	0.0343483	-0.581143	-0.19531	0.671	G	L-ribulose-5-phosphate 4-epimerase	178	43	100	18	104	36	4296
FORC35_0134	129.213	68.0397	67.1675	80.7219	84.0649	52.2213	0.650593	0.767512	0.519821	1.18639	-0.620174	-0.381738	-0.943914	0.246583	0.617	G	L-xylulose 5-phosphate 3-epimerase	206	51	90	29	113	32	4294
FORC35_0135	89.069	69.3738	54.4803	69.5879	48.3559	47.3256	0.542904	0.682183	0.611664	1.00309	-0.881231	-0.55177	-0.709189	0.00444556	0.486	G	3-keto-L-gulonate-6-phosphate decarboxylase	142	52	73	25	65	29	4292
FORC35_0136	77.7786	64.0374	61.1971	86.289	66.2104	79.9639	0.851268	1.24871	0.786812	1.34748	-0.232315	0.320434	-0.34591	0.430262	0.858	G	L-xylulose/3-keto-L-gulonate kinase	124	48	82	31	89	49	4290
FORC35_0137	82.7966	26.6822	29.8522	16.7011	29.7575	45.6936	0.359405	1.71251	0.360549	0.625927	-1.47632	0.776114	-1.47173	-0.675934	0.251	G	C4-dicarboxylate ABC transporter substrate-binding protein	132	20	40	6	40	28	4288
FORC35_0138	102.868	32.0187	65.6749	22.2681	35.709	66.9085	0.347133	2.08967	0.638435	0.695472	-1.52644	1.06327	-0.647387	-0.523936	0.224	G	dehydroascorbate transporter	164	24	88	8	48	41	4286
FORC35_0139	13.7994	1.3341	8.2094	2.7835	5.2076	4.8958	0.377379	3.66974	0.59491	2.08643	-1.40591	1.87568	-0.749257	1.06103	0.378	G	2,3-diketo-L-gulonate TRAP transporter permease	22	1	11	1	7	3	4284
FORC35_0140	8.7815	1.3341	11.9409	8.3505	5.9515	6.5277	0.677732	4.89296	1.35978	6.25928	-0.561214	2.29071	0.443372	2.646	0.772	G	hypothetical protein	14	1	16	3	8	4	4282
FORC35_0141	51.4342	72.0421	73.138	66.8043	70.674	78.332	1.37407	1.08731	1.42197	0.927295	0.458452	0.120762	0.507893	-0.108899	0.719	C	2,3-diketo-L-gulonate reductase	82	54	98	24	95	48	4280
FORC35_0142	820.439	1546.24	1176.92	929.694	1052.67	1183.14	1.28306	0.765173	1.43451	0.601263	0.359587	-0.386141	0.520554	-0.733933	0.766	K	transcriptional regulator	1308	1159	1577	334	1415	725	4278
FORC35_0144	4536.25	4732.1	2882.23	5781.36	4443.53	4273.99	0.979562	0.903191	0.635378	1.22173	-0.0297917	-0.146897	-0.654313	0.288929	0.98	E	valine--pyruvate aminotransferase	7232	3547	3862	2077	5973	2619	4274
FORC35_0145	303.587	274.827	403.751	378.558	702.276	786.583	2.31326	2.8621	1.32993	1.37744	1.20993	1.51708	0.411355	0.46199	0.323	G	alpha-amylase	484	206	541	136	944	482	4272
FORC35_0146	1.8817	6.6706	3.7315	0	4.4636	6.5277	2.37211	0.978578	1.98305	0	1.24617	-0.0312418	0.987719	-	0.568		hypothetical protein	3	5	5	0	6	4	4270
FORC35_0147	1679.14	1426.17	811.981	720.93	455.289	1793.48	0.271145	1.25755	0.483569	0.505502	-1.88287	0.330616	-1.0482	-0.98421	0.13	S	hypothetical protein	2677	1069	1088	259	612	1099	4268
FORC35_0148	826.711	697.741	629.136	475.981	682.934	2726.93	0.826085	3.90823	0.76101	0.682175	-0.275637	1.96652	-0.394012	-0.551787	0.82	K	transcriptional regulator	1318	523	843	171	918	1671	4266
FORC35_0149	341.222	154.757	194.04	203.197	231.364	8029.02	0.678046	51.8815	0.56866	1.313	-0.560545	5.69715	-0.814361	0.392872	0.646	G	xylose ABC transporter permease	544	116	260	73	311	4920	4264
FORC35_0150	381.366	162.762	143.291	178.145	162.922	9396.57	0.427207	57.7321	0.37573	1.09451	-1.22699	5.8513	-1.41223	0.13029	0.32	P	xylose ABC transporter ATP-binding protein	608	122	192	64	219	5758	4262
FORC35_0151	333.695	60.0351	79.8547	208.764	60.2589	21578.8	0.180581	359.437	0.239304	3.47736	-2.46928	8.48959	-2.06308	1.79799	0.054	G	xylose ABC transporter substrate-binding protein	532	45	107	75	81	13223	4260
FORC35_0152	686.208	732.428	970.944	1366.71	621.931	26133.5	0.906331	35.6807	1.41494	1.86599	-0.141891	5.15707	0.500742	0.899944	0.907	G	xylose isomerase	1094	549	1301	491	836	16014	4258
FORC35_0153	397.047	341.533	452.261	784.951	296.831	3219.77	0.747596	9.42741	1.13906	2.29832	-0.419669	3.23686	0.187846	1.20058	0.732	G	xylulokinase	633	256	606	282	399	1973	4256
FORC35_0154	70.2516	21.3458	24.6281	11.1341	24.5499	27.7426	0.349457	1.29967	0.35057	0.521606	-1.51681	0.378151	-1.51223	-0.938967	0.237	S	hypothetical protein	112	16	33	4	33	17	4254
FORC35_0155	151.166	28.0164	56.7192	27.8351	57.2831	55.4851	0.378941	1.98045	0.37521	0.993529	-1.39996	0.985829	-1.41423	-0.00936632	0.264	S	hypothetical protein	241	21	76	10	77	34	4252
FORC35_0156	458.517	198.783	215.682	147.526	301.294	223.572	0.657106	1.12471	0.470391	0.742149	-0.605802	0.16955	-1.08807	-0.43022	0.619	S	O-acetyltransferase	731	149	289	53	405	137	4250
FORC35_0157	196.328	65.3715	91.7956	47.3197	98.1997	114.234	0.500181	1.74746	0.467562	0.723858	-0.999477	0.80526	-1.09677	-0.466221	0.42		membrane protein	313	49	123	17	132	70	4248
FORC35_0158	1899.3	4526.64	3467.34	1842.69	4226.31	1005.26	2.22519	0.222076	1.82558	0.407076	1.15393	-2.17087	0.868358	-1.29663	0.344	J	glycyl-tRNA synthetase alpha subunit	3028	3393	4646	662	5681	616	4246
FORC35_0159	5867.27	21076.3	10317.7	16751.2	26494.6	3502.09	4.51566	0.166162	1.75852	0.794788	2.17494	-2.58933	0.814358	-0.331358	0.083	J	glycyl-tRNA synthetase	9354	15798	13825	6018	35614	2146	4244
FORC35_0160	8.7815	5.3365	7.4631	5.567	7.4394	17.9511	0.847167	3.36383	0.849866	1.04319	-0.239281	1.75011	-0.234692	0.0610062	0.929		endonuclease	14	4	10	2	10	11	4242
FORC35_0161	587.73	186.776	246.281	30.6187	160.69	45.6936	0.273408	0.244644	0.419037	0.163933	-1.87087	-2.03124	-1.25485	-2.60882	0.134	K	cold-shock protein	937	140	330	11	216	28	4240
FORC35_0162	6631.25	14818	15545.5	20982.1	3609.58	15624	0.544329	1.05439	2.34429	1.41599	-0.87745	0.076411	1.22915	0.501812	0.469	K	XRE family transcriptional regulator	10572	11107	20830	7538	4852	9574	4238
FORC35_0163	5539.84	8016.68	7319.77	7671.37	8132.72	5649.69	1.46804	0.704742	1.32129	0.956926	0.553893	-0.504833	0.401952	-0.0635215	0.646		hypothetical protein	8832	6009	9808	2756	10932	3462	4236
FORC35_0164	2849.58	5775.37	4019.6	1856.6	4507.51	1026.47	1.58182	0.177733	1.41059	0.321469	0.661582	-2.49222	0.496303	-1.63725	0.584	C	bifunctional glyoxylate/hydroxypyruvate reductasee B	4543	4329	5386	667	6059	629	4234
FORC35_0165	85.3055	169.432	137.32	102.99	219.461	65.2766	2.57265	0.385267	1.60975	0.607854	1.36326	-1.37607	0.686833	-0.718204	0.273	M	outer membrane lipoprotein	136	127	184	37	295	40	4232
FORC35_0166	1149.74	1471.53	1346.34	3504.44	2225.12	1791.84	1.93532	1.21768	1.17099	2.3815	0.952568	0.284132	0.227726	1.25187	0.433	C	biotin sulfoxide reductase	1833	1103	1804	1259	2991	1098	4230
FORC35_0167	193.192	244.143	232.847	217.114	236.572	137.081	1.22454	0.561479	1.20526	0.889293	0.292243	-0.832696	0.269349	-0.16927	0.814	E	acetyltransferase	308	183	312	78	318	84	4228
FORC35_0168	328.05	400.234	547.788	314.537	388.335	292.113	1.18377	0.729856	1.66983	0.785884	0.243386	-0.454317	0.739703	-0.347612	0.842	L	3-methyladenine DNA glycosylase	523	300	734	113	522	179	4226
FORC35_0169	2884.08	2492.12	3849.44	3941.46	1765.36	11908.1	0.612106	4.77829	1.33472	1.58157	-0.708147	2.2565	0.416539	0.661354	0.559	N	hypothetical protein	4598	1868	5158	1416	2373	7297	4224
FORC35_0170	116.668	114.734	163.441	10939.2	99.6875	182.774	0.854455	1.59303	1.40091	95.3444	-0.226923	0.671776	0.486361	6.57508	0.857	G	membrane protein	186	86	219	3930	134	112	4222
FORC35_0171	269.716	288.168	323.897	242.166	202.351	394.924	0.750236	1.37046	1.20088	0.840363	-0.414583	0.454662	0.264092	-0.250916	0.734	R	phosphoethanolamine transferase	430	216	434	87	272	242	4220
FORC35_0172	18.1902	16.0094	14.1798	27.8351	7.4394	63.6447	0.408978	3.97546	0.77953	1.73867	-1.2899	1.99112	-0.359324	0.797986	0.363		hypothetical protein	29	12	19	10	10	39	4216
FORC35_0173	25397.2	14625.9	6977.96	8161.26	19082.7	2496.83	0.751371	0.170713	0.274753	0.558002	-0.412403	-2.55035	-1.86379	-0.841658	0.732	E	peptide ABC transporter substrate-binding protein	40490	10963	9350	2932	25651	1530	4214
FORC35_0174	26.9716	21.3458	14.9261	16.7011	46.1241	6.5277	1.7101	0.305807	0.553401	0.782407	0.77408	-1.70931	-0.853604	-0.354009	0.546		hypothetical protein	43	16	20	6	62	4	4212
FORC35_0175	1632.1	338.865	417.185	250.516	582.503	94.6511	0.356905	0.279318	0.255613	0.739282	-1.48639	-1.84002	-1.96797	-0.435804	0.227	P	peptide ABC transporter permease	2602	254	559	90	783	58	4210
FORC35_0176	1267.04	297.507	418.677	395.259	724.595	174.615	0.571881	0.586927	0.330438	1.32857	-0.806214	-0.768746	-1.59755	0.409875	0.507	P	dipeptide transport system permease protein dppC	2020	223	561	142	974	107	4208
FORC35_0177	1442.04	452.264	762.724	651.342	1437.29	145.24	0.996703	0.321141	0.52892	1.44018	-0.00476412	-1.63872	-0.918878	0.526251	0.997	E	peptide ABC transporter ATP-binding protein	2299	339	1022	234	1932	89	4206
FORC35_0178	2018.48	611.023	1172.45	1049.38	2113.52	192.566	1.04709	0.315153	0.580856	1.71742	0.0663818	-1.66587	-0.783747	0.780244	0.956	E	peptide ABC transporter ATP-binding protein	3218	458	1571	377	2841	118	4204
FORC35_0179	451.618	222.797	276.133	77.9384	349.65	125.657	0.774218	0.564001	0.611431	0.349818	-0.369189	-0.826231	-0.709738	-1.51532	0.762	E	inner membrane transporter YhjV	720	167	370	28	470	77	4202
FORC35_0180	1.8817	9.3388	3.7315	0	0	1.6319	0	0.174744	1.98305	0	-	-2.51668	0.987719	-	0.354		hypothetical protein	3	7	5	0	0	1	4200
FORC35_0183	10.6632	20.0117	15.6724	19.4846	18.5984	16.3192	1.74417	0.815483	1.46977	0.97366	0.802538	-0.294273	0.555586	-0.0385094	0.598		hypothetical protein	17	15	21	7	25	10	4198
FORC35_0187	2744.2	1460.85	1991.14	2992.28	1890.34	3255.67	0.688849	2.22861	0.725581	2.04831	-0.537739	1.15614	-0.462791	1.03443	0.656		membrane protein	4375	1095	2668	1075	2541	1995	4194
FORC35_0188	197.583	133.411	146.276	250.516	139.86	163.192	0.707856	1.22322	0.740327	1.87778	-0.498472	0.290687	-0.433765	0.909025	0.687		membrane protein	315	100	196	90	188	100	4192
FORC35_0189	7842.46	3911.62	5750.28	5319.3	6324.95	7962.12	0.8065	2.03551	0.733224	1.35987	-0.310253	1.02539	-0.447674	0.44347	0.797		cellulose biosynthesis protein BcsE	12503	2932	7705	1911	8502	4879	4190
FORC35_0190	109.768	32.0187	82.0936	36.1857	96.7118	50.5894	0.881055	1.58	0.747881	1.13014	-0.182696	0.65992	-0.419119	0.176505	0.888		hypothetical protein	175	24	110	13	130	31	4188
FORC35_0191	564.522	185.442	370.168	119.691	248.475	419.402	0.440151	2.26164	0.655719	0.645438	-1.18393	1.17737	-0.608851	-0.631649	0.335	D	cell division protein	900	139	496	43	334	257	4186
FORC35_0192	809.775	569.666	443.305	832.271	679.214	649.502	0.838769	1.14015	0.547443	1.46098	-0.253655	0.189219	-0.869221	0.546937	0.834	M	cellulose synthase catalytic subunit	1291	427	594	299	913	398	4184
FORC35_0193	1716.15	1168.68	1180.66	1890.01	1719.24	842.068	1.0018	0.720528	0.687969	1.61721	0.00259639	-0.472873	-0.539585	0.693508	0.999		cyclic di-GMP regulator CdgR	2736	876	1582	679	2311	516	4182
FORC35_0194	519.987	440.257	481.367	704.229	686.654	308.432	1.32052	0.700573	0.925728	1.59959	0.401106	-0.513393	-0.111339	0.677699	0.741	G	endonuclease III	829	330	645	253	923	189	4180
FORC35_0195	1174.21	1032.6	1229.91	1714.64	1330.16	894.29	1.13282	0.866054	1.04744	1.66051	0.179914	-0.207471	0.0668695	0.731624	0.882	U	cellulose synthase operon protein C	1872	774	1648	616	1788	548	4178
FORC35_0196	560.759	548.32	916.463	1297.12	517.78	1844.06	0.923357	3.36312	1.63433	2.36562	-0.11504	1.7498	0.708698	1.24222	0.925		cellulose synthase subunit BcsC	894	411	1228	466	696	1130	4176
FORC35_0197	922.053	1174.02	1001.54	2068.15	1057.13	1897.92	1.1465	1.6166	1.08621	1.7616	0.197238	0.692962	0.119302	0.816886	0.871	T	biofilm formation regulator HmsP	1470	880	1342	743	1421	1163	4174
FORC35_0198	10.036	14.6752	11.9409	41.7527	10.4151	32.6383	1.03777	2.22404	1.18981	2.84512	0.0534923	1.15319	0.250727	1.50849	1		transcriptional regulator	16	11	16	15	14	20	4172
FORC35_0199	254.035	377.554	350.017	14332.3	395.031	2816.69	1.55502	7.46036	1.37783	37.961	0.636937	2.89925	0.4624	5.24645	0.602	C	C4-dicarboxylate transporter	405	283	469	5149	531	1726	4170
FORC35_0200	805.385	1480.86	1089.61	1294.33	929.177	1502.99	1.15371	1.01494	1.3529	0.87404	0.206276	0.0213998	0.436057	-0.194229	0.865	O	hypothetical protein	1284	1110	1460	465	1249	921	4168
FORC35_0201	439.7	525.64	492.562	537.218	545.306	530.373	1.24018	1.009	1.12022	1.02203	0.310546	0.0129306	0.163785	0.0314328	0.799	G	ketodeoxygluconokinase	701	394	660	193	733	325	4166
FORC35_0202	0	1.3341	2.2389	0	1.4879	0	-	0	-	0	-	-	-	-	0.569		hypothetical protein	0	1	3	0	2	0	4164
FORC35_0203	16.3084	20.0117	27.6133	11.1341	22.3181	35.9021	1.3685	1.79406	1.69319	0.55638	0.452599	0.843225	0.759748	-0.845859	0.748	T	signal peptide protein	26	15	37	4	30	22	4162
FORC35_0204	4210.71	3373.97	6468.98	6933.73	1757.18	11602.9	0.417312	3.43895	1.53632	2.05507	-1.2608	1.78197	0.619475	1.03919	0.302	M	hypothetical protein	6713	2529	8668	2491	2362	7110	4160
FORC35_0205	8131	11856.3	3309.12	4679.09	7237.76	2113.33	0.890144	0.178246	0.406976	0.394651	-0.167889	-2.48806	-1.29699	-1.34135	0.889	G	transporter	12963	8887	4434	1681	9729	1295	4158
FORC35_0206	3094.84	2782.96	4187.52	5438.99	4235.23	4492.66	1.36848	1.61435	1.35307	1.95439	0.452579	0.690952	0.436234	0.966719	0.708	S	membrane protein	4934	2086	5611	1954	5693	2753	4156
FORC35_0207	280.379	344.201	260.461	111.341	370.481	141.977	1.32136	0.412482	0.928958	0.323476	0.402018	-1.2776	-0.106314	-1.62827	0.741	K	LysR family transcripitonal regulator	447	258	349	40	498	87	4154
FORC35_0208	300.451	166.764	161.202	183.712	181.521	202.357	0.60416	1.21344	0.536533	1.10163	-0.726997	0.279098	-0.898261	0.139638	0.552	T	LuxR family transcriptional regulator	479	125	216	66	244	124	4152
FORC35_0209	5059.37	4427.92	5854.77	17900.8	3028.57	9355.77	0.598605	2.11291	1.15721	4.04271	-0.740323	1.07923	0.210654	2.01532	0.541	G	trehalase	8066	3319	7845	6431	4071	5733	4150
FORC35_0210	479.844	164.096	235.086	651.342	412.885	618.496	0.860457	3.76912	0.489923	3.96928	-0.216825	1.91423	-1.02937	1.98888	0.859	P	cytochrome C peroxidase	765	123	315	234	555	379	4148
FORC35_0211	176736	250810	289281	954796	43015.9	1.03595e+06	0.243391	4.13042	1.63679	3.80684	-2.03865	2.04629	0.710873	1.92859	0.102	E	glutamate decarboxylase	281765	187998	387617	343018	57822	634808	4146
FORC35_0212	17342.1	17498.2	21428.7	11354	22838.9	28687.4	1.31696	1.63945	1.23564	0.648864	0.397211	0.713212	0.305263	-0.624013	0.742	K	AraC family transcriptional regulator	27648	13116	28713	4079	30700	17579	4144
FORC35_0213	16889.2	6458.44	6920.49	7234.35	9902.54	23298.9	0.586323	3.60751	0.409757	1.12014	-0.770234	1.851	-1.28716	0.163679	0.525	K	AraC family transcriptional regulator	26926	4841	9273	2599	13311	14277	4142
FORC35_0214	21431.8	32493.6	21942.9	62467.6	13806.7	34596.6	0.644218	1.06472	1.02385	1.92246	-0.63438	0.0904735	0.0340021	0.942952	0.6	P	multidrug transporter	34168	24356	29402	22442	18559	21200	4140
FORC35_0215	9546.07	10084.6	9159.41	11546	4601.25	16798.9	0.482005	1.66581	0.959496	1.14492	-1.05288	0.736223	-0.059652	0.195248	0.387	M	multidrug transporter	15219	7559	12273	4148	6185	10294	4138
FORC35_0217	14887.1	19828.9	23286.2	30393.2	9112.48	70957.3	0.612107	3.57848	1.56419	1.53277	-0.708144	1.83935	0.645417	0.616143	0.558	T	LuxR family transcriptional regulator	23734	14863	31202	10919	12249	43481	4136
FORC35_0218	11420.3	17407.5	30547	34465.5	12394.7	28320.3	1.08533	1.6269	2.67481	1.97992	0.118129	0.702126	1.41943	0.985443	0.922	S	acid-resistance protein HdeD	18207	13048	40931	12382	16661	17354	4134
FORC35_0219	71047.6	198106	176838	415234	75216.5	405918	1.05868	2.04899	2.48901	2.09601	0.0822629	1.03491	1.31557	1.06765	0.946		acid-resistance protein	113269	148493	236951	149176	101106	248737	4132
FORC35_0220	50274.4	111450	98540	223252	43803	213404	0.871278	1.91479	1.96004	2.00315	-0.198796	0.937185	0.970883	1.00227	0.869		protein hdeB	80151	83539	132037	80205	58880	130769	4130
FORC35_0221	2786.86	2650.88	2925.52	1464.13	1804.05	3913.33	0.647341	1.47624	1.04976	0.552318	-0.627402	0.561926	0.0700531	-0.85643	0.604	S	hypothetical protein	4443	1987	3920	526	2425	2398	4128
FORC35_0222	2855.85	1803.72	1923.98	715.363	1148.64	2593.11	0.402205	1.43765	0.673695	0.396604	-1.314	0.52371	-0.569832	-1.33423	0.283	T	LuxR family transcriptional regulator	4553	1352	2578	257	1544	1589	4126
FORC35_0223	29649.3	68155.8	77072.5	137444	45343	86958.3	1.52931	1.27587	2.59947	2.01662	0.612879	0.351487	1.37822	1.01194	0.612	M	membrane protein	47269	51087	103272	49378	60950	53286	4124
FORC35_0224	23.8354	9.3388	30.5985	2.7835	8.9272	9.7915	0.374535	1.04848	1.28374	0.298058	-1.41683	0.0682927	0.360355	-1.74634	0.301	M	hypothetical protein	38	7	41	1	12	6	4122
FORC35_0225	259.053	253.481	374.645	197.63	278.976	393.292	1.07691	1.55156	1.44621	0.779661	0.106896	0.63372	0.532279	-0.359081	0.932	P	arsenate reductase	413	190	502	71	375	241	4120
FORC35_0226	245.881	309.514	342.554	523.301	394.286	469.992	1.60357	1.51848	1.39317	1.69072	0.681286	0.602631	0.478374	0.757636	0.577	P	arylsulfatase	392	232	459	188	530	288	4118
FORC35_0227	28.2261	68.0397	52.2414	41.7527	79.6012	26.1107	2.82013	0.383757	1.85082	0.613652	1.49576	-1.38174	0.888164	-0.704507	0.239	K	ArsR family transcriptional regulator	45	51	70	15	107	16	4116
FORC35_0228	1260.77	3221.88	2722.52	9029.72	2885.73	2810.16	2.28887	0.872211	2.15942	2.80262	1.19464	-0.197252	1.11064	1.48678	0.328		hypothetical protein	2010	2415	3648	3244	3879	1722	4114
FORC35_0229	8.7815	14.6752	15.6724	38.9692	26.0378	6.5277	2.96507	0.444812	1.78471	2.65545	1.56807	-1.16873	0.835687	1.40895	0.261		hypothetical protein	14	11	21	14	35	4	4112
FORC35_0230	2233	4431.92	5136.08	8214.15	5259.63	6441.17	2.35541	1.45336	2.30008	1.85341	1.23598	0.539391	1.20168	0.890179	0.312	C	glutathione reductase	3560	3322	6882	2951	7070	3947	4110
FORC35_0231	488.625	603.019	961.988	370.207	873.382	842.068	1.78743	1.39642	1.96876	0.613924	0.837885	0.481735	0.977291	-0.703869	0.49	R	hypothetical protein	779	452	1289	133	1174	516	4108
FORC35_0232	11313.6	17087.3	17123.2	27395.3	13908.6	21554.3	1.22937	1.26142	1.5135	1.60326	0.297918	0.335053	0.597891	0.681006	0.805	E	oligopeptidase A	18037	12808	22944	9842	18696	13208	4106
FORC35_0233	313.623	724.423	682.123	882.374	828.746	695.196	2.64249	0.959655	2.17498	1.21804	1.4019	-0.0594124	1.121	0.284558	0.254		methyltransferase	500	543	914	317	1114	426	4104
FORC35_0234	1753.78	1210.04	2348.62	3178.77	969.35	4259.3	0.55272	3.51997	1.33918	2.627	-0.85538	1.81556	0.421346	1.39342	0.481	E	dipeptide and tripeptide permease B	2796	907	3147	1142	1303	2610	4102
FORC35_0235	7627.32	21396.5	21073.4	27882.5	24522.4	7591.67	3.21507	0.354809	2.76289	1.30313	1.68485	-1.49488	1.46618	0.381984	0.172	T	universal stress protein A	12160	16038	28237	10017	32963	4652	4100
FORC35_0236	1071.34	1552.91	3100.9	8762.5	2038.39	6738.18	1.90266	4.33908	2.89442	5.64265	0.928015	2.11739	1.53327	2.49637	0.445		universal stress protein B	1708	1164	4155	3148	2740	4129	4098
FORC35_0237	2431.21	2805.64	3774.07	3304.03	2318.85	4525.3	0.953786	1.61293	1.55234	1.17764	-0.0682631	0.689685	0.634447	0.235899	0.955	P	phosphate transporter PitA	3876	2103	5057	1187	3117	2773	4096
FORC35_0238	790.958	440.257	543.311	1035.47	883.797	1181.51	1.11738	2.68368	0.686902	2.35196	0.160114	1.42421	-0.541824	1.23386	0.895	R	membrane protein	1261	330	728	372	1188	724	4094
FORC35_0239	9832.72	35551.4	31852.3	109668	9616.87	96740	0.978048	2.72113	3.23942	3.08476	-0.0320227	1.4442	1.69574	1.62516	0.979		membrane protein	15676	26648	42680	39399	12927	59280	4092
FORC35_0240	48.298	162.762	148.515	189.279	43.8923	122.394	0.908781	0.751981	3.07497	1.16292	-0.137996	-0.411232	1.62057	0.217753	0.917		hypothetical protein	77	122	199	68	59	75	4088
FORC35_0242	546.332	269.491	285.089	478.764	200.863	678.877	0.367658	2.51911	0.521823	1.77655	-1.44357	1.33291	-0.938367	0.829081	0.242		triose-phosphate isomerase	871	202	382	172	270	416	4086
FORC35_0243	2.509	4.0023	0.7463	2.7835	5.2076	0	2.07557	0	0.297449	0.695475	1.05351	-	-1.74928	-0.523929	0.624		hypothetical protein	4	3	1	1	7	0	4084
FORC35_0244	720.079	961.895	557.49	1386.19	2279.42	535.268	3.16552	0.556473	0.774207	1.4411	1.66244	-0.845617	-0.369209	0.527174	0.178	V	membrane protein	1148	721	747	498	3064	328	4082
FORC35_0245	1706.74	2083.88	1091.1	2925.47	3293.41	946.511	1.92965	0.454205	0.639289	1.40386	0.94834	-1.13858	-0.64546	0.489396	0.435	V	heme ABC exporter, ATP-binding protein CcmA	2721	1562	1462	1051	4427	580	4080
FORC35_0246	525.633	743.101	548.535	1174.64	1384.47	414.507	2.6339	0.557807	1.04357	1.58073	1.3972	-0.842162	0.0615276	0.660593	0.255	V	membrane protein	838	557	735	422	1861	254	4078
FORC35_0247	740.151	780.456	790.338	1029.9	1120.37	1044.43	1.5137	1.33823	1.06781	1.31961	0.598082	0.420322	0.0946492	0.400116	0.621	S	DNA repair protein HhH-GPD	1180	585	1059	370	1506	640	4076
FORC35_0248	261.562	316.185	326.135	86.289	267.817	140.345	1.02392	0.443869	1.24688	0.272907	0.0340967	-1.17179	0.318319	-1.87352	0.98	K	nickel responsive regulator	417	237	437	31	360	86	4074
FORC35_0249	36.3803	40.0234	70.899	111.341	145.812	96.283	4.00798	2.40567	1.94883	2.78189	2.00288	1.26644	0.962608	1.47606	0.116	E	nickel ABC transporter ATP-binding protein	58	30	95	40	196	59	4072
FORC35_0251	10.6632	17.3435	38.0616	41.7527	82.577	22.8468	7.74411	1.31731	3.56944	2.4074	2.9531	0.397597	1.8357	1.26747	0.031	P	nickel ABC transporter permease	17	13	51	15	111	14	4068
FORC35_0252	18.8174	21.3458	79.1084	33.4022	127.957	40.7979	6.79994	1.91128	4.204	1.56481	2.76552	0.934543	2.07176	0.645991	0.035	P	nickel ABC transporter permease	30	16	106	12	172	25	4066
FORC35_0253	31.9896	29.3505	553.013	94.6395	531.915	75.0681	16.6277	2.55764	17.2873	3.22446	4.05552	1.35481	4.11164	1.68906	0.003	E	nickel ABC transporter substrate-binding protein	51	22	741	34	715	46	4064
FORC35_0254	471.062	612.357	730.633	729.281	507.365	815.958	1.07707	1.33249	1.55103	1.19094	0.107106	0.41412	0.63323	0.2521	0.931	H	ACP synthase	751	459	979	262	682	500	4062
FORC35_0255	567.031	655.049	845.564	1717.43	690.373	2428.29	1.21752	3.70704	1.49121	2.62183	0.283949	1.89027	0.576487	1.39057	0.815	S	pheromone autoinducer 2 transporter	904	491	1133	617	928	1488	4060
FORC35_0256	233.336	176.103	170.158	136.392	464.217	99.5469	1.98948	0.565277	0.72924	0.774503	0.99239	-0.82297	-0.455535	-0.368657	0.417	G	MFS transporter	372	132	228	49	624	61	4058
FORC35_0257	1717.4	2293.34	2211.3	1981.86	4094.63	1261.47	2.3842	0.550059	1.28759	0.864182	1.25351	-0.862343	0.36467	-0.210593	0.305		hypothetical protein	2738	1719	2963	712	5504	773	4056
FORC35_0258	180.02	152.089	224.638	172.578	228.389	241.524	1.26869	1.58804	1.24785	1.13472	0.343335	0.66725	0.319446	0.182334	0.782	S	membrane protein	287	114	301	62	307	148	4054
FORC35_0259	135.485	141.416	176.128	155.877	217.23	158.296	1.60334	1.11936	1.29998	1.10226	0.681084	0.162679	0.378489	0.140462	0.577	O	small ubiquitous protein required for normal growth	216	106	236	56	292	97	4052
FORC35_0260	1146.61	957.893	1535.15	2123.82	2439.37	2390.76	2.12747	2.49585	1.33886	2.21718	1.08914	1.31953	0.421009	1.14873	0.371	P	zinc/cadmium/mercury/lead-transporting ATPase	1828	718	2057	763	3279	1465	4050
FORC35_0261	1687.92	1323.44	2124.73	1834.34	2631.3	2238.99	1.5589	1.6918	1.25879	1.38604	0.640531	0.758555	0.332034	0.470966	0.596	S	membrane protein	2691	992	2847	659	3537	1372	4048
FORC35_0262	237.726	348.203	278.372	147.526	378.664	138.713	1.59286	0.398367	1.17098	0.423679	0.671615	-1.32783	0.227711	-1.23896	0.582		hypothetical protein	379	261	373	53	509	85	4046
FORC35_0263	84.6783	110.731	141.798	119.691	173.337	97.9149	2.04701	0.884257	1.67455	1.08091	1.03352	-0.177463	0.743774	0.112253	0.403	S	hypothetical protein	135	83	190	43	233	60	4044
FORC35_0264	399.556	587.009	550.027	439.795	814.611	479.783	2.03879	0.817335	1.3766	0.749213	1.02771	-0.291001	0.461105	-0.416551	0.4	L	ribosomal RNA small subunit methyltransferase D	637	440	737	158	1095	294	4042
FORC35_0265	1560.59	2485.45	1799.34	2037.53	1879.18	1733.09	1.20415	0.697296	1.15299	0.819784	0.268015	-0.520158	0.205379	-0.286685	0.824	U	cell division protein FtsY	2488	1863	2411	732	2526	1062	4040
FORC35_0266	1030.57	1883.77	1205.28	2371.55	1819.67	1191.3	1.7657	0.632402	1.16954	1.25894	0.820239	-0.661085	0.225935	0.332213	0.499	D	cell division protein FtsE	1643	1412	1615	852	2446	730	4038
FORC35_0267	1554.94	2673.56	1856.06	4428.57	3095.52	2242.25	1.99076	0.838676	1.19365	1.65643	0.993319	-0.253814	0.255382	0.728079	0.414	D	cell division protein FtsX	2479	2004	2487	1591	4161	1374	4036
FORC35_0269	15254.6	13238.4	6696.6	4606.72	12404.4	1460.56	0.813156	0.110328	0.438988	0.347981	-0.298396	-3.18013	-1.18775	-1.52292	0.804	E	amino acid ABC transporter substrate-binding protein	24320	9923	8973	1655	16674	895	4032
FORC35_0270	482.353	402.902	367.182	729.281	520.012	607.073	1.07807	1.50675	0.761232	1.81007	0.108456	0.59144	-0.393592	0.856046	0.93	S	hypothetical protein	769	302	492	262	699	372	4030
FORC35_0271	785.313	815.143	576.894	759.899	951.495	788.215	1.21161	0.966966	0.734604	0.932229	0.276929	-0.0484627	-0.444961	-0.101244	0.819	R	acetyltransferase	1252	611	773	273	1279	483	4028
FORC35_0272	168.102	162.762	209.712	58.4538	232.852	52.2213	1.38518	0.320845	1.24753	0.359137	0.470077	-1.64005	0.319071	-1.47739	0.701		hypothetical protein	268	122	281	21	313	32	4026
FORC35_0273	2.509	1.3341	0.7463	0	0	1.6319	0	1.22322	0.297449	0	-	0.290686	-1.74928	-	0.234		hypothetical protein	4	1	1	0	0	1	4024
FORC35_0274	6616.82	4945.55	1788.89	1558.77	7073.35	851.86	1.06899	0.172248	0.270355	0.315186	0.0962549	-2.53744	-1.88707	-1.66573	0.936	E	amino acid ABC transporter substrate-binding protein	10549	3707	2397	560	9508	522	4022
FORC35_0275	1637.11	1238.06	500.025	709.796	2171.55	228.468	1.32645	0.184538	0.305431	0.573315	0.407572	-2.43801	-1.71108	-0.8026	0.736	E	branched-chain amino acid transporter permease subunit LivH	2610	928	670	255	2919	140	4020
FORC35_0276	3699.5	3590.1	1647.1	1405.67	5717.9	553.219	1.54559	0.154096	0.445221	0.391542	0.628154	-2.6981	-1.16741	-1.35276	0.603	E	high-affinity branched-chain amino acid transport system permease livM	5898	2691	2207	505	7686	339	4018
FORC35_0277	3400.3	3782.21	2050.1	1686.81	5804.2	540.164	1.70696	0.142817	0.602917	0.445985	0.771432	-2.80776	-0.729968	-1.16493	0.524	E	amino acid ABC transporter ATP-binding protein	5421	2835	2747	606	7802	331	4016
FORC35_0278	3000.12	2670.89	2228.47	1653.41	5331.05	515.685	1.77695	0.193076	0.742793	0.619047	0.8294	-2.37276	-0.428968	-0.69188	0.494	E	amino acid ABC transporter ATP-binding protein	4783	2002	2986	594	7166	316	4014
FORC35_0279	8884.32	1178.02	568.685	5667.24	1579.38	31043.9	0.177771	26.3526	0.0640099	4.81081	-2.49191	4.71987	-3.96556	2.26628	0.05	G	glycerol-3-phosphate ABC transporter substrate-binding protein	14164	883	762	2036	2123	19023	4012
FORC35_0281	903.862	266.822	162.695	244.949	239.548	3099.01	0.265027	11.6145	0.179999	0.918024	-1.91579	3.53785	-2.47394	-0.123397	0.125	G	glycerol-3-phosphate transporter membrane protein	1441	200	218	88	322	1899	4008
FORC35_0282	1589.44	733.762	706.751	723.714	761.047	4567.73	0.478814	6.22509	0.444654	0.986306	-1.06246	2.63809	-1.16925	-0.0198925	0.383	G	glycerol-3-phosphate ABC transporter ATP-binding protein	2534	550	947	260	1023	2799	4006
FORC35_0283	1820.27	1071.29	1476.19	1330.52	1103.26	5424.49	0.606096	5.0635	0.810975	1.24198	-0.722382	2.34013	-0.302271	0.312638	0.551	C	cytoplasmic glycerophosphodiester phosphodiesterase	2902	803	1978	478	1483	3324	4004
FORC35_0284	2947.43	2844.33	4647.24	9252.4	2528.64	11237.4	0.857913	3.9508	1.57671	3.25293	-0.221096	1.98215	0.656917	1.70174	0.855		hypothetical protein	4699	2132	6227	3324	3399	6886	4002
FORC35_0285	9353.5	6039.53	7424.99	7980.34	5690.37	4809.26	0.608368	0.796297	0.79382	1.32135	-0.716983	-0.328622	-0.333117	0.402014	0.553	E	gamma-glutamyltranspeptidase	14912	4527	9949	2867	7649	2947	4000
FORC35_0286	416.492	308.18	383.601	523.301	514.06	483.047	1.23426	1.56742	0.921029	1.69804	0.30365	0.648391	-0.118681	0.763867	0.803	J	acetyltransferase	664	231	514	188	691	296	3998
FORC35_0287	2292.59	2991.08	5689.09	5124.45	4593.81	3888.85	2.00377	1.30015	2.48151	1.71324	1.00272	0.378679	1.31122	0.776731	0.409	R	oxidoreductase	3655	2242	7623	1841	6175	2383	3996
FORC35_0288	560.759	776.453	1093.34	1230.31	967.862	1191.3	1.72599	1.53428	1.94975	1.58453	0.787422	0.617564	0.963288	0.664055	0.517	R	quercetin 2,3-dioxygenase	894	582	1465	442	1301	730	3994
FORC35_0290	1653.42	2143.92	2682.22	2488.46	1961.76	3213.24	1.18649	1.49877	1.62222	1.16071	0.246694	0.58378	0.697974	0.215004	0.838	K	transcriptional regulator	2636	1607	3594	894	2637	1969	3992
FORC35_0291	121.059	150.755	5544.3	2674.96	6449.93	563.011	53.2794	3.73462	45.7985	17.7438	5.73551	1.90096	5.51723	4.14924	0	G	gluconate kinase 1	193	113	7429	961	8670	345	3990
FORC35_0292	215.773	244.143	5255.48	1277.63	5950.01	342.702	27.5753	1.4037	24.3566	5.23314	4.78531	0.489232	4.60624	2.38768	0.001	E	gluconate transporter	344	183	7042	459	7998	210	3988
FORC35_0293	119.177	196.114	108.214	91.856	124.237	75.0681	1.04246	0.382777	0.908014	0.468379	0.0599961	-1.38542	-0.139213	-1.09425	0.963	U	membrane protein	190	147	145	33	167	46	3986
FORC35_0294	17184.7	28316.5	43134.2	29739.1	14639.2	4770.09	0.851875	0.168456	2.51004	1.05024	-0.231287	-2.56956	1.32771	0.0707149	0.848	E	aspartate-semialdehyde dehydrogenase	27397	21225	57797	10684	19678	2923	3984
FORC35_0295	12364.3	31806.6	33387.5	62698.7	21585.3	11146	1.74578	0.35043	2.70032	1.97125	0.803872	-1.5128	1.43313	0.97911	0.507	G	glycogen-branching protein	19712	23841	44737	22525	29015	6830	3982
FORC35_0296	6090.56	13984.2	17085.2	35982.5	9555.87	10037.9	1.56896	0.717806	2.80519	2.57309	0.649811	-0.478335	1.4881	1.3635	0.591	G	glycogen-debranching protein	9710	10482	22893	12927	12845	6151	3980
FORC35_0297	5195.48	9733.68	20384.6	23267.4	8315.73	7518.23	1.60057	0.772394	3.92352	2.3904	0.678584	-0.372592	1.97215	1.25725	0.575	G	glucose-1-phosphate adenylyltransferase	8283	7296	27314	8359	11178	4607	3978
FORC35_0298	7581.53	12674.1	16223.9	25410.7	7842.58	10103.2	1.03443	0.797155	2.13993	2.00494	0.0488397	-0.327069	1.09756	1.00356	0.968	G	glycogen synthase	12087	9500	21739	9129	10542	6191	3976
FORC35_0299	17427.4	33463.5	33414.3	72967	19905.5	24522.8	1.1422	0.732821	1.91734	2.18049	0.191809	-0.448466	0.939108	1.12466	0.873	G	glycogen/starch/alpha-glucan phosphorylases family protein	27784	25083	44773	26214	26757	15027	3974
FORC35_0301	178.765	90.7196	91.0493	41.7527	91.5042	78.332	0.511868	0.863452	0.509323	0.460239	-0.966157	-0.211812	-0.973347	-1.11954	0.433	P	phosphate ABC transporter substrate-binding prot ein	285	68	122	15	123	48	3972
FORC35_0302	136.74	34.6869	57.4655	33.4022	50.5877	22.8468	0.369956	0.658658	0.420254	0.962963	-1.43457	-0.602399	-1.25067	-0.0544478	0.252		hypothetical protein	218	26	77	12	68	14	3970
FORC35_0303	60.8429	21.3458	24.6281	5.567	23.062	11.4234	0.379042	0.535159	0.404782	0.260801	-1.39957	-0.90196	-1.30478	-1.93898	0.28		hypothetical protein	97	16	33	2	31	7	3968
FORC35_0304	48.9252	13.3411	20.1503	19.4846	11.903	8.1596	0.24329	0.611614	0.411859	1.46049	-2.03925	-0.709307	-1.27978	0.546457	0.119		membrane protein	78	10	27	7	16	5	3966
FORC35_0305	1329.14	989.911	547.042	5873.22	1534	7627.57	1.15413	7.70531	0.411577	5.93307	0.206808	2.94585	-1.28076	2.56878	0.864	C	aerobic glycerol-3-phosphate dehydrogenase	2119	742	733	2110	2062	4674	3964
FORC35_0306	245.253	157.425	117.17	91.856	176.313	158.296	0.718901	1.00553	0.477751	0.58349	-0.476134	0.00795648	-1.06567	-0.777221	0.697	P	thiosulfate sulfurtransferase	391	118	157	33	237	97	3962
FORC35_0307	662.372	836.488	662.719	548.352	741.705	858.388	1.11977	1.02618	1.00052	0.655541	0.163203	0.0372839	0.000755375	-0.609242	0.893	R	intramembrane serine protease GlpG	1056	627	888	197	997	526	3960
FORC35_0308	978.505	1300.76	1021.69	1341.65	1420.92	1677.61	1.45213	1.28972	1.04414	1.03144	0.538174	0.367053	0.0623101	0.0446584	0.656	K	transcriptional regulator	1560	975	1369	482	1910	1028	3958
FORC35_0309	176.884	245.477	264.192	272.784	301.294	282.321	1.70335	1.15009	1.49359	1.11124	0.768374	0.201753	0.578788	0.152176	0.53	K	Fis family transcriptional regulator	282	184	354	98	405	173	3956
FORC35_0310	443.463	437.589	503.01	732.064	455.289	1191.3	1.02667	2.72242	1.13428	1.67295	0.0379688	1.44489	0.181772	0.742395	0.975	S	RNA-splicing ligase	707	328	674	263	612	730	3954
FORC35_0311	360.04	388.227	474.65	584.538	445.618	675.613	1.23769	1.74025	1.31833	1.50566	0.307653	0.799298	0.39871	0.590398	0.801	A	RNA 3'-terminal-phosphate cyclase	574	291	636	210	599	414	3952
FORC35_0312	3563.39	11628.1	5551.02	33892.1	17028	9208.9	4.77859	0.791951	1.55779	2.91466	2.25658	-0.336517	0.639503	1.54333	0.073	K	HTH-type transcriptional regulator malT	5681	8716	7438	12176	22889	5643	3950
FORC35_0313	2204.14	2003.84	1935.17	9118.79	6095.82	3345.43	2.76562	1.66951	0.877969	4.55067	1.4676	0.739426	-0.187758	2.18608	0.232	G	glycogen phosphorylase	3514	1502	2593	3276	8194	2050	3948
FORC35_0314	1734.96	1306.1	2093.39	4770.94	6414.22	2248.78	3.69704	1.72176	1.20659	3.65283	1.88637	0.783882	0.270933	1.86901	0.129	G	4-alpha-glucanotransferase	2766	979	2805	1714	8622	1378	3946
FORC35_0315	217.655	456.266	6677.94	5856.51	14269.5	690.3	65.5601	1.51293	30.6814	12.8357	6.03475	0.597348	4.93929	3.68209	0	E	high-affinity gluconate transporter	347	342	8948	2104	19181	423	3944
FORC35_0316	2042.32	5516.55	3922.58	1806.5	2992.86	5155.22	1.46542	0.9345	1.92065	0.327469	0.551318	-0.097733	0.941598	-1.61057	0.648	O	Fe/S biogenesis protein NfuA	3256	4135	5256	649	4023	3159	3942
FORC35_0317	176.884	478.946	383.601	261.65	390.567	200.726	2.20804	0.419098	2.16866	0.546304	1.14277	-1.25464	1.11681	-0.872223	0.352	R	DNA utilization protein GntX	282	359	514	94	525	123	3940
FORC35_0318	299.197	342.867	432.857	231.032	599.613	194.198	2.00408	0.566395	1.44673	0.673823	1.00294	-0.82012	0.532797	-0.569557	0.411	R	carboxylesterase BioH	477	257	580	83	806	119	3938
FORC35_0320	135.485	181.439	167.919	133.609	199.375	176.247	1.47156	0.971382	1.23939	0.736382	0.557349	-0.0418891	0.309627	-0.441473	0.648	S	transposase	216	136	225	48	268	108	3936
FORC35_0321	168.102	338.865	395.542	1027.12	427.02	57.117	2.54024	0.168554	2.35299	3.03105	1.34497	-2.56872	1.23449	1.59982	0.275	K	iron transporter	268	254	530	369	574	35	3934
FORC35_0322	9836.48	17949.1	30787.3	30195.6	31700.6	2315.69	3.22276	0.129014	3.12991	1.68228	1.6883	-2.9544	1.64612	0.750421	0.172	P	iron transporter	15682	13454	41253	10848	42612	1419	3932
FORC35_0323	895.081	2481.45	4286.03	1283.2	5199.37	212.149	5.80883	0.085494	4.78843	0.517117	2.53825	-3.54803	2.25955	-0.951436	0.046	P	iron transporter	1427	1860	5743	461	6989	130	3930
FORC35_0324	3.1362	2.6682	2.9852	5.567	2.9758	0	0.948855	0	0.951853	2.08643	-0.07574	-	-0.07119	1.06103	1		hypothetical protein	5	2	4	2	4	0	3928
FORC35_0325	1984.61	5152.34	2378.48	3387.54	6066.81	817.59	3.05693	0.158683	1.19846	0.657475	1.61208	-2.65578	0.261183	-0.604991	0.191	K	transcription accessory protein	3164	3862	3187	1217	8155	501	3926
FORC35_0326	516.224	512.299	795.562	634.641	800.476	801.27	1.55064	1.56407	1.54112	1.23881	0.632861	0.645303	0.623977	0.308955	0.602	K	transcription elongation factor GreB	823	384	1066	228	1076	491	3924
FORC35_0327	5080.07	4207.79	4715.91	8473.02	5049.1	10537.3	0.993903	2.50423	0.928315	2.01365	-0.00882247	1.32437	-0.107314	1.00981	0.994	T	transcriptional regulator	8099	3154	6319	3044	6787	6457	3922
FORC35_0328	1789.53	1530.23	1473.21	2363.2	1422.41	3489.04	0.794848	2.28008	0.823235	1.54435	-0.33125	1.18908	-0.280624	0.626999	0.784	T	osmolarity sensor protein	2853	1147	1974	849	1912	2138	3920
FORC35_0329	3046.54	5445.85	4987.56	28133	7588.16	8539.81	2.49075	1.56813	1.63712	5.16595	1.31658	0.649049	0.711164	2.36903	0.282	C	phosphoenolpyruvate carboxykinase [ATP]	4857	4082	6683	10107	10200	5233	3918
FORC35_0330	2.509	0	2.9852	2.7835	2.2318	6.5277	0.889518	-	1.1898	-	-0.168905	-	0.250715	-	1		hypothetical protein	4	0	4	1	3	4	3916
FORC35_0331	480.471	584.341	762.724	782.168	675.495	1011.79	1.4059	1.7315	1.58745	1.33855	0.491495	0.792024	0.666713	0.420667	0.685	R	inner membrane protein	766	438	1022	281	908	620	3914
FORC35_0332	1771.34	3373.97	2750.14	4345.07	3233.15	5661.12	1.82525	1.67788	1.55257	1.28782	0.868095	0.746639	0.634658	0.364931	0.474	O	Hsp33 chaperonin	2824	2529	3685	1561	4346	3469	3912
FORC35_0333	517.479	957.893	840.34	1107.84	790.061	1635.18	1.52675	1.70706	1.62391	1.15654	0.610465	0.771513	0.699474	0.209812	0.615	J	ribosome-associated heat shock protein Hsp15	825	718	1126	398	1062	1002	3910
FORC35_0334	1097.68	1415.49	1664.26	1661.76	1086.89	2694.29	0.99017	1.90343	1.51616	1.17398	-0.0142513	0.928602	0.600422	0.231406	0.991	R	nucleotidase	1750	1061	2230	597	1461	1651	3908
FORC35_0335	1537.38	1492.87	1044.08	1291.55	1621.04	1188.03	1.05442	0.795805	0.67913	0.865145	0.0764431	-0.329513	-0.558241	-0.208986	0.95		hypothetical protein	2451	1119	1399	464	2179	728	3906
FORC35_0337	1374.3	645.71	540.325	325.671	753.608	959.566	0.548359	1.48606	0.393165	0.504361	-0.866808	0.571495	-1.34679	-0.987471	0.475	L	adenosine nucleotide hydrolase	2191	484	724	117	1013	588	3904
FORC35_0338	432.173	991.245	698.542	665.26	903.883	381.868	2.09149	0.385241	1.61635	0.671135	1.06453	-1.37617	0.692738	-0.575324	0.383	M	penicillin-binding protein 1a	689	743	936	239	1215	234	3902
FORC35_0339	97.8505	130.743	148.515	147.526	169.618	156.664	1.73344	1.19826	1.51777	1.12837	0.793635	0.260939	0.601956	0.174238	0.519	N	DNA utilization protein HofM	156	98	199	53	228	96	3900
FORC35_0340	15.6812	45.3598	25.3744	41.7527	49.0998	19.583	3.13113	0.431726	1.61814	0.920478	1.64668	-1.21181	0.694338	-0.119545	0.209	U	fimbrial assembly family protein	25	34	34	15	66	12	3898
FORC35_0341	5.6452	20.0117	19.404	8.3505	29.0135	11.4234	5.1395	0.570836	3.43726	0.417281	2.36163	-0.808852	1.78126	-1.26091	0.093		DNA utilization protein HofO	9	15	26	3	39	7	3896
FORC35_0342	5.6452	9.3388	14.9261	5.567	8.9272	3.2638	1.58138	0.349488	2.64403	0.596115	0.661183	-1.51668	1.40274	-0.746337	0.687		hypothetical protein	9	7	20	2	12	2	3894
FORC35_0343	50.807	89.3855	102.244	80.7219	123.493	89.7554	2.43064	1.00414	2.0124	0.903076	1.28134	0.00595792	1.00892	-0.147081	0.302	U	outer membrane porin HofQ	81	67	137	29	166	55	3892
FORC35_0344	2609.97	4858.84	3742.72	2121.04	2297.28	2176.98	0.880192	0.448045	1.43401	0.436532	-0.18411	-1.15829	0.520053	-1.19584	0.879	E	shikimate kinase	4161	3642	5015	762	3088	1334	3890
FORC35_0346	10382.8	16452.3	11367.7	15512.5	16255	11444.6	1.56557	0.695626	1.09486	0.94288	0.646688	-0.523617	0.130746	-0.0848532	0.593	S	cell division protein DamX	16553	12332	15232	5573	21850	7013	3886
FORC35_0347	1246.34	2541.48	1500.82	1141.24	1536.23	907.345	1.23259	0.357014	1.20418	0.449045	0.301697	-1.48595	0.268055	-1.15507	0.803	L	DNA adenine methylase	1987	1905	2011	410	2065	556	3884
FORC35_0348	2502.09	4301.18	3093.44	3571.25	4567.03	1352.86	1.82529	0.314532	1.23634	0.830296	0.868124	-1.66872	0.306079	-0.268303	0.474	G	ribulose-phosphate 3-epimerase	3989	3224	4145	1283	6139	829	3882
FORC35_0349	2113.82	3482.03	2240.41	2911.56	4083.47	1181.51	1.9318	0.339315	1.05989	0.836166	0.949942	-1.5593	0.083909	-0.258139	0.434	R	phosphoglycolate phosphatase	3370	2610	3002	1046	5489	724	3880
FORC35_0350	3283.01	5718	3814.37	6068.06	7864.16	2296.11	2.39541	0.401557	1.16185	1.06122	1.26027	-1.31632	0.216425	0.0857239	0.302	J	tryptophanyl-tRNA synthetase	5234	4286	5111	2180	10571	1407	3878
FORC35_0351	37.0076	369.549	195.532	1672.89	252.939	512.422	6.83477	1.38661	5.28357	4.52685	2.77289	0.471565	2.40151	2.17851	0.033		hypothetical protein	59	277	262	601	340	314	3876
FORC35_0352	21.9536	82.715	58.9581	389.692	113.078	218.677	5.15079	2.64374	2.68558	4.71126	2.36479	1.40258	1.42523	2.23611	0.069		hypothetical protein	35	62	79	140	152	134	3874
FORC35_0353	6.2725	9.3388	20.1503	30.6187	22.3181	26.1107	3.55809	2.79594	3.21248	3.27865	1.8311	1.48333	1.68369	1.7131	0.187	E	hypothetical protein	10	7	27	11	30	16	3872
FORC35_0354	55.825	82.715	99.2586	108.557	81.0891	120.762	1.45256	1.45997	1.77803	1.31242	0.538597	0.545943	0.830281	0.392233	0.67	G	mutase	89	62	133	39	109	74	3870
FORC35_0355	18.8174	28.0164	59.7045	27.8351	37.1968	73.4362	1.97672	2.62119	3.17283	0.993529	0.983111	1.39022	1.66577	-0.00936632	0.471	R	hydrolase	30	21	80	10	50	45	3868
FORC35_0356	13.7994	14.6752	20.8966	13.9176	14.8787	21.2149	1.07821	1.44563	1.51431	0.948375	0.108643	0.531698	0.598663	-0.0764697	0.958	L	membrane protein	22	11	28	5	20	13	3866
FORC35_0357	43.9073	80.0467	114.931	33.4022	91.5042	76.7	2.08403	0.958191	2.61759	0.417284	1.05938	-0.0616153	1.38824	-1.2609	0.396		hypothetical protein	70	60	154	12	123	47	3864
FORC35_0358	50.807	113.4	107.468	91.856	80.3452	135.449	1.58138	1.19444	2.11522	0.810021	0.661185	0.256335	1.08081	-0.303968	0.593	K	hypothetical protein	81	85	144	33	108	83	3862
FORC35_0359	731.997	1123.32	1148.56	779.384	1224.52	962.83	1.67285	0.857127	1.56908	0.69382	0.742307	-0.222419	0.649922	-0.527366	0.541	K	GntR family transcriptional regulator	1167	842	1539	280	1646	590	3860
FORC35_0360	66.4881	74.7103	131.35	141.959	124.237	115.866	1.86857	1.55087	1.97554	1.90013	0.901933	0.633078	0.982246	0.926097	0.465	G	fructoselysine 6-kinase	106	56	176	51	167	71	3858
FORC35_0361	36.3803	65.3715	84.3325	89.0725	81.8331	78.332	2.24938	1.19826	2.31808	1.36256	1.16953	0.26094	1.21293	0.446318	0.351	G	fructoselysine 3-epimerase	58	49	113	32	110	48	3856
FORC35_0362	63.3519	132.077	123.887	189.279	156.227	205.621	2.46601	1.55683	1.95553	1.43309	1.30218	0.63861	0.967562	0.519134	0.297	M	fructoselysine-6-P-deglycase	101	99	166	68	210	126	3854
FORC35_0363	45.789	60.0351	73.138	64.0208	69.9301	120.762	1.52722	2.01152	1.59728	1.06639	0.610913	1.00829	0.67562	0.0927345	0.632	E	fructoselysine transporter	73	45	98	23	94	74	3852
FORC35_0364	30.1078	13.3411	9.702	8.3505	8.9272	27.7426	0.296508	2.07948	0.322242	0.625923	-1.75386	1.05623	-1.63378	-0.675943	0.198		membrane protein	48	10	13	3	12	17	3850
FORC35_0365	1028.68	1355.46	1219.46	968.663	1123.34	869.811	1.09202	0.64171	1.18546	0.714639	0.127	-0.640007	0.245446	-0.484714	0.917	H	siroheme synthase	1640	1016	1634	348	1510	533	3848
FORC35_0366	35.1258	29.3505	458.232	100.207	102.663	14.6872	2.92273	0.500407	13.0454	3.41413	1.54732	-0.998826	3.70547	1.77152	0.219	P	putative nitrite transporter	56	22	614	36	138	9	3846
FORC35_0367	15.0539	36.021	1815.02	773.817	287.16	22.8468	19.0754	0.634263	120.568	21.4824	4.25364	-0.656846	6.9137	4.42508	0.002	C	nitrite reductase small subunit	24	27	2432	278	386	14	3844
FORC35_0368	255.917	2529.48	69959.4	4726.41	22736.9	225.204	88.8451	0.089032	273.368	1.86853	6.47322	-3.48953	8.0947	0.901905	0	C	nitrite reductase [NAD(P)H] large subunit	408	1896	93741	1698	30563	138	3842
FORC35_0369	0	1.3341	2.2389	0	0.7439	1.6319	-	1.22322	-	0	-	0.290686	-	-	1		hypothetical protein	0	1	3	0	1	1	3840
FORC35_0370	326.796	284.166	339.569	233.815	206.815	221.94	0.632856	0.781024	1.03909	0.822812	-0.660051	-0.35656	0.0553171	-0.281365	0.59	G	transporter	521	213	455	84	278	136	3838
FORC35_0371	3.7635	10.6729	10.4483	8.3505	2.9758	22.8468	0.7907	2.14064	2.77622	0.782402	-0.338797	1.09804	1.47312	-0.354018	0.851		hypothetical protein	6	8	14	3	4	14	3836
FORC35_0372	706.907	772.451	926.165	459.28	732.778	620.128	1.0366	0.802806	1.31017	0.594575	0.0518554	-0.316877	0.389749	-0.75007	0.967	O	peptidyl-prolyl cis-trans isomerase	1127	579	1241	165	985	380	3834
FORC35_0374	4151.12	4197.12	7286.18	14869.5	3939.89	13812.5	0.949115	3.29096	1.75523	3.5428	-0.0753448	1.71851	0.811663	1.82489	0.95	D	cell filamentation protein Fic	6618	3146	9763	5342	5296	8464	3832
FORC35_0375	425.273	380.222	695.557	690.312	312.454	825.749	0.734712	2.17176	1.63555	1.81555	-0.444748	1.11886	0.709778	0.860406	0.713	E	anthranilate synthase subunit II	678	285	932	248	420	506	3830
FORC35_0376	3390.27	2333.36	2082.94	1653.41	4163.81	168.087	1.22817	0.0720365	0.614388	0.708594	0.296506	-3.79513	-0.702779	-0.496968	0.806	E	succinyldiaminopimelate aminotransferase	5405	1749	2791	594	5597	103	3828
FORC35_0377	1209.96	1630.29	864.222	1155.16	1313.79	465.096	1.08582	0.285285	0.714257	0.708562	0.11878	-1.80952	-0.485484	-0.497033	0.922	S	membrane protein	1929	1222	1158	415	1766	285	3826
FORC35_0378	7949.1	10603.5	8861.63	7200.95	9532.81	5744.34	1.19923	0.541739	1.1148	0.679109	0.26211	-0.88433	0.156782	-0.558284	0.828	T	transcriptional regulator	12673	7948	11874	2587	12814	3520	3824
FORC35_0379	493.643	815.143	723.916	723.714	778.902	487.943	1.57786	0.598598	1.46648	0.887837	0.657973	-0.74034	0.552355	-0.171633	0.588	O	hypothetical protein	787	611	970	260	1047	299	3822
FORC35_0380	1372.42	1700.99	1576.2	1870.52	1859.1	1711.88	1.35462	1.0064	1.14848	1.09966	0.437885	0.00920387	0.199731	0.137063	0.717	C	phosphoribulokinase	2188	1275	2112	672	2499	1049	3820
FORC35_0381	220.791	257.484	242.549	406.393	222.437	424.298	1.00746	1.64786	1.09855	1.57833	0.0107174	0.720597	0.135598	0.658395	0.994	S	hypothetical protein	352	193	325	146	299	260	3818
FORC35_0382	996.695	1364.8	1048.56	1455.78	1428.36	1806.53	1.4331	1.32366	1.05204	1.06666	0.519135	0.404536	0.0731847	0.0931043	0.668	R	hydrolase	1589	1023	1405	523	1920	1107	3816
FORC35_0383	1678.51	2280	1508.28	2638.77	2416.31	2049.69	1.43955	0.898986	0.898584	1.15736	0.525621	-0.15363	-0.154275	0.210834	0.664	R	glutathione ABC transporter ATP-binding protein	2676	1709	2021	948	3248	1256	3814
FORC35_0384	383.248	137.414	76.1232	300.62	203.839	437.353	0.531872	3.18275	0.198627	2.1877	-0.910849	1.67027	-2.33187	1.12941	0.455	R	potassium transporter	611	103	102	108	274	268	3812
FORC35_0385	895.708	820.479	335.091	1249.8	822.05	1186.4	0.917766	1.44599	0.374108	1.52325	-0.123802	0.532055	-1.41848	0.607157	0.919	P	potassium transporter	1428	615	449	449	1105	727	3810
FORC35_0386	181.901	180.105	173.143	256.083	208.302	189.302	1.14514	1.05107	0.95185	1.42185	0.195521	0.0718521	-0.0711942	0.507774	0.874	S	glutathione-regulated potassium-efflux system protein kefB	290	135	232	92	280	116	3808
FORC35_0387	11853.7	14795.3	17556.1	12286.4	17290.6	14821.1	1.45866	1.00174	1.48106	0.830428	0.544648	0.00250901	0.566633	-0.268073	0.652	O	peptidyl-prolyl cis-trans isomerase	18898	11090	23524	4414	23242	9082	3806
FORC35_0388	210.128	268.156	466.441	411.96	393.543	469.992	1.87287	1.75268	2.2198	1.53627	0.905254	0.80956	1.15043	0.619429	0.46	S	lysis protein	335	201	625	148	529	288	3804
FORC35_0389	5208.66	8336.87	6519.73	2858.67	6544.41	4083.05	1.25645	0.489759	1.25171	0.342895	0.329352	-1.02986	0.3239	-1.54416	0.785	O	peptidylprolyl isomerase	8304	6249	8736	1027	8797	2502	3802
FORC35_0390	1670.36	2098.56	2076.22	1778.67	1963.99	2888.49	1.17579	1.37642	1.24298	0.847566	0.233633	0.460917	0.313804	-0.238603	0.847	S	hypothetical protein	2663	1573	2782	639	2640	1770	3800
FORC35_0391	372.584	516.301	462.709	395.259	449.338	574.434	1.206	1.11259	1.24189	0.765559	0.270233	0.153928	0.312539	-0.385415	0.823	P	sulfur transfer complex subunit TusD	594	387	620	142	604	352	3798
FORC35_0392	193.192	245.477	230.608	186.495	236.572	243.155	1.22454	0.990544	1.19367	0.759728	0.292243	-0.0137069	0.25541	-0.396445	0.814	P	sulfur relay protein TusC	308	184	309	67	318	149	3796
FORC35_0393	163.084	189.444	197.025	114.124	146.556	163.192	0.89865	0.861424	1.20812	0.602416	-0.154168	-0.215204	0.27276	-0.731167	0.904	P	sulfur transfer complex subunit TusB	260	142	264	41	197	100	3794
FORC35_0394	4687.41	15429	9984.82	3791.15	17115.8	4309.89	3.65143	0.279337	2.13013	0.245716	1.86846	-1.83992	1.09094	-2.02494	0.132	J	30S ribosomal protein S12	7473	11565	13379	1362	23007	2641	3792
FORC35_0395	5558.66	22866.7	11934.2	6919.82	22580	6633.74	4.06213	0.290105	2.14695	0.302616	2.02223	-1.78535	1.10229	-1.72444	0.105	J	30S ribosomal protein S7	8862	17140	15991	2486	30352	4065	3790
FORC35_0396	35425	205222	90979.1	129795	263889	47038.3	7.44924	0.229207	2.56822	0.632461	2.89709	-2.12528	1.36077	-0.660951	0.025	J	elongation factor G	56477	153827	121906	46630	354720	28824	3788
FORC35_0397	47493.9	187019	148533	125806	297315	32233.6	6.26007	0.172355	3.12742	0.672695	2.64618	-2.53654	1.64498	-0.571975	0.038	J	elongation factor Tu	75718	140182	199025	45197	399651	19752	3786
FORC35_0398	1054.4	828.484	921.687	865.673	1099.54	1377.34	1.04281	1.66248	0.874133	1.04489	0.0604739	0.733336	-0.194075	0.0633488	0.961		periplasmic endochitinase	1681	621	1235	311	1478	844	3784
FORC35_0399	0	0	0	0	0	0	-	-	-	-	-	-	-	-	1		membrane protein	0	0	0	0	0	0	3782
FORC35_0400	1911.22	2242.64	2405.34	1458.56	2698.26	745.785	1.4118	0.332548	1.25854	0.650376	0.497535	-1.58837	0.331748	-0.620654	0.68	P	bacterioferritin-associated ferredoxin	3047	1681	3223	524	3627	457	3780
FORC35_0401	7365.76	2430.75	5283.84	37221.2	3059.81	59786.9	0.41541	24.596	0.717352	15.3126	-1.26739	4.62035	-0.479246	3.93665	0.3	P	bacterioferritin	11743	1822	7080	13372	4113	36636	3778
FORC35_0402	652.337	193.446	349.271	431.445	233.596	1013.42	0.358092	5.23876	0.535415	2.23031	-1.4816	2.38923	-0.901269	1.15724	0.23	N	methyltransferase	1040	145	468	155	314	621	3776
FORC35_0403	41.3983	46.6939	62.6897	25.0516	48.3559	39.166	1.16806	0.838782	1.51431	0.536507	0.22412	-0.253632	0.598657	-0.898331	0.873	U	general secretion pathway protein M	66	35	84	9	65	24	3774
FORC35_0404	186.919	214.792	244.042	161.444	220.205	270.898	1.17808	1.26121	1.3056	0.751628	0.236432	0.334809	0.384712	-0.411909	0.851	U	putative general protein secretion protein	298	161	327	58	296	166	3772
FORC35_0405	89.6963	138.748	155.232	102.99	138.372	148.504	1.54268	1.07032	1.73064	0.742283	0.625435	0.0980408	0.791302	-0.42996	0.609	U	type II secretion system (T2SS), K family protein	143	104	208	37	186	91	3770
FORC35_0406	37.6348	41.3575	49.2562	27.8351	52.8195	50.5894	1.40347	1.22322	1.30879	0.673036	0.489003	0.290686	0.388238	-0.571244	0.708	U	type II secretion system protein J	60	31	66	10	71	31	3768
FORC35_0407	10.036	17.3435	15.6724	16.7011	17.8545	13.0553	1.77905	0.752749	1.56162	0.96296	0.831103	-0.409759	0.643042	-0.0544519	0.581	U	type II secretion system protein I	16	13	21	6	24	8	3766
FORC35_0408	27.5989	6.6706	20.8966	16.7011	23.806	21.2149	0.862571	3.18036	0.757153	2.50369	-0.213286	1.66919	-0.401343	1.32405	0.902	U	general secretion pathway protein H	44	5	28	6	32	13	3764
FORC35_0409	23.8354	16.0094	27.6133	41.7527	33.4772	44.0617	1.40452	2.75224	1.1585	2.60801	0.490073	1.46061	0.212257	1.38295	0.719	U	general secretion pathway protein G	38	12	37	15	45	27	3762
FORC35_0410	185.038	154.757	222.399	189.279	198.631	187.67	1.07346	1.21268	1.20191	1.22307	0.102272	0.278196	0.265331	0.29051	0.936	U	general secretion pathway protein F	295	116	298	68	267	115	3760
FORC35_0411	125.449	118.736	99.2586	111.341	136.884	86.4915	1.09115	0.728435	0.791225	0.937716	0.125854	-0.457127	-0.33784	-0.0927777	0.926	U	secretion system protein E	200	89	133	40	184	53	3758
FORC35_0412	296.688	177.437	191.8	158.66	233.596	210.517	0.787347	1.18643	0.646473	0.894179	-0.344928	0.246631	-0.629339	-0.161365	0.779	U	secretion system protein D	473	133	257	57	314	129	3756
FORC35_0413	198.837	37.3551	84.3325	27.8351	66.9543	76.7	0.336729	2.05327	0.424128	0.745149	-1.57034	1.03792	-1.23743	-0.4244	0.209	U	pilus assembly protein PilZ	317	28	113	10	90	47	3754
FORC35_0414	149.912	68.0397	112.692	64.0208	67.6983	102.811	0.451587	1.51104	0.751722	0.940933	-1.14692	0.595542	-0.411729	-0.0878361	0.356		general secretion pathway protein A	239	51	151	23	91	63	3752
FORC35_0415	95.3415	92.0537	102.99	72.3714	76.6255	182.774	0.803695	1.98552	1.08022	0.786187	-0.31528	0.989517	0.111331	-0.347056	0.799		protein secretion protein GspB	152	69	138	26	103	112	3750
FORC35_0416	640.419	15236.9	6958.55	5683.94	17966.1	324.751	28.0536	0.0213135	10.8656	0.373038	4.81012	-5.55209	3.4417	-1.42261	0.001	J	30S ribosomal protein S10	1021	11421	9324	2042	24150	199	3748
FORC35_0417	1845.36	50143.9	21140.6	17491.6	60412.9	1021.58	32.7377	0.0203729	11.4561	0.348828	5.03288	-5.6172	3.51804	-1.51941	0	J	50S ribosomal protein L3	2942	37586	28327	6284	81207	626	3746
FORC35_0418	1226.27	31383.7	15397.8	14360.2	45508.8	629.919	37.1117	0.0200716	12.5566	0.457568	5.2138	-5.6387	3.65038	-1.12794	0	J	50S ribosomal protein L4	1955	23524	20632	5159	61173	386	3744
FORC35_0419	474.199	14212.3	6508.53	7465.39	19789.5	316.592	41.7324	0.0222759	13.7253	0.525276	5.3831	-5.48837	3.77877	-0.928851	0	J	50S ribosomal protein L23	756	10653	8721	2682	26601	194	3742
FORC35_0420	2461.32	63106.2	35994.3	34607.4	96428.4	1886.49	39.1776	0.029894	14.624	0.5484	5.29196	-5.064	3.87027	-0.866699	0	J	50S ribosomal protein L2	3924	47302	48230	12433	129619	1156	3740
FORC35_0421	67.1154	2037.19	1226.93	1171.86	2844.07	60.3809	42.3758	0.0296393	18.2808	0.575234	5.40517	-5.07634	4.19226	-0.79778	0	J	30S ribosomal protein S19	107	1527	1644	421	3823	37	3738
FORC35_0422	876.264	22355.7	14647.7	12414.5	35275.3	611.968	40.2564	0.0273741	16.7161	0.555315	5.33115	-5.19104	4.06317	-0.848621	0	J	50S ribosomal protein L22	1397	16757	19627	4460	47417	375	3736
FORC35_0423	3248.51	70015.5	50615.9	43548.1	107517	2850.96	33.0975	0.0407189	15.5813	0.621977	5.04865	-4.61816	3.96174	-0.685066	0	J	30S ribosomal protein S3	5179	52481	67822	15645	144525	1747	3734
FORC35_0424	2351.55	38127.6	30309.7	23932.7	62402.2	2209.61	26.5366	0.0579531	12.8893	0.627699	4.72991	-4.10897	3.6881	-0.671855	0.001	J	50S ribosomal protein L16	3749	28579	40613	8598	83881	1354	3732
FORC35_0425	424.019	6194.28	5371.91	4662.39	9971.73	456.936	23.5172	0.0737674	12.669	0.752692	4.55564	-3.76087	3.66323	-0.409869	0.001	J	50S ribosomal protein L29	676	4643	7198	1675	13404	280	3730
FORC35_0426	1207.45	18911	14497.7	11966.3	26376.3	1227.2	21.8446	0.0648933	12.0069	0.632769	4.44921	-3.94579	3.58579	-0.660248	0.001	J	30S ribosomal protein S17	1925	14175	19426	4299	35455	752	3728
FORC35_0427	5125.23	21814.1	13552.2	9402.71	30721.6	2679.61	5.99419	0.122838	2.6442	0.431039	2.58356	-3.02517	1.40283	-1.21411	0.042	J	50S ribosomal protein L14	8171	16351	18159	3378	41296	1642	3726
FORC35_0428	3140.62	16983.2	8762.37	7434.77	20171.1	1951.77	6.42264	0.114923	2.79001	0.437771	2.68317	-3.12126	1.48027	-1.19175	0.036	J	50S ribosomal protein L24	5007	12730	11741	2671	27114	1196	3724
FORC35_0429	7853.76	44017.7	23898.9	21936.9	63758.4	6033.19	8.1182	0.137063	3.043	0.498365	3.02116	-2.86709	1.60549	-1.00473	0.02	J	50S ribosomal protein L5	12521	32994	32023	7881	85704	3697	3722
FORC35_0430	3929.7	24663.7	11166.2	13683.8	29011.3	4190.76	7.38257	0.169916	2.8415	0.554813	2.88412	-2.55711	1.50665	-0.849927	0.025	J	30S ribosomal protein S14	6265	18487	14962	4916	38997	2568	3720
FORC35_0431	2630.67	18493.5	9258.67	8225.28	24118.4	2299.37	9.16816	0.124334	3.51951	0.444767	3.19663	-3.00771	1.81537	-1.16888	0.014	J	30S ribosomal protein S8	4194	13862	12406	2955	32420	1409	3718
FORC35_0432	5818.34	35316.6	20467.4	20740	48557.5	5241.71	8.34559	0.148421	3.51774	0.587258	3.06101	-2.75224	1.81465	-0.767934	0.018	J	50S ribosomal protein L6	9276	26472	27425	7451	65271	3212	3716
FORC35_0433	2394.2	16198.8	10464.7	10446.5	22666.3	2531.1	9.46716	0.156252	4.37085	0.644896	3.24293	-2.67805	2.12791	-0.632862	0.013	J	50S ribosomal protein L18	3817	12142	14022	3753	30468	1551	3714
FORC35_0434	4965.28	30576.5	23134.7	21833.9	48960	4921.86	9.86046	0.160969	4.6593	0.714074	3.30165	-2.63515	2.22011	-0.485855	0.012	J	30S ribosomal protein S5	7916	22919	30999	7844	65812	3016	3712
FORC35_0435	435.936	2733.6	2540.42	2301.97	4772.35	469.992	10.9474	0.171932	5.82751	0.842102	3.45251	-2.54009	2.54288	-0.247933	0.009	J	50S ribosomal protein L30	695	2049	3404	827	6415	288	3710
FORC35_0436	3963.57	24822.5	23543.7	22874.9	47274.2	5127.48	11.9272	0.206566	5.94002	0.92154	3.57618	-2.27533	2.57047	-0.117881	0.007	J	50S ribosomal protein L15	6319	18606	31547	8218	63546	3142	3708
FORC35_0437	13632.6	78719.3	73991.7	56179.7	122248	18150.2	8.96735	0.230568	5.42757	0.713671	3.16468	-2.11673	2.44031	-0.486669	0.015	U	preprotein translocase, SecY subunit	21734	59005	99144	20183	164326	11122	3706
FORC35_0438	52.0615	278.829	348.525	300.62	406.19	76.7	7.80211	0.275079	6.69448	1.07815	2.96386	-1.86208	2.74297	0.108556	0.023	J	Preprotein translocase subunit secY	83	209	467	108	546	47	3704
FORC35_0439	2379.77	9749.69	11290.1	5091.05	14526.1	2480.51	6.10399	0.254419	4.7442	0.522175	2.60975	-1.97472	2.24616	-0.937394	0.041	J	30S ribosomal protein S13	3794	7308	15128	1829	19526	1520	3702
FORC35_0440	1626.45	7278.92	11146.8	4024.96	14146	1542.16	8.69744	0.211867	6.85346	0.552962	3.12059	-2.23877	2.77683	-0.854749	0.016	J	30S ribosomal protein S11	2593	5456	14936	1446	19015	945	3700
FORC35_0441	6860.82	34154.6	26749.8	17338.5	42357.5	6632.1	6.17383	0.194179	3.89892	0.507648	2.62616	-2.36454	1.96308	-0.9781	0.039	J	30S ribosomal protein S4	10938	25601	35843	6229	56937	4064	3698
FORC35_0442	19851.7	91710.9	69184	49747	118690	15607.6	5.97882	0.170183	3.48504	0.542433	2.57986	-2.55484	1.80117	-0.882484	0.043	K	DNA-directed RNA polymerase subunit alpha	31649	68743	92702	17872	159543	9564	3696
FORC35_0443	4389.47	22234.3	17438.9	10446.5	29846.7	2826.48	6.79962	0.127122	3.9729	0.469838	2.76545	-2.97571	1.99019	-1.08976	0.031	J	50S ribosomal protein L17	6998	16666	23367	3753	40120	1732	3694
FORC35_0444	388.266	913.867	477.636	656.909	561.672	972.622	1.44662	1.06429	1.23018	0.718824	0.532684	0.0898949	0.298866	-0.476289	0.661		hypothetical protein	619	685	640	236	755	596	3692
FORC35_0445	344.986	836.488	445.544	648.559	524.476	1047.69	1.52028	1.25249	1.29149	0.775335	0.604339	0.324794	0.369033	-0.367108	0.619	K	zinc-responsive transcriptional regulator	550	627	597	233	705	642	3690
FORC35_0447	9180.38	5918.12	9213.89	9639.31	5567.62	14858.6	0.60647	2.51069	1.00365	1.62878	-0.721493	1.32809	0.00525602	0.703791	0.551	M	large-conductance mechanosensitive channel	14636	4436	12346	3463	7484	9105	3688
FORC35_0448	2767.41	3351.29	3759.89	7111.88	3416.9	8916.79	1.23469	2.6607	1.35863	2.12213	0.304151	1.41181	0.442152	1.08551	0.801	P	potassium transporter peripheral membrane protein	4412	2512	5038	2555	4593	5464	3686
FORC35_0449	684.953	1566.25	1697.1	1809.28	1587.56	1569.9	2.31777	1.00233	2.47769	1.15517	1.21273	0.00336285	1.30899	0.208107	0.321	J	16S rRNA methyltransferase	1092	1174	2274	650	2134	962	3684
FORC35_0450	3077.27	5277.75	6105.53	4503.73	4187.62	5196.02	1.36082	0.984514	1.98407	0.853342	0.444479	-0.0225157	0.988464	-0.228803	0.713	J	methionyl-tRNA formyltransferase	4906	3956	8181	1618	5629	3184	3682
FORC35_0451	3502.55	5381.81	5170.41	5216.31	4598.27	7451.33	1.31284	1.38454	1.47619	0.969248	0.392689	0.469406	0.561874	-0.0450626	0.745	J	peptide deformylase	5584	4034	6928	1874	6181	4566	3680
FORC35_0452	1085.76	1869.09	1962.04	2524.65	1734.12	3270.36	1.59714	1.74971	1.80706	1.35074	0.675491	0.807112	0.853642	0.433745	0.577	L	hypothetical protein	1731	1401	2629	907	2331	2004	3678
FORC35_0453	4578.27	6435.76	7652.62	9539.1	6563.75	13621.6	1.43367	2.11655	1.67151	1.4822	0.519718	1.08171	0.74115	0.567744	0.667	S	hypothetical protein	7299	4824	10254	3427	8823	8347	3676
FORC35_0454	509.952	478.946	578.387	386.909	459.753	563.011	0.901562	1.17552	1.1342	0.807833	-0.149501	0.233299	0.181675	-0.307871	0.902	L	hypothetical protein	813	359	775	139	618	345	3674
FORC35_0455	1071.96	888.519	1136.62	726.497	836.185	1421.4	0.780049	1.59974	1.06032	0.81765	-0.358363	0.677837	0.0844972	-0.290445	0.767	J	Sua5/YciO/YrdC/YwlC family protein	1709	666	1523	261	1124	871	3672
FORC35_0456	1879.23	1978.49	2096.37	2956.09	2212.47	4205.45	1.17733	2.12559	1.11555	1.49412	0.235514	1.08786	0.157753	0.579293	0.845	E	shikimate 5-dehydrogenase	2996	1483	2809	1062	2974	2577	3670
FORC35_0457	440.327	437.589	443.305	670.827	444.13	745.785	1.00864	1.70431	1.00676	1.53301	0.012407	0.769185	0.0097253	0.616365	0.994		hypothetical protein	702	328	594	241	597	457	3668
FORC35_0458	2200.38	2050.53	2613.56	1199.69	2036.16	1857.12	0.925365	0.905678	1.18778	0.585066	-0.111906	-0.14293	0.248264	-0.77333	0.926	R	transferase	3508	1537	3502	431	2737	1138	3666
FORC35_0463	320.523	233.47	240.31	381.341	191.192	1383.86	0.596499	5.92739	0.749745	1.63337	-0.745407	2.5674	-0.415529	0.707849	0.542	E	arginine ABC transporter ATP-binding protein	511	175	322	137	257	848	3660
FORC35_0464	297.315	177.437	203.741	428.661	180.033	1357.75	0.605529	7.65204	0.685271	2.41585	-0.723733	2.93584	-0.545253	1.27253	0.556	E	amino acid ABC transporter permease	474	133	273	154	242	832	3658
FORC35_0465	781.549	338.865	620.926	712.58	437.435	1782.05	0.559702	5.25889	0.794481	2.10285	-0.837269	2.39476	-0.331915	1.07234	0.491	E	His/Glu/Gln/Arg/opine family amino ABC transporter, permease, 3-TM region	1246	254	832	256	588	1092	3656
FORC35_0466	3046.54	1139.33	2002.34	4425.79	1208.15	9595.66	0.396566	8.42219	0.65725	3.88455	-1.33437	3.07419	-0.605485	1.95775	0.276	E	bacterial extracellular solute-binding s, 3 family protein	4857	854	2683	1590	1624	5880	3654
FORC35_0467	2.509	2.6682	3.7315	0	1.4879	1.6319	0.593025	0.611611	1.48725	0	-0.753835	-0.709314	0.572643	-	0.781		hypothetical protein	4	2	5	0	2	1	3652
FORC35_0468	109.141	220.129	161.948	97.423	78.8573	62.0128	0.722527	0.281712	1.48385	0.442573	-0.468876	-1.82771	0.569341	-1.17601	0.703		hypothetical protein	174	165	217	35	106	38	3650
FORC35_0469	546.959	613.692	708.99	645.775	572.831	1080.33	1.0473	1.76038	1.29624	1.05228	0.0666776	0.815884	0.374333	0.0735184	0.957	P	multidrug transporter	872	460	950	232	770	662	3648
FORC35_0470	47.6708	65.3715	60.4508	38.9692	63.2346	40.7979	1.32648	0.624093	1.26809	0.596119	0.407608	-0.680167	0.342656	-0.746327	0.75	M	acriflavine resistance protein E	76	49	81	14	85	25	3646
FORC35_0471	11.2904	2.6682	10.4483	2.7835	2.2318	1.6319	0.197672	0.611611	0.925415	1.04321	-2.33882	-0.709314	-0.111828	0.0610333	0.134	K	transcriptional regulator	18	2	14	1	3	1	3644
FORC35_0472	0.6273	1.3341	0	0	0	0	0	0	0	0	-	-	-	-	1		hypothetical protein	1	1	0	0	0	0	3642
FORC35_0473	140.503	101.392	120.155	47.3197	147.299	83.2277	1.04837	0.820847	0.855177	0.466698	0.0681485	-0.284815	-0.225705	-1.09944	0.96	L	methyltransferase	224	76	161	17	198	51	3640
FORC35_0474	270.971	1666.31	686.601	534.435	1203.69	215.413	4.44214	0.129276	2.53386	0.32073	2.15126	-2.95148	1.34134	-1.64057	0.087	K	Fis family transcriptional regulator	432	1249	920	192	1618	132	3638
FORC35_0475	930.834	2867.01	2107.57	829.487	2312.9	438.985	2.48476	0.153116	2.26417	0.289322	1.31311	-2.7073	1.17898	-1.78925	0.283	J	tRNA-dihydrouridine synthase B	1484	2149	2824	298	3109	269	3636
FORC35_0476	1184.87	2115.9	1871.73	1645.06	2037.64	2681.24	1.71972	1.26718	1.5797	0.777473	0.782174	0.341626	0.659648	-0.363135	0.519	J	ribosomal protein L11 methyltransferase	1889	1586	2508	591	2739	1643	3634
FORC35_0477	474.199	863.171	761.232	743.198	707.484	850.228	1.49196	0.985006	1.6053	0.86101	0.577206	-0.021796	0.682845	-0.215899	0.634	H	sodium/pantothenate symporter	756	647	1020	267	951	521	3632
FORC35_0478	20.6991	48.028	46.271	25.0516	38.6847	14.6872	1.86891	0.305805	2.23541	0.521604	0.902195	-1.70932	1.16054	-0.938973	0.479	S	membrane protein	33	36	62	9	52	9	3630
FORC35_0479	1607.01	9891.11	4735.31	9970.55	10968.6	3265.46	6.82549	0.330141	2.94667	1.00803	2.77093	-1.59884	1.55908	0.0115408	0.031	I	acetyl-CoA carboxylase biotin carboxylase subunit	2562	7414	6345	3582	14744	2001	3628
FORC35_0481	0.6273	1.3341	0	0	0	0	0	0	0	0	-	-	-	-	1		hypothetical protein	1	1	0	0	0	0	3624
FORC35_0482	1033.7	1360.79	2168.76	3846.82	1641.87	3766.46	1.58834	2.76784	2.09805	2.82689	0.667518	1.46876	1.06905	1.49922	0.581	C	quinone oxidoreductase	1648	1020	2906	1382	2207	2308	3622
FORC35_0483	929.58	1000.58	1426.94	551.136	903.883	577.698	0.972357	0.577361	1.53503	0.550814	-0.0404417	-0.792455	0.618271	-0.860362	0.974		RNase E specificity factor CsrD	1482	750	1912	198	1215	354	3620
FORC35_0484	1078.86	1027.27	1344.1	1071.65	918.018	1194.56	0.850912	1.16286	1.24584	1.04321	-0.232919	0.217672	0.317123	0.0610275	0.847	T	RNase E specificity factor CsrD	1720	770	1801	385	1234	732	3618
FORC35_0485	2721.62	4764.11	3180.01	2652.69	2950.45	2397.28	1.08408	0.503196	1.16842	0.556806	0.116469	-0.990807	0.224563	-0.844752	0.923	D	rod shape-determining protein Mbl	4339	3571	4261	953	3966	1469	3616
FORC35_0486	555.74	925.874	688.094	386.909	869.662	435.721	1.56487	0.470606	1.23816	0.417885	0.646044	-1.08741	0.308194	-1.25882	0.595	M	rod shape-determining protein MreC	886	694	922	139	1169	267	3614
FORC35_0487	221.418	405.57	418.677	281.135	255.914	683.773	1.1558	1.68595	1.89089	0.693185	0.208888	0.753565	0.919066	-0.528688	0.864	M	rod shape-determining protein MreD	353	304	561	101	344	419	3612
FORC35_0488	479.844	529.643	679.884	623.507	531.915	788.215	1.10852	1.4882	1.41689	1.17722	0.148631	0.573571	0.502725	0.235387	0.902	D	Maf	765	397	911	224	715	483	3610
FORC35_0489	1870.45	3201.87	2885.22	4720.84	3282.25	3345.43	1.75479	1.04484	1.54253	1.4744	0.8113	0.0632759	0.625295	0.560129	0.503	J	ribonuclease G	2982	2400	3866	1696	4412	2050	3608
FORC35_0490	2393.57	4596.02	3897.21	6825.18	4732.93	3237.72	1.97735	0.704462	1.6282	1.48502	0.983567	-0.505405	0.703275	0.570483	0.418	S	membrane protein	3816	3445	5222	2452	6362	1984	3606
FORC35_0491	4522.45	5611.28	7331.71	10087.5	5938.1	12213.3	1.31303	2.17656	1.62118	1.79771	0.392898	1.12205	0.697045	0.846162	0.745	R	protease TldD	7210	4206	9824	3624	7982	7484	3604
FORC35_0492	1518.56	936.547	1103.04	893.508	1205.92	820.854	0.79412	0.876468	0.72637	0.954045	-0.332572	-0.190226	-0.461223	-0.0678701	0.783	K	transcriptional regulator	2421	702	1478	321	1621	503	3602
FORC35_0493	104.123	101.392	88.8104	41.7527	78.8573	50.5894	0.757348	0.498946	0.852938	0.411793	-0.400971	-1.00304	-0.229487	-1.28001	0.748		hypothetical protein	166	76	119	15	106	31	3600
FORC35_0494	250.899	244.143	280.611	119.691	185.984	203.989	0.741272	0.835534	1.11842	0.490251	-0.431925	-0.259229	0.161466	-1.02841	0.724	V	hydroxybenzoic acid transporter	400	183	376	43	250	125	3598
FORC35_0495	362.549	518.97	443.305	462.063	337.003	440.617	0.92954	0.849023	1.22275	0.890348	-0.105411	-0.236124	0.290127	-0.167559	0.931	S	p-hydroxybenzoic acid efflux pump subunit AaeB	578	389	594	166	453	270	3596
FORC35_0496	486.116	639.04	763.471	1923.41	552.001	2028.47	1.13553	3.17425	1.57055	3.00984	0.18337	1.66642	0.651271	1.58969	0.881	K	hypothetical protein	775	479	1023	691	742	1243	3594
FORC35_0497	790.958	297.507	383.601	409.177	517.78	442.249	0.654624	1.48652	0.484983	1.37535	-0.611262	0.571936	-1.04399	0.4598	0.614		putative putative protein yhcn	1261	223	514	147	696	271	3592
FORC35_0498	2184.7	2856.33	2848.65	2674.96	2771.16	2003.99	1.26844	0.701596	1.30391	0.9365	0.343057	-0.511288	0.382842	-0.0946489	0.776	K	arginine repressor	3483	2141	3817	961	3725	1228	3590
FORC35_0499	25015.9	42659.6	27046.1	18293.3	50424.8	14840.6	2.01571	0.347885	1.08116	0.42882	1.01129	-1.52332	0.112579	-1.22156	0.405	C	malate dehydrogenase	39882	31976	36240	6572	67781	9094	3588
FORC35_0500	705.653	820.479	841.086	498.249	793.781	732.73	1.12489	0.893052	1.19193	0.607266	0.169782	-0.163185	0.253296	-0.719599	0.889	O	protease degS	1125	615	1127	179	1067	449	3586
FORC35_0501	2837.04	2634.87	2305.34	3788.36	2217.68	3662.02	0.781687	1.38983	0.812587	1.43778	-0.355336	0.474906	-0.299406	0.523842	0.768	O	serine endoprotease DegQ	4523	1975	3089	1361	2981	2244	3584
FORC35_0502	3125.57	3854.25	3710.63	1592.17	4590.83	1496.47	1.4688	0.388264	1.18719	0.413095	0.554637	-1.36489	0.247545	-1.27546	0.646	S	hypothetical protein	4983	2889	4972	572	6171	917	3582
FORC35_0503	551.35	865.839	594.059	464.847	581.759	367.181	1.05515	0.424075	1.07746	0.536875	0.0774527	-1.23761	0.107639	-0.897343	0.949	R	hypothetical protein	879	649	796	167	782	225	3580
FORC35_0504	2031.65	24807.8	13351.4	11006	29095.4	1737.99	14.321	0.0700582	6.5717	0.443651	3.84006	-3.8353	2.71627	-1.1725	0.004	J	50S ribosomal protein L13	3239	18595	17890	3954	39110	1065	3578
FORC35_0505	1989.63	25552.3	14286.5	11050.6	31286.3	1582.96	15.7247	0.0619499	7.18051	0.432469	3.97496	-4.01276	2.84409	-1.20933	0.003	J	30S ribosomal protein S9	3172	19153	19143	3970	42055	970	3576
FORC35_0506	3797.35	7053.45	6574.95	5731.26	6092.1	5122.58	1.6043	0.726252	1.73146	0.812546	0.681946	-0.461458	0.791987	-0.299478	0.573	O	stringent starvation protein A	6054	5287	8810	2059	8189	3139	3574
FORC35_0507	1702.35	3236.56	3107.62	2803	3182.56	2051.32	1.86951	0.633796	1.82549	0.866044	0.902663	-0.657908	0.868283	-0.207488	0.457	R	peptidase	2714	2426	4164	1007	4278	1257	3572
FORC35_0508	141.131	113.4	154.485	52.8868	130.933	110.97	0.927743	0.978578	1.09463	0.466376	-0.108202	-0.0312407	0.13044	-1.10043	0.933	C	C4-dicarboxylate ABC transporter	225	85	207	19	176	68	3570
FORC35_0509	1223.13	1679.65	1445.59	704.229	2315.13	693.564	1.89279	0.412922	1.18188	0.419272	0.920515	-1.27606	0.241083	-1.25404	0.449	K	transcriptional regulator	1950	1259	1937	253	3112	425	3568
FORC35_0510	112.277	382.89	268.67	403.61	274.513	525.477	2.44495	1.3724	2.39292	1.05411	1.28981	0.456696	1.25877	0.0760298	0.295	E	N-acetylneuraminate lyase	179	287	360	145	369	322	3566
FORC35_0511	252.153	280.164	406.737	559.486	226.901	1036.27	0.899853	3.69879	1.61305	1.997	-0.152239	1.88705	0.689794	0.997834	0.902	G	putative sialic acid transporter	402	210	545	201	305	635	3564
FORC35_0512	226.436	285.5	312.702	551.136	280.464	760.473	1.2386	2.66365	1.38097	1.93042	0.308713	1.41341	0.465685	0.948917	0.799	G	N-acetylmannosamine-6-phosphate 2-epimerase	361	214	419	198	377	466	3562
FORC35_0513	821.693	727.091	875.417	1455.78	578.039	2079.06	0.703473	2.85942	1.06538	2.00219	-0.507433	1.51572	0.0913699	1.00158	0.675	G	putative NAGC-like transcriptional regulator	1310	545	1173	523	777	1274	3560
FORC35_0514	792.84	992.58	845.564	1817.63	578.039	2462.56	0.729074	2.48097	1.0665	1.83122	-0.455863	1.3109	0.0928849	0.872808	0.706	G	hypothetical protein	1264	744	1133	653	777	1509	3558
FORC35_0515	339.34	381.556	633.614	192.062	378.664	272.53	1.11588	0.714259	1.86719	0.503366	0.158185	-0.485481	0.90087	-0.990319	0.899	S	hypothetical protein	541	286	849	69	509	167	3556
FORC35_0516	21036	30195	40708.7	28060.6	36981.8	1649.87	1.75803	0.0546405	1.9352	0.929314	0.813959	-4.19389	0.95248	-0.105762	0.502	E	glutamate synthase [NADPH] small chain	33537	22633	54547	10081	49711	1011	3554
FORC35_0517	62985.6	76559.4	60597	64257.4	79805.8	4691.76	1.26705	0.0612826	0.962078	0.839315	0.341472	-4.02838	-0.055775	-0.252716	0.777	E	glutamate synthase subunit alpha	100416	57386	81196	23085	107275	2875	3552
FORC35_0520	101.614	94.722	192.547	116.908	208.302	88.1234	2.04994	0.930337	1.89488	1.23422	1.03558	-0.104174	0.92211	0.303597	0.402	R	hypothetical protein	162	71	258	42	280	54	3550
FORC35_0521	3417.24	3339.28	4010.65	4537.13	5096.71	2877.07	1.49147	0.861582	1.17365	1.35871	0.576735	-0.214939	0.231003	0.442241	0.633	T	aerobic respiration control sensor protein ArcB	5448	2503	5374	1630	6851	1763	3548
FORC35_0522	786.567	1394.15	1447.83	1945.68	2341.91	662.558	2.97738	0.475242	1.8407	1.3956	1.57405	-1.07326	0.880253	0.480889	0.202	Q	isoprenoid biosynthesis protein	1254	1045	1940	699	3148	406	3546
FORC35_0523	775.904	1143.33	546.296	784.951	703.02	509.158	0.906066	0.445327	0.704076	0.686546	-0.142312	-1.16706	-0.506196	-0.542572	0.907	M	monofunctional biosynthetic peptidoglycan transglycosylase	1237	857	732	282	945	312	3544
FORC35_0524	9370.44	24541	6901.09	15793.7	9399.64	15243.7	1.00312	0.621153	0.736474	0.643562	0.0044894	-0.686978	-0.441293	-0.635848	0.997	T	hypothetical protein	14939	18395	9247	5674	12635	9341	3542
FORC35_0525	336.204	297.507	391.064	186.495	290.879	215.413	0.865186	0.72406	1.16317	0.626861	-0.208917	-0.465819	0.218067	-0.673783	0.865	G	phosphohistidinoprotein-hexose phosphotransferase	536	223	524	67	391	132	3540
FORC35_0526	4351.84	5057.62	4668.89	3930.32	4250.86	4061.84	0.976796	0.803113	1.07285	0.777109	-0.0338715	-0.316326	0.101454	-0.363811	0.978	R	hypothetical protein	6938	3791	6256	1412	5714	2489	3538
FORC35_0527	2557.91	3548.74	3051.64	2441.14	2817.29	2469.09	1.1014	0.695765	1.19302	0.68789	0.139341	-0.523328	0.25462	-0.53975	0.908	G	PTS sugar transporter subunit IIA	4078	2660	4089	877	3787	1513	3536
FORC35_0528	8206.27	11445.3	10341.6	16074.8	6085.4	17725.9	0.741556	1.54874	1.2602	1.40448	-0.431373	0.631095	0.333655	0.490039	0.721	J	ribosome hibernation promoting factor HPF	13083	8579	13857	5775	8180	10862	3534
FORC35_0529	11054	16109.4	12370	20058	9913.7	19762.5	0.896846	1.22677	1.11906	1.24511	-0.157068	0.294862	0.162283	0.316275	0.896	K	RNA polymerase sigma-54 factor	17623	12075	16575	7206	13326	12110	3532
FORC35_0530	2917.32	3632.79	3162.1	4194.76	3564.95	4316.42	1.22199	1.18818	1.0839	1.15469	0.289234	0.248757	0.116236	0.20751	0.81	R	lipopolysaccharide ABC transporter ATP-binding protein	4651	2723	4237	1507	4792	2645	3530
FORC35_0531	3317.51	3794.22	3751.68	5110.53	3219.76	5228.66	0.970535	1.37806	1.13087	1.34693	-0.0431472	0.462639	0.177436	0.429672	0.972	S	sugar ABC transporter substrate-binding protein	5289	2844	5027	1836	4328	3204	3528
FORC35_0532	2479.51	2688.24	2834.47	2633.2	1914.89	4056.94	0.772288	1.50915	1.14316	0.979529	-0.372789	0.593733	0.193026	-0.0298402	0.757	S	sugar ABC transporter substrate-binding protein	3953	2015	3798	946	2574	2486	3526
FORC35_0533	1659.07	1790.38	1888.15	1547.63	1259.49	2132.91	0.759152	1.19132	1.13808	0.864417	-0.397538	0.252561	0.186603	-0.2102	0.742	R	3-deoxy-D-manno-octulosonate 8-phosphate phosphatase	2645	1342	2530	556	1693	1307	3524
FORC35_0534	1179.22	1222.05	1579.18	1514.23	1396.37	1522.58	1.18414	1.24592	1.33917	1.23909	0.243843	0.317216	0.421341	0.309287	0.84	M	D-arabinose 5-phosphate isomerase	1880	916	2116	544	1877	933	3522
FORC35_0535	683.699	825.815	753.769	651.342	885.285	713.147	1.29485	0.863567	1.10249	0.788726	0.372781	-0.21162	0.140761	-0.342403	0.758	P	sodium	1090	619	1010	234	1190	437	3520
FORC35_0536	703.771	989.911	820.936	757.116	931.409	758.841	1.32346	0.766575	1.16648	0.764832	0.404309	-0.383502	0.222165	-0.386785	0.738	Q	organic solvent ABC transporter ATP-binding protein	1122	742	1100	272	1252	465	3518
FORC35_0537	757.714	936.547	731.38	709.796	931.409	574.434	1.22924	0.613354	0.965245	0.757887	0.297761	-0.705209	-0.0510332	-0.399946	0.806	Q	ABC transporter permease	1208	702	980	255	1252	352	3516
FORC35_0538	691.226	952.556	703.02	837.838	945.544	620.128	1.36792	0.651015	1.01706	0.879568	0.451987	-0.619238	0.0244085	-0.185133	0.709	Q	phospholipid ABC transporter substrate-binding protein	1102	714	942	301	1271	380	3514
FORC35_0539	4089.65	4620.03	4224.09	5914.97	4288.05	4659.12	1.04851	1.00846	1.03287	1.28029	0.0683457	0.0121548	0.0466637	0.356468	0.955	Q	organic solvent ABC transporter substrate-binding protein	6520	3463	5660	2125	5764	2855	3512
FORC35_0540	901.981	1190.03	995.572	1352.79	985.716	951.407	1.09284	0.799483	1.10376	1.13677	0.128076	-0.322861	0.142429	0.18494	0.916	R	phospholipid ABC transporter substrate-binding protein	1438	892	1334	486	1325	583	3510
FORC35_0541	232.708	450.93	353.003	97.423	336.26	78.332	1.44498	0.173712	1.51693	0.216049	0.531051	-2.52523	0.601155	-2.21057	0.664	K	hypothetical protein	371	338	473	35	452	48	3508
FORC35_0542	1975.2	4527.98	2168.02	2160.01	3492.04	985.677	1.76794	0.217686	1.09762	0.477036	0.822071	-2.19968	0.134378	-1.06783	0.498	M	UDP-N-acetylglucosamine 1-carboxyvinyltransferase	3149	3394	2905	776	4694	604	3506
FORC35_0543	77.1513	85.3832	90.303	100.207	69.1861	96.283	0.896759	1.12766	1.17047	1.17361	-0.157208	0.173329	0.227083	0.230952	0.903	K	transcriptional regulator	123	64	121	36	93	59	3504
FORC35_0544	2683.99	2855	3564.36	1675.68	3454.84	3063.11	1.2872	1.07289	1.32801	0.586927	0.364242	0.101504	0.409263	-0.768748	0.763	H	octaprenyl diphosphate synthase	4279	2140	4776	602	4644	1877	3502
FORC35_0545	1776.36	7829.9	4402.46	3635.27	7655.11	1529.1	4.30943	0.19529	2.47835	0.46428	2.1075	-2.35631	1.30938	-1.10693	0.092	J	50S ribosomal protein L21	2832	5869	5899	1306	10290	937	3500
FORC35_0546	1457.09	5763.36	4127.82	3646.4	6888.86	1209.25	4.7278	0.209817	2.83291	0.632687	2.24117	-2.2528	1.50228	-0.660437	0.075	J	50S ribosomal protein L27	2323	4320	5531	1310	9260	741	3498
FORC35_0547	247.762	617.694	428.379	545.569	540.842	683.773	2.18291	1.10698	1.72899	0.883235	1.12625	0.146625	0.789932	-0.179131	0.358	R	membrane protein	395	463	574	196	727	419	3496
FORC35_0548	348.122	769.783	782.128	890.725	892.724	1602.54	2.5644	2.08181	2.24671	1.15711	1.35862	1.05784	1.16781	0.210528	0.269	R	GTPase CgtA	555	577	1048	320	1200	982	3494
FORC35_0549	1028.06	956.558	998.557	559.486	800.476	523.845	0.77863	0.547635	0.971305	0.584895	-0.36099	-0.868713	-0.0420041	-0.77375	0.765	M	D-alanyl-D-alanine carboxypeptidase	1639	717	1338	201	1076	321	3492
FORC35_0550	746.423	1694.32	1097.07	398.043	779.646	533.636	1.04451	0.314956	1.46977	0.234927	0.0628244	-1.66678	0.555588	-2.08971	0.959	K	transcription elongation factor GreA	1190	1270	1470	143	1048	327	3490
FORC35_0551	1429.5	1515.55	1659.04	637.425	1084.66	902.449	0.758771	0.595459	1.16058	0.420589	-0.398263	-0.747925	0.214841	-1.24952	0.742	J	RNA-binding protein YhbY	2279	1136	2223	229	1458	553	3488
FORC35_0552	5492.17	8127.41	6259.27	6237.86	5317.66	10134.2	0.968225	1.24692	1.13967	0.767508	-0.046585	0.318364	0.188617	-0.381746	0.969	J	23S rRNA methyltransferase	8756	6092	8387	2241	7148	6210	3486
FORC35_0553	24680.9	34308	26251.3	39999.1	25847.3	31845.2	1.04726	0.928214	1.06363	1.16588	0.0666209	-0.10747	0.0889938	0.221421	0.956	O	ATP-dependent metalloprotease	39348	25716	35175	14370	34744	19514	3484
FORC35_0554	501.797	877.846	511.966	729.281	941.08	564.643	1.87542	0.643214	1.02026	0.830762	0.907213	-0.636629	0.0289422	-0.267493	0.456	H	dihydropteroate synthase	800	658	686	262	1265	346	3482
FORC35_0555	3983.64	7668.48	4973.38	6772.29	8047.16	3164.28	2.02005	0.412635	1.24845	0.883134	1.01439	-1.27706	0.320138	-0.179296	0.404	G	phosphoglucosamine mutase	6351	5748	6664	2433	10817	1939	3480
FORC35_0556	1406.29	1907.78	2436.69	637.425	1751.97	585.858	1.24581	0.307089	1.73271	0.334119	0.317088	-1.70327	0.79303	-1.58157	0.793	U	preprotein translocase subunit SecG	2242	1430	3265	229	2355	359	3478
FORC35_0557	291.67	222.797	203.741	409.177	216.486	469.992	0.742229	2.10951	0.698535	1.83655	-0.430064	1.07691	-0.517596	0.876996	0.725	R	phosphate starvation-inducible protein PsiE	465	167	273	147	291	288	3474
FORC35_0558	29028.3	17580.9	24707.9	20709.3	39582.6	4115.69	1.36359	0.2341	0.851166	1.17794	0.447406	-2.0948	-0.232488	0.236271	0.711	E	argininosuccinate synthase	46279	13178	33107	7440	53207	2522	3472
FORC35_0559	979.132	1616.94	1394.1	1391.76	1656	1356.12	1.6913	0.838694	1.42381	0.860733	0.75813	-0.253783	0.509758	-0.216362	0.532	S	ribosome maturation protein RimP	1561	1212	1868	500	2226	831	3468
FORC35_0560	5694.15	12303.2	8467.58	12222.4	14731.4	8900.47	2.58712	0.723428	1.48707	0.993435	1.37135	-0.467079	0.572471	-0.00950257	0.263	K	peptidase M54	9078	9222	11346	4391	19802	5454	3466
FORC35_0561	11617.2	26202	22658.6	39319.9	48285.2	18385.2	4.15634	0.701671	1.95043	1.50065	2.05531	-0.511133	0.963791	0.585586	0.1	J	translation initiation factor IF-2	18521	19640	30361	14126	64905	11266	3464
FORC35_0562	764.614	1611.61	1388.13	2210.11	2446.81	1232.1	3.20006	0.764514	1.81546	1.37137	1.6781	-0.387386	0.860338	0.455618	0.175	J	ribosome-binding factor A	1219	1208	1860	794	3289	755	3462
FORC35_0563	1161.03	2979.07	2688.94	2964.44	4623.57	1817.95	3.98229	0.610242	2.31599	0.995089	1.9936	-0.712548	1.21163	-0.00710227	0.11	J	tRNA pseudouridine synthase B	1851	2233	3603	1065	6215	1114	3460
FORC35_0564	1582.54	8966.57	5653.26	4342.28	14647.4	1339.8	9.25559	0.149422	3.57227	0.484275	3.21033	-2.74254	1.83684	-1.0461	0.014	J	30S ribosomal protein S15	2523	6721	7575	1560	19689	821	3458
FORC35_0565	12553.1	25780.4	19454.7	27275.7	23132.7	26450.1	1.84279	1.02598	1.54979	1.058	0.881892	0.0369988	0.632076	0.0813402	0.467	J	polynucleotide phosphorylase/polyadenylase	20013	19324	26068	9799	31095	16208	3456
FORC35_0566	11873.8	18999.1	19531.6	13928.7	15883.1	11761.2	1.33766	0.619041	1.64493	0.733125	0.419709	-0.691893	0.718028	-0.447869	0.728	R	lipoprotein NlpI	18930	14241	26171	5004	21350	7207	3454
FORC35_0567	9339.08	7593.77	7076.47	1631.14	4356.49	1943.61	0.46648	0.255948	0.757727	0.2148	-1.10011	-1.96608	-0.40025	-2.21894	0.366	L	RNA helicase	14889	5692	9482	586	5856	1191	3452
FORC35_0568	3279.87	4139.75	2066.52	4150.22	5874.13	2051.32	1.79096	0.495517	0.630061	1.00253	0.840734	-1.01299	-0.666436	0.00364413	0.488	E	tryptophan permease	5229	3103	2769	1491	7896	1257	3450
FORC35_0569	2545.99	1754.36	1872.48	3896.92	2010.12	5124.21	0.789522	2.92085	0.735461	2.22128	-0.340949	1.54639	-0.443278	1.15139	0.778	C	hypothetical protein	4059	1315	2509	1400	2702	3140	3448
FORC35_0570	94.7142	82.715	152.246	534.435	226.901	84.8596	2.39564	1.02593	1.60743	6.46116	1.26041	0.0369289	0.684755	2.69179	0.31	O	protease	151	62	204	192	305	52	3446
FORC35_0571	37.6348	57.3668	225.384	498.249	386.103	68.5405	10.2592	1.19478	5.98872	8.68532	3.35885	0.256741	2.58225	3.11858	0.012	O	protease	60	43	302	179	519	42	3444
FORC35_0573	919.544	1222.05	1276.18	2816.92	2802.41	1331.64	3.04761	1.08968	1.38784	2.30508	1.60768	0.123908	0.472845	1.20482	0.192	I	hypothetical protein	1466	916	1710	1012	3767	816	3442
FORC35_0574	541.314	776.453	788.845	1706.29	1571.94	739.258	2.90393	0.952096	1.45728	2.19755	1.53801	-0.0708218	0.543276	1.1359	0.212	R	N-acetyltransferase	863	582	1057	613	2113	453	3440
FORC35_0575	117.295	228.133	194.786	116.908	303.526	122.394	2.58771	0.536501	1.66065	0.512453	1.37168	-0.898347	0.731746	-0.964508	0.268	L	GIY-YIG nuclease	187	171	261	42	408	75	3438
FORC35_0576	137.367	125.406	150.007	114.124	101.919	212.149	0.74195	1.69169	1.09202	0.910033	-0.430607	0.758466	0.126998	-0.136009	0.728	S	hypothetical protein	219	94	201	41	137	130	3436
FORC35_0577	1181.11	643.042	971.69	1341.65	325.844	2777.52	0.275881	4.31934	0.822695	2.08642	-1.85788	2.11081	-0.28157	1.06103	0.135	R	general stress protein	1883	482	1302	482	438	1702	3434
FORC35_0579	214.518	265.488	436.589	526.084	665.08	421.034	3.10034	1.58589	2.0352	1.98157	1.63243	0.665289	1.02517	0.986645	0.187	R	membrane protein	342	199	585	189	894	258	3430
FORC35_0580	1232.54	2082.55	1770.24	1820.42	2434.16	891.026	1.97492	0.427853	1.43625	0.87413	0.981791	-1.22481	0.522308	-0.19408	0.419	R	hypothetical protein	1965	1561	2372	654	3272	546	3428
FORC35_0581	845.529	1446.18	1053.04	1007.63	1393.39	636.447	1.64796	0.440089	1.24542	0.696756	0.720678	-1.18413	0.316631	-0.521276	0.552	G	DnaA initiator-associating protein DiaA	1348	1084	1411	362	1873	390	3426
FORC35_0582	284.77	700.409	447.783	598.456	760.303	195.83	2.66989	0.279594	1.57244	0.854437	1.41678	-1.8386	0.653004	-0.226953	0.25	L	hypothetical protein	454	525	600	215	1022	120	3424
FORC35_0583	2589.27	4279.83	3705.41	3214.96	3826.81	2188.4	1.47795	0.511328	1.43106	0.751188	0.563595	-0.967678	0.517084	-0.412754	0.641	R	penicillin-binding protein activator LpoA	4128	3208	4965	1155	5144	1341	3422
FORC35_0584	582.712	717.752	767.948	573.404	575.063	629.919	0.986874	0.877628	1.31789	0.798888	-0.0190628	-0.188319	0.398226	-0.323934	0.989	R	16S rRNA methyltransferase	929	538	1029	206	773	386	3420
FORC35_0585	424.019	390.895	467.187	509.383	422.556	523.845	0.996551	1.34012	1.10181	1.30312	-0.004985	0.422359	0.139873	0.38197	0.998	N	fimbrial protein	676	293	626	183	568	321	3418
FORC35_0586	741.405	612.357	620.926	562.27	570.6	768.632	0.769619	1.2552	0.837499	0.918205	-0.377784	0.327919	-0.255841	-0.123111	0.755	M	membrane protein	1182	459	832	202	767	471	3416
FORC35_0587	67.1154	17.3435	31.3448	13.9176	20.0863	17.9511	0.29928	1.03503	0.467028	0.802468	-1.74043	0.0496772	-1.09842	-0.317485	0.175	N	fimbrial protein	107	13	42	5	27	11	3414
FORC35_0588	238.981	168.098	150.007	105.774	172.593	112.602	0.722206	0.66986	0.627696	0.629237	-0.469519	-0.578068	-0.671862	-0.668324	0.702	N	fimbrial protein	381	126	201	38	232	69	3412
FORC35_0589	106.005	73.3762	75.3769	19.4846	54.3074	34.2702	0.512311	0.467048	0.711071	0.265544	-0.964908	-1.09836	-0.491934	-1.91298	0.445	G	galactosamine-6-phosphate isomerase	169	55	101	7	73	21	3410
FORC35_0590	119.804	61.3692	52.9877	80.7219	68.4422	106.075	0.571284	1.72846	0.442286	1.31535	-0.807719	0.789491	-1.17695	0.395445	0.516	G	PTS N-acetylgalactosamine transporter subunit IID	191	46	71	29	92	65	3408
FORC35_0591	122.94	32.0187	35.8227	22.2681	54.3074	32.6383	0.441738	1.01935	0.291383	0.695472	-1.17874	0.0276512	-1.77901	-0.523936	0.349	G	PTS N-acetylgalactosamine transporter subunit IIC	196	24	48	8	73	20	3406
FORC35_0592	54.5705	6.6706	9.702	0	27.5257	8.1596	0.504406	1.22322	0.177788	0	-0.987342	0.290682	-2.49177	-	0.435	G	PTS system N-acetylgalactosamine-specific EIIB component	87	5	13	0	37	5	3404
FORC35_0593	89.6963	38.6893	44.032	44.5362	54.3074	86.4915	0.605459	2.23554	0.490901	1.15112	-0.7239	1.16062	-1.0265	0.203044	0.57	G	tagatose-bisphosphate aldolase	143	29	59	16	73	53	3402
FORC35_0594	43.28	66.7056	64.9286	47.3197	77.3694	127.289	1.78765	1.90823	1.5002	0.709381	0.838063	0.932232	0.585154	-0.495367	0.503	M	aldose isomerase	69	50	87	17	104	78	3400
FORC35_0595	140.503	116.068	140.305	247.733	152.507	329.647	1.08543	2.84012	0.998592	2.13438	0.118272	1.50595	-0.00203245	1.09382	0.929	G	N-acetylglucosamine-6-phosphate deacetylase	224	87	188	89	205	202	3398
FORC35_0596	61.4702	68.0397	59.7045	119.691	78.8573	164.823	1.28285	2.42246	0.971276	1.75914	0.359357	1.27647	-0.0420475	0.814867	0.781	G	PTS N-acetylgalactosamine transporter subunit IIA	98	51	80	43	106	101	3396
FORC35_0597	142.385	93.3879	140.305	219.898	176.313	298.641	1.23828	3.19785	0.985395	2.35467	0.308342	1.6771	-0.0212256	1.23552	0.802	G	PTS N-acetylgalactosamine transporter subunit IID	227	70	188	79	237	183	3394
FORC35_0598	31.9896	46.6939	58.2118	58.4538	50.5877	145.24	1.58138	3.11048	1.81971	1.25185	0.661184	1.63714	0.863709	0.324063	0.611	G	PTS system N-acetylgalactosamine-specific transp orter subunit IIC	51	35	78	21	68	89	3392
FORC35_0599	21.9536	45.3598	35.0764	58.4538	38.6847	104.443	1.76211	2.30254	1.59775	1.28867	0.817306	1.20322	0.676043	0.365883	0.525	G	PTS N-acetylgalactosamine transporter subunit IIB	35	34	47	21	52	64	3390
FORC35_0600	105.377	145.418	125.379	197.63	145.812	248.051	1.38371	1.70578	1.18981	1.35904	0.46854	0.77043	0.250734	0.44259	0.705	G	tagatose-bisphosphate aldolase	168	109	168	71	196	152	3388
FORC35_0601	650.455	773.785	656.003	467.63	1057.13	566.275	1.62522	0.731824	1.00853	0.604341	0.700638	-0.450431	0.0122527	-0.726564	0.563	K	DeoR family transcriptional regulator	1037	580	879	168	1421	347	3386
FORC35_0602	1261.39	683.065	922.434	695.879	1008.03	1307.16	0.799144	1.91367	0.731282	1.01876	-0.323473	0.936345	-0.451501	0.0268119	0.789		toxin YhaV	2011	512	1236	250	1355	801	3384
FORC35_0603	28.2261	18.6776	26.1207	13.9176	31.9893	52.2213	1.13332	2.79593	0.925409	0.745149	0.18056	1.48333	-0.111836	-0.424399	0.895		antitoxin PrlF	45	14	35	5	43	32	3382
FORC35_0604	180.02	249.479	291.059	740.415	257.402	1395.29	1.42985	5.59281	1.61682	2.96784	0.515869	2.48357	0.693157	1.56942	0.674	G	galactarate dehydrogenase	287	187	390	266	346	855	3380
FORC35_0605	0	0	0	0	0	0	-	-	-	-	-	-	-	-	1		hypothetical protein	0	0	0	0	0	0	3378
FORC35_0606	0	0	0	5.567	0	0	-	-	-	-	-	-	-	-	1		hypothetical protein	0	0	0	2	0	0	3376
FORC35_0607	50.1797	33.3528	41.7931	27.8351	20.0863	71.8043	0.400287	2.15287	0.832869	0.834566	-1.32089	1.10626	-0.263839	-0.260903	0.297	G	galactonate transporter	80	25	56	10	27	44	3374
FORC35_0608	79.6603	74.7103	73.8843	77.9384	56.5392	117.498	0.709754	1.57271	0.927492	1.04321	-0.494609	0.653256	-0.108593	0.0610272	0.695	G	alpha-dehydro-beta-deoxy-D-glucarate aldolase	127	56	99	28	76	72	3372
FORC35_0609	284.77	234.804	341.062	411.96	297.575	558.115	1.04497	2.37694	1.19767	1.75449	0.0634547	1.24911	0.260236	0.811049	0.96	I	tartronate semialdehyde reductase	454	176	457	148	400	342	3370
FORC35_0610	411.474	312.182	423.155	912.993	349.65	1008.52	0.849751	3.23056	1.02839	2.92455	-0.234888	1.69178	0.0403867	1.54821	0.848	G	glycerate kinase	656	234	567	328	470	618	3368
FORC35_0611	10.6632	16.0094	5.2241	8.3505	13.3909	4.8958	1.25581	0.305808	0.489919	0.5216	0.328612	-1.7093	-1.02939	-0.938985	0.854		hypothetical protein	17	12	7	3	18	3	3366
FORC35_0612	14.4267	18.6776	21.6429	2.7835	6.6954	4.8958	0.464098	0.262121	1.5002	0.149029	-1.1075	-1.93169	0.585152	-2.74634	0.47		hypothetical protein	23	14	29	1	9	3	3364
FORC35_0613	26.9716	10.6729	17.165	8.3505	6.6954	6.5277	0.248239	0.611614	0.63641	0.782402	-2.0102	-0.709306	-0.651971	-0.354018	0.152		hypothetical protein	43	8	23	3	9	4	3362
FORC35_0615	47.6708	20.0117	41.7931	236.599	41.6605	79.9639	0.873921	3.99586	0.876702	11.823	-0.194426	1.99851	-0.189841	3.56353	0.886	K	transcriptional regulator	76	15	56	85	56	49	3360
FORC35_0616	75.8968	17.3435	22.3892	13.9176	24.5499	48.9575	0.323464	2.82282	0.294995	0.802468	-1.62832	1.49713	-1.76124	-0.317485	0.205	E	threonine dehydratase	121	13	30	5	33	30	3358
FORC35_0617	427.155	262.82	226.877	141.959	430.739	225.204	1.00839	0.856877	0.531135	0.540138	0.0120556	-0.222841	-0.91285	-0.888599	0.992	E	serine/threonine transporter	681	197	304	51	579	138	3356
FORC35_0618	175.629	58.7009	53.734	33.4022	79.6012	42.4298	0.453235	0.722813	0.305952	0.569024	-1.14167	-0.468305	-1.70862	-0.813439	0.359	C	propionate/acetate kinase	280	44	72	12	107	26	3354
FORC35_0619	491.134	198.783	166.426	114.124	287.16	184.406	0.584687	0.927679	0.338861	0.574115	-0.774264	-0.108303	-1.56123	-0.800589	0.524	C	keto-acid formate acetyltransferase	783	149	223	41	386	113	3352
FORC35_0620	98.4777	44.0257	62.6897	66.8043	81.0891	83.2277	0.823426	1.89043	0.636588	1.51739	-0.280289	0.918718	-0.651569	0.601595	0.828	J	endoribonuclease L-PSP	157	33	84	24	109	51	3350
FORC35_0621	469.808	245.477	288.82	311.754	258.89	442.249	0.551055	1.80159	0.614763	1.26999	-0.859731	0.849274	-0.701898	0.344821	0.481	E	L-serine dehydratase	749	184	387	112	348	271	3348
FORC35_0622	70.2516	88.0514	149.261	94.6395	159.946	66.9085	2.27677	0.75988	2.12466	1.07482	1.18699	-0.396156	1.08724	0.104097	0.34	E	membrane protein	112	66	200	34	215	41	3346
FORC35_0623	167.475	132.077	134.335	194.846	189.704	138.713	1.13273	1.05024	0.80212	1.47524	0.179804	0.0707206	-0.31811	0.560954	0.884	S	membrane protein	267	99	180	70	255	85	3344
FORC35_0624	30.1078	92.0537	64.9286	38.9692	178.545	31.0064	5.93019	0.336829	2.15654	0.423331	2.56808	-1.56991	1.10872	-1.24014	0.048		hypothetical protein	48	69	87	14	240	19	3342
FORC35_0625	100.359	192.112	149.261	164.227	411.397	208.885	4.09923	1.08731	1.48726	0.854851	2.03535	0.120761	0.572661	-0.226254	0.106	R	pirin	160	144	200	59	553	128	3340
FORC35_0626	575.812	553.657	514.205	256.083	560.184	295.377	0.972859	0.533502	0.893007	0.462531	-0.0396968	-0.906435	-0.163256	-1.11238	0.975	K	LysR family transcripitonal regulator	918	415	689	92	753	181	3338
FORC35_0627	324.286	56.0327	85.8251	44.5362	81.0891	78.332	0.250054	1.39797	0.264658	0.794825	-1.99969	0.483333	-1.9178	-0.331291	0.113	S	membrane protein	517	42	115	16	109	48	3336
FORC35_0628	2424.31	1730.34	1916.51	4339.5	2303.23	3190.39	0.950056	1.84379	0.79054	2.50788	-0.0739156	0.882677	-0.33909	1.32647	0.951	S	membrane protein	3865	1297	2568	1559	3096	1955	3334
FORC35_0629	4218.86	7402.99	9016.86	13480.6	4867.58	9835.56	1.15377	1.32859	2.13727	1.82096	0.206351	0.409899	1.09577	0.864701	0.864	O	hypothetical protein	6726	5549	12082	4843	6543	6027	3332
FORC35_0630	404.574	190.778	323.897	172.578	213.51	197.462	0.52774	1.03503	0.800587	0.904601	-0.922101	0.0496788	-0.320871	-0.144647	0.452	S	inner membrane protein yqjF	645	143	434	62	287	121	3330
FORC35_0631	12154.8	17893.1	15636.6	40903.7	8569.41	21973.7	0.705023	1.22806	1.28646	2.286	-0.504257	0.296376	0.363402	1.19283	0.676		membrane protein	19378	13412	20952	14695	11519	13465	3328
FORC35_0632	20355.4	21261.7	26116.2	42796.5	14841.5	24930.8	0.72912	1.17256	1.28301	2.01284	-0.455771	0.229668	0.359534	1.00923	0.706	S	membrane protein	32452	15937	34994	15375	19950	15277	3326
FORC35_0633	13146.5	12967.6	17006.1	26351.5	9163.81	16198.4	0.697056	1.24915	1.29358	2.03211	-0.520655	0.320943	0.371375	1.02298	0.666	S	membrane protein	20959	9720	22787	9467	12318	9926	3324
FORC35_0634	12354.2	15191.5	12009.5	16055.3	8238.36	10917.5	0.666844	0.718658	0.972099	1.05686	-0.584579	-0.476623	-0.0408254	0.0797829	0.628	J	hypothetical protein	19696	11387	16092	5768	11074	6690	3322
FORC35_0635	597.766	465.605	460.471	567.837	504.389	484.679	0.84379	1.04097	0.770319	1.21957	-0.245044	0.0579221	-0.376472	0.286369	0.84	L	inner membrane YqjA domain protein	953	349	617	204	678	297	3320
FORC35_0636	1467.13	1242.06	1011.24	924.127	1043	1434.45	0.710911	1.1549	0.689267	0.744028	-0.492258	0.207768	-0.536865	-0.42657	0.684	S	inner membrane YqjA domain protein	2339	931	1355	332	1402	879	3318
FORC35_0637	0.6273	1.3341	0.7463	0	2.9758	0	4.74382	0	1.1897	0	2.24605	-	0.2506	-	0.52		hypothetical protein	1	1	1	0	4	0	3316
FORC35_0638	2179.05	4125.07	2771.78	3162.07	5257.4	2571.9	2.4127	0.623479	1.27201	0.766549	1.27065	-0.681586	0.34711	-0.38355	0.299	K	negative regulator of exu regulon, exuT, uxaAC, and uxuB	3474	3092	3714	1136	7067	1576	3314
FORC35_0639	11.9177	5.3365	11.9409	2.7835	2.9758	6.5277	0.249696	1.22322	1.00195	0.521597	-2.00176	0.290681	0.00280574	-0.938994	0.176	N	fimbrial protein	19	4	16	1	4	4	3312
FORC35_0640	39.5165	30.6846	27.6133	11.1341	87.7846	8.1596	2.22147	0.265918	0.698779	0.362856	1.15151	-1.91094	-0.517092	-1.46253	0.365		fimbrial protein	63	23	37	4	118	5	3310
FORC35_0641	917.662	229.467	245.535	175.361	173.337	416.139	0.18889	1.8135	0.267565	0.764211	-2.40438	0.858775	-1.90204	-0.387957	0.058	M	putative outer membrane fimbrial usher protein	1463	172	329	63	233	255	3308
FORC35_0642	456.636	257.484	262.7	239.382	264.098	337.807	0.578355	1.31195	0.575294	0.929698	-0.789972	0.391716	-0.797629	-0.105165	0.518		minor pilin and initiator	728	193	352	86	355	207	3306
FORC35_0643	592.748	571	656.749	887.941	433.715	1277.79	0.731702	2.23781	1.10797	1.55506	-0.450671	1.16209	0.147923	0.636973	0.71	G	hexuronate transporter ExuT	945	428	880	319	583	783	3304
FORC35_0644	348.122	983.241	579.88	1500.31	904.627	1285.95	2.59859	1.30787	1.66574	1.52589	1.37773	0.387217	0.736161	0.609648	0.263	G	glucuronate isomerase	555	737	777	539	1216	788	3302
FORC35_0645	311.742	739.098	432.111	890.725	635.322	894.29	2.03798	1.20997	1.38612	1.20515	1.02714	0.274976	0.471051	0.269214	0.4	G	altronate hydrolase	497	554	579	320	854	548	3300
FORC35_0646	46.4163	44.0257	52.9877	52.8868	61.7468	58.749	1.33028	1.33443	1.14158	1.20127	0.411733	0.416218	0.191026	0.264562	0.754		membrane protein	74	33	71	19	83	36	3298
FORC35_0647	1307.18	2460.1	3088.21	7498.79	6719.24	1685.77	5.14025	0.685243	2.3625	3.04816	2.36184	-0.545312	1.24031	1.60794	0.061	E	serine/threonine protein kinase	2084	1844	4138	2694	9032	1033	3296
FORC35_0648	165.593	57.3668	93.2882	47.3197	90.0164	47.3256	0.5436	0.824965	0.563358	0.824862	-0.879383	-0.277595	-0.827876	-0.277775	0.479	P	membrane protein	264	43	125	17	121	29	3292
FORC35_0649	743.287	1039.27	1523.96	12041.5	1205.92	5272.72	1.62242	5.07347	2.05029	11.5864	0.698144	2.34297	1.03583	3.53437	0.565	R	oxidoreductase	1185	779	2042	4326	1621	3231	3290
FORC35_0650	48.9252	53.3645	74.6306	27.8351	71.4179	44.0617	1.45974	0.825674	1.5254	0.521603	0.545708	-0.276355	0.60919	-0.938975	0.668	S	hypothetical protein	78	40	100	10	96	27	3288
FORC35_0652	200.719	294.839	332.852	183.712	290.879	186.038	1.44919	0.630983	1.6583	0.623093	0.535244	-0.664326	0.729706	-0.682481	0.661	J	methyltransferase family protein	320	221	446	66	391	114	3284
FORC35_0653	2.509	9.3388	3.7315	5.567	2.2318	11.4234	0.889518	1.22322	1.48725	0.596115	-0.168905	0.290683	0.572643	-0.746337	1	S	toxin-antitoxin system, toxin component, RelE family	4	7	5	2	3	7	3282
FORC35_0654	312.369	326.858	358.973	361.857	363.041	1008.52	1.16222	3.08552	1.1492	1.10708	0.216883	1.62551	0.200625	0.146757	0.86	K	XRE family transcriptional regulator	498	245	481	130	488	618	3280
FORC35_0655	170.611	197.449	152.246	3921.97	279.72	15891.6	1.63952	80.4847	0.892359	19.8633	0.713273	6.33064	-0.164304	4.31203	0.561	C	2,4-dienoyl-CoA reductase	272	148	204	1409	376	9738	3278
FORC35_0656	245.881	222.797	286.581	258.867	206.071	393.292	0.838091	1.76525	1.16553	1.1619	-0.254821	0.819872	0.220986	0.216482	0.837	G	alpha-glucosidase	392	167	384	93	277	241	3276
FORC35_0657	80.9148	41.3575	85.8251	22.2681	64.7225	58.749	0.799885	1.42052	1.06068	0.53843	-0.322136	0.506415	0.084996	-0.893171	0.807		hypothetical protein	129	31	115	8	87	36	3274
FORC35_0658	168.729	26.6822	39.5542	22.2681	35.709	221.94	0.211635	8.31792	0.234424	0.834568	-2.24035	3.05622	-2.09281	-0.260899	0.08	E	amino acid permease	269	20	53	8	48	136	3272
FORC35_0659	21.9536	9.3388	14.1798	19.4846	17.1106	79.9639	0.779398	8.56255	0.645899	2.08641	-0.359567	3.09804	-0.63062	1.06103	0.81	G	beta-D-galactosidase subunit beta	35	7	19	7	23	49	3270
FORC35_0660	169.357	190.778	253.744	281.135	210.534	696.828	1.24314	3.65256	1.49828	1.47362	0.31399	1.86891	0.583309	0.559368	0.8	G	beta-D-galactosidase subunit alpha	270	143	340	101	283	427	3268
FORC35_0661	610.938	442.925	405.244	256.083	558.697	221.94	0.91449	0.501079	0.663314	0.578164	-0.128961	-0.99689	-0.592236	-0.79045	0.916	K	LacI family transcriptional regulator	974	332	543	92	751	136	3266
FORC35_0662	59.5884	62.7033	69.4064	247.733	72.1619	262.738	1.21101	4.19018	1.16476	3.95087	0.276206	2.06701	0.220037	1.98217	0.825	J	methionyl-tRNA synthetase	95	47	93	89	97	161	3264
FORC35_0663	9009.14	14597.9	15162.7	53869.4	11272.9	163149	1.25127	11.1762	1.68303	3.69022	0.323394	3.48236	0.751064	1.88371	0.788	E	putrescine--2-oxoglutarate aminotransferase	14363	10942	20317	19353	15153	99974	3262
FORC35_0664	0.6273	0	0	0	0	0	0	-	0	-	-	-	-	-	1		hypothetical protein	1	0	0	0	0	0	3260
FORC35_0665	262.816	150.755	158.963	180.928	188.216	279.058	0.71615	1.85107	0.604845	1.20015	-0.481666	0.88836	-0.725363	0.263216	0.695	N	aerotaxis receptor	419	113	213	65	253	171	3258
FORC35_0666	412.728	729.759	721.678	723.714	999.851	184.406	2.42254	0.252695	1.74855	0.991715	1.27652	-1.98453	0.806162	-0.0120018	0.297	K	transcriptional regulator	658	547	967	260	1344	113	3256
FORC35_0667	762.732	1814.39	966.466	545.569	1775.03	187.67	2.3272	0.103434	1.26711	0.30069	1.2186	-3.27321	0.341543	-1.73365	0.319	P	FMN reductase	1216	1360	1295	196	2386	115	3254
FORC35_0668	5366.1	3020.43	3471.07	4606.72	3402.77	3585.32	0.634124	1.18702	0.646852	1.52519	-0.657164	0.247347	-0.628493	0.608985	0.587	L	DNA glycosylase	8555	2264	4651	1655	4574	2197	3250
FORC35_0670	15444.1	19267.2	20868.2	20333.6	20089.3	33855.7	1.30078	1.75716	1.35121	1.05534	0.379372	0.813249	0.434253	0.0777132	0.753	K	RNA polymerase sigma factor RpoD	24622	14442	27962	7305	27004	20746	3248
FORC35_0671	3.7635	17.3435	9.702	5.567	14.1348	16.3192	3.75576	0.94094	2.57792	0.320985	1.9091	-0.0878247	1.36621	-1.63942	0.179		hypothetical protein	6	13	13	2	19	10	3246
FORC35_0672	2259.97	5796.72	3991.24	8311.57	4567.03	4616.69	2.02084	0.796432	1.76606	1.43384	1.01495	-0.328378	0.820534	0.519886	0.404	L	DNA primase	3603	4345	5348	2986	6139	2829	3244
FORC35_0673	797.231	1592.93	1598.59	367.424	1017.71	577.698	1.27655	0.362664	2.00517	0.230659	0.352251	-1.4633	1.00373	-2.11617	0.771	J	30S ribosomal protein S21	1271	1194	2142	132	1368	354	3242
FORC35_0674	890.69	907.196	1102.29	798.869	838.417	1553.58	0.941311	1.71251	1.23757	0.880591	-0.0872561	0.776113	0.307513	-0.183457	0.943	O	glycoprotease/Kae1 family metallohydrolase	1420	680	1477	287	1127	952	3240
FORC35_0675	57.0795	61.3692	81.3473	58.4538	65.4664	83.2277	1.14693	1.35618	1.42516	0.952494	0.197782	0.439549	0.511122	-0.070218	0.885	P	L-tartrate/succinate antiporter	91	46	109	21	88	51	3238
FORC35_0676	23.2081	24.014	45.5246	36.1857	26.7817	19.583	1.15398	0.815483	1.96158	1.50686	0.206619	-0.294274	0.972018	0.591544	0.9	C	L(+)-tartrate dehydratase subunit beta	37	18	61	13	36	12	3236
FORC35_0677	43.28	26.6822	45.5246	55.6703	34.2211	57.117	0.790691	2.14064	1.05186	2.08642	-0.338814	1.09804	0.0729458	1.06103	0.804	C	tartrate dehydratase subunit alpha	69	20	61	20	46	35	3234
FORC35_0679	89.6963	56.0327	264.938	100.207	589.198	52.2213	6.56881	0.931979	2.95373	1.78836	2.71563	-0.101631	1.56254	0.838635	0.035	K	LysR family transcriptional regulator	143	42	355	36	792	32	3232
FORC35_0680	689.971	763.112	984.377	403.61	537.122	1067.27	0.778471	1.39858	1.42669	0.528899	-0.361285	0.483962	0.512675	-0.918935	0.765	S	glycerol-3-phosphate acyltransferase	1100	572	1319	145	722	654	3230
FORC35_0681	312.369	333.528	348.525	233.815	402.47	326.383	1.28844	0.978578	1.11575	0.701036	0.36563	-0.0312415	0.158011	-0.512439	0.764	H	dihydroneopterin aldolase	498	250	467	84	541	200	3228
FORC35_0682	1048.76	849.83	923.926	648.559	1037.05	825.749	0.988836	0.971665	0.880973	0.763164	-0.0161969	-0.0414696	-0.18283	-0.389936	0.99	V	UDP pyrophosphate phosphatase	1672	637	1238	233	1394	506	3226
FORC35_0683	2248.68	2107.9	2915.82	2825.27	1534	3177.34	0.682177	1.50735	1.29668	1.34032	-0.551781	0.592015	0.374822	0.422583	0.648	J	tRNA nucleotidyl transferase	3585	1580	3907	1015	2062	1947	3224
FORC35_0684	746.423	928.542	732.872	798.869	564.648	1067.27	0.756471	1.14941	0.981845	0.860347	-0.402642	0.20089	-0.026433	-0.217009	0.74	T	hypothetical protein	1190	696	982	287	759	654	3222
FORC35_0685	1391.86	2121.24	1353.05	1934.54	1991.52	1568.27	1.43083	0.739319	0.972118	0.911987	0.516855	-0.435732	-0.0407971	-0.132914	0.669	S	hypothetical protein	2219	1590	1813	695	2677	961	3220
FORC35_0686	3170.73	6379.72	3844.97	8578.79	6542.92	3497.2	2.06354	0.548173	1.21264	1.3447	1.04512	-0.867296	0.278155	0.42728	0.39	O	glnD PII-uridylyltransferase family protein	5055	4782	5152	3082	8795	2143	3218
FORC35_0687	1336.66	2218.63	1969.5	2844.75	2405.89	1754.31	1.79992	0.790718	1.47345	1.28221	0.847936	-0.338765	0.559194	0.358635	0.485	M	heptose 7-phosphate kinase/heptose 1-phosphate adenyltransferase	2131	1663	2639	1022	3234	1075	3216
FORC35_0688	227.69	172.101	163.441	80.7219	200.119	96.283	0.878908	0.559458	0.71782	0.469039	-0.186216	-0.837898	-0.478305	-1.09222	0.882	S	membrane protein	363	129	219	29	269	59	3214
FORC35_0689	120.431	86.7173	63.436	58.4538	103.407	60.3809	0.85864	0.696296	0.52674	0.674073	-0.219875	-0.522228	-0.924838	-0.569023	0.861		membrane protein	192	65	85	21	139	37	3212
FORC35_0690	1945.09	1995.83	1494.85	12659.4	944.056	12905.2	0.485353	6.46607	0.768524	6.34293	-1.04289	2.69289	-0.379837	2.66515	0.392		glycogen synthesis protein GlgS	3101	1496	2003	4548	1269	7908	3210
FORC35_0691	444.091	80.0467	106.722	83.5054	70.674	256.211	0.159143	3.20077	0.240315	1.04321	-2.6516	1.67842	-2.057	0.0610276	0.04		hypothetical protein	708	60	143	30	95	157	3208
FORC35_0692	95.3415	20.0117	32.0911	8.3505	20.8302	17.9511	0.21848	0.89703	0.336591	0.417281	-2.19443	-0.156771	-1.57093	-1.26091	0.094	N	fimbrial assembly protein PapD	152	15	43	3	28	11	3206
FORC35_0693	386.384	92.0537	131.35	75.1549	93.736	96.283	0.242598	1.04594	0.339946	0.816425	-2.04336	0.0648054	-1.55662	-0.292609	0.104	M	fimbrial outer membrane usher protein StdB	616	69	176	27	126	59	3204
FORC35_0694	39.5165	24.014	43.2857	5.567	23.062	9.7915	0.583604	0.407741	1.09538	0.231823	-0.776938	-1.29427	0.131435	-2.1089	0.556	N	fimbrial protein	63	18	58	2	31	6	3202
FORC35_0695	555.113	1150	1337.38	648.559	1412.74	595.649	2.54495	0.517954	2.4092	0.563962	1.34764	-0.949105	1.26855	-0.82633	0.272	S	hypothetical protein	885	862	1792	233	1899	365	3200
FORC35_0696	785.313	2115.9	1859.79	1425.16	1638.15	3879.06	2.08598	1.83329	2.36822	0.673547	1.06073	0.874436	1.2438	-0.570149	0.384	H	3,4-dihydroxy-2-butanone 4-phosphate synthase	1252	1586	2492	512	2202	2377	3198
FORC35_0697	80.2876	60.0351	177.621	100.207	232.108	40.7979	2.89096	0.679567	2.21231	1.66913	1.53155	-0.557311	1.14555	0.739098	0.217		hypothetical protein	128	45	238	36	312	25	3196
FORC35_0698	2382.91	1850.41	2468.78	1670.11	2212.47	2673.08	0.928473	1.44458	1.03604	0.90256	-0.107068	0.530654	0.0510732	-0.147906	0.929	P	zinc transporter ZupT	3799	1387	3308	600	2974	1638	3194
FORC35_0699	156.812	266.822	291.059	267.217	412.141	292.113	2.62825	1.09478	1.85611	1.00148	1.3941	0.130646	0.892279	0.00213417	0.26	S	LigB family dioxygenase	250	200	390	96	554	179	3192
FORC35_0700	5305.25	7629.79	5451.76	5160.64	5892.72	4502.45	1.11073	0.590115	1.02762	0.67638	0.151513	-0.760931	0.0393014	-0.564094	0.9	E	hypothetical protein	8458	5719	7305	1854	7921	2759	3190
FORC35_0701	4672.99	5827.4	4628.59	3863.52	4215.89	4561.2	0.902183	0.782717	0.990499	0.662992	-0.148508	-0.353438	-0.0137732	-0.592938	0.902	S	membrane protein	7450	4368	6202	1388	5667	2795	3188
FORC35_0702	21527.7	25743	25463.9	20592.4	19307.4	16825	0.896861	0.653577	1.18284	0.799923	-0.157043	-0.613571	0.24226	-0.322067	0.896	M	outer membrane channel protein	34321	19296	34120	7398	25953	10310	3186
FORC35_0703	1029.31	1263.4	985.87	1247.01	779.646	1230.46	0.757444	0.973928	0.957795	0.987027	-0.400789	-0.0381135	-0.0622112	-0.0188381	0.741	L	ADP-ribose pyrophosphatase	1641	947	1321	448	1048	754	3184
FORC35_0704	656.727	1101.98	714.215	1041.03	636.066	714.779	0.968539	0.648633	1.08754	0.944697	-0.0461177	-0.624525	0.121063	-0.082076	0.971	S	dehydrogenase	1047	826	957	374	855	438	3182
FORC35_0705	2016.6	4049.03	2728.49	4990.84	3225.71	2434.82	1.59958	0.601334	1.35302	1.2326	0.677693	-0.733763	0.436181	0.301707	0.575	R	3',5'-cyclic-nucleotide phosphodiesterase	3215	3035	3656	1793	4336	1492	3180
FORC35_0706	863.719	1251.4	1019.45	815.57	1302.63	638.079	1.50817	0.509893	1.18031	0.651727	0.592798	-0.971733	0.239163	-0.61766	0.624	R	esterase	1377	938	1366	293	1751	391	3178
FORC35_0707	2864.01	4342.54	3459.13	4275.48	4445.02	3368.27	1.55203	0.775647	1.20779	0.984558	0.634155	-0.366528	0.272372	-0.0224518	0.6	L	DNA topoisomerase IV subunit B	4566	3255	4635	1536	5975	2064	3176
FORC35_0708	435.936	108.063	74.6306	41.7527	116.054	106.075	0.266218	0.981598	0.171196	0.386373	-1.90932	-0.0267961	-2.54628	-1.37193	0.128		membrane protein	695	81	100	15	156	65	3174
FORC35_0709	220.164	25.3481	36.569	8.3505	17.1106	29.3745	0.0777177	1.15884	0.166099	0.329433	-3.68561	0.212687	-2.58988	-1.60194	0.007		outer membrane insertion C-terminal signal domain protein	351	19	49	3	23	18	3172
FORC35_0710	975.369	128.075	150.007	242.166	188.216	221.94	0.192969	1.7329	0.153796	1.89082	-2.37356	0.793186	-2.70091	0.919008	0.061	S	3-octaprenyl-4-hydroxybenzoate carboxy-lyase	1555	96	201	87	253	136	3170
FORC35_0711	301.078	48.028	36.569	36.1857	51.3316	62.0128	0.170492	1.29118	0.12146	0.753429	-2.55222	0.36869	-3.04145	-0.408456	0.047	G	carbohydrate kinase	480	36	49	13	69	38	3168
FORC35_0712	202.601	46.6939	41.7931	27.8351	37.9408	63.6447	0.187269	1.36302	0.206283	0.596119	-2.41682	0.446806	-2.2773	-0.746329	0.062	M	hypothetical protein	323	35	56	10	51	39	3166
FORC35_0713	215.773	82.715	77.6158	55.6703	115.31	93.0192	0.534405	1.12457	0.359711	0.673038	-0.903994	0.16938	-1.47509	-0.571241	0.463	O	ADP-ribosylglycohydrolase	344	62	104	20	155	57	3164
FORC35_0714	77.7786	6.6706	19.404	19.4846	14.1348	11.4234	0.181731	1.7125	0.249477	2.92097	-2.46012	0.776104	-2.00302	1.54645	0.066	K	GntR family transcriptional regulator	124	5	26	7	19	7	3162
FORC35_0716	180.02	38.6893	83.5862	33.4022	84.8088	50.5894	0.471108	1.30758	0.464317	0.863345	-1.08587	0.386901	-1.10682	-0.211991	0.378	G	sodium	287	29	112	12	114	31	3160
FORC35_0717	1891.15	4317.19	4162.89	6563.53	4654.81	3317.68	2.46137	0.768483	2.20125	1.52032	1.29946	-0.379915	1.13832	0.60438	0.288	S	quinol monooxygenase	3015	3236	5578	2358	6257	2033	3158
FORC35_0718	604.038	1721	1220.21	999.282	1442.49	820.854	2.38808	0.476962	2.02009	0.580639	1.25585	-1.06805	1.01442	-0.784288	0.304	R	NADPH quinone reductase MdaB	963	1290	1635	359	1939	503	3156
FORC35_0719	652.337	827.149	688.84	612.373	715.667	726.202	1.09708	0.877958	1.05596	0.740342	0.133673	-0.187776	0.0785528	-0.433737	0.913	T	sensor protein QseC	1040	620	923	220	962	445	3154
FORC35_0720	71.5061	76.0444	152.993	52.8868	192.68	45.6936	2.69459	0.600881	2.13958	0.695473	1.43007	-0.73485	1.09732	-0.523934	0.252	T	transcriptional regulator	114	57	205	19	259	28	3152
FORC35_0721	2830.14	5708.67	6731.68	15802	4897.34	7944.16	1.73042	1.3916	2.37857	2.76807	0.791125	0.476742	1.25009	1.46888	0.514	S	hypothetical protein	4512	4279	9020	5677	6583	4868	3150
FORC35_0722	698.125	748.437	806.01	1035.47	668.799	512.422	0.957993	0.684656	1.15453	1.38351	-0.0619133	-0.54655	0.207311	0.46833	0.96	K	AraC family transcriptional regulator	1113	561	1080	372	899	314	3148
FORC35_0724	1139.08	1174.02	1077.67	1706.29	1495.31	1728.2	1.31274	1.47204	0.946084	1.45338	0.392579	0.557814	-0.0799598	0.539411	0.745	K	antitoxin	1816	880	1444	613	2010	1059	3146
FORC35_0725	333.068	569.666	459.724	868.457	1182.86	355.758	3.55141	0.624502	1.38027	1.5245	1.82839	-0.679221	0.464952	0.608338	0.142	E	ABC transporter substrate-binding protein	531	427	616	312	1590	218	3144
FORC35_0726	1735.59	4634.71	2498.63	4008.26	4209.94	1800	2.42565	0.388375	1.43964	0.864836	1.27837	-1.36448	0.52571	-0.209501	0.296	L	DNA topoisomerase IV subunit A	2767	3474	3348	1440	5659	1103	3142
FORC35_0727	651.709	936.547	795.562	420.311	852.552	695.196	1.30818	0.742297	1.22073	0.448788	0.387559	-0.429931	0.287745	-1.15589	0.749	I	1-acyl-sn-glycerol-3-phosphate acyltransferase	1039	702	1066	151	1146	426	3140
FORC35_0728	1696.7	2712.25	2323.25	2691.66	2454.99	2421.76	1.44692	0.892898	1.36927	0.992408	0.532985	-0.163433	0.453411	-0.0109948	0.659	Q	protein SufI	2705	2033	3113	967	3300	1484	3138
FORC35_0729	517.479	712.416	880.641	729.281	1332.39	407.979	2.57478	0.57267	1.70179	1.02367	1.36445	-0.804225	0.767054	0.0337547	0.266	C	hypothetical protein	825	534	1180	262	1791	250	3136
FORC35_0730	20.6991	16.0094	23.1355	11.1341	36.4529	24.4787	1.76109	1.52902	1.11771	0.695473	0.816466	0.612608	0.16054	-0.523934	0.533	M	membrane protein	33	12	31	4	49	15	3134
FORC35_0731	227.063	157.425	175.382	384.125	231.364	360.653	1.01894	2.29095	0.772392	2.44005	0.0270724	1.19595	-0.372596	1.28691	0.983		hypothetical protein	362	118	235	138	311	221	3132
FORC35_0733	10453.1	7867.26	11228.2	23529	6356.94	24297.6	0.608141	3.08844	1.07415	2.99076	-0.717522	1.62688	0.103196	1.58051	0.553	R	2,5-diketo-D-gluconic acid reductase	16665	5897	15045	8453	8545	14889	3130
FORC35_0734	751.442	1811.72	3062.09	3963.72	5146.56	1150.5	6.84891	0.635031	4.07496	2.18782	2.77587	-0.655102	2.02678	1.12949	0.031	C	aldehyde oxidoreductase	1198	1358	4103	1424	6918	705	3128
FORC35_0735	780.922	601.685	631.375	1021.55	1005.06	941.615	1.28702	1.56496	0.808499	1.69782	0.364029	0.64613	-0.306683	0.76368	0.764	K	AraC family transcriptional regulator	1245	451	846	367	1351	577	3126
FORC35_0736	1035.58	728.425	927.658	1631.14	1160.54	997.1	1.12066	1.36884	0.895782	2.23927	0.164353	0.452958	-0.15878	1.16303	0.892	S	membrane protein	1651	546	1243	586	1560	611	3124
FORC35_0738	8821.6	3887.6	2793.42	6610.85	5275.26	564.643	0.597993	0.145242	0.316657	1.70049	-0.741799	-2.78347	-1.65901	0.765954	0.54	E	cystathionine beta-lyase	14064	2914	3743	2375	7091	346	3122
FORC35_0739	6086.17	11972.3	10337.1	2023.62	8095.52	1028.11	1.33015	0.0858736	1.69845	0.169024	0.411588	-3.54164	0.764221	-2.5647	0.733	U	biopolymer transporter ExbB	9703	8974	13851	727	10882	630	3120
FORC35_0740	2381.66	5080.3	3518.83	1174.64	2800.92	452.041	1.17604	0.0889791	1.47747	0.231215	0.233937	-3.49039	0.563131	-2.11269	0.846	U	biopolymer transporter ExbD	3797	3808	4715	422	3765	277	3118
FORC35_0741	45.1618	101.392	105.975	169.794	156.227	99.5469	3.45927	0.981797	2.34657	1.67462	1.79047	-0.0265026	1.23055	0.743838	0.156		transcriptional regulator	72	76	142	61	210	61	6178
FORC35_0742	4878.72	3019.1	3365.09	8884.98	1326.44	12941.1	0.271882	4.28641	0.689748	2.94293	-1.87895	2.09977	-0.535858	1.55725	0.131	I	oxidoreductase	7778	2263	4509	3192	1783	7930	3116
FORC35_0743	1122.77	1910.45	1066.47	993.715	2127.66	409.611	1.89501	0.214406	0.949856	0.520147	0.922203	-2.22159	-0.07422	-0.943008	0.448	S	membrane protein	1790	1432	1429	357	2860	251	3114
FORC35_0744	427.782	418.911	454.5	4946.31	581.015	2805.26	1.3582	6.69656	1.06246	11.8075	0.441698	2.74342	0.0874042	3.56163	0.715	C	L-glyceraldehyde 3-phosphate reductase	682	314	609	1777	781	1719	3112
FORC35_0745	1408.17	681.731	927.658	2198.98	437.435	4409.44	0.310641	6.468	0.658769	3.22558	-1.68668	2.69332	-0.602155	1.68956	0.173	Q	dienelactone hydrolase	2245	511	1243	790	588	2702	3110
FORC35_0746	31.9896	6.6706	16.4187	821.137	15.6227	34.2702	0.488368	5.1375	0.513251	123.098	-1.03396	2.36107	-0.962263	6.94366	0.438		hypothetical protein	51	5	22	295	21	21	3108
FORC35_0748	101.614	70.7079	183.591	3473.83	267.073	254.579	2.62831	3.60043	1.80675	49.1292	1.39414	1.84817	0.853398	5.61851	0.261	C	hydrogenase 2 small subunit	162	53	246	1248	359	156	3106
FORC35_0749	53.9432	38.6893	75.3769	1867.74	85.5527	172.983	1.58598	4.47108	1.39734	48.2753	0.665372	2.16062	0.482681	5.59321	0.598	C	hydrogenase	86	29	101	671	115	106	3104
FORC35_0750	47.0435	42.6916	71.6453	1258.15	72.9058	124.026	1.54975	2.90515	1.52296	29.4706	0.632038	1.53861	0.606877	4.88121	0.616	C	hydrogenase	75	32	96	452	98	76	3102
FORC35_0751	518.106	716.418	717.946	5283.11	986.46	922.032	1.90397	1.287	1.38571	7.37434	0.929015	0.364015	0.470629	2.88251	0.445	C	hydrogenase 2 large subunit	826	537	962	1898	1326	565	3100
FORC35_0752	240.236	480.28	391.064	1789.8	424.788	370.445	1.76821	0.771309	1.62784	3.72657	0.822293	-0.374618	0.702956	1.89785	0.501	C	hydrogenase 2 maturation endopeptidase	383	360	524	643	571	227	3098
FORC35_0753	148.657	250.813	226.877	974.23	246.243	228.468	1.65645	0.91091	1.52617	3.88429	0.728091	-0.134619	0.609917	1.95765	0.555		hydrogenase	237	188	304	350	331	140	3096
FORC35_0754	31.9896	37.3551	46.271	153.093	60.2589	44.0617	1.8837	1.17954	1.44644	4.09832	0.913571	0.23822	0.532505	2.03503	0.478	O	hydrogenase nickel incorporation protein	51	28	62	55	81	27	3094
FORC35_0755	79.6603	62.7033	61.1971	194.846	75.1376	104.443	0.943225	1.66566	0.768226	3.10743	-0.0843259	0.736097	-0.380398	1.63572	0.95	O	hydrogenase 2 accessory protein HypG	127	47	82	70	101	64	3092
FORC35_0756	2014.72	5595.27	5583.11	7328.99	4221.1	4504.09	2.09513	0.804982	2.77117	1.30986	1.06704	-0.312972	1.47049	0.389408	0.381	O	S-transferase	3212	4194	7481	2633	5674	2760	3090
FORC35_0757	2308.27	5249.73	4848	11949.6	6013.99	2831.37	2.60541	0.539337	2.10028	2.27624	1.38151	-0.890742	1.07058	1.18665	0.26	E	bifunctional glutathionylspermidine amidase/glutathionylspermidine synthetase	3680	3935	6496	4293	8084	1735	3088
FORC35_0758	0	0	0	0	0	0	-	-	-	-	-	-	-	-	1		hypothetical protein	0	0	0	0	0	0	3086
FORC35_0759	70.8789	42.6916	78.3621	25.0516	42.4044	47.3256	0.598265	1.10855	1.10558	0.586804	-0.741142	0.148669	0.1448	-0.769049	0.555	P	phosphate transporter	113	32	105	9	57	29	3084
FORC35_0760	21.9536	12.007	17.9113	0	14.1348	16.3192	0.643849	1.35914	0.815871	0	-0.635206	0.442695	-0.293587	-	0.666	F	ATP-binding protein	35	9	24	0	19	10	3082
FORC35_0761	113.532	54.6986	33.5838	22.2681	37.1968	21.2149	0.327634	0.387851	0.29581	0.407105	-1.60984	-1.36643	-1.75726	-1.29653	0.208	F	hypothetical protein	181	41	45	8	50	13	3080
FORC35_0762	61.4702	45.3598	38.8079	22.2681	40.1726	14.6872	0.65353	0.323793	0.631329	0.490921	-0.613675	-1.62685	-0.663537	-1.02644	0.633	F	hypothetical protein	98	34	52	8	54	9	3078
FORC35_0763	77.1513	92.0537	78.3621	66.8043	74.3937	66.9085	0.964257	0.726842	1.01569	0.72571	-0.05251	-0.460286	0.0224656	-0.462535	0.975	M	membrane protein	123	69	105	24	100	41	3076
FORC35_0764	116.668	89.3855	84.3325	50.1033	84.8088	53.8532	0.726925	0.602483	0.722842	0.560531	-0.460122	-0.731009	-0.468247	-0.835135	0.71		hypothetical protein	186	67	113	18	114	33	3074
FORC35_0765	107.886	61.3692	58.2118	47.3197	64.7225	146.872	0.599913	2.39326	0.539566	0.771066	-0.737174	1.25898	-0.890129	-0.375074	0.556	S	hypothetical protein	172	46	78	17	87	90	3072
FORC35_0766	157.439	104.061	129.857	144.743	103.407	254.579	0.656808	2.44644	0.82481	1.39094	-0.606455	1.29069	-0.277866	0.476065	0.623	R	permease	251	78	174	52	139	156	3070
FORC35_0767	265.325	340.199	386.586	386.909	199.375	594.017	0.751436	1.74609	1.45703	1.1373	-0.412277	0.804128	0.543028	0.185615	0.738	R	permease	423	255	518	139	268	364	3068
FORC35_0768	270.343	182.773	206.727	133.609	191.192	270.898	0.707219	1.48215	0.764682	0.731007	-0.499772	0.567694	-0.387068	-0.452042	0.683	H	8-amino-7-oxononanoate synthase	431	137	277	48	257	166	3066
FORC35_0769	33.2441	14.6752	17.165	0	14.1348	9.7915	0.425182	0.667214	0.516332	0	-1.23385	-0.583778	-0.953628	-	0.358	I	hypothetical protein	53	11	23	0	19	6	3064
FORC35_0770	58.9612	42.6916	54.4803	30.6187	26.7817	89.7554	0.454226	2.10241	0.924003	0.717207	-1.13852	1.07205	-0.114031	-0.479539	0.373	M	short-chain dehydrogenase	94	32	73	11	36	55	3062
FORC35_0771	146.149	86.7173	121.648	36.1857	90.7603	150.136	0.621014	1.73133	0.832357	0.417284	-0.687302	0.79188	-0.264725	-1.2609	0.579	I	acyl-CoA synthetase	233	65	163	13	122	92	3060
FORC35_0772	101.614	60.0351	56.7192	83.5054	49.8438	163.192	0.490521	2.71827	0.558183	1.39094	-1.02761	1.44269	-0.84119	0.476063	0.411		DNA-binding protein	162	45	76	30	67	100	3058
FORC35_0773	573.303	100.058	83.5862	759.899	170.362	1320.22	0.297158	13.1945	0.145797	7.59456	-1.7507	3.72186	-2.77796	2.92497	0.159	K	GntR family transcriptional regulator	914	75	112	273	229	809	3056
FORC35_0774	657.982	156.091	144.037	189.279	133.909	8827.03	0.203514	56.5505	0.218907	1.21262	-2.2968	5.82147	-2.19161	0.278126	0.07	C	glycolate oxidase subunit glcD	1049	117	193	68	180	5409	3054
FORC35_0775	347.495	104.061	79.1084	130.825	75.1376	4659.12	0.216227	44.773	0.227654	1.2572	-2.20938	5.48456	-2.13509	0.330214	0.081	C	FAD-binding protein	554	78	106	47	101	2855	3052
FORC35_0776	1275.82	796.465	853.027	1227.53	499.926	7960.48	0.391847	9.99477	0.668611	1.54122	-1.35164	3.32117	-0.580761	0.624075	0.271	C	glycolate oxidase	2034	597	1143	441	672	4878	3050
FORC35_0777	823.575	607.021	635.106	854.539	589.942	3898.65	0.716318	6.42259	0.771158	1.40776	-0.481327	2.68315	-0.374902	0.4934	0.691	S	hypothetical protein	1313	455	851	307	793	2389	3048
FORC35_0778	7688.16	6020.85	6333.9	11991.4	5911.32	42901.4	0.768886	7.12548	0.82385	1.99164	-0.379158	2.83299	-0.279546	0.993959	0.753	C	malate synthase	12257	4513	8487	4308	7946	26289	3046
FORC35_0779	1144.73	377.554	407.483	331.238	213.51	9021.23	0.186516	23.8939	0.355966	0.877327	-2.42263	4.57857	-1.49019	-0.188813	0.056	C	glycolate permease glcA	1825	283	546	119	287	5528	3044
FORC35_0780	3991.8	5257.74	2405.34	4011.04	4653.32	2354.85	1.16572	0.447884	0.602571	0.762884	0.221223	-1.1588	-0.730796	-0.390464	0.854	M	Accessory colonization factor AcfD	6364	3941	3223	1441	6255	1443	3042
FORC35_0781	418.373	308.18	176.874	94.6395	245.499	91.3873	0.586794	0.296539	0.422767	0.307092	-0.769073	-1.75371	-1.24207	-1.70326	0.528	N	peptidase A24	667	231	237	34	330	56	3040
FORC35_0782	139.876	53.3645	29.1059	5.567	39.4287	6.5277	0.281883	0.122323	0.208084	0.10432	-1.82683	-3.03123	-2.26476	-3.26091	0.151		hypothetical protein	223	40	39	2	53	4	3038
FORC35_0783	120.431	70.7079	44.032	16.7011	92.9921	21.2149	0.772158	0.300036	0.365619	0.236199	-0.373032	-1.73679	-1.45159	-2.08193	0.766	U	type II secretion system protein C	192	53	59	6	125	13	3036
FORC35_0784	332.441	341.533	204.488	144.743	534.891	231.732	1.60898	0.678506	0.61511	0.423804	0.686147	-0.559566	-0.701083	-1.23853	0.573	U	type II secretion system protein D	530	256	274	52	719	142	3034
FORC35_0785	127.331	144.084	74.6306	72.3714	244.011	63.6447	1.91635	0.441719	0.586114	0.502286	0.938363	-1.1788	-0.770746	-0.99342	0.444	U	general secretion pathway protein E	203	108	100	26	328	39	3032
FORC35_0786	43.9073	62.7033	44.7783	33.4022	124.981	17.9511	2.84648	0.286286	1.01984	0.532702	1.50918	-1.80447	0.0283389	-0.908598	0.228	U	type II secretion system protein F	70	47	60	12	168	11	3030
FORC35_0787	37.0076	54.6986	30.5985	44.5362	82.577	32.6383	2.23135	0.596694	0.826817	0.814211	1.15792	-0.744938	-0.274361	-0.296525	0.356	U	general secretion pathway protein G	59	41	41	16	111	20	3028
FORC35_0788	33.2441	62.7033	36.569	47.3197	81.8331	26.1107	2.46158	0.416417	1.10001	0.75466	1.29959	-1.2639	0.137523	-0.4061	0.308	U	general secretion pathway protein H	53	47	49	17	110	16	3026
FORC35_0789	20.6991	12.007	18.6576	16.7011	35.709	8.1596	1.72515	0.67957	0.901373	1.39095	0.78672	-0.557305	-0.149805	0.476067	0.548	U	type II secretion system protein I	33	9	25	6	48	5	3024
FORC35_0790	21.3264	33.3528	26.1207	13.9176	40.1726	27.7426	1.8837	0.831792	1.22481	0.417284	0.913571	-0.265705	0.292553	-1.2609	0.477	U	type II secretion system protein J	34	25	35	5	54	17	3022
FORC35_0791	45.789	56.0327	46.271	27.8351	78.8573	32.6383	1.72219	0.582487	1.01053	0.496765	0.784243	-0.779703	0.0151072	-1.00936	0.536	U	type II secretion system protein	73	42	62	10	106	20	3020
FORC35_0792	49.5525	60.0351	68.6601	66.8043	92.9921	65.2766	1.87664	1.08731	1.3856	1.11275	0.90815	0.12076	0.470514	0.154135	0.464	U	GspL	79	45	92	24	125	40	3018
FORC35_0793	35.7531	42.6916	30.5985	33.4022	78.1134	40.7979	2.1848	0.955642	0.855828	0.782407	1.1275	-0.0654573	-0.224607	-0.354009	0.37	U	general secretion pathway protein	57	32	41	12	105	25	3016
FORC35_0794	2407.37	1766.36	1478.43	537.218	1109.21	1808.16	0.460755	1.02366	0.614127	0.304138	-1.11793	0.0337412	-0.703392	-1.7172	0.359	S	hypothetical protein	3838	1324	1981	193	1491	1108	3014
FORC35_0795	2243.66	1532.89	1403.8	606.806	1004.31	2101.91	0.447623	1.3712	0.625674	0.395856	-1.15964	0.45544	-0.676517	-1.33695	0.342	K	addiction module antitoxin	3577	1149	1881	218	1350	1288	3012
FORC35_0796	239.608	308.18	297.03	214.331	307.99	530.373	1.28539	1.72098	1.23965	0.695472	0.362206	0.783233	0.309929	-0.523935	0.767		restriction methylase	382	231	398	77	414	325	3010
FORC35_0797	8.1542	14.6752	5.2241	5.567	0.7439	1.6319	0.0912291	0.111201	0.640664	0.379347	-3.45436	-3.16876	-0.642361	-1.39841	0.084		hypothetical protein	13	11	7	2	1	1	3008
FORC35_0798	131.095	146.752	143.291	194.846	81.8331	279.058	0.624229	1.90156	1.09303	1.32772	-0.679852	0.92718	0.128337	0.408951	0.584		hypothetical protein	209	110	192	70	110	171	3006
FORC35_0799	43.9073	48.028	50.0025	52.8868	26.7817	53.8532	0.60996	1.12129	1.13882	1.10117	-0.713213	0.165156	0.187539	0.139032	0.583		toxin	70	36	67	19	36	33	3004
FORC35_0801	14.4267	25.3481	16.4187	11.1341	14.8787	13.0553	1.03133	0.515041	1.13808	0.439248	0.0445071	-0.957242	0.186599	-1.18689	1		hypothetical protein	23	19	22	4	20	8	3000
FORC35_0802	0.6273	1.3341	0	2.7835	0	0	0	0	0	2.08643	-	-	-	1.06103	1		hypothetical protein	1	1	0	1	0	0	2998
FORC35_0803	40.1438	41.3575	50.7488	61.2373	38.6847	44.0617	0.963653	1.06539	1.26418	1.48068	-0.0534141	0.0913762	0.338197	0.566262	0.984	L	phage DNA repair protein	64	31	68	22	52	27	2996
FORC35_0804	23.8354	12.007	32.0911	5.567	17.1106	13.0553	0.717865	1.08731	1.34636	0.463646	-0.478215	0.12076	0.429067	-1.1089	0.731		hypothetical protein	38	9	43	2	23	8	2994
FORC35_0805	16.9357	24.014	43.2857	2.7835	15.6227	13.0553	0.922471	0.543654	2.55588	0.115912	-0.116424	-0.87924	1.35382	-3.1089	0.963		phage protein	27	18	58	1	21	8	2992
FORC35_0806	35.1258	16.0094	41.7931	25.0516	37.1968	47.3256	1.05896	2.95611	1.18981	1.56481	0.0826474	1.5637	0.250734	0.645984	0.965		hypothetical protein	56	12	56	9	50	29	2990
FORC35_0808	256.544	221.463	297.776	398.043	253.683	403.083	0.988846	1.8201	1.16072	1.79734	-0.0161817	0.864014	0.215021	0.84586	0.99		hypothetical protein	409	166	399	143	341	247	2988
FORC35_0809	85.9328	78.7126	106.722	72.3714	89.2724	115.866	1.03886	1.47201	1.24192	0.919439	0.0550053	0.557791	0.312573	-0.121175	0.971	K	transcriptional regulator	137	59	143	26	120	71	2986
FORC35_0810	5.018	4.0023	1.4926	0	4.4636	1.6319	0.889518	0.407741	0.297449	0	-0.168905	-1.29428	-1.74928	-	1		hypothetical protein	8	3	2	0	6	1	2984
FORC35_0811	223.927	92.0537	111.2	80.7219	158.459	130.553	0.707635	1.41823	0.496588	0.8769	-0.498923	0.50409	-1.00988	-0.189516	0.684	R	GTPase	357	69	149	29	213	80	2982
FORC35_0812	267.207	190.778	152.246	779.384	292.367	279.058	1.09416	1.46273	0.569769	4.08529	0.129823	0.548668	-0.811551	2.03044	0.916		hypothetical protein	426	143	204	280	393	171	2980
FORC35_0813	0	0	0	0	0	0	-	-	-	-	-	-	-	-	1		hypothetical protein	0	0	0	0	0	0	2978
FORC35_0814	3486.86	2797.63	1905.32	971.447	3710.76	742.522	1.06421	0.265411	0.546427	0.347239	0.0897834	-1.9137	-0.871898	-1.526	0.941		DNA-binding protein	5559	2097	2553	349	4988	455	2976
FORC35_0815	114.786	80.0467	88.8104	58.4538	65.4664	60.3809	0.570334	0.754321	0.773703	0.730246	-0.810121	-0.40675	-0.370147	-0.453545	0.516		hypothetical protein	183	60	119	21	88	37	2974
FORC35_0816	1362.38	1610.27	907.508	985.364	1606.9	794.743	1.17948	0.493545	0.666119	0.611923	0.238155	-1.01875	-0.586147	-0.708577	0.844		hypothetical protein	2172	1207	1216	354	2160	487	2972
FORC35_0817	8.1542	0	0	2.7835	0.7439	0	0.0912291	-	0	-	-3.45436	-	-	-	0.084		hypothetical protein	13	0	0	1	1	0	2970
FORC35_0818	49.5525	28.0164	44.032	19.4846	75.1376	24.4787	1.51632	0.873728	0.888593	0.695471	0.600577	-0.194745	-0.170405	-0.523937	0.64		hypothetical protein	79	21	59	7	101	15	2968
FORC35_0819	60.2157	46.6939	44.7783	38.9692	37.9408	55.4851	0.630082	1.18827	0.743632	0.834567	-0.66639	0.248866	-0.42734	-0.2609	0.609		hypothetical protein	96	35	60	14	51	34	2966
FORC35_0820	65.2337	36.021	40.3005	27.8351	4.4636	94.6511	0.0684248	2.62766	0.617787	0.772746	-3.86934	1.39378	-0.69482	-0.371933	0.009	K	transcriptional regulator	104	27	54	10	6	58	2964
FORC35_0822	281.634	218.794	129.857	2034.75	457.521	1680.87	1.62453	7.68243	0.461085	9.29982	0.700018	2.94156	-1.11689	3.2172	0.564	C	glucosyltransferase	449	164	174	731	615	1030	2960
FORC35_0823	1246.97	410.907	352.256	233.815	418.092	417.77	0.335288	1.0167	0.282491	0.569023	-1.57653	0.0238998	-1.82373	-0.813442	0.201	P	hypothetical protein	1988	308	472	84	562	256	2958
FORC35_0825	3.7635	1.3341	0	0	2.9758	0	0.7907	0	0	0	-0.338797	-	-	-	0.851		hypothetical protein	6	1	0	0	4	0	2956
FORC35_0829	12783.3	6965.4	1882.18	2558.05	12512.3	1147.24	0.978799	0.164705	0.147238	0.367251	-0.0309148	-2.60204	-2.76378	-1.44516	0.98		hypothetical protein	20380	5221	2522	919	16819	703	2954
FORC35_0831	3783.55	1568.92	347.032	428.661	4021.72	213.781	1.06295	0.13626	0.0917212	0.273221	0.0880724	-2.87556	-3.4466	-1.87186	0.942	V	colicin V secretion protein CvaA	6032	1176	465	154	5406	131	2952
FORC35_0832	4296.01	2025.18	492.562	1274.85	5644.25	499.366	1.31383	0.246578	0.114656	0.629499	0.393783	-2.01988	-3.12462	-0.667725	0.744	V	hypothetical protein	6849	1518	660	458	7587	306	2950
FORC35_0833	33.8713	8.0047	23.8818	8.3505	47.612	0	1.40567	0	0.705075	1.0432	0.491262	-	-0.504152	0.0610152	0.71		hypothetical protein	54	6	32	3	64	0	2948
FORC35_0834	85.9328	97.3902	50.0025	38.9692	208.302	42.4298	2.42401	0.435668	0.581879	0.400135	1.2774	-1.1987	-0.781209	-1.32144	0.303		hypothetical protein	137	73	67	14	280	26	2946
FORC35_0835	0.6273	2.6682	2.9852	0	2.2318	0	3.55779	0	4.75881	0	1.83098	-	2.2506	-	0.712		hypothetical protein	1	2	4	0	3	0	2944
FORC35_0837	104.123	37.3551	62.6897	22.2681	70.674	29.3745	0.678756	0.786358	0.602074	0.596119	-0.559036	-0.346741	-0.731987	-0.746327	0.653		hypothetical protein	166	28	84	8	95	18	2942
FORC35_0841	1297.15	903.194	1189.61	481.548	944.056	749.049	0.727795	0.829334	0.917099	0.533161	-0.458397	-0.269975	-0.124851	-0.907356	0.705		DNA-binding protein	2068	677	1594	173	1269	459	2936
FORC35_0842	99.105	114.734	104.483	91.856	114.566	70.1724	1.15601	0.611611	1.05426	0.800602	0.209153	-0.709314	0.0762357	-0.320843	0.867		hypothetical protein	158	86	140	33	154	43	2934
FORC35_0843	30.1078	13.3411	20.8966	8.3505	24.5499	8.1596	0.8154	0.611614	0.694059	0.625923	-0.29442	-0.709307	-0.526869	-0.675943	0.84		hypothetical protein	48	10	28	3	33	5	2932
FORC35_0845	2.509	1.3341	2.2389	0	3.7197	0	1.48254	0	0.892348	0	0.568074	-	-0.164322	-	1		hypothetical protein	4	1	3	0	5	0	2930
FORC35_0846	829.847	541.649	874.67	634.641	830.977	295.377	1.00136	0.545328	1.05401	1.17168	0.00196352	-0.874804	0.0758933	0.228582	0.999	S	hypothetical protein	1323	406	1172	228	1117	181	2928
FORC35_0847	4163.66	2253.32	4442.76	6535.69	3825.32	1481.78	0.91874	0.6576	1.06703	2.90048	-0.122272	-0.604719	0.0936019	1.53629	0.919	S	EvpB/family type VI secretion protein	6638	1689	5953	2348	5142	908	2926
FORC35_0848	1541.14	679.063	1764.27	2591.45	1301.15	595.649	0.844272	0.877163	1.14478	3.81622	-0.24422	-0.189083	0.195066	1.93214	0.84	S	type VI secretion protein	2457	509	2364	931	1749	365	2924
FORC35_0849	339.968	213.458	347.032	684.745	315.429	168.087	0.927821	0.787449	1.02078	3.20787	-0.108081	-0.344742	0.0296714	1.68161	0.931	S	hypothetical protein	542	160	465	246	424	103	2922
FORC35_0850	914.526	687.068	866.461	2037.53	667.311	388.396	0.72968	0.565295	0.947443	2.96555	-0.454663	-0.822925	-0.0778891	1.5683	0.707	M	hypothetical protein	1458	515	1161	732	897	238	2920
FORC35_0851	2530.31	1985.16	4455.44	10663.6	2313.64	998.732	0.914371	0.503099	1.76083	5.37168	-0.129149	-0.991085	0.816253	2.42537	0.915	S	type VI secretion system effector, Hcp1 family protein	4034	1488	5970	3831	3110	612	2918
FORC35_0852	1662.2	1215.38	1781.43	4080.63	1297.43	634.815	0.780546	0.52232	1.07173	3.35751	-0.357445	-0.936994	0.0999399	1.74739	0.767	O	type VI secretion ATPase, ClpV1 family	2650	911	2387	1466	1744	389	2916
FORC35_0853	210.755	136.079	179.86	414.744	143.58	106.075	0.681264	0.779504	0.853407	3.04781	-0.553713	-0.359371	-0.228694	1.60777	0.65		hypothetical protein	336	102	241	149	193	65	2914
FORC35_0854	49.5525	24.014	24.6281	83.5054	16.3666	17.9511	0.330288	0.747526	0.49701	3.47736	-1.5982	-0.419803	-1.00865	1.79799	0.22		hypothetical protein	79	18	33	30	22	11	2912
FORC35_0855	4110.97	1651.63	2170.26	4754.24	1969.94	2074.16	0.479192	1.25583	0.527918	2.87851	-1.06133	0.328639	-0.921615	1.52532	0.383	S	hypothetical protein	6554	1238	2908	1708	2648	1271	2910
FORC35_0856	4952.74	1766.36	2011.29	5589.3	2113.52	1729.83	0.426738	0.979317	0.406097	3.16429	-1.22858	-0.0301524	-1.3001	1.66188	0.314	I	hypothetical protein	7896	1324	2695	2008	2841	1060	2908
FORC35_0857	615.329	297.507	382.108	1130.11	304.27	158.296	0.494484	0.532074	0.620982	3.79859	-1.016	-0.910301	-0.687376	1.92546	0.405		hypothetical protein	981	223	512	406	409	97	2906
FORC35_0859	955.297	493.622	730.633	949.178	517.036	391.66	0.541231	0.793441	0.764823	1.92289	-0.885684	-0.333805	-0.386802	0.943274	0.467		type VI secretion protein	1523	370	979	341	695	240	2904
FORC35_0860	1971.44	1503.54	1950.84	2908.77	1635.17	1142.34	0.829432	0.759765	0.989554	1.93461	-0.269804	-0.396374	-0.0151495	0.952043	0.823	S	hypothetical protein	3143	1127	2614	1045	2198	700	2902
FORC35_0861	1299.03	1092.64	1694.11	2441.14	1350.25	997.1	1.03943	0.912563	1.30414	2.23417	0.0557893	-0.132005	0.383098	1.15974	0.964	S	type VI secretion-associated protein	2071	819	2270	877	1815	611	2900
FORC35_0862	236.472	164.096	225.384	353.506	171.106	84.8596	0.723576	0.517135	0.953112	2.15427	-0.466783	-0.951389	-0.0692823	1.1072	0.705		hypothetical protein	377	123	302	127	230	52	2898
FORC35_0863	1511.66	957.893	1082.14	2076.5	984.229	535.268	0.651089	0.558798	0.715862	2.16778	-0.619073	-0.839602	-0.482247	1.11622	0.609	S	type VI secretion protein ImpG	2410	718	1450	746	1323	328	2896
FORC35_0864	524.378	445.594	451.515	1121.76	472.4	292.113	0.900876	0.655559	0.861048	2.51744	-0.150599	-0.609202	-0.215834	1.33196	0.902	S	type VI secretion protein	836	334	605	403	635	179	2894
FORC35_0865	253.408	133.411	244.788	489.899	242.523	112.602	0.957048	0.844024	0.965986	3.67209	-0.0633364	-0.244645	-0.0499263	1.8766	0.961	S	type VI secretion lipoprotein	404	100	328	176	326	69	2892
FORC35_0867	97.8505	50.6963	114.931	217.114	115.31	35.9021	1.17843	0.70818	1.17456	4.28264	0.236869	-0.497812	0.232118	2.0985	0.849	S	type VI secretion system lysozyme-like protein	156	38	154	78	155	22	2890
FORC35_0868	133.603	53.3645	124.633	214.331	98.1997	60.3809	0.735008	1.13148	0.932857	4.01635	-0.444167	0.178212	-0.100272	2.00589	0.72		hypothetical protein	213	40	167	77	132	37	2888
FORC35_0869	698.753	294.839	416.438	737.631	299.807	138.713	0.42906	0.47047	0.595974	2.50181	-1.22075	-1.08783	-0.746679	1.32297	0.319	D	hypothetical protein	1114	221	558	265	403	85	2886
FORC35_0870	1981.47	1536.9	2236.68	3323.52	1994.49	683.773	1.00657	0.444905	1.1288	2.16248	0.00945056	-1.16843	0.174785	1.11269	0.994	S	DNA helicase UvrD	3159	1152	2997	1194	2681	419	2884
FORC35_0871	222.673	150.755	186.576	350.723	158.459	79.9639	0.711621	0.530424	0.837896	2.32645	-0.490818	-0.914782	-0.255158	1.21813	0.689		hypothetical protein	355	113	250	126	213	49	2880
FORC35_0872	1289.62	812.474	1072.44	1881.66	1084.66	602.177	0.84107	0.741164	0.831595	2.31596	-0.249702	-0.432135	-0.266047	1.21161	0.836	S	hypothetical protein	2056	609	1437	676	1458	369	2878
FORC35_0873	129.84	105.395	155.232	211.547	103.407	42.4298	0.79642	0.402579	1.19556	2.00719	-0.328399	-1.31266	0.257686	1.00517	0.791		hypothetical protein	207	79	208	76	139	26	2876
FORC35_0874	0	0	0	0	0	0	-	-	-	-	-	-	-	-	1		hypothetical protein	0	0	0	0	0	0	2874
FORC35_0875	405.201	246.811	403.005	723.714	190.448	120.762	0.470008	0.489289	0.99458	2.93226	-1.08924	-1.03124	-0.00784106	1.55201	0.375	U	hypothetical protein	646	185	540	260	256	74	2872
FORC35_0876	201.346	128.075	166.426	289.486	136.14	37.5341	0.676151	0.293064	0.826567	2.26028	-0.564583	-1.77071	-0.274796	1.1765	0.644	M	ompA family protein	321	96	223	104	183	23	2870
FORC35_0877	365.685	282.832	390.318	779.384	249.963	104.443	0.683547	0.369275	1.06736	2.75564	-0.548887	-1.43723	0.0940486	1.46239	0.653		hypothetical protein	583	212	523	280	336	64	2868
FORC35_0878	285.397	412.241	609.732	1018.77	339.235	261.106	1.18864	0.633384	2.13643	2.47129	0.249315	-0.658849	1.0952	1.30526	0.838	R	hypothetical protein	455	309	817	366	456	160	2866
FORC35_0879	175.002	169.432	391.064	601.239	253.683	171.351	1.4496	1.01133	2.23463	3.54855	0.535654	0.0162474	1.16004	1.82723	0.662	K	transcriptional regulator	279	127	524	216	341	105	2864
FORC35_0880	125.449	78.7126	114.931	231.032	119.774	120.762	0.954759	1.53421	0.916156	2.93513	-0.0667921	0.617498	-0.126335	1.55342	0.958		perC transcriptional activator family protein	200	59	154	83	161	74	2862
FORC35_0881	3.1362	2.6682	7.4631	11.1341	4.4636	3.2638	1.42325	1.22322	2.37966	4.17289	0.50919	0.290686	1.25076	2.06105	0.872		hypothetical protein	5	2	10	4	6	2	2860
FORC35_0882	23.8354	28.0164	38.0616	61.2373	33.4772	16.3192	1.40452	0.582487	1.59685	2.18577	0.490073	-0.779701	0.67523	1.12814	0.719	L	insertion element IS1 5 protein insA	38	21	51	22	45	10	2858
FORC35_0883	266.58	136.079	188.069	97.423	225.413	60.3809	0.845574	0.443718	0.705489	0.715928	-0.241997	-1.17228	-0.503305	-0.482114	0.845	L	IS1 transposase	425	102	252	35	303	37	2856
FORC35_0884	21.9536	22.6799	9.702	5.567	14.1348	8.1596	0.643849	0.359772	0.441932	0.24546	-0.635206	-1.47484	-1.1781	-2.02644	0.666		hypothetical protein	35	17	13	2	19	5	2854
FORC35_0885	345.613	390.895	247.774	192.062	476.12	127.289	1.37761	0.325636	0.71691	0.491341	0.462167	-1.61867	-0.480135	-1.0252	0.704	K	tellurium resistance protein TerW	551	293	332	69	640	78	2852
FORC35_0886	878.773	1500.88	1034.38	1149.59	1891.83	481.415	2.15281	0.320756	1.17707	0.765947	1.10622	-1.64045	0.235204	-0.384684	0.364		hypothetical protein	1401	1125	1386	413	2543	295	2850
FORC35_0887	694.362	1499.54	1072.44	1578.25	2576.25	535.268	3.71025	0.356954	1.5445	1.05249	1.89151	-1.48619	0.627139	0.0738062	0.128	G	ATP synthase	1107	1124	1437	567	3463	328	2848
FORC35_0888	765.241	2046.53	1302.3	1973.51	3490.55	491.207	4.56138	0.240019	1.70182	0.964322	2.18947	-2.05878	0.76708	-0.0524134	0.081		hypothetical protein	1220	1534	1745	709	4692	301	2846
FORC35_0889	329.932	959.227	535.847	1080	1907.45	212.149	5.78136	0.221167	1.62412	1.12591	2.53141	-2.17679	0.699655	0.171092	0.047		hypothetical protein	526	719	718	388	2564	130	2844
FORC35_0890	273.479	892.521	379.87	768.25	1674.6	190.934	6.12332	0.213927	1.38902	0.860764	2.61431	-2.22481	0.474072	-0.21631	0.041		hypothetical protein	436	669	509	276	2251	117	2842
FORC35_0891	286.652	305.512	203.741	144.743	517.78	153.4	1.8063	0.502109	0.710763	0.473772	0.853041	-0.993928	-0.49256	-1.07774	0.485	I	hypothetical protein	457	229	273	52	696	94	2840
FORC35_0892	2618.75	7664.47	5365.94	4442.49	13123.8	1455.67	5.01146	0.189924	2.04904	0.579621	2.32523	-2.3965	1.03495	-0.786819	0.065	T	tellurium resistance protein TerZ	4175	5745	7190	1596	17641	892	2838
FORC35_0893	5284.55	15419.7	7350.36	7301.16	17809.1	2292.84	3.37003	0.148696	1.39091	0.473496	1.75276	-2.74956	0.476034	-1.07857	0.157	R	tellurium resistance protein TerA	8425	11558	9849	2623	23939	1405	2836
FORC35_0894	2100.02	6289	3443.45	4333.93	7253.38	879.602	3.45396	0.139864	1.63972	0.689128	1.78825	-2.83791	0.713452	-0.537155	0.149	P	tellurite resistance protein	3348	4714	4614	1557	9750	539	2834
FORC35_0895	6116.91	17727.7	9971.39	13032.4	20026.8	2310.79	3.274	0.130349	1.63014	0.735145	1.71106	-2.93954	0.704992	-0.4439	0.166	P	inner membrane tellurium resistance protein	9752	13288	13361	4682	26920	1416	2832
FORC35_0896	6460.64	16828.5	11529.7	20573	24198.8	2844.43	3.74557	0.169025	1.7846	1.22251	1.90519	-2.56469	0.835603	0.289843	0.125	T	tellurium resistance protein	10300	12614	15449	7391	32528	1743	2830
FORC35_0897	6474.44	18033.2	10830.4	21803.3	22471.4	3133.28	3.47078	0.173751	1.67279	1.20906	1.79526	-2.52491	0.742257	0.273889	0.147	T	tellurium resistance protein TerE	10322	13517	14512	7833	30206	1920	2828
FORC35_0898	4321.1	7156.18	4033.04	6432.7	10281.2	1741.25	2.3793	0.243322	0.933335	0.898902	1.25054	-2.03906	-0.0995333	-0.153764	0.306	T	tellurium resistance protein TerF	6889	5364	5404	2311	13820	1067	2826
FORC35_0901	731.997	877.846	708.244	729.281	717.899	530.373	0.980741	0.604175	0.967551	0.830762	-0.0280563	-0.726961	-0.0475909	-0.267493	0.982		hypothetical protein	1167	658	949	262	965	325	2822
FORC35_0906	202.601	33.3528	38.0616	11.1341	15.6227	55.4851	0.0771108	1.66358	0.187865	0.333828	-3.69692	0.734293	-2.41223	-1.58282	0.007	K	hypothetical protein	323	25	51	4	21	34	2814
FORC35_0907	1211.84	198.783	160.456	256.083	194.911	159.928	0.160839	0.804535	0.132407	1.28826	-2.63631	-0.313772	-2.91695	0.365421	0.039		hypothetical protein	1932	149	215	92	262	98	2812
FORC35_0908	2664.54	508.297	307.478	414.744	491.742	479.783	0.18455	0.943904	0.115396	0.815948	-2.43791	-0.0832882	-3.11533	-0.293451	0.054		hypothetical protein	4248	381	412	149	661	294	2810
FORC35_0909	6.2725	0	0.7463	0	2.2318	1.6319	0.355807	-	0.11898	-	-1.49083	-	-3.07121	-	0.404		hypothetical protein	10	0	1	0	3	1	2808
FORC35_0911	27.5989	4.0023	8.2094	0	5.2076	4.8958	0.188689	1.22325	0.297454	0	-2.40592	0.290715	-1.74926	-	0.103		membrane protein	44	3	11	0	7	3	2806
FORC35_0912	0	0	0	0	0	0	-	-	-	-	-	-	-	-	1		hypothetical protein	0	0	0	0	0	0	2804
FORC35_0913	413.983	118.736	117.916	80.7219	101.175	212.149	0.244395	1.78673	0.284834	0.679844	-2.03271	0.83732	-1.81181	-0.556725	0.106	R	phosphate starvation-inducible protein PsiE	660	89	158	29	136	130	2802
FORC35_0914	9.4087	2.6682	2.9852	0	2.2318	6.5277	0.237206	2.44648	0.317281	0	-2.07579	1.29071	-1.65617	-	0.194		hypothetical protein	15	2	4	0	3	4	2800
FORC35_0915	890.063	521.638	418.677	295.053	371.968	481.415	0.417912	0.922891	0.470391	0.565627	-1.25873	-0.115767	-1.08807	-0.822077	0.305	G	hexuronate transporter	1419	391	561	106	500	295	2798
FORC35_0916	2534.08	875.178	1177.67	1394.54	1028.12	1865.28	0.405718	2.13132	0.464733	1.59344	-1.30145	1.09174	-1.10552	0.672142	0.288	L	integrase	4040	656	1578	501	1382	1143	2796
FORC35_0917	1751.27	558.993	784.367	1191.34	846.6	1602.54	0.48342	2.86684	0.447884	2.13123	-1.04865	1.51946	-1.1588	1.09169	0.389	L	Transposase insC for insertion element IS2A/D/F/H/I/K	2792	419	1051	428	1138	982	2794
FORC35_0918	6323.27	1368.8	1956.07	3629.7	3815.65	5439.17	0.60343	3.97368	0.309344	2.65174	-0.728742	1.99048	-1.69272	1.40694	0.547	K	AraC family transcriptional regulator	10081	1026	2621	1304	5129	3333	2792
FORC35_0919	1255.12	916.535	960.495	1107.84	984.972	1166.82	0.784763	1.27308	0.765261	1.20872	-0.349671	0.348319	-0.385976	0.273486	0.772	L	integrase	2001	687	1287	398	1324	715	5826
FORC35_0922	1003.59	1778.37	1612.02	2396.61	3526.26	673.981	3.51363	0.378988	1.60625	1.34764	1.81296	-1.39978	0.683693	0.430436	0.144	L	integrase	1600	1333	2160	861	4740	413	2786
FORC35_0923	185.038	213.458	334.345	423.094	497.694	344.334	2.68969	1.61312	1.8069	1.9821	1.42744	0.689857	0.853517	0.987027	0.247	S	membrane protein	295	160	448	152	669	211	2782
FORC35_0924	1804.59	5200.37	2220.26	2329.8	3101.47	1764.1	1.71866	0.339226	1.23034	0.448007	0.781283	-1.55968	0.299058	-1.15841	0.519	E	ornithine decarboxylase	2877	3898	2975	837	4169	1081	2780
FORC35_0925	803.503	773.785	1238.12	3008.98	1452.16	3758.3	1.80729	4.85704	1.5409	3.88865	0.85383	2.28008	0.623777	1.95927	0.482	G	nucleoside permease	1281	580	1659	1081	1952	2303	2778
FORC35_0926	578.949	1170.02	637.345	606.806	1135.99	463.464	1.96216	0.396118	1.10087	0.51863	0.972445	-1.336	0.138639	-0.947221	0.424	M	murein transglycosylase C	923	877	854	218	1527	284	2776
FORC35_0927	311.742	781.79	656.749	648.559	810.147	354.126	2.59878	0.452968	2.10671	0.829582	1.37783	-1.14252	1.07499	-0.269543	0.262	P	oxidative damage protection protein	497	586	880	233	1089	217	2774
FORC35_0928	671.781	909.865	949.301	720.93	930.665	745.785	1.38537	0.819666	1.41311	0.792349	0.470271	-0.286891	0.498874	-0.335792	0.698	L	adenine DNA glycosylase	1071	682	1272	259	1251	457	2772
FORC35_0929	1646.52	2030.52	2070.25	2566.4	1405.3	3916.6	0.853494	1.92887	1.25735	1.26391	-0.228547	0.947752	0.330384	0.337898	0.85	R	tRNA (guanine-N(7)-)-methyltransferase	2625	1522	2774	922	1889	2400	2770
FORC35_0930	1717.4	2762.95	2809.09	4915.69	2533.11	4539.99	1.47496	1.64317	1.63567	1.77915	0.56068	0.716481	0.709878	0.831185	0.643	S	hypothetical protein	2738	2071	3764	1766	3405	2782	2768
FORC35_0931	44.5345	68.0397	64.1823	111.341	45.3802	97.9149	1.01899	1.43908	1.44118	1.63641	0.0271396	0.525152	0.527252	0.710531	1		hypothetical protein	71	51	86	40	61	60	2766
FORC35_0932	937.734	1164.68	520.921	1202.48	816.843	1498.1	0.871082	1.28627	0.555511	1.03245	-0.19912	0.363199	-0.848113	0.0460772	0.87		hypothetical protein	1495	873	698	432	1098	918	2764
FORC35_0933	294.179	297.507	330.613	999.282	522.244	306.8	1.77526	1.03124	1.12385	3.35885	0.82803	0.0443753	0.168452	1.74797	0.498	E	L-asparaginase	469	223	443	359	702	188	2762
FORC35_0934	101.614	92.0537	88.8104	38.9692	98.9436	86.4915	0.97372	0.939577	0.873998	0.423331	-0.0384209	-0.0899174	-0.194299	-1.24014	0.981		hypothetical protein	162	69	119	14	133	53	2760
FORC35_0935	767.75	1139.33	773.173	815.57	1017.71	536.9	1.32557	0.471241	1.00706	0.715832	0.406612	-1.08546	0.0101541	-0.482308	0.737	H	HemN family oxidoreductase	1224	854	1036	293	1368	329	2758
FORC35_0936	672.408	923.206	722.424	303.403	758.816	407.979	1.1285	0.441916	1.07438	0.328641	0.174412	-1.17816	0.103508	-1.60542	0.886	F	nucleoside-triphosphate diphosphatase	1072	692	968	109	1020	250	2756
FORC35_0937	197.583	324.189	217.175	122.475	203.839	109.338	1.03166	0.337267	1.09916	0.377787	0.0449713	-1.56804	0.136401	-1.40435	0.974	S	hypothetical protein	315	243	291	44	274	67	2754
FORC35_0938	869.364	1562.25	866.461	656.909	936.616	533.636	1.07736	0.341583	0.996661	0.420491	0.107498	-1.54969	-0.00482571	-1.24985	0.93	S	YggT family protein	1386	1171	1161	236	1259	327	2752
FORC35_0939	615.329	845.827	826.16	384.125	778.158	461.832	1.26462	0.546012	1.34263	0.454141	0.338705	-0.872994	0.425064	-1.13879	0.78	R	hypothetical protein	981	634	1107	138	1046	283	2750
FORC35_0940	240.236	289.502	261.953	331.238	209.046	791.479	0.870172	2.73393	1.0904	1.14416	-0.200627	1.45098	0.12486	0.194294	0.87	N	putative protein transport	383	217	351	119	281	485	2748
FORC35_0941	493.643	469.608	446.291	158.66	376.432	249.683	0.762559	0.531685	0.904076	0.337857	-0.391079	-0.911357	-0.145484	-1.56551	0.747	L	Holliday junction resolvase	787	352	598	57	506	153	2746
FORC35_0942	945.261	1215.38	960.495	439.795	825.77	469.992	0.87359	0.386705	1.01612	0.361859	-0.194972	-1.3707	0.0230663	-1.4665	0.872	K	hypothetical protein	1507	911	1287	158	1110	288	2744
FORC35_0943	3134.98	6020.85	3287.48	7022.81	4959.08	4761.93	1.58186	0.790907	1.04864	1.16641	0.661618	-0.33842	0.0685247	0.222081	0.584	H	glutathione synthetase	4998	4513	4405	2523	6666	2918	2742
FORC35_0944	998.577	1654.3	1367.23	1116.19	1330.16	1307.16	1.33206	0.790162	1.36918	0.67472	0.413654	-0.33978	0.453313	-0.567638	0.732	S	16S rRNA methyltransferase	1592	1240	1832	401	1788	801	2740
FORC35_0945	56.4522	62.7033	90.303	102.99	117.542	125.657	2.08215	2.004	1.59964	1.6425	1.05807	1.00288	0.677744	0.715891	0.399	L	endonuclease	90	47	121	37	158	77	2738
FORC35_0946	63.3519	112.065	117.916	66.8043	66.2104	53.8532	1.04512	0.480552	1.86129	0.596119	0.06367	-1.05724	0.896303	-0.746328	0.97	S	hypothetical protein	101	84	158	24	89	33	2736
FORC35_0947	1637.74	1263.4	828.399	29750.2	1222.29	675.613	0.746326	0.534756	0.505818	23.5477	-0.422123	-0.903047	-0.983309	4.55751	0.727	G	galactose-proton symporter	2611	947	1110	10688	1643	414	2734
FORC35_0948	91904.2	31786.6	17716.5	33797.4	16987.8	1101.54	0.184842	0.0346544	0.192772	1.06326	-2.43563	-4.85082	-2.37503	0.0884969	0.054	H	S-adenosylmethionine synthetase	146520	23826	23739	12142	22835	675	2732
FORC35_0949	4.3907	0	3.7315	2.7835	2.2318	1.6319	0.508302	-	0.849864	-	-0.976243	-	-0.234695	-	0.682		membrane protein	7	0	5	1	3	1	2730
FORC35_0950	32.6168	32.0187	32.8375	13.9176	30.5014	6.5277	0.935144	0.203871	1.00677	0.434671	-0.0967398	-2.29427	0.00972905	-1.202	0.96		hypothetical protein	52	24	44	5	41	4	2728
FORC35_0951	23043.2	26268.7	23325.8	25210.3	19804.3	20882	0.859446	0.794939	1.01226	0.959709	-0.218522	-0.331084	0.0175868	-0.0593304	0.856	E	biosynthetic arginine decarboxylase	36737	19690	31255	9057	26621	12796	2726
FORC35_0952	114.159	60.0351	49.2562	86.289	45.3802	101.179	0.397518	1.68533	0.431471	1.43731	-1.33091	0.753029	-1.21267	0.52337	0.286		membrane protein	182	45	66	31	61	62	2724
FORC35_0953	358.785	783.124	995.572	1054.95	1055.65	838.805	2.94228	1.0711	2.77484	1.34711	1.55693	0.0990944	1.47241	0.429865	0.207	E	agmatinase	572	587	1334	379	1419	514	2722
FORC35_0955	2005.31	8803.81	4368.87	8712.4	11084.7	1485.04	5.52766	0.168682	2.17865	0.989617	2.46667	-2.56762	1.12344	-0.0150572	0.052	G	transketolase	3197	6599	5854	3130	14900	910	2718
FORC35_0956	0	1.3341	0.7463	0	0	0	-	0	-	0	-	-	-	-	1		hypothetical protein	0	1	1	0	0	0	2716
FORC35_0957	13.7994	8.0047	8.2094	2.7835	6.6954	4.8958	0.485195	0.611616	0.59491	0.347733	-1.04336	-0.709303	-0.749257	-1.52395	0.505	G	PTS mannitol transporter subunit IIA	22	6	11	1	9	3	2714
FORC35_0958	91.578	30.6846	70.899	55.6703	55.7953	70.1724	0.609265	2.28689	0.774192	1.81427	-0.714857	1.19339	-0.369236	0.859393	0.571	G	PTS mannitol transporter subunit IIBC	146	23	95	20	75	43	2712
FORC35_0959	281.634	66.7056	94.7808	86.289	117.542	122.394	0.417358	1.83483	0.336539	1.29358	-1.26064	0.87565	-1.57115	0.371369	0.307	C	L-sorbose 1-phosphate reductase	449	50	127	31	158	75	2710
FORC35_0960	139.876	78.7126	50.7488	136.392	92.2482	141.977	0.6595	1.80374	0.362813	1.73279	-0.600556	0.850988	-1.4627	0.793095	0.626	G	fructose 1,6-bisphosphatase	223	59	68	49	124	87	2708
FORC35_0961	351.258	500.292	488.83	386.909	699.301	270.898	1.99085	0.54148	1.39166	0.773365	0.993381	-0.885021	0.476802	-0.370778	0.415	K	transcriptional regulator	560	375	655	139	940	166	2706
FORC35_0962	289.788	402.902	300.761	384.125	450.826	254.579	1.55571	0.631863	1.03787	0.953396	0.637572	-0.662316	0.0536206	-0.0688527	0.6	H	nucleoside triphosphate hydrolase	462	302	403	138	606	156	2704
FORC35_0964	57.7067	69.3738	107.468	180.928	87.7846	122.394	1.52122	1.76426	1.86231	2.60802	0.605229	0.819066	0.897096	1.38296	0.628	P	cobalt ABC transporter ATP-binding protein	92	52	144	65	118	75	2700
FORC35_0965	38.8893	38.6893	115.677	150.31	97.4557	70.1724	2.50598	1.81374	2.97453	3.88505	1.32537	0.858969	1.57266	1.95793	0.292	P	cobalt ABC transporter permease	62	29	155	54	131	43	2698
FORC35_0966	67.1154	62.7033	255.983	267.217	191.936	115.866	2.85979	1.84785	3.81407	4.26162	1.51591	0.885844	1.93133	2.0914	0.223		membrane protein	107	47	343	96	258	71	2696
FORC35_0967	32.6168	54.6986	295.537	94.6395	345.187	79.9639	10.5831	1.4619	9.06088	1.7302	3.40369	0.547845	3.17965	0.790939	0.011	S	DNA-binding protein	52	41	396	34	464	49	2694
FORC35_0968	1989	9272.08	11781.9	3228.88	8756.14	4528.57	4.40228	0.488409	5.92355	0.348237	2.13825	-1.03384	2.56646	-1.52186	0.088	G	glyceraldehyde-3-phosphate dehydrogenase	3171	6950	15787	1160	11770	2775	2692
FORC35_0969	9588.09	12437.9	19176.3	16698.3	11981.8	20341.8	1.24966	1.63547	2.00001	1.34253	0.321535	0.709703	1.00001	0.424955	0.79	G	phosphoglycerate kinase	15286	9323	25695	5999	16106	12465	2690
FORC35_0970	25626.2	40918.6	45172.4	105401	43529.2	45793.2	1.69862	1.11913	1.76274	2.57586	0.764367	0.162378	0.817824	1.36506	0.528	G	fructose-bisphosphate aldolase	40855	30671	60528	37866	58512	28061	2688
FORC35_0971	38519.2	37638	35524.9	23548.5	18706.3	4254.4	0.485635	0.113035	0.922264	0.625659	-1.04205	-3.14516	-0.116748	-0.676552	0.391	M	small-conductance mechanosensitive channel	61410	28212	47601	8460	25145	2607	2686
FORC35_0972	382.62	310.848	312.702	205.98	320.637	236.628	0.838002	0.761233	0.817264	0.662639	-0.254974	-0.39359	-0.291126	-0.593705	0.834	R	arginine exporter protein	610	233	419	74	431	145	2684
FORC35_0973	9207.98	7877.93	10528.1	11248.2	8029.31	15979.7	0.871995	2.02842	1.14337	1.42781	-0.197609	1.02035	0.193293	0.513803	0.87	S	oxidative stress defense protein	14680	5905	14107	4041	10793	9792	2682
FORC35_0974	268.462	116.068	148.515	169.794	104.895	174.615	0.390727	1.50442	0.553207	1.46289	-1.35577	0.58921	-0.854109	0.548821	0.275	K	LysR family transcriptional regulator	428	87	199	61	141	107	2680
FORC35_0975	193.819	265.488	219.414	231.032	252.195	246.419	1.30118	0.928174	1.13205	0.870214	0.379826	-0.107533	0.178943	-0.200557	0.758	C	acetyl-CoA hydrolase	309	199	294	83	339	151	2678
FORC35_0976	71.5061	94.722	82.0936	55.6703	84.0649	79.9639	1.17563	0.844196	1.14806	0.587723	0.233437	-0.244351	0.199203	-0.766792	0.86	I	methylmalonyl-CoA decarboxylase	114	71	110	20	113	49	2676
FORC35_0977	73.3879	105.395	89.5567	72.3714	78.1134	127.289	1.06439	1.20774	1.22032	0.686669	0.0900278	0.272307	0.287259	-0.542313	0.949	E	protein kinase	117	79	120	26	105	78	2674
FORC35_0978	146.776	217.46	211.951	169.794	213.51	163.192	1.45467	0.750443	1.44405	0.780806	0.54069	-0.414185	0.530116	-0.356963	0.659	I	methylmalonyl-CoA mutase	234	163	284	61	287	100	2672
FORC35_0979	1985.24	2067.87	2318.77	1149.59	2337.45	1104.81	1.17742	0.534272	1.16801	0.555929	0.235625	-0.904354	0.22405	-0.847027	0.845	K	chromosome replication initiation inhibitor protein	3165	1550	3107	413	3142	677	2670
FORC35_0980	8.1542	18.6776	14.9261	5.567	16.3666	4.8958	2.00714	0.262121	1.83048	0.298058	1.00514	-1.93169	0.872222	-1.74634	0.49		hypothetical protein	13	14	20	2	22	3	2668
FORC35_0981	2273.14	6134.25	7401.11	5809.19	6316.02	2868.91	2.77854	0.467687	3.2559	0.94701	1.47433	-1.09638	1.70305	-0.0785483	0.23	G	ribose 5-phosphate isomerase	3624	4598	9917	2087	8490	1758	2666
FORC35_0983	11809.8	18201.3	12479	9917.66	13314.2	3054.95	1.12739	0.167842	1.05666	0.544888	0.172985	-2.57482	0.079515	-0.875969	0.886	E	3-phosphoglycerate dehydrogenase	18828	13643	16721	3563	17897	1872	2664
FORC35_0984	0	0	0.7463	0	0	0	-	-	-	-	-	-	-	-	1		hypothetical protein	0	0	1	0	0	0	2662
FORC35_0985	397.674	639.04	832.877	406.393	1098.05	463.464	2.76118	0.725251	2.09437	0.635943	1.46529	-0.463448	1.06652	-0.65303	0.234	H	5-formyltetrahydrofolate cyclo-ligase	634	479	1116	146	1476	284	2660
FORC35_0986	2114.45	2904.36	3016.57	1658.97	1787.68	4386.59	0.845459	1.51035	1.42664	0.571201	-0.242193	0.594878	0.512626	-0.80793	0.841	S	cell division protein ZapA	3371	2177	4042	596	2403	2688	2658
FORC35_0987	1543.03	3704.83	2508.33	2004.13	3248.77	1176.61	2.10545	0.317588	1.62559	0.540951	1.07413	-1.65477	0.700966	-0.886431	0.378	S	hypothetical protein	2460	2777	3361	720	4367	721	2656
FORC35_0988	4972.81	9482.87	6735.41	9199.51	8355.15	5134.01	1.68017	0.541398	1.35445	0.970119	0.748605	-0.885239	0.437704	-0.0437658	0.536	E	proline aminopeptidase P II	7928	7108	9025	3305	11231	3146	2654
FORC35_0989	1610.14	2460.1	2285.19	2215.68	2435.65	1468.72	1.51269	0.597017	1.41925	0.900644	0.597118	-0.744155	0.505125	-0.150971	0.621	C	2-octaprenyl-6-methoxyphenyl hydroxylase	2567	1844	3062	796	3274	900	2652
FORC35_0990	1015.51	1583.59	1312.01	1714.64	1446.21	1150.5	1.42412	0.726514	1.29196	1.08276	0.510073	-0.460938	0.369566	0.11471	0.673	C	2-octaprenyl-6-methoxyphenyl hydroxylase	1619	1187	1758	616	1944	705	2650
FORC35_0991	0	0	0	0	0	0	-	-	-	-	-	-	-	-	1		hypothetical protein	0	0	0	0	0	0	2648
FORC35_0992	1684.78	2842.99	1390.37	1021.55	1057.13	5040.99	0.62746	1.77313	0.825249	0.359322	-0.672405	0.826296	-0.277098	-1.47665	0.579	E	glycine cleavage system aminomethyltransferase T	2686	2131	1863	367	1421	3089	2646
FORC35_0993	686.208	1256.73	684.362	771.034	514.804	1798.37	0.750216	1.43099	0.99731	0.613522	-0.414621	0.517012	-0.00388545	-0.704814	0.732	E	glycine cleavage system protein H	1094	942	917	277	692	1102	2644
FORC35_0994	4293.5	8456.94	3477.78	4901.77	2833.66	12565.7	0.659987	1.48585	0.810011	0.579615	-0.599491	0.57129	-0.303987	-0.786833	0.62	E	glycine dehydrogenase	6845	6339	4660	1761	3809	7700	2642
FORC35_0995	141.758	106.729	176.128	175.361	63.2346	363.917	0.446075	3.40973	1.24246	1.64305	-1.16464	1.76966	0.313198	0.716379	0.351	I	NAD(P)-binding oxidoreductase	226	80	236	63	85	223	2640
FORC35_0996	1933.17	3159.18	2709.09	3114.75	3173.63	2077.43	1.64167	0.657585	1.40137	0.985938	0.715164	-0.60475	0.486836	-0.0204315	0.555	G	6-phospho-beta-glucosidase	3082	2368	3630	1119	4266	1273	2638
FORC35_0997	440.954	801.801	751.53	598.456	925.457	476.519	2.09876	0.594311	1.70433	0.746389	1.06954	-0.75071	0.769201	-0.422001	0.38	S	hypothetical protein	703	601	1007	215	1244	292	2636
FORC35_0998	1606.38	1128.66	1609.78	673.611	1898.53	2480.51	1.18187	2.19775	1.00212	0.596824	0.241068	1.13603	0.00305257	-0.744623	0.842	R	hypothetical protein	2561	846	2157	242	2552	1520	2634
FORC35_0999	4065.19	5635.29	5408.48	5995.69	5514.8	7924.58	1.35659	1.40624	1.33044	1.06395	0.439988	0.491845	0.411901	0.089436	0.715	R	global regulator	6481	4224	7247	2154	7413	4856	2632
FORC35_1001	634.774	729.759	726.902	1068.87	1202.95	801.27	1.89508	1.09799	1.14514	1.46469	0.922258	0.134868	0.195518	0.550593	0.448	S	hypothetical protein	1012	547	974	384	1617	491	2630
FORC35_1002	590.866	596.348	652.271	1029.9	1125.58	690.3	1.90496	1.15755	1.10392	1.72701	0.92976	0.211069	0.14264	0.788278	0.445		membrane protein	942	447	874	370	1513	423	2628
FORC35_1003	714.434	965.897	865.715	629.074	1465.56	424.298	2.05135	0.439279	1.21175	0.651285	1.03658	-1.18679	0.277091	-0.618639	0.395	C	flavodoxin	1139	724	1160	226	1970	260	2626
FORC35_1004	1424.48	2081.22	1856.06	1881.66	1669.39	1927.29	1.17193	0.926042	1.30298	0.904114	0.228892	-0.110851	0.381812	-0.145423	0.85	L	tyrosine recombinase XerD	2271	1560	2487	676	2244	1181	2624
FORC35_1005	1916.24	3195.2	2337.43	2148.87	2479.54	2067.64	1.29396	0.647108	1.2198	0.672532	0.371796	-0.627923	0.286645	-0.572325	0.758	O	protein-disulfide isomerase	3055	2395	3132	772	3333	1267	2622
FORC35_1006	2985.07	4378.56	2906.11	2777.95	3155.78	2788.94	1.05719	0.636955	0.973551	0.634444	0.0802335	-0.650736	-0.0386719	-0.656436	0.947	L	ssDNA exonuclease RecJ	4759	3282	3894	998	4242	1709	2620
FORC35_1007	72.7606	204.119	125.379	64.0208	107.871	60.3809	1.48254	0.295812	1.72318	0.313644	0.568075	-1.75725	0.78507	-1.6728	0.644		hypothetical protein	116	153	168	23	145	37	2618
FORC35_1008	2066.78	5161.68	3403.15	2045.88	3460.79	1711.88	1.67449	0.331652	1.6466	0.39636	0.74372	-1.59226	0.719489	-1.33512	0.539	J	peptide chain release factor 2	3295	3869	4560	735	4652	1049	2616
FORC35_1009	3855.69	13242.4	6540.62	9494.57	12394	2823.21	3.21447	0.213195	1.69636	0.716983	1.68458	-2.22975	0.762441	-0.47999	0.173	J	lysyl-tRNA synthetase	6147	9926	8764	3411	16660	1730	2614
FORC35_1010	2038.55	956.558	1447.83	2073.72	1470.76	3164.28	0.721475	3.30799	0.710226	2.1679	-0.470979	1.72595	-0.493649	1.11629	0.697	I	isopentenyl-diphosphate delta-isomerase	3250	717	1940	745	1977	1939	2612
FORC35_1011	0	0	0	0	0.7439	0	-	-	-	-	-	-	-	-	1		hypothetical protein	0	0	0	0	1	0	2610
FORC35_1012	58.3339	30.6846	49.2562	33.4022	30.5014	52.2213	0.522876	1.70187	0.844384	1.08857	-0.935459	0.767124	-0.244029	0.122428	0.472	F	purine permease	93	23	66	12	41	32	2608
FORC35_1013	316.132	142.75	237.325	331.238	187.472	458.568	0.593018	3.21239	0.750715	2.32041	-0.753853	1.68365	-0.413663	1.21438	0.536	E	oxidoreductase Fe-S binding subunit	504	107	318	119	252	281	2606
FORC35_1014	60.8429	44.0257	63.436	80.7219	57.2831	99.5469	0.941492	2.26111	1.04262	1.83352	-0.0869793	1.17703	0.0602129	0.874614	0.957	C	effector protein	97	33	85	29	77	61	2604
FORC35_1016	106.632	86.7173	105.975	97.423	112.335	169.719	1.05348	1.95716	0.993843	1.12346	0.075162	0.968758	-0.00890969	0.167943	0.959	R	MFS transporter, AGZA family, xanthine/uracil permease	170	65	142	35	151	104	2600
FORC35_1017	552.604	505.628	438.828	676.394	569.856	731.098	1.03122	1.44592	0.794108	1.33773	0.0443496	0.531987	-0.332592	0.419786	0.972	F	guanine deaminase	881	379	588	243	766	448	2598
FORC35_1018	334.322	185.442	311.956	403.61	348.906	468.36	1.04362	2.52565	0.933098	2.17648	0.0615996	1.33665	-0.0998993	1.122	0.96	F	xanthine permease XanQ	533	139	418	145	469	287	2596
FORC35_1019	659.864	664.388	769.441	996.498	704.508	1122.76	1.06766	1.68991	1.16606	1.49987	0.0944489	0.756949	0.221643	0.584841	0.938	C	hypoxanthine oxidase	1052	498	1031	358	947	688	2594
FORC35_1020	96.596	74.7103	96.2734	108.557	72.1619	148.504	0.747049	1.98774	0.99666	1.45304	-0.420726	0.991126	-0.00482621	0.539075	0.743	C	oxidoreductase	154	56	129	39	97	91	2592
FORC35_1021	99.105	114.734	144.037	172.578	116.798	259.475	1.17853	2.26154	1.45338	1.50416	0.236987	1.1773	0.53941	0.588959	0.851	F	chlorohydrolase/aminohydrolase	158	86	193	62	157	159	2590
FORC35_1022	284.77	238.806	294.044	267.217	260.378	460.2	0.914345	1.92709	1.03257	1.11897	-0.12919	0.946422	0.0462368	0.162174	0.917	E	selenate reductase	454	179	394	96	350	282	2588
FORC35_1023	477.335	173.435	317.18	1748.05	306.502	1615.6	0.642111	9.31531	0.664481	10.079	-0.639105	3.2196	-0.5897	3.33328	0.6	S	hypothetical protein	761	130	425	628	412	990	2586
FORC35_1024	27.5989	14.6752	31.3448	75.1549	20.8302	83.2277	0.754747	5.67132	1.13573	5.12122	-0.405934	2.50368	0.183615	2.35649	0.795		hypothetical protein	44	11	42	27	28	51	2584
FORC35_1025	241.49	200.117	215.682	372.991	197.143	616.864	0.816362	3.08252	0.893131	1.86387	-0.292719	1.62411	-0.163056	0.898298	0.812	O	hypothetical protein	385	150	289	134	265	378	2582
FORC35_1026	274.107	273.493	297.03	214.331	314.685	399.819	1.14804	1.4619	1.08363	0.783679	0.199172	0.547844	0.115869	-0.351666	0.87	E	carbamate kinase-like protein YqeA	437	205	398	77	423	245	2580
FORC35_1027	122.313	145.418	133.589	91.856	138.372	171.351	1.1313	1.17833	1.09219	0.631668	0.177976	0.236748	0.127219	-0.662762	0.886	F	phenylhydantoinase	195	109	179	33	186	105	2578
FORC35_1028	116.668	112.065	137.32	94.6395	149.531	176.247	1.28168	1.57271	1.17702	0.844502	0.35804	0.653257	0.235136	-0.243827	0.774	E	peptidase	186	84	184	34	201	108	2576
FORC35_1029	122.313	165.43	164.187	186.495	142.836	158.296	1.16779	0.956875	1.34235	1.12734	0.22378	-0.063597	0.424763	0.172921	0.859	E	diaminopropionate ammonia-lyase	195	124	220	67	192	97	2574
FORC35_1030	30.1078	32.0187	52.2414	36.1857	29.7575	151.768	0.988365	4.73999	1.73515	1.13014	-0.016884	2.24488	0.795056	0.176505	1	E	ornithine carbamoyltransferase	48	24	70	13	40	93	2572
FORC35_1031	573.931	616.36	706.751	8180.75	901.652	13218.5	1.57101	21.4461	1.23142	13.2727	0.651693	4.42264	0.300326	3.73039	0.591	K	Fis family transcriptional regulator	915	462	947	2939	1212	8100	2570
FORC35_1032	70.2516	100.058	70.899	128.042	116.054	166.455	1.65198	1.66358	1.00922	1.27967	0.724196	0.734293	0.0132342	0.355771	0.561	C	xanthine dehydrogenase subunit C	112	75	95	46	156	102	2568
FORC35_1033	147.403	184.107	155.978	378.558	277.488	285.585	1.88252	1.55119	1.05817	2.05618	0.912662	0.633373	0.0815757	1.03997	0.458	C	xanthine dehydrogenase subunit B	235	138	209	136	373	175	2566
FORC35_1034	434.682	652.381	548.535	1859.39	635.322	1256.58	1.46158	1.92614	1.26192	2.85016	0.547528	0.94571	0.335623	1.51104	0.651	C	xanthine dehydrogenase molybdenum-binding subunit	693	489	735	668	854	770	2564
FORC35_1038	318.641	280.164	273.894	303.403	330.308	435.721	1.03661	1.55524	0.859569	1.08295	0.0518786	0.637137	-0.218315	0.114966	0.966	L	resolvase	508	210	367	109	444	267	2558
FORC35_1039	24.4626	12.007	11.9409	5.567	3.7197	6.5277	0.152057	0.543658	0.488129	0.463646	-2.71732	-0.879229	-1.03467	-1.1089	0.078		hypothetical protein	39	9	16	2	5	4	2556
FORC35_1040	20.0719	4.0023	6.7168	0	3.7197	6.5277	0.185319	1.63099	0.334637	0	-2.43192	0.705745	-1.57933	-	0.125		BppC	32	3	9	0	5	4	2554
FORC35_1041	74.6424	16.0094	47.0173	8.3505	14.1348	19.583	0.189367	1.22322	0.629901	0.5216	-2.40074	0.290683	-0.666804	-0.938985	0.073		transcriptional regulator	119	12	63	3	19	12	2552
FORC35_1042	10.036	1.3341	8.2094	2.7835	2.2318	1.6319	0.222379	1.22322	0.817995	2.08643	-2.1689	0.290686	-0.289836	1.06103	0.171		hypothetical protein	16	1	11	1	3	1	2550
FORC35_1043	7.527	4.0023	4.4778	0	3.7197	11.4234	0.494181	2.85421	0.594898	0	-1.01689	1.51309	-0.749285	-	0.518		ABC transporter ATPase	12	3	6	0	5	7	2548
FORC35_1044	13.1722	8.0047	5.2241	2.7835	7.4394	1.6319	0.56478	0.203868	0.3966	0.347733	-0.824238	-2.29429	-1.33424	-1.52395	0.607		transporter	21	6	7	1	10	1	2546
FORC35_1045	0.6273	0	0	2.7835	0	0	0	-	0	-	-	-	-	-	1		hypothetical protein	1	0	0	1	0	0	2544
FORC35_1046	13.1722	5.3365	9.702	0	2.9758	11.4234	0.225915	2.14062	0.736551	0	-2.14615	1.09803	-0.441142	-	0.158		ACP S-malonyltransferase	21	4	13	0	4	7	2542
FORC35_1047	72.7606	12.007	11.9409	5.567	22.3181	11.4234	0.306733	0.951395	0.164112	0.463646	-1.70494	-0.0718836	-2.60725	-1.1089	0.188		hypothetical protein	116	9	16	2	30	7	2540
FORC35_1048	339.968	118.736	117.916	72.3714	115.31	99.5469	0.33918	0.838389	0.346846	0.609515	-1.55988	-0.254309	-1.52763	-0.714266	0.209		hypothetical protein	542	89	158	26	155	61	2538
FORC35_1049	30.1078	2.6682	2.9852	0	3.7197	1.6319	0.123546	0.611611	0.0991504	0	-3.01688	-0.709314	-3.33424	-	0.049		hypothetical protein	48	2	4	0	5	1	2536
FORC35_1050	2695.91	929.876	1062.74	1322.17	1196.25	1897.92	0.443729	2.04104	0.394205	1.42188	-1.17225	1.02931	-1.34298	0.507796	0.337	M	hypothetical protein	4298	697	1424	475	1608	1163	2534
FORC35_1051	636.655	129.409	105.229	38.9692	100.431	186.038	0.157749	1.4376	0.165284	0.301132	-2.6643	0.523664	-2.59698	-1.73153	0.038		hypothetical protein	1015	97	141	14	135	114	2532
FORC35_1052	556.368	81.3808	83.5862	44.5362	103.407	91.3873	0.185861	1.12296	0.150236	0.547257	-2.4277	0.167305	-2.7347	-0.86971	0.056	L	integrase	887	61	112	16	139	56	2530
FORC35_1053	0	0	0	0	0	0	-	-	-	-	-	-	-	-	1		hypothetical protein	0	0	0	0	0	0	2528
FORC35_1054	151.166	57.3668	78.3621	13.9176	61.0028	40.7979	0.403547	0.711176	0.518383	0.242607	-1.30919	-0.491721	-0.94791	-2.04331	0.293	G	hypothetical protein	241	43	105	5	82	25	2526
FORC35_1055	3.7635	0	5.9704	0	0.7439	3.2638	0.197662	-	1.5864	-	-2.33889	-	0.665753	-	0.298		membrane protein	6	0	8	0	1	2	2524
FORC35_1058	0.6273	0	0.7463	0	0	0	0	-	1.1897	-	-	-	0.2506	-	1		ATP synthase	1	0	1	0	0	0	2520
FORC35_1061	50.1797	21.3458	9.702	5.567	10.4151	1.6319	0.207556	0.0764506	0.193345	0.260801	-2.26843	-3.70933	-2.37075	-1.93898	0.088		surface presentation of antigen protein type m protein	80	16	13	2	14	1	2514
FORC35_1062	0	0	0.7463	0	0	0	-	-	-	-	-	-	-	-	1		hypothetical protein	0	0	1	0	0	0	2512
FORC35_1065	0.6273	0	0	0	0	0	0	-	0	-	-	-	-	-	1		hypothetical protein	1	0	0	0	0	0	2510
FORC35_1066	18.8174	8.0047	29.8522	8.3505	8.9272	3.2638	0.474412	0.407735	1.58641	1.0432	-1.07579	-1.29429	0.66577	0.0610152	0.433	N	type III secretion system protein	30	6	40	3	12	2	2508
FORC35_1067	12.5449	2.6682	13.4335	11.1341	5.2076	3.2638	0.415117	1.22322	1.07083	4.17289	-1.26841	0.290686	0.0987343	2.06105	0.445	U	type III secretion system protein	20	2	18	4	7	2	2506
FORC35_1068	2.509	1.3341	1.4926	2.7835	2.2318	0	0.889518	0	0.594898	2.08643	-0.168905	-	-0.749285	1.06103	1	U	type III secretion system protein SpaQ	4	1	2	1	3	0	2504
FORC35_1069	18.8174	4.0023	24.6281	5.567	2.9758	8.1596	0.158141	2.03873	1.30879	1.39095	-2.66072	1.02767	0.388238	0.476071	0.07	U	type III secretion protein	30	3	33	2	4	5	2502
FORC35_1072	0.6273	0	2.2389	0	0	0	0	-	3.56911	-	-	-	1.83556	-	1	N	hypothetical protein	1	0	3	0	0	0	2498
FORC35_1074	10.036	5.3365	4.4778	0	5.9515	1.6319	0.593015	0.3058	0.446174	0	-0.753859	-1.70934	-1.16432	-	0.654	T	LuxR family transcriptional regulator	16	4	6	0	8	1	2496
FORC35_1075	33.2441	21.3458	35.8227	25.0516	17.8545	26.1107	0.537073	1.22322	1.07757	1.17361	-0.896811	0.290689	0.107776	0.230951	0.49		type III secretion protein	53	16	48	9	24	16	2494
FORC35_1076	5.018	1.3341	5.2241	2.7835	2.2318	1.6319	0.444759	1.22322	1.04107	2.08643	-1.1689	0.290686	0.05807	1.06103	0.568		type III secretion protein	8	1	7	1	3	1	2492
FORC35_1077	15.0539	5.3365	6.7168	11.1341	4.4636	4.8958	0.296508	0.917418	0.446183	2.0864	-1.75386	-0.124349	-1.16429	1.06102	0.268		hypothetical protein	24	4	9	4	6	3	2490
FORC35_1078	38.2621	9.3388	15.6724	5.567	8.1833	11.4234	0.213875	1.22322	0.409606	0.596115	-2.22516	0.290683	-1.28769	-0.746337	0.105	U	type III secretion system lipoprotein PrgK	61	7	21	2	11	7	2488
FORC35_1080	3.7635	1.3341	15.6724	5.567	2.9758	3.2638	0.7907	2.44644	4.16432	4.17285	-0.338797	1.29069	2.05808	2.06103	0.851		hypothetical protein	6	1	21	2	4	2	2484
FORC35_1083	2.509	1.3341	2.2389	0	0.7439	0	0.296493	0	0.892348	0	-1.75393	-	-0.164322	-	0.52		hypothetical protein	4	1	3	0	1	0	2482
FORC35_1086	65.8609	44.0257	43.2857	33.4022	31.2454	29.3745	0.474415	0.667213	0.657229	0.758698	-1.07578	-0.583782	-0.605532	-0.398403	0.404	K	hypothetical protein	105	33	58	12	42	18	2480
FORC35_1087	7.527	14.6752	17.9113	5.567	2.2318	11.4234	0.296506	0.778415	2.37961	0.379347	-1.75387	-0.361388	1.25072	-1.39841	0.296		hypothetical protein	12	11	24	2	3	7	2478
FORC35_1089	0	0	0	0	1.4879	0	-	-	-	-	-	-	-	-	0.569		hypothetical protein	0	0	0	0	2	0	2476
FORC35_1090	27.5989	12.007	76.8695	0	14.8787	1.6319	0.539105	0.135912	2.78524	0	-0.891362	-2.87925	1.4778	-	0.524		hypothetical protein	44	9	103	0	20	1	2474
FORC35_1091	141.131	246.811	650.032	11.1341	160.69	48.9575	1.13859	0.19836	4.60589	0.0451119	0.187254	-2.3338	2.20348	-4.47035	0.884	K	hypothetical protein	225	185	871	4	216	30	2472
FORC35_1092	68.9971	28.0164	33.5838	22.2681	49.8438	6.5277	0.722404	0.232996	0.486742	0.794824	-0.469122	-2.10162	-1.03877	-0.331293	0.713	K	hypothetical protein	110	21	45	8	67	4	2470
FORC35_1093	753.323	168.098	157.47	105.774	219.461	280.69	0.291324	1.6698	0.209034	0.629237	-1.7793	0.739672	-2.25819	-0.668324	0.152	E	transporter	1201	126	211	38	295	172	2468
FORC35_1094	675.545	560.327	247.774	2666.61	522.244	6217.6	0.773071	11.0964	0.366776	4.75902	-0.371328	3.47202	-1.44703	2.25066	0.76	I	putative acyltransferase	1077	420	332	958	702	3810	2466
FORC35_1095	501.797	285.5	378.377	821.137	386.847	1220.67	0.770923	4.27556	0.754043	2.87614	-0.375341	2.09611	-0.407281	1.52413	0.756	G	5-keto-4-deoxyuronate isomerase	800	214	507	295	520	748	2464
FORC35_1096	144.894	114.734	108.214	183.712	175.569	422.666	1.21171	3.68389	0.746851	1.6012	0.277041	1.88123	-0.421107	0.679157	0.823	I	2-deoxy-D-gluconate 3-dehydrogenase	231	86	145	66	236	259	2462
FORC35_1097	341.222	346.869	263.446	993.715	284.928	486.311	0.835021	1.402	0.772066	2.86481	-0.260115	0.487487	-0.373205	1.51844	0.83	G	D-galactose transporter	544	260	353	357	383	298	2460
FORC35_1098	323.032	352.206	340.315	342.372	361.553	213.781	1.11925	0.606978	1.0535	0.972081	0.162531	-0.720285	0.0751954	-0.0408519	0.896	E	racemase	515	264	456	123	486	131	2458
FORC35_1099	745.796	421.579	439.574	442.579	624.907	532.005	0.837906	1.26193	0.589402	1.04981	-0.25514	0.335634	-0.762676	0.07013	0.833	K	transcriptional regulator	1189	316	589	159	840	326	2456
FORC35_1100	8781.45	2564.16	2478.48	3749.39	543.074	256.211	0.0618433	0.0999198	0.28224	1.46223	-4.01524	-3.32309	-1.825	0.548169	0.003	E	diaminopimelate decarboxylase	14000	1922	3321	1347	730	157	2454
FORC35_1101	1707.37	1214.04	1692.62	2733.41	1476.71	1724.93	0.864908	1.42082	0.991364	2.2515	-0.209381	0.506723	-0.0125128	1.17088	0.862	K	transcriptional regulator	2722	910	2268	982	1985	1057	2452
FORC35_1102	1556.2	3005.75	2377.73	2733.41	2246.69	3161.02	1.4437	1.05166	1.52791	0.909393	0.529774	0.0726631	0.611558	-0.137025	0.661	I	2-acyl-glycerophospho-ethanolamine acyltransferase	2481	2253	3186	982	3020	1937	2450
FORC35_1103	551.977	989.911	687.347	1038.25	1043	1150.5	1.88957	1.16223	1.24525	1.04883	0.918058	0.216891	0.316431	0.0687841	0.45		bifunctional aas domain protein	880	742	921	373	1402	705	2448
FORC35_1104	7323.1	8910.54	10021.4	14340.7	12204.3	10351.2	1.66655	1.16169	1.36846	1.60941	0.73686	0.21622	0.452556	0.686528	0.543	C	aldo-keto reductase	11675	6679	13428	5152	16405	6343	2446
FORC35_1105	1856.02	939.215	1435.15	2018.05	657.64	2715.51	0.354328	2.89125	0.773237	2.14865	-1.49684	1.53169	-0.371017	1.10343	0.224		hypothetical protein	2959	704	1923	725	884	1664	2444
FORC35_1106	291.043	336.196	496.293	161.444	305.014	267.634	1.04801	0.796065	1.70523	0.480207	0.0676461	-0.329041	0.769963	-1.05827	0.956	P	membrane protein	464	252	665	58	410	164	2442
FORC35_1107	395.165	418.911	311.956	161.444	408.421	252.947	1.03355	0.60382	0.789431	0.385389	0.0476015	-0.72781	-0.341115	-1.37561	0.969	L	DNA mismatch repair endonuclease MutH	630	314	418	58	549	155	2440
FORC35_1108	4.3907	8.0047	2.9852	2.7835	2.2318	6.5277	0.508302	0.815483	0.679892	0.347733	-0.976243	-0.294273	-0.556623	-1.52395	0.682		hypothetical protein	7	6	4	1	3	4	2438
FORC35_1109	1607.01	2706.91	2235.19	1439.08	3383.42	1000.36	2.10542	0.369559	1.3909	0.53163	1.07411	-1.43612	0.476019	-0.911505	0.378	L	RNA pyrophosphohydrolase	2562	2029	2995	517	4548	613	2436
FORC35_1110	2806.93	4250.48	2927.76	4130.74	3790.36	1920.76	1.35036	0.451893	1.04305	0.971828	0.433342	-1.14595	0.0608033	-0.0412276	0.72	T	phosphoenolpyruvate-protein phosphotransferase	4475	3186	3923	1484	5095	1177	2434
FORC35_1111	504.934	796.465	587.342	523.301	492.486	355.758	0.975348	0.446671	1.16321	0.657029	-0.0360104	-1.16272	0.218108	-0.605971	0.978	M	prolipoprotein diacylglyceryl transferase	805	597	787	188	662	218	2432
FORC35_1112	1378.69	2569.5	1809.04	1795.37	1887.37	835.541	1.36896	0.325176	1.31215	0.698722	0.453079	-1.62071	0.391932	-0.517209	0.708	F	thymidylate synthase	2198	1926	2424	645	2537	512	2430
FORC35_1113	10.036	13.3411	29.8522	30.6187	17.8545	39.166	1.77905	2.93574	2.97451	2.29507	0.831103	1.55372	1.57265	1.19854	0.581	U	hypothetical protein	16	10	40	11	24	24	2428
FORC35_1114	50.807	73.3762	85.8251	41.7527	53.5635	50.5894	1.05425	0.689452	1.68924	0.569022	0.076223	-0.536477	0.756372	-0.813443	0.963	U	hypothetical protein	81	55	115	15	72	31	2426
FORC35_1115	33.8713	92.0537	55.2266	66.8043	47.612	47.3256	1.40567	0.514109	1.63048	0.72571	0.491262	-0.959855	0.7053	-0.462535	0.71		hypothetical protein	54	69	74	24	64	29	2424
FORC35_1116	23.8354	48.028	37.3153	33.4022	28.2696	35.9021	1.18603	0.747524	1.56554	0.695473	0.246146	-0.419807	0.646661	-0.523933	0.879	U	hypothetical protein	38	36	50	12	38	22	2422
FORC35_1117	2149.57	4295.84	2837.45	3963.72	3797.05	1800	1.76642	0.419011	1.32001	0.922689	0.820829	-1.25494	0.400546	-0.116084	0.498	L	exodeoxyribonuclease V gamma chain	3427	3220	3802	1424	5104	1103	2420
FORC35_1118	1484.07	2834.99	1818	2315.88	2238.51	1233.73	1.50836	0.435179	1.22501	0.816894	0.592981	-1.20032	0.292798	-0.29178	0.624	O	protease	2366	2125	2436	832	3009	756	2418
FORC35_1119	2374.13	7273.58	4327.83	6691.57	5862.22	2292.84	2.46921	0.315229	1.82291	0.919983	1.30405	-1.66553	0.866244	-0.120321	0.286	L	exonuclease V subunit beta	3785	5452	5799	2404	7880	1405	2416
FORC35_1121	26673	9972.49	9981.09	6850.23	13272.6	791.479	0.497603	0.0793662	0.374202	0.686913	-1.00693	-3.65533	-1.41811	-0.541801	0.407	E	N-acetylglutamate synthase	42524	7475	13374	2461	17841	485	2412
FORC35_1122	1961.4	903.194	1119.46	512.167	1040.77	507.526	0.530625	0.561923	0.570744	0.567062	-0.914236	-0.831555	-0.809083	-0.818423	0.452	M	N-acetylmuramoyl-L-alanine amidase	3127	677	1500	184	1399	311	2410
FORC35_1123	570.794	768.449	846.311	709.796	894.956	703.356	1.56791	0.915293	1.48269	0.923674	0.648845	-0.127694	0.568216	-0.114544	0.593	M	murein transglycosylase A	910	576	1134	255	1203	431	2402
FORC35_1124	120.431	242.808	164.187	167.011	228.389	137.081	1.89642	0.564564	1.36333	0.68783	0.923279	-0.824791	0.44713	-0.539876	0.452	H	sulfur acceptor protein CsdL	192	182	220	60	307	84	2400
FORC35_1125	402.065	344.201	545.549	665.26	583.99	690.3	1.45248	2.00552	1.35687	1.93277	0.538516	1.00397	0.440281	0.950667	0.658	R	CsdA-binding activator	641	258	731	239	785	423	2398
FORC35_1126	1325.37	1190.03	1370.22	1066.09	1994.49	1517.68	1.50486	1.27533	1.03384	0.895849	0.589626	0.350873	0.0480069	-0.158672	0.626	E	cysteine sulfinate desulfinase	2113	892	1836	383	2681	930	2396
FORC35_1127	3993.05	1001.92	1038.11	3103.62	629.371	2986.41	0.157616	2.98069	0.259979	3.09768	-2.66551	1.57565	-1.94353	1.63119	0.037		hypothetical protein	6366	751	1391	1115	846	1830	2394
FORC35_1128	1270.17	1228.72	1135.13	829.487	1417.2	1152.13	1.11575	0.937671	0.893681	0.675084	0.158016	-0.0928465	-0.162168	-0.566861	0.896	K	transcriptional regulator	2025	921	1521	298	1905	706	2392
FORC35_1129	336.832	286.834	310.463	314.537	311.709	481.415	0.925417	1.67837	0.921716	1.09658	-0.111825	0.747065	-0.117605	0.133014	0.928	S	membrane protein	537	215	416	113	419	295	2390
FORC35_1130	951.533	797.799	1058.26	1238.66	999.107	1431.19	1.05	1.79392	1.11216	1.5526	0.0703855	0.843118	0.15337	0.634687	0.954	R	23S rRNA methyltransferase	1517	598	1418	445	1343	877	2388
FORC35_1131	588.985	548.32	478.382	1233.1	703.764	781.688	1.19488	1.4256	0.812215	2.24886	0.256862	0.511574	-0.300067	1.1692	0.832	K	transcriptional regulator	939	411	641	443	946	479	2386
FORC35_1132	1061.93	1202.04	1131.4	1809.28	1363.64	1070.54	1.28411	0.890603	1.06542	1.50518	0.360772	-0.167145	0.0914214	0.58994	0.765	G	L-fucose mutarotase	1693	901	1516	650	1833	656	2384
FORC35_1133	397.674	504.294	435.842	765.466	457.521	497.734	1.15049	0.986991	1.09598	1.5179	0.202251	-0.0188907	0.132219	0.602073	0.868	G	L-fuculokinase	634	378	584	275	615	305	2382
FORC35_1134	143.012	169.432	145.53	214.331	169.618	339.438	1.18604	2.00339	1.0176	1.26499	0.246148	1.00244	0.0251744	0.33913	0.843	G	fucose isomerase	228	127	195	77	228	208	2380
FORC35_1135	35.1258	42.6916	43.2857	155.877	57.2831	104.443	1.6308	2.44644	1.23231	3.65123	0.705578	1.29069	0.301359	1.86838	0.573	G	H+ symporter permease	56	32	58	56	77	64	2378
FORC35_1136	58.3339	56.0327	69.4064	108.557	54.3074	102.811	0.930975	1.83483	1.18981	1.93739	-0.103186	0.87565	0.250734	0.954113	0.954	G	fuculose phosphate aldolase	93	42	93	39	73	63	2376
FORC35_1137	242.117	558.993	361.212	2624.85	679.214	1157.03	2.80531	2.06984	1.49189	4.69568	1.48816	1.04952	0.57714	2.23134	0.227	C	L-1,2-propanediol oxidoreductase	386	419	484	943	913	709	2374
FORC35_1138	250.271	228.133	214.19	189.279	224.669	164.823	0.897701	0.722488	0.85583	0.829686	-0.155693	-0.468954	-0.224604	-0.269362	0.902	L	endonuclease	399	171	287	68	302	101	2372
FORC35_1139	365.058	508.297	423.902	350.723	472.4	331.279	1.29404	0.651743	1.16119	0.689996	0.371885	-0.617625	0.215605	-0.53534	0.758	E	L-serine dehydratase	582	381	568	126	635	203	2370
FORC35_1140	800.994	821.813	704.513	570.62	788.573	496.102	0.984493	0.603668	0.879548	0.694343	-0.0225469	-0.728173	-0.185166	-0.526279	0.986	E	serine/threonine transporter	1277	616	944	205	1060	304	2368
FORC35_1141	0	0	0	0	0.7439	0	-	-	-	-	-	-	-	-	1		hypothetical protein	0	0	0	0	1	0	2366
FORC35_1142	13433.1	9349.46	13554.4	29970.1	11882.2	13841.9	0.884542	1.4805	1.00903	3.20554	-0.176997	0.566088	0.0129677	1.68057	0.883	S	LOG family protein	21416	7008	18162	10767	15972	8482	2364
FORC35_1143	730.742	1331.44	1114.98	537.218	1072.01	755.577	1.46702	0.567487	1.52582	0.403485	0.552888	-0.817341	0.609584	-1.30941	0.648	R	7-cyano-7-deazaguanine reductase	1165	998	1494	193	1441	463	2362
FORC35_1144	942.752	1135.33	981.392	645.775	894.212	719.675	0.948513	0.633891	1.04099	0.5688	-0.0762608	-0.657694	0.0579515	-0.814007	0.95		SecY interacting protein Syd	1503	851	1315	232	1202	441	2360
FORC35_1146	70.2516	126.741	118.663	61.2373	154.739	60.3809	2.20264	0.476413	1.68911	0.48317	1.13923	-1.06972	0.756262	-1.0494	0.361	S	hypothetical protein	112	95	159	22	208	37	2358
FORC35_1147	175.002	317.519	308.971	189.279	433.715	179.511	2.47835	0.565355	1.76553	0.596119	1.30938	-0.822772	0.820099	-0.746327	0.287	J	tRNA pseudouridine synthase C	279	238	414	68	583	110	2356
FORC35_1148	731.37	1215.38	1095.58	871.24	1606.9	347.598	2.19712	0.286	1.49798	0.716848	1.13561	-1.80591	0.583018	-0.480261	0.352	C	flavodoxin	1166	911	1468	313	2160	213	2354
FORC35_1149	0	0	0	0	0.7439	0	-	-	-	-	-	-	-	-	1		hypothetical protein	0	0	0	0	1	0	2352
FORC35_1151	100.987	92.0537	140.305	125.258	67.6983	241.524	0.670368	2.62372	1.38935	1.36071	-0.576974	1.39162	0.474406	0.444357	0.642	G	glucarate transporter	161	69	188	45	91	148	2350
FORC35_1152	169.357	193.446	200.756	158.66	162.178	310.064	0.957614	1.60284	1.18541	0.820177	-0.0624843	0.680633	0.24538	-0.285992	0.961	M	glucarate dehydratase	270	145	269	57	218	190	2348
FORC35_1153	748.933	661.72	908.254	1450.21	656.152	1480.15	0.876117	2.23682	1.21273	2.19158	-0.190805	1.16145	0.27826	1.13197	0.875	M	glucarate dehydratase	1194	496	1217	521	882	907	2346
FORC35_1154	1310.32	1721	1194.84	1756.4	1938.7	1266.37	1.47956	0.73583	0.911866	1.02057	0.565172	-0.442556	-0.133106	0.0293684	0.64	T	sensory histidine kinase	2089	1290	1601	631	2606	776	2344
FORC35_1155	1458.35	1743.68	1252.3	2107.12	1778.01	2552.32	1.21919	1.46375	0.858712	1.20843	0.285927	0.549668	-0.219754	0.273134	0.813	J	23S rRNA methyltransferase	2325	1307	1678	757	2390	1564	2342
FORC35_1156	6184.65	10995.8	7648.14	12361.6	9279.12	7009.08	1.50035	0.637435	1.23663	1.12421	0.585296	-0.64965	0.306416	0.168918	0.628	K	GTP pyrophosphokinase	9860	8242	10248	4441	12473	4295	2340
FORC35_1157	249.644	306.846	329.121	350.723	518.524	217.045	2.07705	0.707342	1.31836	1.14299	1.05454	-0.499521	0.398744	0.192817	0.388	K	antitoxin MazE	398	230	441	126	697	133	2338
FORC35_1158	441.582	613.692	483.606	567.837	720.875	434.089	1.63248	0.707341	1.09517	0.925281	0.707069	-0.499521	0.131152	-0.112037	0.56	T	toxin	704	460	648	204	969	266	2336
FORC35_1159	1624.57	1658.3	1624.71	2212.89	1913.41	2694.29	1.17779	1.62473	1.00009	1.33443	0.236086	0.7002	0.000122989	0.416228	0.845	R	nucleoside triphosphate pyrophosphohydrolase	2590	1243	2177	795	2572	1651	2334
FORC35_1160	11455.4	24274.2	22569.8	16531.3	18143.9	18871.5	1.58387	0.77743	1.97023	0.681024	0.663454	-0.363215	0.978363	-0.554223	0.583	F	CTP synthetase	18263	18195	30242	5939	24389	11564	2332
FORC35_1161	51113.1	131546	159928	233075	97685.6	98061.8	1.91117	0.745456	3.12891	1.77181	0.934454	-0.423806	1.64566	0.825224	0.441	G	enolase	81488	98602	214293	83734	131309	60090	2330
FORC35_1162	50.1797	16.0094	41.0468	2.7835	11.903	16.3192	0.237207	1.01935	0.817996	0.173867	-2.07578	0.0276511	-0.289834	-2.52395	0.112	S	hypothetical protein	80	12	55	1	16	10	2328
FORC35_1163	0.6273	0	1.4926	0	0	0	0	-	2.3794	-	-	-	1.2506	-	1		hypothetical protein	1	0	2	0	0	0	2326
FORC35_1164	1602.62	1763.7	1887.41	2521.86	1370.33	2800.37	0.85506	1.58778	1.1777	1.42987	-0.225903	0.667014	0.235977	0.515888	0.852	O	coenzyme PQQ biosynthesis protein	2555	1322	2529	906	1842	1716	2324
FORC35_1166	129.213	148.087	123.887	75.1549	125.725	96.283	0.97301	0.650181	0.95878	0.507507	-0.039474	-0.621087	-0.0607277	-0.978501	0.98	G	sugar kinase	206	111	166	27	169	59	2322
FORC35_1167	99.7322	77.3785	79.8547	75.1549	55.7953	94.6511	0.559451	1.22322	0.800691	0.971263	-0.837916	0.290687	-0.320682	-0.0420656	0.505	P	membrane protein	159	58	107	27	75	58	2320
FORC35_1168	17.5629	16.0094	8.2094	30.6187	26.0378	22.8468	1.48255	1.42709	0.467428	1.91255	0.568076	0.513073	-1.09718	0.935494	0.692	I	oxidoreductase	28	12	11	11	35	14	2318
FORC35_1169	279.125	192.112	210.458	130.825	146.556	323.119	0.525054	1.68193	0.753993	0.680983	-0.929462	0.750118	-0.407377	-0.554309	0.449	C	FAD-linked oxidoreductase	445	144	282	47	197	198	2316
FORC35_1170	57.0795	54.6986	61.9434	66.8043	40.9165	70.1724	0.716834	1.28289	1.08521	1.22132	-0.48029	0.3594	0.117978	0.288437	0.706	G	major facilitator transporter	91	41	83	24	55	43	2314
FORC35_1171	56.4522	57.3668	70.899	75.1549	75.8816	66.9085	1.34417	1.16633	1.25591	1.31008	0.42672	0.221973	0.328735	0.389651	0.741	C	electron transfer flavoprotein subunit YgcR	90	43	95	27	102	41	2312
FORC35_1172	77.7786	56.0327	73.138	89.0725	89.2724	60.3809	1.14778	1.0776	0.940336	1.58965	0.198841	0.107823	-0.0887521	0.668711	0.877	C	electron transfer flavoprotein	124	42	98	32	120	37	2310
FORC35_1173	52.0615	30.6846	41.7931	33.4022	34.965	29.3745	0.67161	0.957304	0.802764	1.08857	-0.574305	-0.0629505	-0.316952	0.122428	0.655	K	hypothetical protein	83	23	56	12	47	18	2308
FORC35_1174	24.4626	12.007	20.1503	36.1857	21.5742	26.1107	0.881926	2.17462	0.823719	3.01372	-0.181271	1.12077	-0.279776	1.59154	0.919	C	hypothetical protein	39	9	27	13	29	16	2306
FORC35_1175	99.105	89.3855	137.32	306.187	153.251	101.179	1.54635	1.13194	1.3856	3.42546	0.628867	0.178794	0.470514	1.7763	0.611	C	FAD-dependent oxidoreductase	158	67	184	110	206	62	2304
FORC35_1176	129.84	82.715	147.022	61.2373	136.14	52.2213	1.04852	0.63134	1.13233	0.740341	0.0683592	-0.663511	0.179298	-0.433738	0.961	H	6-carboxy-5,6,7,8-tetrahydropterin synthase	207	62	197	22	183	32	2302
FORC35_1178	24034.2	11321.3	5504	13463.9	12055.5	3688.13	0.501597	0.32577	0.229007	1.18925	-0.995398	-1.61808	-2.12654	0.250055	0.413	P	sulfite reductase subunit alpha	38317	8486	7375	4837	16205	2260	2300
FORC35_1179	26336.2	15759.9	14182	30276.3	27827.7	4686.86	1.05663	0.297392	0.5385	1.9211	0.0794743	-1.74956	-0.892982	0.941933	0.947	C	sulfite reductase subunit beta	41987	11813	19003	10877	37406	2872	2298
FORC35_1180	13921.7	8274.16	12894.7	16358.7	13472.7	2831.37	0.967745	0.342195	0.926225	1.97708	-0.0473009	-1.54711	-0.110565	0.983374	0.969	P	phosphoadenosine phosphosulfate reductase	22195	6202	17278	5877	18110	1735	2296
FORC35_1181	18.8174	17.3435	18.6576	52.8868	20.8302	26.1107	1.10696	1.5055	0.991508	3.04937	0.146609	0.590246	-0.0123039	1.60851	0.969		Hok/gef family protein	30	13	25	19	28	16	2294
FORC35_1182	195.074	92.0537	158.963	203.197	130.189	305.168	0.667384	3.31511	0.814887	2.20737	-0.583412	1.72906	-0.295327	1.14233	0.635	L	helicase	311	69	213	73	175	187	2292
FORC35_1183	462.908	309.514	439.574	411.96	317.661	602.177	0.686229	1.94556	0.949593	1.33099	-0.543238	0.960182	-0.0746194	0.4125	0.655		CRISPR-associated protein CasA	738	232	589	148	427	369	2290
FORC35_1184	183.156	205.453	148.515	189.279	175.569	166.455	0.958577	0.810186	0.810865	0.921275	-0.061034	-0.303675	-0.302466	-0.118296	0.964		transposase	292	154	199	68	236	102	2288
FORC35_1185	262.189	270.825	314.941	300.62	280.464	314.96	1.0697	1.16296	1.2012	1.11002	0.0972089	0.217807	0.264474	0.150579	0.938		CRISPR-associated protein Cse4	418	203	422	108	377	193	2286
FORC35_1186	306.096	397.565	365.69	495.466	391.311	407.979	1.27839	1.02619	1.19469	1.24625	0.354329	0.0373023	0.256634	0.317593	0.771		cytoplasmic protein	488	298	490	178	526	250	2284
FORC35_1187	315.505	444.259	361.958	489.899	438.179	318.224	1.38882	0.716301	1.14723	1.10273	0.473856	-0.481362	0.19816	0.141081	0.698		CRISPR-associated protein Cas6	503	333	485	176	589	195	2282
FORC35_1188	319.269	410.907	298.522	283.918	326.588	324.751	1.02293	0.790329	0.935019	0.690956	0.0327029	-0.339476	-0.096932	-0.533334	0.98	L	CRISPR-associated protein Cas1	509	308	400	102	439	199	2280
FORC35_1189	56.4522	46.6939	64.9286	41.7527	74.3937	44.0617	1.31782	0.943629	1.15015	0.894179	0.398151	-0.0837089	0.201824	-0.161365	0.758		ssRNA endonuclease	90	35	87	15	100	27	2278
FORC35_1190	0.6273	2.6682	2.2389	8.3505	4.4636	3.2638	7.11557	1.22322	3.56911	3.12964	2.83098	0.290686	1.83556	1.646	0.298		hypothetical protein	1	2	3	3	6	2	2276
FORC35_1192	707.534	587.009	487.338	551.136	633.09	646.239	0.894784	1.1009	0.688783	0.938888	-0.160389	0.138683	-0.537878	-0.0909755	0.895	R	alkaline phosphatase isozyme conversion aminopeptidase	1128	440	653	198	851	396	2274
FORC35_1193	23925.1	10069.9	6001.04	13302.4	13166.9	5749.24	0.550341	0.570934	0.250827	1.32101	-0.861603	-0.808604	-1.99524	0.401642	0.477	P	sulfate adenylyltransferase subunit 2	38143	7548	8041	4779	17699	3523	2272
FORC35_1194	45454.7	25137.3	20966	44767.3	40609.3	9768.65	0.893401	0.388611	0.46125	1.78091	-0.162619	-1.3636	-1.11638	0.832612	0.893	P	sulfate adenylyltransferase subunit 1	72467	18842	28093	16083	54587	5986	2270
FORC35_1195	6943.62	4435.92	2966.56	5505.79	6019.19	1349.59	0.866867	0.304242	0.427236	1.24118	-0.206118	-1.71671	-1.22689	0.311716	0.864	P	adenylylsulfate kinase	11070	3325	3975	1978	8091	827	2268
FORC35_1196	863.091	530.977	371.66	306.187	578.039	279.058	0.669731	0.525555	0.430615	0.576648	-0.578347	-0.928085	-1.21553	-0.794237	0.633		membrane protein	1376	398	498	110	777	171	2266
FORC35_1197	33.2441	34.6869	35.8227	44.5362	23.062	68.5405	0.693717	1.97598	1.07757	1.28395	-0.527581	0.982566	0.107776	0.360588	0.695		hypothetical protein	53	26	48	16	31	42	2264
FORC35_1198	740.778	587.009	760.485	715.363	505.133	1158.66	0.681895	1.97384	1.0266	1.21866	-0.552378	0.981002	0.0378787	0.285292	0.649	D	cell division protein FtsB	1181	440	1019	257	679	710	2262
FORC35_1199	1130.93	1195.36	1067.96	862.889	977.533	913.873	0.864365	0.764514	0.944327	0.721863	-0.210287	-0.387385	-0.0826421	-0.470203	0.862	I	2-C-methyl-D-erythritol 4-phosphate cytidylyltransferase	1803	896	1431	310	1314	560	2260
FORC35_1200	989.795	1506.21	1042.59	1725.78	1350.99	1062.38	1.36492	0.70533	1.05334	1.14577	0.448814	-0.50363	0.0749685	0.196322	0.711	I	2-C-methyl-D-erythritol 2,4-cyclodiphosphate synthase	1578	1129	1397	620	1816	651	2258
FORC35_1201	2546.62	3048.45	2721.78	4019.39	4241.93	2454.4	1.66571	0.805132	1.06878	1.31851	0.736136	-0.312703	0.0959641	0.398904	0.543	S	tRNA pseudouridine synthase D	4060	2285	3647	1444	5702	1504	2256
FORC35_1202	1807.72	1989.16	1680.68	2822.48	2598.57	1693.93	1.43748	0.851579	0.929721	1.41893	0.523544	-0.231787	-0.10513	0.504805	0.665	F	stationary phase survival protein SurE	2882	1491	2252	1014	3493	1038	2254
FORC35_1203	1040.6	1250.06	1279.17	2137.74	1624.76	1493.2	1.56136	1.1945	1.22926	1.7101	0.642806	0.256409	0.297787	0.774085	0.595	O	protein-L-isoaspartate O-methyltransferase	1659	937	1714	768	2184	915	2252
FORC35_1204	26350	69235.1	16945.6	148147	20581.8	80623.2	0.781091	1.16448	0.643097	2.13977	-0.356437	0.219691	-0.636891	1.09745	0.767	M	murein hydrolase activator NlpD	42009	51896	22706	53223	27666	49404	2250
FORC35_1205	45433.4	135484	57340.9	235354	43634.1	154389	0.960399	1.13953	1.26209	1.73713	-0.0582949	0.188443	0.335813	0.796708	0.961	K	RNA polymerase sigma factor RpoS	72433	101554	76833	84553	58653	94606	2248
FORC35_1206	192.565	204.119	231.355	116.908	180.033	564.643	0.934921	2.76624	1.20144	0.572742	-0.0970843	1.46793	0.264763	-0.804043	0.941	E	transporter	307	153	310	42	242	346	2246
FORC35_1207	241.49	249.479	241.057	286.702	277.488	1354.49	1.14907	5.42927	0.998206	1.1492	0.200465	2.44076	-0.00259092	0.200634	0.873	G	hypothetical protein	385	187	323	103	373	830	2244
FORC35_1208	95.9687	140.082	110.453	150.31	132.421	740.89	1.37983	5.28898	1.15093	1.07301	0.464494	2.40299	0.202799	0.10167	0.704	G	aldolase	153	105	148	54	178	454	2242
FORC35_1209	246.508	280.164	323.897	400.826	298.319	1258.21	1.21018	4.49097	1.31394	1.43069	0.275221	2.16703	0.393899	0.516707	0.822	S	membrane protein	393	210	434	144	401	771	2240
FORC35_1210	121.686	116.068	176.874	431.445	152.507	757.209	1.25328	6.52385	1.45353	3.71718	0.325714	2.70572	0.539563	1.89421	0.793	I	oxidoreductase	194	87	237	155	205	464	2238
FORC35_1211	445.972	354.874	388.825	617.94	501.413	595.649	1.12431	1.67848	0.871859	1.7413	0.169046	0.747157	-0.197833	0.800161	0.89	K	DeoR family transcriptional regulator	711	266	521	222	674	365	2236
FORC35_1212	99.7322	24.014	26.867	25.0516	37.9408	34.2702	0.380427	1.42709	0.269391	1.04321	-1.39431	0.513079	-1.89222	0.061027	0.273		serine/threonine protein phosphatase	159	18	36	9	51	21	2234
FORC35_1213	1139.08	2959.06	1481.42	1603.3	3440.71	729.466	3.0206	0.24652	1.30054	0.541829	1.59484	-2.02023	0.379108	-0.884091	0.196	L	DNA mismatch repair protein MutS	1816	2218	1985	576	4625	447	2232
FORC35_1214	0.6273	0	1.4926	0	0	0	0	-	2.3794	-	-	-	1.2506	-	1		hypothetical protein	1	0	2	0	0	0	2230
FORC35_1215	65.8609	73.3762	103.737	77.9384	75.1376	58.749	1.14085	0.800655	1.57508	1.06218	0.190113	-0.320748	0.655429	0.0870221	0.881		hypothetical protein	105	55	139	28	101	36	2228
FORC35_1216	1911.85	1680.98	2195.63	4050.01	1120.37	5391.85	0.586014	3.20756	1.14843	2.40931	-0.770994	1.68148	0.199668	1.26862	0.525	K	transcriptional regulator	3048	1260	2942	1455	1506	3304	2226
FORC35_1217	1089.53	865.839	1194.84	2315.88	665.08	2289.58	0.610429	2.64435	1.09665	2.67473	-0.712104	1.40291	0.133109	1.41939	0.557	O	carbamoyl dehydratase	1737	649	1601	832	894	1403	2224
FORC35_1218	622.229	611.023	863.476	2210.11	586.222	1439.35	0.942133	2.35564	1.38771	3.61706	-0.0859973	1.23612	0.47271	1.85482	0.944	O	hydrogenase formation protein HypD	992	458	1157	794	788	882	2222
FORC35_1219	23.2081	9.3388	46.271	203.197	48.3559	27.7426	2.08358	2.97068	1.99374	21.7583	1.05906	1.57079	0.99548	4.4435	0.411	O	hydrogenase assembly chaperone	37	7	62	73	65	17	2220
FORC35_1220	172.493	170.766	652.271	1486.4	637.554	217.045	3.69612	1.271	3.78144	8.70427	1.88601	0.345969	1.91894	3.12172	0.13	K	hydrogenase nickel incorporation protein HypB	275	128	874	534	857	133	2218
FORC35_1221	23.8354	28.0164	52.9877	236.599	63.9786	29.3745	2.68418	1.04848	2.22307	8.44501	1.42448	0.0682927	1.15255	3.0781	0.267	O	hydrogenase nickel incorporation protein	38	21	71	85	86	18	2216
FORC35_1222	8.7815	16.0094	24.6281	551.136	12.6469	14.6872	1.44018	0.917411	2.80454	34.4258	0.526244	-0.12436	1.48777	5.10542	0.731		formate hydrogenlyase regulatory protein HycA	14	12	33	198	17	9	2214
FORC35_1223	19.4447	10.6729	27.6133	439.795	5.2076	13.0553	0.267816	1.22322	1.42009	41.2067	-1.90069	0.290683	0.505986	5.36481	0.198	C	hydrogenase-4 component A	31	8	37	158	7	8	2212
FORC35_1224	99.105	108.063	120.901	1951.24	101.919	101.179	1.0284	0.936294	1.21993	18.0565	0.0403989	-0.0949669	0.286802	4.17445	0.981	C	formate hydrogenlyase subunit 3	158	81	162	701	137	62	2210
FORC35_1225	26.3444	41.3575	43.2857	1366.71	29.7575	34.2702	1.12956	0.828633	1.64307	33.0461	0.175757	-0.271194	0.716394	5.04641	0.911	C	formate hydrogenlyase subunit 4	42	31	58	491	40	21	2208
FORC35_1226	97.8505	133.411	149.261	3607.43	119.774	151.768	1.22405	1.1376	1.5254	27.04	0.291661	0.18599	0.609187	4.75702	0.817	C	hydrogenase 3 large subunit	156	100	200	1296	161	93	2206
FORC35_1227	35.7531	33.3528	51.4951	1149.59	43.8923	44.0617	1.22765	1.32108	1.4403	34.4676	0.2959	0.401717	0.526367	5.10717	0.824	C	formate hydrogenlyase complex iron-sulfur subunit	57	25	69	413	59	27	2204
FORC35_1228	112.277	198.783	160.456	1917.84	162.178	140.345	1.44444	0.706021	1.4291	9.64793	0.530515	-0.502218	0.51511	3.27022	0.667	C	formate hydrogenlyase subunit 7	179	149	215	689	218	86	2202
FORC35_1229	132.976	132.077	126.126	1013.2	128.701	133.817	0.96785	1.01317	0.948483	7.67127	-0.0471448	0.0188821	-0.0763069	2.93947	0.97		formate hydrogenlyase maturation protein HycH	212	99	169	364	173	82	2200
FORC35_1230	294.806	254.815	332.106	1007.63	321.381	331.279	1.09014	1.30007	1.12652	3.95436	0.124518	0.378594	0.171878	1.98344	0.922	C	hydrogenase 3 maturation protease	470	191	445	362	432	203	2198
FORC35_1231	180.647	224.131	213.443	283.918	188.96	164.823	1.04602	0.73539	1.18155	1.26675	0.0649076	-0.443419	0.24068	0.341136	0.958		hypothetical protein	288	168	286	102	254	101	2196
FORC35_1233	395.793	262.82	338.076	297.836	321.381	572.802	0.811993	2.17945	0.854176	1.13323	-0.300461	1.12396	-0.227395	0.180443	0.805	K	XRE family transcriptional regulator	631	197	453	107	432	351	2192
FORC35_1235	292.924	262.82	327.628	356.29	268.561	1178.24	0.916828	4.48308	1.11847	1.35564	-0.125276	2.16449	0.161532	0.438976	0.919	G	6-phospho-beta-glucosidase	467	197	439	128	361	722	2190
FORC35_1236	116.668	64.0374	143.291	125.258	81.0891	693.564	0.695042	10.8306	1.22819	1.95602	-0.524828	3.43704	0.296537	0.967918	0.674	G	PTS cellobiose transporter subunit IIBC	186	48	192	45	109	425	2188
FORC35_1237	158.693	252.147	202.249	167.011	176.313	238.26	1.11103	0.944923	1.27446	0.662355	0.151897	-0.0817313	0.349889	-0.594324	0.903	K	transcriptional regulator, LacI family	253	189	271	60	237	146	2186
FORC35_1238	0	1.3341	1.4926	0	0.7439	1.6319	-	1.22322	-	0	-	0.290686	-	-	1		hypothetical protein	0	1	2	0	1	1	2184
FORC35_1239	13.7994	30.6846	30.5985	278.351	12.6469	11.4234	0.916482	0.372284	2.21738	9.07137	-0.125822	-1.42552	1.14886	3.18132	1	C	formate dehydrogenase-H ferredoxin subunit	22	23	41	100	17	7	2182
FORC35_1241	413.983	437.589	647.793	2321.45	520.756	1796.74	1.25792	4.106	1.56478	5.3051	0.331036	2.03773	0.645963	2.40738	0.786	O	carbamoyl phosphate phosphatase	660	328	868	834	700	1101	2180
FORC35_1242	85.3055	102.727	88.8104	108.557	72.1619	89.7554	0.845923	0.873731	1.04109	1.05676	-0.241401	-0.194739	0.0580899	0.0796443	0.854	C	NADH	136	77	119	39	97	55	2178
FORC35_1243	89.6963	116.068	105.229	89.0725	69.1861	153.4	0.771337	1.32164	1.17317	0.767418	-0.374566	0.402332	0.230413	-0.381916	0.767	C	nitric oxide reductase	143	87	141	32	93	94	2176
FORC35_1244	383.875	613.692	582.865	673.611	667.311	515.685	1.73836	0.8403	1.51837	1.09764	0.797724	-0.251023	0.602524	0.134401	0.512	K	anaerobic nitric oxide reductase transcription regulator NorR	612	460	781	242	897	316	2174
FORC35_1245	607.175	896.523	935.867	2048.67	1134.5	1458.93	1.8685	1.62732	1.54135	2.28512	0.901877	0.7025	0.624192	1.19227	0.458	M	arabinose 5-phosphate isomerase	968	672	1254	736	1525	894	2172
FORC35_1246	394.538	777.787	823.175	1711.86	902.395	1150.5	2.28722	1.4792	2.08643	2.20094	1.1936	0.564814	1.06103	1.13812	0.33	K	transcriptional regulator	629	583	1103	615	1213	705	2170
FORC35_1247	53.316	72.0421	82.0936	50.1033	57.2831	102.811	1.07441	1.42709	1.53976	0.695473	0.103541	0.513078	0.622701	-0.523935	0.942	K	transcriptional regulator	85	54	110	18	77	63	2168
FORC35_1248	112.277	246.811	255.983	320.104	380.896	1166.82	3.39246	4.72759	2.27992	1.29696	1.76233	2.2411	1.18898	0.375136	0.157	I	sorbitol-6-phosphate dehydrogenase	179	185	343	115	512	715	2166
FORC35_1249	12.5449	17.3435	35.0764	50.1033	52.0756	233.364	4.15114	13.4554	2.79607	2.88888	2.05351	3.75011	1.4834	1.53051	0.118	G	PTS sorbitol transporter subunit IIA	20	13	47	18	70	143	2164
FORC35_1250	28.8534	61.3692	94.0345	400.826	96.7118	651.134	3.35183	10.6101	3.25904	6.53139	1.74495	3.40737	1.70445	2.70739	0.169	G	PTS sorbitol transporter subunit IIB	46	46	126	144	130	399	2162
FORC35_1251	8.1542	24.014	52.2414	350.723	66.2104	300.272	8.11979	12.5041	6.40669	14.6049	3.02144	3.64432	2.67958	3.86838	0.029	G	glucitol/sorbitol permease IIC component	13	18	70	126	89	184	2160
FORC35_1252	647.318	546.986	703.02	640.208	406.19	1351.23	0.627496	2.47031	1.08605	1.17043	-0.672323	1.30469	0.11909	0.227037	0.58	M	murein hydrolase B	1032	410	942	230	546	828	2158
FORC35_1253	212.009	405.57	362.704	261.65	513.316	269.266	2.4212	0.66392	1.71079	0.645142	1.27572	-0.590919	0.774666	-0.632311	0.299	R	hypothetical protein	338	304	486	94	690	165	2156
FORC35_1254	7159.39	5800.72	8948.2	5528.06	10093.7	4848.42	1.40986	0.835831	1.24986	0.952995	0.495551	-0.258717	0.321761	-0.0694588	0.681	L	recombinase RecA	11414	4348	11990	1986	13568	2971	2154
FORC35_1255	67.1154	73.3762	70.899	38.9692	62.4907	42.4298	0.931093	0.57825	1.05637	0.531088	-0.103002	-0.790234	0.0791214	-0.912978	0.94	R	recombination protein RecX	107	55	95	14	84	26	2152
FORC35_1256	25.0899	21.3458	33.5838	11.1341	40.1726	1.6319	1.60115	0.0764506	1.33854	0.521606	0.679105	-3.70933	0.420659	-0.938967	0.607		hypothetical protein	40	16	45	4	54	1	2150
FORC35_1257	13819.5	35232.6	13101.4	27484.4	32547.2	7780.97	2.35517	0.220846	0.948037	0.780086	1.23583	-2.17889	-0.0769848	-0.358296	0.311	J	alanyl-tRNA synthetase	22032	26409	17555	9874	43750	4768	2148
FORC35_1259	4371.28	6016.85	6136.12	9422.2	4601.99	10467.1	1.05278	1.73963	1.40374	1.56597	0.0742025	0.798783	0.489271	0.647056	0.951	T	carbon storage regulator	6969	4510	8222	3385	6186	6414	2146
FORC35_1261	540.687	832.486	760.485	676.394	855.527	554.851	1.5823	0.666499	1.40652	0.812499	0.662021	-0.585325	0.492128	-0.299562	0.585	S	membrane protein	862	624	1019	243	1150	340	2132
FORC35_1262	12380.6	14084.2	11711.8	18296	11248.3	13706.5	0.908545	0.973178	0.945978	1.29905	-0.13837	-0.039224	-0.080121	0.377452	0.909	H	glutamate--cysteine ligase	19738	10557	15693	6573	15120	8399	2130
FORC35_1263	20264.5	29583.9	26838.6	33777.9	19972.5	23770.5	0.985591	0.803493	1.32442	1.14177	-0.0209386	-0.315643	0.40536	0.191268	0.986	T	S-ribosylhomocysteinase	32307	22175	35962	12135	26847	14566	2128
FORC35_1264	335.577	518.97	523.16	615.157	798.244	535.268	2.37872	1.03141	1.55899	1.18534	1.25019	0.0446122	0.640609	0.245304	0.307	G	multidrug resistance protein B	535	389	701	221	1073	328	2126
FORC35_1265	388.893	591.012	521.668	420.311	623.419	520.581	1.60306	0.88083	1.34142	0.711172	0.680829	-0.183064	0.423758	-0.491731	0.574	V	multidrug transporter	620	443	699	151	838	319	2124
FORC35_1266	40.771	58.7009	58.9581	27.8351	85.5527	37.5341	2.09837	0.639413	1.44608	0.474185	1.06927	-0.645181	0.532147	-1.07648	0.4		hypothetical protein	65	44	79	10	115	23	2122
FORC35_1267	718.825	2143.92	1882.93	1266.5	2425.23	450.409	3.37389	0.210087	2.61946	0.59074	1.75441	-2.25094	1.38927	-0.759404	0.157	K	transcriptional regulator	1146	1607	2523	455	3260	276	2120
FORC35_1268	242.117	294.839	229.862	102.99	363.785	86.4915	1.50252	0.293352	0.949384	0.34931	0.587381	-1.7693	-0.074937	-1.51742	0.628		branched-chain amino acid ABC transporter permease	386	221	308	37	489	53	2118
FORC35_1269	834.238	1198.03	1028.41	1105.06	1587.56	354.126	1.90301	0.295589	1.23275	0.922392	0.928281	-1.75833	0.301883	-0.116549	0.445	E	membrane protein	1330	898	1378	397	2134	217	2116
FORC35_1270	162.457	138.748	188.069	186.495	192.68	365.549	1.18604	2.63463	1.15765	1.34413	0.246148	1.3976	0.211205	0.426677	0.843	G	transporter	259	104	252	67	259	224	2114
FORC35_1271	1.8817	2.6682	2.2389	2.7835	0.7439	4.8958	0.395334	1.83487	1.18983	1.04321	-1.33886	0.875678	0.250753	0.0610333	0.712		hypothetical protein	3	2	3	1	1	3	2112
FORC35_1272	4417.07	812.474	566.446	183.712	618.212	217.045	0.13996	0.267141	0.12824	0.226114	-2.83692	-1.90433	-2.96308	-2.14488	0.027	E	glycine/betaine ABC transporter substrate-binding protein	7042	609	759	66	831	133	2110
FORC35_1273	1833.44	384.224	185.83	100.207	334.028	96.283	0.182186	0.250591	0.101356	0.260802	-2.45651	-1.9966	-3.3025	-1.93897	0.053	E	binding--dependent transport system inner membrane component family protein	2923	288	249	36	449	59	2108
FORC35_1274	3343.22	457.601	216.429	55.6703	316.917	125.657	0.0947938	0.274601	0.0647365	0.121657	-3.39906	-1.86459	-3.94928	-3.03911	0.01	E	glycine betaine/L-proline transport ATP-binding protein ProV	5330	343	290	20	426	77	2106
FORC35_1275	2006.56	10171.3	4693.52	1291.55	6145.66	474.887	3.06278	0.0466891	2.33908	0.12698	1.61484	-4.42077	1.22594	-2.97732	0.19	F	ribonucleotide-diphosphate reductase subunit beta	3199	7624	6289	464	8261	291	2104
FORC35_1276	5189.84	24422.3	11612.5	3799.5	10463.5	1502.99	2.01615	0.061542	2.23755	0.155575	1.0116	-4.02229	1.16192	-2.68432	0.405	F	ribonucleotide-diphosphate reductase subunit alpha	8274	18306	15560	1365	14065	921	2102
FORC35_1277	420.882	1785.04	1894.87	345.156	1258	181.143	2.98895	0.101478	4.50214	0.19336	1.57964	-3.30076	2.17061	-2.37064	0.2	F	ribonucleotide reductase stimulatory protein	671	1338	2539	124	1691	111	2100
FORC35_1278	250.271	915.201	1166.48	194.846	782.622	128.921	3.12709	0.140867	4.66084	0.2129	1.64482	-2.8276	2.22059	-2.23175	0.184	O	glutaredoxin	399	686	1563	70	1052	79	2098
FORC35_1279	9679.04	5898.11	7516.79	18518.7	3696.62	26291.8	0.38192	4.45766	0.776605	3.13977	-1.38866	2.15629	-0.364748	1.65066	0.257	S	membrane protein	15431	4421	10072	6653	4969	16111	2096
FORC35_1280	502.425	317.519	358.227	592.889	347.418	476.519	0.691484	1.50076	0.712996	1.86726	-0.532233	0.585693	-0.488034	0.900919	0.662		hypothetical protein	801	238	480	213	467	292	2094
FORC35_1281	125.449	84.0491	294.791	144.743	1262.46	66.9085	10.0635	0.796064	2.34988	1.72212	3.33106	-0.329043	1.23259	0.784187	0.012		membrane protein	200	63	395	52	1697	41	2092
FORC35_1282	3105.5	1310.1	938.106	91.856	763.279	471.624	0.245783	0.359991	0.302079	0.0701138	-2.02454	-1.47397	-1.727	-3.83416	0.105	R	DNA-binding protein	4951	982	1257	33	1026	289	2090
FORC35_1283	895.708	589.678	567.939	478.764	2231.81	2145.97	2.49167	3.63922	0.634067	0.811909	1.31711	1.86363	-0.657294	-0.30061	0.282	P	membrane protein	1428	442	761	172	3000	1315	2088
FORC35_1284	207.619	136.079	154.485	38.9692	794.525	563.011	3.82685	4.13737	0.744082	0.286371	1.93616	2.04871	-0.426466	-1.80404	0.121	K	transcriptional regulator	331	102	207	14	1068	345	2086
FORC35_1285	353.767	270.825	368.675	818.353	284.184	455.304	0.803308	1.68118	1.04214	3.02171	-0.315975	0.749472	0.0595497	1.59536	0.795	S	membrane protein	564	203	494	294	382	279	2084
FORC35_1286	12697.4	14225.6	18393.4	38315.1	7251.15	48040.3	0.571076	3.37702	1.4486	2.69338	-0.808246	1.75575	0.534664	1.42942	0.505	S	peptidoglycan-binding protein LysM	20243	10663	24646	13765	9747	29438	2082
FORC35_1287	2216.06	879.18	1385.14	1561.55	897.188	1470.36	0.404857	1.67242	0.625047	1.77615	-1.30452	0.741935	-0.677963	0.82875	0.287	K	transcriptional regulator	3533	659	1856	561	1206	901	2080
FORC35_1288	3237.22	855.166	858.998	1647.84	530.427	1729.83	0.163853	2.0228	0.26535	1.92692	-2.60953	1.01635	-1.91403	0.9463	0.041	E	gamma-aminobutyrate transporter	5161	641	1151	592	713	1060	2078
FORC35_1289	9072.5	2761.61	3319.57	7136.93	2986.16	4526.93	0.329145	1.63924	0.365894	2.58433	-1.60321	0.713023	-1.4505	1.36979	0.193	E	4-aminobutyrate aminotransferase	14464	2070	4448	2564	4014	2774	2076
FORC35_1290	9982	4150.42	3701.68	8019.3	3942.87	4078.16	0.394997	0.982588	0.370835	1.93217	-1.34008	-0.025341	-1.43115	0.950219	0.274	C	succinate-semialdehyde dehdyrogenase	15914	3111	4960	2881	5300	2499	2074
FORC35_1291	6407.32	1829.07	1318.72	4773.73	1528.79	2859.12	0.2386	1.56315	0.205815	2.60992	-2.06733	0.644461	-2.28058	1.38401	0.098	C	hypothetical protein	10215	1371	1767	1715	2055	1752	2072
FORC35_1292	7447.3	1531.56	737.35	7111.88	1260.97	7064.56	0.169319	4.61266	0.099009	4.64355	-2.56218	2.2056	-3.3363	2.21523	0.044		carbon starvation induced protein	11873	1148	988	2555	1695	4329	2070
FORC35_1293	2.509	0	0.7463	0	0	0	0	-	0.297449	-	-	-	-1.74928	-	0.234		hypothetical protein	4	0	1	0	0	0	2068
FORC35_1294	228.318	70.7079	151.5	119.691	45.3802	164.823	0.198759	2.33105	0.663549	1.69275	-2.33091	1.22098	-0.591726	0.759373	0.07	G	alpha-amylase	364	53	203	43	61	101	2066
FORC35_1295	122.94	62.7033	76.1232	38.9692	34.965	62.0128	0.284406	0.988988	0.619188	0.621486	-1.81397	-0.0159753	-0.69155	-0.686207	0.152		hypothetical protein	196	47	102	14	47	38	2062
FORC35_1297	0	0	0	0	0	0	-	-	-	-	-	-	-	-	1		ATPase	0	0	0	0	0	0	2060
FORC35_1298	0	0	0	0	1.4879	0	-	-	-	-	-	-	-	-	0.569		membrane protein	0	0	0	0	2	0	2058
FORC35_1301	232.708	189.444	136.574	111.341	178.545	84.8596	0.767247	0.447941	0.586888	0.587723	-0.382237	-1.15862	-0.768842	-0.766791	0.753	L	integrase	371	142	183	40	240	52	2052
FORC35_1302	0.6273	2.6682	4.4778	5.567	0	0	0	0	7.13821	2.08643	-	-	2.83556	1.06103	1		hypothetical protein	1	2	6	2	0	0	2050
FORC35_1303	13.1722	4.0023	4.4778	2.7835	5.2076	6.5277	0.395348	1.63099	0.339943	0.695475	-1.33881	0.705745	-1.55663	-0.523929	0.41		hypothetical protein	21	3	6	1	7	4	2048
FORC35_1304	40.1438	32.0187	20.8966	22.2681	25.2939	17.9511	0.630082	0.560644	0.520544	0.695472	-0.666388	-0.834842	-0.941909	-0.523936	0.607		hypothetical protein	64	24	28	8	34	11	2046
FORC35_1305	949.024	556.325	397.781	520.517	578.783	112.602	0.609872	0.202404	0.419147	0.935635	-0.713423	-2.30469	-1.25447	-0.0959816	0.556	O	putative serine protease	1513	417	533	187	778	69	2044
FORC35_1307	67.1154	73.3762	40.3005	55.6703	64.7225	21.2149	0.964346	0.289125	0.600466	0.758697	-0.0523765	-1.79023	-0.735846	-0.398404	0.98		hypothetical protein	107	55	54	20	87	13	2042
FORC35_1308	6.2725	6.6706	13.4335	5.567	1.4879	1.6319	0.23721	0.244641	2.14165	0.834558	-2.07576	-2.03126	1.09872	-0.260916	0.271		hypothetical protein	10	5	18	2	2	1	2040
FORC35_1309	7.527	2.6682	1.4926	0	2.2318	1.6319	0.296506	0.611611	0.198299	0	-1.75387	-0.709314	-2.33425	-	0.296		hypothetical protein	12	2	2	0	3	1	2038
FORC35_1310	57.0795	30.6846	22.3892	16.7011	22.3181	14.6872	0.391	0.478651	0.392246	0.544283	-1.35476	-1.06296	-1.35017	-0.877572	0.295	K	DNA-binding protein	91	23	30	6	30	9	2036
FORC35_1311	13.7994	24.014	23.1355	5.567	20.0863	11.4234	1.45559	0.475698	1.67656	0.231823	0.541606	-1.07188	0.745503	-2.1089	0.711		transcriptional regulator	22	18	31	2	27	7	9366
FORC35_1314	74.6424	60.0351	53.734	100.207	43.1483	52.2213	0.578067	0.869846	0.719886	1.66913	-0.790692	-0.201168	-0.47416	0.739098	0.531		hypothetical protein	119	45	72	36	58	32	2034
FORC35_1315	435.309	538.981	304.493	431.445	345.931	468.36	0.794678	0.868972	0.699486	0.800482	-0.331558	-0.202618	-0.515633	-0.32106	0.785	L	helicase	694	404	408	155	465	287	2032
FORC35_1316	129.213	124.072	118.663	58.4538	124.237	86.4915	0.961495	0.697105	0.91835	0.471127	-0.0566483	-0.520552	-0.122884	-1.08581	0.969	S	DNA primase	206	93	159	21	167	53	2028
FORC35_1318	172.493	228.133	138.813	214.331	188.216	192.566	1.09115	0.844095	0.804745	0.939498	0.125853	-0.244523	-0.313396	-0.0900386	0.921		hypothetical protein	275	171	186	77	253	118	2026
FORC35_1319	482.353	485.617	400.766	359.073	422.556	525.477	0.876031	1.08208	0.830857	0.739417	-0.190946	0.113809	-0.267328	-0.43554	0.876	O	molecular chaperone	769	364	537	129	568	322	2024
FORC35_1320	1424.48	644.376	441.067	740.415	555.721	1819.59	0.390123	2.82379	0.309634	1.14904	-1.358	1.49763	-1.69136	0.200431	0.269		hypothetical protein	2271	483	591	266	747	1115	2022
FORC35_1321	368.821	437.589	161.948	350.723	157.715	303.536	0.427618	0.693656	0.439097	0.801489	-1.2256	-0.527707	-1.18739	-0.319245	0.319		shiga-like toxin 2 subunit A	588	328	217	126	212	186	2016
FORC35_1322	213.891	98.7243	137.32	236.599	122.75	303.536	0.573888	3.07459	0.64201	2.39656	-0.801158	1.62039	-0.639333	1.26097	0.516		Shiga toxin subunit B	341	74	184	85	165	186	2014
FORC35_1323	0	2.6682	0	0	0.7439	0	-	0	-	0	-	-	-	-	1		hypothetical protein	0	2	0	0	1	0	2012
FORC35_1324	0	0	0.7463	0	0	0	-	-	-	-	-	-	-	-	1		DNA adenine methylase	0	0	1	0	0	0	2010
FORC35_1326	72.1334	57.3668	20.1503	41.7527	29.7575	58.749	0.412534	1.02409	0.279348	0.72782	-1.27741	0.0343483	-1.83987	-0.458347	0.318	L	DNA adenine methylase	115	43	27	15	40	36	2008
FORC35_1330	57.0795	72.0421	38.0616	66.8043	37.9408	58.749	0.664701	0.815482	0.666817	0.927295	-0.589223	-0.294276	-0.584636	-0.108899	0.648		holin	91	54	51	24	51	36	1998
FORC35_1332	35.1258	54.6986	20.1503	80.7219	18.5984	34.2702	0.52948	0.626528	0.573661	1.47576	-0.917353	-0.674549	-0.80173	0.561456	0.487		hypothetical protein	56	41	27	29	25	21	1994
FORC35_1333	0	0	0.7463	2.7835	1.4879	0	-	-	-	-	-	-	-	-	0.569		hypothetical protein	0	0	1	1	2	0	1992
FORC35_1334	2718.49	6549.16	6188.37	17171.5	6911.92	3772.99	2.54256	0.576103	2.2764	2.62194	1.34628	-0.795601	1.18675	1.39064	0.271		hypothetical protein	4334	4909	8292	6169	9291	2312	1990
FORC35_1337	154.93	174.769	248.52	178.145	124.237	94.6511	0.801895	0.541579	1.60408	1.01932	-0.318515	-0.884756	0.681745	0.0276044	0.797		hypothetical protein	247	131	333	64	167	58	1986
FORC35_1338	171.238	615.026	431.365	1021.55	633.834	101.179	3.70147	0.164511	2.51909	1.66099	1.8881	-2.60374	1.3329	0.732041	0.131		hypothetical protein	273	461	578	367	852	62	1984
FORC35_1340	15.0539	25.3481	17.9113	19.4846	12.6469	11.4234	0.840108	0.450661	1.18981	0.768681	-0.251353	-1.14989	0.250733	-0.379543	0.913	L	terminase	24	19	24	7	17	7	1980
FORC35_1341	249.644	272.159	233.594	409.177	194.167	500.998	0.777777	1.84083	0.935706	1.50345	-0.362572	0.880356	-0.095872	0.588274	0.768	R	terminase	398	204	313	147	261	307	1978
FORC35_1342	4.3907	4.0023	4.4778	2.7835	0.7439	1.6319	0.169426	0.407741	1.01984	0.695475	-2.56127	-1.29428	0.0283391	-0.523929	0.298		putative integral membrane protein	7	3	6	1	1	1	1976
FORC35_1343	124.822	108.063	121.648	128.042	64.7225	97.9149	0.518518	0.90609	0.974569	1.18488	-0.947534	-0.142274	-0.0371632	0.24474	0.447	R	putative portal protein	199	81	163	46	87	60	1974
FORC35_1344	60.2157	49.3622	50.7488	36.1857	29.7575	37.5341	0.494182	0.760381	0.842784	0.733065	-1.01689	-0.395205	-0.246766	-0.447987	0.433	R	putative prohead protease	96	37	68	13	40	23	1972
FORC35_1345	232.081	244.143	212.697	331.238	198.631	283.953	0.855869	1.16306	0.916477	1.35674	-0.224539	0.21793	-0.12583	0.440146	0.856	R	capsid protein	370	183	285	119	267	174	1970
FORC35_1346	31.3623	29.3505	18.6576	44.5362	20.8302	34.2702	0.66418	1.16762	0.594905	1.51739	-0.590355	0.22357	-0.749268	0.601593	0.673		hypothetical protein	50	22	25	16	28	21	1968
FORC35_1347	64.6064	74.7103	60.4508	77.9384	56.5392	115.866	0.875133	1.55087	0.935678	1.04321	-0.192426	0.633078	-0.0959157	0.0610272	0.884	R	hypothetical protein	103	56	81	28	76	71	1966
FORC35_1348	85.3055	94.722	71.6453	102.99	47.612	101.179	0.558135	1.06817	0.839867	1.08729	-0.841314	0.0951356	-0.251767	0.120733	0.505		hypothetical protein	136	71	96	37	64	62	1964
FORC35_1349	142.385	148.087	126.126	114.124	110.847	133.817	0.778499	0.903641	0.885807	0.770658	-0.361233	-0.146178	-0.174935	-0.375837	0.772		hypothetical protein	227	111	169	41	149	82	1962
FORC35_1350	0	0	0	0	0	0	-	-	-	-	-	-	-	-	1		hypothetical protein	0	0	0	0	0	0	1960
FORC35_1351	371.33	381.556	290.313	347.939	297.575	261.106	0.801375	0.68432	0.781819	0.911896	-0.31945	-0.547257	-0.355093	-0.13306	0.794	R	phage tail sheath protein	592	286	389	125	400	160	1958
FORC35_1352	108.514	158.759	88.8104	180.928	82.577	127.289	0.760982	0.801776	0.818426	1.13964	-0.394065	-0.31873	-0.289077	0.188577	0.753		hypothetical protein	173	119	119	65	111	78	1956
FORC35_1353	80.2876	89.3855	82.8399	111.341	83.3209	71.8043	1.03778	0.80331	1.03179	1.24562	0.0535012	-0.315971	0.0451486	0.316867	0.976		hypothetical protein	128	67	111	40	112	44	1954
FORC35_1354	378.857	289.502	365.69	361.857	287.16	494.47	0.757963	1.708	0.965245	1.24993	-0.399801	0.772309	-0.0510334	0.321844	0.741	S	transglycosylase	604	217	490	130	386	303	1952
FORC35_1355	286.024	225.465	142.544	172.578	247.731	52.2213	0.866118	0.231616	0.498364	0.765431	-0.207364	-2.11019	-1.00473	-0.385656	0.866		hypothetical protein	456	169	191	62	333	32	1950
FORC35_1356	610.938	252.147	221.653	186.495	299.807	186.038	0.490731	0.737817	0.362807	0.739629	-1.02699	-0.438666	-1.46272	-0.435125	0.401	L	hypothetical protein	974	189	297	67	403	114	1948
FORC35_1357	350.631	197.449	151.5	186.495	164.41	168.087	0.468898	0.851296	0.432078	0.944527	-1.09266	-0.232266	-1.21064	-0.0823363	0.374	R	baseplate protein	559	148	203	67	221	103	1946
FORC35_1358	125.449	65.3715	71.6453	116.908	82.577	79.9639	0.65825	1.22322	0.57111	1.78836	-0.603293	0.290687	-0.80816	0.838635	0.626	S	baseplate assembly protein	200	49	96	42	111	49	1944
FORC35_1359	13.1722	17.3435	33.5838	11.1341	16.3666	26.1107	1.24251	1.5055	2.5496	0.641975	0.313258	0.590246	1.35027	-0.63941	0.835	S	hypothetical protein	21	13	45	4	22	16	1942
FORC35_1360	184.411	110.731	150.007	214.331	133.165	197.462	0.72211	1.78325	0.813443	1.93559	-0.469709	0.834511	-0.297887	0.952775	0.703	S	hypothetical protein	294	83	201	77	179	121	1940
FORC35_1361	237.726	169.432	199.264	275.568	204.583	248.051	0.86058	1.46401	0.838205	1.62642	-0.216619	0.54993	-0.254625	0.7017	0.862	S	phage tail protein	379	127	267	99	275	152	1938
FORC35_1365	609.684	394.897	318.673	406.393	313.197	662.558	0.513705	1.6778	0.522685	1.02911	-0.960989	0.746569	-0.935986	0.0413988	0.431		hypothetical protein	972	296	427	146	421	406	1928
FORC35_1367	1214.98	1826.4	1384.4	740.415	2062.94	724.571	1.69792	0.396721	1.13944	0.405396	0.763771	-1.3338	0.188329	-1.3026	0.529	O	SsrA-binding protein	1937	1369	1855	266	2773	444	1926
FORC35_1368	1049.38	819.145	731.38	322.888	1217.82	386.764	1.16051	0.472156	0.696961	0.394177	0.214764	-1.08267	-0.52085	-1.34309	0.859	I	hypothetical protein	1673	614	980	116	1637	237	1924
FORC35_1369	320.523	234.804	223.145	94.6395	290.879	115.866	0.907515	0.493459	0.696192	0.403058	-0.140007	-1.019	-0.522444	-1.31094	0.911	S	hypothetical protein	511	176	299	34	391	71	1922
FORC35_1370	2104.41	2226.63	2070.25	896.292	2216.19	1179.87	1.05311	0.529892	0.983767	0.402532	0.0746627	-0.91623	-0.0236113	-1.31282	0.951	M	outer membrane biogenesis protein BamE	3355	1669	2774	322	2979	723	1920
FORC35_1371	5824.61	1770.37	1721.73	1645.06	1987.8	2496.83	0.341276	1.41035	0.295595	0.929218	-1.55099	0.49605	-1.75831	-0.105911	0.208	L	DNA repair protein RecN	9286	1327	2307	591	2672	1530	1918
FORC35_1372	1925.65	1415.49	2120.25	1038.25	1494.57	2332.01	0.776139	1.64749	1.10106	0.733491	-0.365614	0.720268	0.138894	-0.447149	0.762	G	inorganic polyphosphate/ATP-NAD kinase	3070	1061	2841	373	2009	1429	1916
FORC35_1373	15.0539	12.007	26.1207	5.567	13.3909	37.5341	0.88953	3.12602	1.73515	0.463646	-0.168884	1.64433	0.795056	-1.1089	0.958		hypothetical protein	24	9	35	2	18	23	1914
FORC35_1374	1085.76	4673.39	3189.71	3117.54	3497.99	5215.6	3.22169	1.11602	2.93776	0.667082	1.68782	0.158363	1.55471	-0.584065	0.172	O	protein grpE	1731	3503	4274	1120	4702	3196	1912
FORC35_1375	829.847	1480.86	1394.85	940.828	1401.58	435.721	1.68896	0.294235	1.68085	0.635323	0.756133	-1.76496	0.749187	-0.654437	0.533	P	inner membrane protein	1323	1110	1869	338	1884	267	1910
FORC35_1376	1044.99	1624.95	1654.56	526.084	1263.95	683.773	1.20953	0.420796	1.58332	0.323754	0.274445	-1.24881	0.662954	-1.62703	0.82	O	inner membrane protein ypjD	1666	1218	2217	189	1699	419	1908
FORC35_1377	3326.92	4725.43	4597.99	3198.26	4937.51	3066.37	1.48411	0.648909	1.38206	0.676819	0.569598	-0.623913	0.466817	-0.563158	0.637	U	signal recognition particle protein Srp54	5304	3542	6161	1149	6637	1879	1906
FORC35_1378	344.986	4245.14	2488.18	1678.46	5786.34	270.898	16.7727	0.0638136	7.21242	0.395383	4.06804	-3.96999	2.85048	-1.33868	0.003	J	30S ribosomal protein S16	550	3182	3334	603	7778	166	1904
FORC35_1379	2172.16	33673	18057.6	12531.4	41920.1	1646.6	19.2989	0.0488998	8.31322	0.372149	4.27044	-4.35403	3.05541	-1.42605	0.002	J	16S rRNA-processing protein M	3463	25240	24196	4502	56349	1009	1902
FORC35_1380	2323.32	33514.2	20770.4	12386.6	46943.9	1462.2	20.2055	0.0436291	8.93997	0.369593	4.33668	-4.51856	3.16027	-1.43599	0.002	J	tRNA (guanine-N1)-methyltransferase	3704	25121	27831	4450	63102	896	1900
FORC35_1381	780.295	14818	8301.9	6502.29	19819.2	656.03	25.3997	0.0442726	10.6394	0.438811	4.66674	-4.49744	3.41135	-1.18833	0.001	J	50S ribosomal protein L19	1244	11107	11124	2336	26641	402	1898
FORC35_1382	435.936	282.832	284.342	389.692	464.217	248.051	1.06487	0.877027	0.652257	1.37782	0.0906804	-0.189306	-0.616488	0.46239	0.941	M	membrane protein	695	212	381	140	624	152	1896
FORC35_1383	753.323	493.622	497.786	342.372	729.802	559.747	0.968777	1.13396	0.660786	0.693593	-0.0457637	0.18137	-0.597744	-0.527839	0.971	T	diguanylate cyclase	1201	370	667	123	981	343	1894
FORC35_1384	371.957	205.453	201.502	94.6395	459.009	208.885	1.23404	1.0167	0.541736	0.460638	0.303385	0.0238998	-0.884339	-1.1183	0.802		hypothetical protein	593	154	270	34	617	128	1892
FORC35_1385	1180.48	799.133	632.867	1466.91	865.199	1158.66	0.732922	1.4499	0.536111	1.83563	-0.448268	0.535949	-0.899397	0.876275	0.711		lipoprotein	1882	599	848	527	1163	710	1890
FORC35_1386	17312	76430	7051.84	43851.5	17504.8	3454.77	1.01114	0.0452017	0.407338	0.573747	0.0159804	-4.46748	-1.2957	-0.801512	0.989	E	phospho-2-dehydro-3-deoxyheptonate aldolase	27600	57289	9449	15754	23530	2117	1888
FORC35_1387	8144.8	46504.5	4503.95	20436.6	16512.4	1785.32	2.02736	0.0383902	0.552985	0.439454	1.0196	-4.70312	-0.854687	-1.18622	0.402	E	chorismate mutase	12985	34858	6035	7342	22196	1094	1886
FORC35_1388	6064.22	14946.1	4218.12	6819.61	6786.94	1901.18	1.11918	0.127203	0.695575	0.456282	0.162438	-2.9748	-0.523722	-1.132	0.893	E	P-protein	9668	11203	5652	2450	9123	1165	1884
FORC35_1389	15905.7	17709	18853.2	95661	25663.6	40835.4	1.61348	2.30591	1.18531	5.40183	0.690177	1.20534	0.245262	2.43345	0.568	J	translation inhibitor protein RaiA	25358	13274	25262	34367	34497	25023	1882
FORC35_1390	2530.94	2925.71	2270.26	1018.77	1896.3	1140.71	0.749245	0.389892	0.897003	0.348212	-0.41649	-1.35885	-0.156815	-1.52196	0.73	M	outer membrane biogenesis protein BamD	4035	2193	3042	366	2549	699	1880
FORC35_1391	1896.17	2131.91	2044.88	2070.93	1671.63	3606.53	0.881582	1.69169	1.07843	0.971398	-0.181834	0.758465	0.108929	-0.0418653	0.88	J	ribosomal large subunit pseudouridine synthase D	3023	1598	2740	744	2247	2210	1878
FORC35_1392	802.876	943.217	914.971	1355.57	872.638	1591.12	1.08689	1.6869	1.13962	1.43718	0.120206	0.754378	0.188549	0.523239	0.921	S	membrane protein	1280	707	1226	487	1173	975	1876
FORC35_1393	7307.42	43917.6	22000.3	129620	27998.8	104710	3.83156	2.38424	3.01068	2.95143	1.93793	1.25353	1.59009	1.56141	0.119	O	ATP-dependent chaperone protein ClpB	11650	32919	29479	46567	37636	64164	1874
FORC35_1394	15.6812	69.3738	32.8375	133.609	20.8302	96.283	1.32835	1.38789	2.09407	1.92592	0.409641	0.47289	1.06631	0.945551	0.797		hypothetical protein	25	52	44	48	28	59	1872
FORC35_1398	67.1154	38.6893	82.0936	97.423	30.5014	203.989	0.454462	5.2725	1.22317	2.51809	-1.13777	2.39849	0.290626	1.33233	0.377	R	acetyltransferase	107	29	110	35	41	125	5248
FORC35_1399	12097.7	2271.99	832.131	1497.53	1524.33	2403.81	0.126001	1.05802	0.0687842	0.659126	-2.98849	0.0813654	-3.86178	-0.601373	0.021	G	alpha-ketoglutarate transporter	19287	1703	1115	538	2049	1473	1860
FORC35_1400	185.038	45.3598	61.1971	100.207	55.0513	89.7554	0.297514	1.97874	0.330728	2.20915	-1.74897	0.984584	-1.59628	1.14349	0.166	R	lipoprotein	295	34	82	36	74	55	1858
FORC35_1401	5221.83	4674.73	5788.35	7365.18	3326.89	13528.6	0.637111	2.89398	1.10849	1.57553	-0.650383	1.53306	0.148596	0.655838	0.591	I	phosphatidylserine synthase	8325	3504	7756	2646	4472	8290	1856
FORC35_1402	2428.07	3751.52	3897.21	13466.6	3038.24	15472.2	1.2513	4.12424	1.60506	3.58965	0.323424	2.04413	0.68263	1.84384	0.789	C	protein lysine acetyltransferase	3871	2812	5222	4838	4084	9481	1854
FORC35_1403	92.8325	177.437	156.724	50.1033	156.227	55.4851	1.68289	0.312703	1.68825	0.282372	0.750939	-1.67713	0.755526	-1.82433	0.542	S	hypothetical protein	148	133	210	18	210	34	1852
FORC35_1404	957.806	305.512	348.525	757.116	572.831	2199.82	0.598066	7.20045	0.363878	2.47819	-0.741622	2.84809	-1.45847	1.30929	0.542	O	thioredoxin	1527	229	467	272	770	1348	1850
FORC35_1405	3292.42	2789.63	2341.16	3312.38	3588.75	3883.96	1.09	1.39229	0.711076	1.18739	0.124335	0.477455	-0.491923	0.247796	0.918	J	methyltransferase	5249	2091	3137	1190	4824	2380	1848
FORC35_1406	907.626	847.161	773.919	448.146	882.309	383.5	0.972107	0.452689	0.852685	0.528997	-0.0408136	-1.14341	-0.229915	-0.918668	0.974	L	uracil-DNA glycosylase	1447	635	1037	161	1186	235	1846
FORC35_1407	674.29	16525.6	33496.4	104836	57611.2	1687.4	85.4398	0.102108	49.6766	6.34381	6.41684	-3.29183	5.63449	2.66535	0	R	autonomous glycyl radical cofactor	1075	12387	44883	37663	77441	1034	1844
FORC35_1408	95.3415	161.428	200.756	80.7219	298.319	200.726	3.12895	1.24344	2.10565	0.50005	1.64568	0.314337	1.07427	-0.999855	0.187	E	cysteine/O-acetylserine exporter	152	121	269	29	401	123	1842
FORC35_1409	227.69	217.46	204.488	161.444	217.974	279.058	0.957324	1.28326	0.898095	0.742406	-0.0629213	0.359811	-0.15506	-0.42972	0.962	K	LysR family transcriptional regulator	363	163	274	58	293	171	1840
FORC35_1410	1849.12	2235.97	2145.63	1828.77	2404.4	2025.21	1.30029	0.905739	1.16035	0.817885	0.378838	-0.142833	0.214559	-0.290029	0.754	L	ATP-dependent RNA helicase SrmB	2948	1676	2875	657	3232	1241	1838
FORC35_1411	148.03	245.477	197.025	381.341	377.92	93.0192	2.55299	0.378933	1.33098	1.55347	1.35219	-1.39999	0.412485	0.635498	0.274	R	tRNA (adenine-N6)-methyltransferase	236	184	264	137	508	57	1836
FORC35_1412	920.798	4788.13	3485.99	6986.62	8262.91	2072.53	8.97364	0.432848	3.78584	1.45915	3.16569	-1.20807	1.92061	0.545133	0.015	H	L-aspartate oxidase	1468	3589	4671	2510	11107	1270	1834
FORC35_1413	6855.18	8446.26	6810.78	8038.79	4151.91	14328.2	0.605661	1.6964	0.993524	0.951757	-0.723419	0.762474	-0.00937318	-0.0713351	0.55	K	RNA polymerase sigma factor AlgU	10929	6331	9126	2888	5581	8780	1832
FORC35_1414	16507.3	16365.6	15026.1	15442.9	8741.26	29106.8	0.529541	1.77854	0.910274	0.943625	-0.917187	0.830696	-0.135628	-0.0837152	0.45	T	sigma-E factor negative regulatory protein	26317	12267	20134	5548	11750	17836	1830
FORC35_1415	5541.72	4697.41	4402.46	3173.21	3339.53	6632.1	0.602616	1.41186	0.79442	0.675523	-0.730689	0.497602	-0.332026	-0.565924	0.546	T	anti-sigma E factor	8835	3521	5899	1140	4489	4064	1828
FORC35_1416	845.529	522.972	700.781	350.723	506.621	626.656	0.599177	1.19826	0.828808	0.670634	-0.738947	0.260939	-0.27089	-0.576402	0.543	T	sigma-E factor regulatory protein rseC	1348	392	939	126	681	384	1826
FORC35_1417	4112.23	6570.5	4567.39	5647.75	4863.86	5182.96	1.18278	0.788823	1.11068	0.859561	0.242181	-0.342226	0.151449	-0.218327	0.841	M	elongation factor 4	6556	4925	6120	2029	6538	3176	1824
FORC35_1418	1531.74	3209.87	2087.42	3003.41	3611.81	2003.99	2.35799	0.624321	1.36278	0.935679	1.23756	-0.67964	0.446551	-0.0959142	0.311	U	signal peptidase	2442	2406	2797	1079	4855	1228	1822
FORC35_1419	2143.3	2178.61	2287.43	3014.55	2017.56	3387.86	0.941331	1.55506	1.06724	1.3837	-0.0872257	0.636968	0.0938905	0.468536	0.943	K	ribonuclease III	3417	1633	3065	1083	2712	2076	1820
FORC35_1420	3161.95	3722.17	3097.17	4183.62	3099.98	5816.15	0.980403	1.56257	0.979512	1.12397	-0.0285535	0.643919	-0.029865	0.168607	0.981	R	GTP-binding protein Era	5041	2790	4150	1503	4167	3564	1818
FORC35_1421	450.363	703.077	512.712	615.157	799.732	739.258	1.77575	1.05146	1.13844	0.874949	0.828428	0.0723945	0.18706	-0.192729	0.495	L	DNA repair protein RecO	718	527	687	221	1075	453	1816
FORC35_1422	3288.03	4817.48	3528.53	3365.27	4047.02	2221.04	1.23083	0.461037	1.07315	0.698554	0.299637	-1.11704	0.101846	-0.517557	0.804	H	pyridoxine 5'-phosphate synthase	5242	3611	4728	1209	5440	1361	1814
FORC35_1423	812.912	1184.69	786.606	411.96	868.174	290.481	1.06798	0.245195	0.96764	0.347736	0.0948861	-2.028	-0.0474573	-1.52394	0.938	I	4'-phosphopantetheinyl transferase	1296	888	1054	148	1167	178	1812
FORC35_1425	163.711	30.6846	57.4655	16.7011	39.4287	35.9021	0.240843	1.17004	0.351017	0.544283	-2.05384	0.226553	-1.51039	-0.877572	0.108	C	ferredoxin	261	23	77	6	53	22	1810
FORC35_1426	1032.45	240.14	262.7	222.681	324.356	584.226	0.314163	2.43285	0.254443	0.927297	-1.67042	1.28265	-1.97458	-0.108897	0.177	K	transcriptional regulator	1646	180	352	80	436	358	1808
FORC35_1427	1547.42	1616.94	1670.98	1458.56	1160.54	2240.62	0.749986	1.38571	1.07985	0.902048	-0.415064	0.470628	0.11083	-0.148723	0.731	E	hypothetical protein	2467	1212	2239	524	1560	1373	1806
FORC35_1428	567.031	461.603	514.951	473.197	355.602	582.594	0.627129	1.26211	0.908153	1.02512	-0.673165	0.335839	-0.138993	0.0357902	0.58	F	adenosine deaminase	904	346	690	170	478	357	1804
FORC35_1429	287.906	344.201	326.882	203.197	209.79	329.647	0.728676	0.957717	1.13538	0.590343	-0.456652	-0.0623294	0.183171	-0.760375	0.709	M	membrane protein	459	258	438	73	282	202	1802
FORC35_1430	1729.95	20231.8	8163.84	15554.3	2937.06	1078.7	1.69778	0.0533168	4.71913	0.768803	0.763647	-4.22926	2.23852	-0.379314	0.528	F	phosphoribosylformylglycinamidine synthase	2758	15165	10939	5588	3948	661	1800
FORC35_1431	876.264	897.857	931.389	821.137	737.985	1457.3	0.842196	1.62309	1.06291	0.914551	-0.247773	0.69874	0.0880195	-0.128864	0.838	T	sensory histidine kinase	1397	673	1248	295	992	893	1798
FORC35_1432	546.959	498.958	594.806	470.414	424.788	721.307	0.776636	1.44563	1.08748	0.942793	-0.36469	0.531694	0.120985	-0.0849877	0.764		membrane protein	872	374	797	169	571	442	1796
FORC35_1433	772.768	1029.93	761.232	1208.05	938.104	1152.13	1.21395	1.11865	0.985072	1.17293	0.279713	0.161754	-0.0216995	0.230122	0.817	T	response regulator	1232	772	1020	434	1261	706	1794
FORC35_1434	763.359	1296.76	1241.85	779.384	1320.49	647.87	1.72984	0.499608	1.62683	0.601025	0.790637	-1.00113	0.70206	-0.734502	0.515	E	nitrogen regulatory protein P-II	1217	972	1664	280	1775	397	1792
FORC35_1435	970.351	1240.72	1165.73	1194.13	1888.11	473.255	1.9458	0.381435	1.20135	0.962444	0.960366	-1.39049	0.264655	-0.0552254	0.43	C	nitric oxide dioxygenase/dihydropteridine reductase 2	1547	930	1562	429	2538	290	1790
FORC35_1436	0	0	2.9852	0	0	0	-	-	-	-	-	-	-	-	1		hypothetical protein	0	0	4	0	0	0	1788
FORC35_1437	28063.6	73693.7	66445.8	31178.1	36701.4	4597.11	1.30779	0.0623813	2.36768	0.423078	0.387132	-4.00274	1.24348	-1.24101	0.748	E	serine hydroxymethyltransferase	44741	55238	89033	11201	49334	2817	1786
FORC35_1438	533.16	345.535	438.828	339.589	382.384	620.128	0.717203	1.79469	0.82307	0.982791	-0.479547	0.843734	-0.280913	-0.0250434	0.693	G	hypothetical protein	850	259	588	122	514	380	1784
FORC35_1439	269.716	184.107	226.877	306.187	206.071	667.453	0.764027	3.62535	0.841169	1.66309	-0.388304	1.85812	-0.249532	0.733863	0.752	G	hypothetical protein	430	138	304	110	277	409	1782
FORC35_1440	175.002	18.6776	19.404	13.9176	11.903	88.1234	0.0680164	4.71813	0.110879	0.745149	-3.87797	2.23822	-3.17294	-0.424399	0.006	G	sugar ABC transporter substrate-binding protein	279	14	26	5	16	54	1780
FORC35_1441	172.493	72.0421	50.7488	52.8868	49.8438	89.7554	0.288962	1.24587	0.294208	0.73411	-1.79105	0.317159	-1.76509	-0.445933	0.155	P	heme ABC transporter ATP-binding protein	275	54	68	19	67	55	1778
FORC35_1442	90.3235	28.0164	35.0764	25.0516	30.5014	55.4851	0.337691	1.98045	0.388342	0.894176	-1.56623	0.985829	-1.3646	-0.161369	0.222	G	sugar ABC transporter permease	144	21	47	9	41	34	1776
FORC35_1443	303.587	154.757	152.993	167.011	130.933	280.69	0.431286	1.81374	0.503949	1.07918	-1.21328	0.85897	-0.988649	0.109938	0.326	C	alcohol dehydrogenase	484	116	205	60	176	172	1774
FORC35_1444	288.534	181.439	202.995	194.846	133.165	347.598	0.461522	1.91578	0.703541	1.07389	-1.11553	0.937933	-0.507294	0.102847	0.365	G	hypothetical protein	460	136	272	70	179	213	1772
FORC35_1445	2628.16	1877.1	3298.67	5667.24	1909.69	4814.15	0.726624	2.56468	1.25512	3.01915	-0.46072	1.35878	0.32783	1.59414	0.703	S	membrane protein	4190	1407	4420	2036	2567	2950	1770
FORC35_1446	145.521	192.112	150.754	158.66	160.69	148.504	1.10424	0.773008	1.03596	0.825873	0.143054	-0.371444	0.0509641	-0.276008	0.911	C	phenylpropionate dioxygenase ferredoxin reductase subunit	232	144	202	57	216	91	1768
FORC35_1447	35.1258	24.014	40.3005	11.1341	31.2454	35.9021	0.889528	1.49505	1.14732	0.46365	-0.168887	0.580193	0.198267	-1.10889	0.924	I	2,3-dihydroxy-2,3-dihydrophenylpropionate dehydrogenase	56	18	54	4	42	22	1766
FORC35_1448	6.8997	10.6729	3.7315	2.7835	4.4636	6.5277	0.646927	0.611614	0.540821	0.260801	-0.628326	-0.709306	-0.886778	-1.93898	0.809	C	3-phenylpropionate dioxygenase	11	8	5	1	6	4	1764
FORC35_1449	15.6812	21.3458	23.8818	27.8351	22.3181	32.6383	1.42324	1.52903	1.52296	1.30401	0.509178	0.612614	0.606876	0.382953	0.713	Q	3-phenylpropionate dioxygenase	25	16	32	10	30	20	1762
FORC35_1450	13.7994	14.6752	20.8966	16.7011	11.1591	22.8468	0.808666	1.55683	1.51431	1.13805	-0.306385	0.638612	0.598663	0.186563	0.854		3-phenylpropionate dioxygenase	22	11	28	6	15	14	1760
FORC35_1453	108.514	53.3645	73.138	58.4538	63.9786	97.9149	0.58959	1.83483	0.673998	1.09537	-0.762216	0.875648	-0.569184	0.131416	0.543	P	3-phenylpropionate dioxygenase	173	40	98	21	86	60	1758
FORC35_1454	381.993	288.168	173.889	1631.14	354.858	1741.25	0.928964	6.04249	0.455215	5.66037	-0.106306	2.59514	-1.13538	2.5009	0.931	K	LysR family transcriptional regulator	609	216	233	586	477	1067	1756
FORC35_1455	220.791	277.495	318.673	528.868	277.488	799.639	1.25679	2.88163	1.44332	1.90586	0.329748	1.52688	0.529394	0.930444	0.788	G	3-phenylpropionic acid MFS transporter	352	208	427	190	373	490	1754
FORC35_1456	2453.79	2855	4145.73	12344.9	2199.82	19517.7	0.8965	6.83633	1.68952	4.32395	-0.157625	2.77322	0.756614	2.11235	0.896	K	stationary phase inducible protein CsiE	3912	2140	5555	4435	2957	11960	1752
FORC35_1457	87.8145	64.0374	83.5862	41.7527	66.2104	86.4915	0.75398	1.35064	0.95185	0.652005	-0.407401	0.433644	-0.0711944	-0.617045	0.744	R	hypothetical protein	140	48	112	15	89	53	1750
FORC35_1458	401.438	528.308	676.899	186.495	786.341	362.285	1.95881	0.685746	1.68619	0.353005	0.969979	-0.544254	0.753764	-1.50224	0.427	G	inositol monophosphatase	640	396	907	67	1057	222	1748
FORC35_1459	717.57	1407.49	990.347	378.558	1307.84	349.23	1.8226	0.248123	1.38014	0.26896	0.865995	-2.01087	0.464815	-1.89454	0.476	J	tRNA methyltransferase	1144	1055	1327	136	1758	214	1746
FORC35_1460	4923.89	4143.75	2079.95	506.6	1349.5	4223.4	0.274072	1.01922	0.422421	0.122256	-1.86737	0.0274662	-1.24325	-3.03202	0.133	K	transcriptional regulator	7850	3106	2787	182	1814	2588	1744
FORC35_1461	19192.5	11748.2	6795.11	2819.7	6217.82	21479.3	0.323972	1.8283	0.354051	0.240011	-1.62606	0.870506	-1.49797	-2.05883	0.187	E	cysteine desulfurase	30598	8806	9105	1013	8358	13162	1742
FORC35_1462	6860.2	7284.25	3788.99	1940.11	3800.77	8347.25	0.554033	1.14593	0.552316	0.266343	-0.851957	0.19652	-0.856435	-1.90864	0.482	C	FeS cluster assembly scaffold IscU	10937	5460	5077	697	5109	5115	1740
FORC35_1463	4105.33	4892.19	2879.25	1361.14	2527.9	4664.01	0.61576	0.953359	0.701344	0.278227	-0.69956	-0.0689079	-0.511806	-1.84567	0.563	S	iron-sulfur cluster assembly protein	6545	3667	3858	489	3398	2858	1738
FORC35_1464	25.7171	36.021	17.165	2.7835	20.0863	11.4234	0.781048	0.317132	0.667455	0.0772744	-0.356516	-1.65685	-0.583258	-3.69387	0.784		hypothetical protein	41	27	23	1	27	7	1736
FORC35_1465	1117.13	1123.32	804.517	111.341	625.651	928.56	0.560054	0.826619	0.720167	0.0991172	-0.836363	-0.274705	-0.473597	-3.33472	0.491	O	co-chaperone HscB	1781	842	1078	40	841	569	1734
FORC35_1466	4610.89	4115.74	4093.49	1987.43	2994.35	5290.67	0.649407	1.28547	0.887787	0.482886	-0.622804	0.3623	-0.171715	-1.05025	0.606	O	chaperone protein HscA	7351	3085	5485	714	4025	3242	1732
FORC35_1467	1030.57	1136.66	1144.83	565.053	951.495	861.651	0.923274	0.758053	1.11088	0.497116	-0.115169	-0.399629	0.1517	-1.00835	0.925	C	2Fe-2S ferredoxin	1643	852	1534	203	1279	528	1730
FORC35_1468	344.986	405.57	408.976	155.877	306.502	313.328	0.888448	0.772561	1.18549	0.38434	-0.17064	-0.372279	0.245478	-1.37955	0.89	S	hypothetical protein	550	304	548	56	412	192	1728
FORC35_1469	905.117	1035.27	1912.03	1052.17	1403.06	1501.36	1.55015	1.45021	2.11247	1.01632	0.632406	0.536264	1.07893	0.0233572	0.601	E	aminopeptidase B	1443	776	2562	378	1886	920	1726
FORC35_1470	811.03	811.14	1256.03	359.073	627.139	758.841	0.773262	0.935523	1.54869	0.442677	-0.37097	-0.0961542	0.631047	-1.17567	0.759		enhanced serine sensitivity protein SseB	1293	608	1683	129	843	465	1724
FORC35_1472	3049.05	3116.49	4745.01	8843.23	2687.84	9863.3	0.881536	3.16488	1.55623	2.83756	-0.181909	1.66215	0.638054	1.50465	0.88	P	rhodanese-like protein	4861	2336	6358	3177	3613	6044	1722
FORC35_1473	10507	12275.2	11086.4	18415.7	11592.8	10155.4	1.10334	0.827313	1.05514	1.50024	0.141873	-0.273494	0.077435	0.585196	0.906	R	hypothetical protein	16751	9201	14855	6616	15583	6223	1720
FORC35_1474	641.046	736.43	588.835	837.838	597.381	463.464	0.931885	0.629339	0.918553	1.1377	-0.101776	-0.668091	-0.122564	0.186123	0.935	M	penicillin-binding protein 1C	1022	552	789	301	803	284	1718
FORC35_1475	282.261	541.649	313.448	239.382	539.354	363.917	1.91084	0.671868	1.11049	0.44195	0.934203	-0.573749	0.151198	-1.17804	0.443	F	Nucleoside diphosphate kinase	450	406	420	86	725	223	1716
FORC35_1476	1182.99	2971.07	2747.9	2057.02	2115.01	2602.91	1.78786	0.876084	2.32285	0.692349	0.838232	-0.190859	1.21589	-0.530428	0.49	J	50S rRNA methyltransferase	1886	2227	3682	739	2843	1595	1714
FORC35_1477	4907.58	4800.14	6284.64	5091.05	5151.02	7182.06	1.04961	1.49622	1.2806	1.0606	0.0698467	0.581323	0.356819	0.0848874	0.954	S	cytoskeleton protein rodZ	7824	3598	8421	1829	6924	4401	1712
FORC35_1478	6274.98	6814.64	7671.28	9656.01	6384.47	9494.48	1.01745	1.39325	1.22252	1.41695	0.0249562	0.478451	0.289857	0.502789	0.984	I	4-hydroxy-3-methylbut-2-en-1-yl diphosphate synthase	10004	5108	10279	3469	8582	5818	1710
FORC35_1479	4289.74	6212.96	4456.94	3966.51	4468.83	3196.92	1.04175	0.514557	1.03898	0.638425	0.0590066	-0.958597	0.0551624	-0.647411	0.961	J	histidyl-tRNA synthetase	6839	4657	5972	1425	6007	1959	1708
FORC35_1480	1559.96	2841.66	1617.24	2315.88	2511.53	1316.96	1.60999	0.463446	1.03672	0.814976	0.687056	-1.10953	0.0520263	-0.29517	0.57	S	membrane protein	2487	2130	2167	832	3376	807	1706
FORC35_1481	4296.64	7294.93	6925.72	9569.72	6947.63	11855.9	1.61699	1.62522	1.61189	1.31183	0.693311	0.700636	0.688754	0.391584	0.566	S	outer membrane assembly lipoprotein YfgL	6850	5468	9280	3438	9339	7265	1704
FORC35_1482	4802.2	6303.68	6644.36	10154.3	4687.55	12201.8	0.976125	1.93567	1.38361	1.61085	-0.0348627	0.952832	0.468434	0.687819	0.977	R	GTP-binding protein Der	7656	4725	8903	3648	6301	7477	1702
FORC35_1483	114.786	201.451	178.367	306.187	209.79	236.628	1.82766	1.17462	1.55391	1.51991	0.869999	0.232191	0.635901	0.603983	0.479	L	hypothetical protein	183	151	239	110	282	145	1700
FORC35_1484	1349.21	1259.4	1283.65	464.847	1064.57	856.756	0.789036	0.680288	0.951407	0.369101	-0.341837	-0.555783	-0.0718653	-1.43791	0.777	L	exodeoxyribonuclease VII large subunit	2151	944	1720	167	1431	525	1698
FORC35_1485	0	0	0	0	0	0	-	-	-	-	-	-	-	-	1		hypothetical protein	0	0	0	0	0	0	1696
FORC35_1486	836.12	6526.48	2590.43	3103.62	3517.33	866.547	4.20673	0.132774	3.09815	0.475543	2.0727	-2.91295	1.63141	-1.07235	0.097	F	inosine 5'-monophosphate dehydrogenase	1333	4892	3471	1115	4728	531	1694
FORC35_1487	1147.23	8151.43	4106.92	4929.6	5165.15	985.677	4.50227	0.120921	3.57984	0.604754	2.17065	-3.04787	1.8399	-0.725581	0.084	F	GMP synthase	1829	6110	5503	1771	6943	604	1692
FORC35_1488	166.22	160.094	144.037	161.444	191.192	249.683	1.15023	1.55961	0.866542	1.00843	0.201923	0.641183	-0.206658	0.0121173	0.87		hypothetical protein	265	120	193	58	257	153	1690
FORC35_1489	87.8145	42.6916	42.5394	22.2681	37.9408	19.583	0.432056	0.458709	0.484423	0.521604	-1.21071	-1.12435	-1.04566	-0.938974	0.34	M	membrane protein	140	32	57	8	51	12	1688
FORC35_1490	521.242	150.755	226.877	97.423	240.292	125.657	0.460998	0.833523	0.435262	0.646235	-1.11717	-0.262706	-1.20004	-0.629869	0.362		hypothetical protein	831	113	304	35	323	77	1686
FORC35_1491	0	0	0.7463	0	0.7439	0	-	-	-	-	-	-	-	-	1		hypothetical protein	0	0	1	0	1	0	1684
FORC35_1492	436.564	192.112	279.118	208.764	289.391	218.677	0.662885	1.13828	0.639353	1.08668	-0.59317	0.18685	-0.645315	0.119921	0.627	T	cyclic di-GMP phosphodiesterase	696	144	374	75	389	134	1682
FORC35_1493	3300.57	4243.81	3039.7	3465.48	3502.45	3787.68	1.06117	0.892518	0.920962	0.816595	0.0856504	-0.164047	-0.118786	-0.292307	0.943	F	exopolyphosphatase	5262	3181	4073	1245	4708	2321	1680
FORC35_1494	5098.89	6260.99	5172.64	7195.38	5674.01	6522.77	1.11279	1.04181	1.01447	1.14924	0.154185	0.0590936	0.0207193	0.200681	0.898	P	polyphosphate kinase	8129	4693	6931	2585	7627	3997	1678
FORC35_1495	288.534	1298.09	846.311	578.971	382.384	217.045	1.32527	0.167203	2.93314	0.446017	0.406281	-2.58033	1.55245	-1.16483	0.738	F	phosphoribosylglycinamide formyltransferase	460	973	1134	208	514	133	1676
FORC35_1496	302.96	1583.59	1535.15	938.044	264.098	310.064	0.871724	0.195798	5.06717	0.592353	-0.198057	-2.35256	2.34118	-0.755472	0.872	F	phosphoribosylaminoimidazole synthetase	483	1187	2057	337	355	190	1674
FORC35_1497	0.6273	2.6682	2.2389	0	2.2318	1.6319	3.55779	0.611611	3.56911	0	1.83098	-0.709314	1.83556	-	0.712		hypothetical protein	1	2	3	0	3	1	1672
FORC35_1498	326.796	1983.82	2161.3	1491.96	2955.66	138.713	9.04438	0.0699219	6.61362	0.752064	3.17702	-3.83811	2.72544	-0.411072	0.015	F	Uracil phosphoribosyltransferase	521	1487	2896	536	3973	85	1670
FORC35_1499	114.786	341.533	204.488	228.248	314.685	109.338	2.74149	0.32014	1.78147	0.668306	1.45496	-1.64322	0.833066	-0.58142	0.24	F	Uracil transporter	183	256	274	82	423	67	1668
FORC35_1501	1504.14	2414.74	1519.48	2151.66	1992.26	1263.1	1.32452	0.52308	1.0102	0.89105	0.405472	-0.934898	0.0146395	-0.166422	0.737	P	arsenate reductase	2398	1810	2036	773	2678	774	1664
FORC35_1502	3479.96	4297.18	2943.43	3529.5	2481.03	4704.81	0.712947	1.09486	0.845822	0.821353	-0.488134	0.130749	-0.241575	-0.283926	0.686	O	hypothetical protein	5548	3221	3944	1268	3335	2883	1662
FORC35_1503	995.44	1194.03	1001.54	612.373	905.371	611.968	0.909518	0.512523	1.00613	0.512862	-0.136826	-0.964311	0.00881622	-0.963357	0.91	S	permase	1587	895	1342	220	1217	375	1660
FORC35_1504	158.066	193.446	183.591	133.609	177.057	122.394	1.12014	0.632701	1.16148	0.690676	0.163685	-0.660404	0.215968	-0.533919	0.895	P	formate transporter	252	145	246	48	238	75	1658
FORC35_1505	186.919	277.495	272.401	381.341	241.78	292.113	1.2935	1.05268	1.45732	1.37423	0.371275	0.0740627	0.543318	0.45862	0.763	K	hydrogenase	298	208	365	137	325	179	1656
FORC35_1506	11.2904	18.6776	26.867	19.4846	14.8787	14.6872	1.31782	0.786354	2.37963	1.04321	0.398152	-0.34675	1.25074	0.0610252	0.819		formate hydrogenlyase maturation protein HycH	18	14	36	7	20	9	1654
FORC35_1507	6.2725	10.6729	5.2241	2.7835	8.9272	6.5277	1.42323	0.611614	0.832858	0.260801	0.509167	-0.709306	-0.263858	-1.93898	0.772		formate hydrogenlyase subunit 7	10	8	7	1	12	4	1652
FORC35_1508	57.7067	73.3762	80.601	80.7219	56.5392	120.762	0.979768	1.64579	1.39674	1.10011	-0.0294874	0.71878	0.482059	0.137648	1	C	hydrogenase-4 component I	92	55	108	29	76	74	1650
FORC35_1509	58.9612	76.0444	79.1084	105.774	58.0271	89.7554	0.984157	1.1803	1.3417	1.39095	-0.0230391	0.239157	0.424065	0.476066	1	C	(4Fe-4S)-binding protein	94	57	106	38	78	55	1648
FORC35_1510	177.511	226.799	197.771	353.506	178.545	303.536	1.00583	1.33835	1.11414	1.55868	0.00838012	0.420454	0.155924	0.640321	1	C	hydrogenase 3 large subunit	283	170	265	127	240	186	1646
FORC35_1511	87.1873	90.7196	152.246	64.0208	97.4557	130.553	1.11777	1.43908	1.7462	0.7057	0.160629	0.525152	0.804217	-0.502874	0.902	C	hydrogenase	139	68	204	23	131	80	1644
FORC35_1512	17.5629	29.3505	34.3301	19.4846	30.5014	35.9021	1.73669	1.22322	1.95469	0.663859	0.796344	0.290683	0.966943	-0.591051	0.554	C	hydrogenase-4 subunit E	28	22	46	7	41	22	1642
FORC35_1516	1.2545	5.3365	8.9557	8.3505	2.9758	6.5277	2.3721	1.22322	7.13886	1.56479	1.24617	0.290681	2.83569	0.645969	0.781	C	hydantoin racemase	2	4	12	3	4	4	1636
FORC35_1517	16.9357	13.3411	35.8227	13.9176	34.2211	17.9511	2.02065	1.34555	2.11522	1.04321	1.01482	0.428195	1.08081	0.0610328	0.45	C	hydrogenase 3 membrane subunit	27	10	48	5	46	11	1634
FORC35_1518	61.4702	53.3645	52.9877	33.4022	40.9165	47.3256	0.665631	0.886837	0.862006	0.625925	-0.587204	-0.17326	-0.21423	-0.675937	0.647	C	hydantoin racemase	98	40	71	12	55	29	1632
FORC35_1519	20.6991	30.6846	29.8522	16.7011	27.5257	21.2149	1.3298	0.691386	1.4422	0.544283	0.411211	-0.532437	0.528269	-0.877572	0.767	C	NADH-Ubiquinone/plastoquinone (complex I), various chains family protein	33	23	40	6	37	13	1630
FORC35_1520	17.5629	20.0117	37.3153	25.0516	17.8545	35.9021	1.0166	1.79406	2.12467	1.25185	0.0237566	0.843225	1.08724	0.324059	1	C	hydrogenase-4 F-S subunit	28	15	50	9	24	22	1628
FORC35_1521	7483.05	7548.41	6352.55	2828.05	4779.79	3397.65	0.638749	0.450115	0.848925	0.374655	-0.646678	-1.15164	-0.23629	-1.41636	0.593	O	thioredoxin-dependent thiol peroxidase	11930	5658	8512	1016	6425	2082	1626
FORC35_1522	3956.04	3736.85	3877.8	1898.36	3165.45	3193.66	0.800156	0.85464	0.980222	0.50801	-0.321647	-0.226612	-0.0288188	-0.977071	0.79	E	glycine cleavage system regulatory protein	6307	2801	5196	682	4255	1957	1624
FORC35_1523	8390.68	12507.3	10840.8	5633.83	10506.6	4161.38	1.25218	0.332716	1.29201	0.450444	0.324439	-1.58763	0.369617	-1.15058	0.788	E	dihydrodipicolinate synthase	13377	9375	14526	2024	14123	2550	1622
FORC35_1524	7569.61	10882.4	8096.67	5823.11	8634.88	3038.63	1.14073	0.279225	1.06963	0.535097	0.189956	-1.8405	0.0971091	-0.902128	0.875	M	lipoprotein	12068	8157	10849	2092	11607	1862	1620
FORC35_1525	511.206	6055.54	4363.65	9669.93	1085.4	212.149	2.12322	0.0350339	8.53599	1.59687	1.08626	-4.8351	3.09356	0.675251	0.373	F	phosphoribosylaminoimidazole-succinocarboxamide synthase	815	4539	5847	3474	1459	130	1618
FORC35_1526	848.038	720.421	723.916	929.694	682.934	930.192	0.805311	1.29118	0.853637	1.29049	-0.312382	0.368689	-0.228305	0.367916	0.797	S	hypothetical protein	1352	540	970	334	918	570	1616
FORC35_1528	3426.02	2959.06	3970.35	6460.54	4168.28	6530.93	1.21665	2.20709	1.15888	2.18331	0.282917	1.14215	0.212731	1.12651	0.815	R	hypothetical protein	5462	2218	5320	2321	5603	4002	1614
FORC35_1529	2110.06	2181.27	2261.31	3404.24	2348.61	2186.77	1.11305	1.00252	1.07168	1.56067	0.154524	0.00362877	0.0998738	0.642161	0.898	R	methionine tRNA cytidine acetyltransferase	3364	1635	3030	1223	3157	1340	1612
FORC35_1530	788.449	936.547	1403.05	1792.58	1466.3	1705.35	1.85973	1.82089	1.77951	1.91404	0.89509	0.864647	0.831482	0.936617	0.461	R	hydrolase	1257	702	1880	644	1971	1045	1610
FORC35_1531	374.466	314.851	496.293	996.498	439.667	886.13	1.17412	2.81445	1.32533	3.16499	0.231574	1.49285	0.406357	1.6622	0.849		membrane protein	597	236	665	358	591	543	1608
FORC35_1532	3064.1	1316.77	1617.99	1809.28	2042.11	1731.46	0.666462	1.31493	0.528048	1.37403	-0.585405	0.394989	-0.92126	0.458417	0.628	E	succinyl-diaminopimelate desuccinylase	4885	987	2168	650	2745	1061	1606
FORC35_1533	1142.22	382.89	605.254	386.909	712.692	435.721	0.623955	1.13798	0.529894	1.01049	-0.680486	0.186476	-0.916224	0.0150617	0.575	P	reductase	1821	287	811	139	958	267	1604
FORC35_1534	541.314	525.64	461.963	514.95	428.508	447.145	0.791606	0.850667	0.853411	0.979663	-0.337145	-0.233333	-0.228688	-0.0296427	0.781	P	multidrug transporter	863	394	619	185	576	274	1602
FORC35_1535	814.793	667.056	679.884	837.838	687.398	1006.89	0.843647	1.50946	0.834426	1.25602	-0.245289	0.594029	-0.261145	0.328863	0.84	T	nitrate/nitrite sensor protein NarQ	1299	500	911	301	924	617	1600
FORC35_1536	392.656	257.484	473.158	737.631	417.349	732.73	1.06289	2.84573	1.20502	2.86477	0.0879855	1.5088	0.269054	1.51842	0.944	E	oxidoreductase Fe-S binding subunit	626	193	634	265	561	449	1598
FORC35_1537	257.798	242.808	341.808	125.258	249.219	109.338	0.96672	0.450307	1.32587	0.515873	-0.0488298	-1.15102	0.406943	-0.954913	0.972	L	GDP-mannose pyrophosphatase NudK	411	182	458	45	335	67	1596
FORC35_1538	555.113	382.89	343.301	439.795	161.434	362.285	0.290813	0.946186	0.618433	1.14862	-1.78184	-0.0798045	-0.69331	0.199901	0.152		hypothetical protein	885	287	460	158	217	222	1594
FORC35_1539	8.1542	9.3388	6.7168	19.4846	9.6712	14.6872	1.18604	1.57271	0.823723	2.08641	0.246152	0.65325	-0.279769	1.06103	0.934		hypothetical protein	13	7	9	7	13	9	6714
FORC35_1540	23983.4	28377.9	34253.9	79458.2	15806.4	37589.5	0.659057	1.32461	1.42823	2.8	-0.601525	0.405564	0.514233	1.48543	0.618	G	transketolase	38236	21271	45898	28546	21247	23034	1592
FORC35_1541	13983.8	19072.5	20244.3	36817.5	9379.56	19943.6	0.670743	1.04568	1.44769	1.9304	-0.576169	0.0644372	0.533754	0.948902	0.633	G	transaldolase	22294	14296	27126	13227	12608	12221	1590
FORC35_1542	4911.97	7284.25	2788.2	6992.19	5069.93	3916.6	1.03216	0.53768	0.567633	0.959905	0.0456644	-0.89518	-0.816968	-0.0590369	0.97	C	malic enzyme	7831	5460	3736	2512	6815	2400	1588
FORC35_1543	10.036	8.0047	5.2241	30.6187	8.1833	26.1107	0.815395	3.26192	0.520536	3.82509	-0.29443	1.70572	-0.94193	1.93549	0.873	E	carboxysome shell protein	16	6	7	11	11	16	1586
FORC35_1544	22.5809	20.0117	17.165	25.0516	21.5742	97.9149	0.955418	4.89288	0.760156	1.25185	-0.0657959	2.29068	-0.395633	0.324059	1	E	ethanolamine utilization protein EutP	36	15	23	9	29	60	1584
FORC35_1545	53.316	20.0117	30.5985	38.9692	37.1968	146.872	0.697667	7.33933	0.573908	1.94732	-0.51939	2.87565	-0.801108	0.961491	0.681	E	ethanolamine utilization protein EutQ	85	15	41	14	50	90	1582
FORC35_1546	63.3519	60.0351	53.734	83.5054	58.771	159.928	0.927691	2.6639	0.848183	1.39094	-0.108283	1.41354	-0.237553	0.476063	0.937	E	ethanolamine utilization cobalamin adenosyltransferase	101	45	72	30	79	98	1580
FORC35_1547	60.8429	50.6963	47.0173	86.289	48.3559	236.628	0.794767	4.66756	0.772766	1.70208	-0.331397	2.22267	-0.371897	0.767296	0.802	C	phosphotransacetylase	97	38	63	31	65	145	1578
FORC35_1549	3.1362	1.3341	4.4778	0	1.4879	6.5277	0.474428	4.89296	1.42778	0	-1.07574	2.29071	0.513773	-	0.617	E	hypothetical protein	5	1	6	0	2	4	1574
FORC35_1550	47.0435	72.0421	68.6601	69.5879	49.8438	161.56	1.05953	2.24257	1.4595	0.965934	0.0834187	1.16515	0.545477	-0.0500038	0.96	C	aldehyde dehydrogenase	75	54	92	25	67	99	1572
FORC35_1551	18.1902	20.0117	35.0764	47.3197	20.8302	45.6936	1.14513	2.28334	1.92831	2.3646	0.195515	1.19115	0.947339	1.2416	0.936	E	ethanolamine utilization EutJ family protein	29	15	47	17	28	28	1570
FORC35_1552	60.8429	62.7033	62.6897	94.6395	46.1241	124.026	0.758085	1.97798	1.03035	1.50932	-0.399568	0.984025	0.0431395	0.593901	0.764	C	ethanol dehydrogenase	97	47	84	34	62	76	1568
FORC35_1553	215.773	264.154	321.658	339.589	165.154	721.307	0.765407	2.73063	1.49072	1.28557	-0.385702	1.44923	0.576013	0.362409	0.754	E	ethanolamine utilization protein eutH	344	198	431	122	222	442	1566
FORC35_1554	205.11	221.463	319.419	423.094	139.116	626.656	0.678253	2.82962	1.55731	1.91045	-0.560105	1.50061	0.639054	0.933916	0.65	E	ethanolamine utilization protein EutA	327	166	428	152	187	384	1564
FORC35_1555	617.838	683.065	851.535	1672.89	553.489	1724.93	0.895848	2.52528	1.37825	2.4491	-0.158674	1.33645	0.462837	1.29225	0.897	E	ethanolamine ammonia lyase large subunit	985	512	1141	601	744	1057	1562
FORC35_1556	466.671	440.257	573.909	960.312	332.54	1245.15	0.712578	2.82824	1.22979	2.18125	-0.48888	1.4999	0.298415	1.12516	0.688	E	ethanolamine ammonia-lyase small subunit	744	330	769	345	447	763	1560
FORC35_1557	573.931	442.925	674.66	854.539	328.076	1326.75	0.57163	2.99542	1.17551	1.92931	-0.806846	1.58276	0.233285	0.948083	0.507	E	ethanolamine utilization protein EutL	915	332	904	307	441	813	1558
FORC35_1558	353.767	297.507	464.948	559.486	238.804	868.179	0.675031	2.91818	1.31428	1.88058	-0.566975	1.54507	0.394271	0.911179	0.643	E	carboxysome shell protein	564	223	623	201	321	532	1556
FORC35_1559	437.191	476.278	517.19	748.765	366.017	1395.29	0.837202	2.92957	1.18298	1.57212	-0.256353	1.55069	0.24243	0.65271	0.834	K	bacterial regulatory helix-turn-helix s, AraC family protein	697	357	693	269	492	855	1554
FORC35_1560	931.461	771.117	683.616	723.714	775.182	855.124	0.832222	1.10894	0.733918	0.938527	-0.26496	0.149184	-0.44631	-0.0915303	0.827	H	coproporphyrinogen III oxidase	1485	578	916	260	1042	524	1552
FORC35_1561	1370.53	651.047	770.934	317.321	739.473	496.102	0.539551	0.762007	0.562506	0.487401	-0.890168	-0.392123	-0.830059	-1.03682	0.464	M	N-acetylmuramoyl-L-alanine amidase	2185	488	1033	114	994	304	1550
FORC35_1562	88.4418	96.0561	177.621	55.6703	92.9921	117.498	1.05145	1.22322	2.00833	0.57956	0.0723798	0.290686	1.006	-0.786969	0.957	R	acetyltransferase	141	72	238	20	125	72	1548
FORC35_1563	56.4522	50.6963	82.8399	38.9692	58.0271	44.0617	1.0279	0.86913	1.46743	0.768679	0.039697	-0.202355	0.553296	-0.379546	0.989		membrane protein	90	38	111	14	78	27	1546
FORC35_1564	910.135	841.825	652.271	434.228	561.672	518.949	0.617131	0.616457	0.716675	0.515818	-0.696352	-0.697927	-0.480609	-0.955067	0.566		RpoE-regulated lipoprotein	1451	631	874	156	755	318	1544
FORC35_1565	1449.57	3183.19	3158.37	2839.18	5158.46	848.596	3.55862	0.266587	2.17883	0.89193	1.83132	-1.90732	1.12356	-0.164997	0.14	P	deferrochelatase/peroxidase YfeX	2311	2386	4232	1020	6934	520	1542
FORC35_1566	213.264	341.533	257.475	526.084	377.176	535.268	1.76859	1.56725	1.20731	1.54036	0.822598	0.648238	0.271795	0.62327	0.5	V	esterase	340	256	345	189	507	328	1540
FORC35_1567	208.246	262.82	229.116	784.951	334.772	443.881	1.60758	1.68892	1.10022	2.98665	0.684889	0.756097	0.137789	1.57853	0.575	G	PTS system N-acetylmuramic acid-specific EIIBC component	332	197	307	282	450	272	1538
FORC35_1568	307.978	257.484	228.369	1127.32	348.163	538.532	1.13048	2.09152	0.741512	4.37823	0.176933	1.06455	-0.431458	2.13035	0.885	R	N-acetylmuramic acid-6-phosphate etherase	491	193	306	405	468	330	1536
FORC35_1569	70.8789	82.715	91.0493	169.794	113.078	88.1234	1.59537	1.06539	1.28458	2.05276	0.673895	0.0913762	0.361292	1.03757	0.587	K	RpiR family transcriptional regulator	113	62	122	61	152	54	1534
FORC35_1570	845.529	575.002	564.207	3724.34	1539.21	1387.13	1.82041	2.41239	0.667283	6.47709	0.86426	1.27046	-0.583629	2.69535	0.477	I	short-chain dehydrogenase	1348	431	756	1338	2069	850	1532
FORC35_1571	17596.2	3512.72	2266.53	5372.18	4152.66	2997.83	0.235998	0.853422	0.128808	1.52935	-2.08315	-0.228669	-2.9567	0.612921	0.096	P	thiosulfate-binding protein	28053	2633	3037	1930	5582	1837	1530
FORC35_1572	3888.3	1670.31	928.404	2079.29	1919.36	734.362	0.493623	0.439657	0.238769	1.24485	-1.01852	-1.18555	-2.06632	0.315973	0.402	P	sulfate transport system permease CysT	6199	1252	1244	747	2580	450	1528
FORC35_1573	5979.54	3032.44	2256.83	3262.28	3390.86	995.468	0.567078	0.328273	0.377425	1.07579	-0.818382	-1.60703	-1.40574	0.105402	0.499	P	sulfate/thiosulfate transporter permease subunit	9533	2273	3024	1172	4558	610	1526
FORC35_1574	21564.1	9381.48	11425.2	12982.3	14535.8	3330.74	0.674073	0.355034	0.529824	1.38382	-0.569024	-1.49397	-0.916414	0.46866	0.637	P	sulfate ABC transporter ATP-binding protein	34379	7032	15309	4664	19539	2041	1524
FORC35_1575	4277.82	2424.08	2329.97	2711.14	2985.42	563.011	0.697883	0.232257	0.544662	1.11842	-0.518943	-2.1062	-0.876568	0.161463	0.667	E	cysteine synthase B	6820	1817	3122	974	4013	345	1522
FORC35_1576	368.194	320.187	250.012	289.486	315.429	151.768	0.856693	0.473999	0.679024	0.904114	-0.223149	-1.07704	-0.558466	-0.145423	0.856	J	hypothetical protein	587	240	335	104	424	93	1520
FORC35_1577	2771.18	4431.92	3418.83	3351.35	3573.87	1633.55	1.28966	0.368587	1.23371	0.756185	0.36699	-1.43992	0.303003	-0.403189	0.761	H	hydroxymethylpyrimidine kinase	4418	3322	4581	1204	4804	1001	1518
FORC35_1578	30353.1	40497	34935.3	50590.4	29507.5	40187.6	0.972142	0.992359	1.15096	1.24924	-0.0407613	-0.0110654	0.202842	0.321049	0.973	G	PTS glucose transporter subunit IIA	48391	30355	46811	18175	39664	24626	1516
FORC35_1579	40211.5	89780.4	75900.8	76685.8	59637	68501.3	1.48308	0.762987	1.88754	0.854149	0.568597	-0.39027	0.916505	-0.227441	0.638	G	phosphoenolpyruvate-protein phosphotransferase	64108	67296	101702	27550	80164	41976	1514
FORC35_1580	3637.4	9713.67	8677.3	4475.89	6072.01	5210.71	1.66933	0.53643	2.38557	0.460783	0.739266	-0.898538	1.25434	-1.11784	0.541	G	PTS system phosphohistidinoprotein-hexose phosphotransferase subunit Hpr	5799	7281	11627	1608	8162	3193	1512
FORC35_1581	3.1362	6.6706	11.9409	0	5.2076	0	1.66048	0	3.80744	0	0.731601	-	1.92882	-	0.761		hypothetical protein	5	5	16	0	7	0	1510
FORC35_1582	70577.8	59138.5	55663.2	63876.1	65753.6	32760.7	0.931647	0.553966	0.788679	1.08011	-0.102144	-0.852132	-0.34249	0.111178	0.932	E	cysteine synthase A	112520	44328	74585	22948	88386	20075	1508
FORC35_1583	652.337	664.388	665.705	409.177	359.322	540.164	0.550822	0.813025	1.02049	0.61587	-0.860341	-0.298628	0.0292658	-0.699302	0.48	E	sulfate transporter	1040	498	892	147	483	331	1506
FORC35_1584	12095.8	8067.38	10428.1	7468.17	6730.4	13161.4	0.556423	1.63143	0.862126	0.925725	-0.845746	0.706141	-0.214029	-0.111345	0.485	D	cell division protein ZipA	19284	6047	13973	2683	9047	8065	1504
FORC35_1585	1551.18	2377.39	2118.02	3181.56	2269.01	3405.81	1.46276	1.43258	1.36542	1.33826	0.548694	0.51862	0.449346	0.420356	0.65	L	NAD-dependent DNA ligase LigA	2473	1782	2838	1143	3050	2087	1502
FORC35_1586	65.2337	114.734	135.081	233.815	145.068	141.977	2.22382	1.23745	2.07073	2.03789	1.15304	0.307365	1.05014	1.02708	0.352	S	hypothetical protein	104	86	181	84	195	87	1500
FORC35_1587	648.573	796.465	939.599	642.992	1443.24	629.919	2.22525	0.790894	1.44872	0.807307	1.15397	-0.338444	0.534776	-0.308811	0.345	R	hypothetical protein	1034	597	1259	231	1940	386	1498
FORC35_1588	536.923	294.839	273.894	386.909	460.497	515.685	0.857659	1.74904	0.510118	1.31227	-0.221524	0.806565	-0.971097	0.392066	0.855	K	bacterial regulatory helix-turn-helix, lysR family protein	856	221	367	139	619	316	1496
FORC35_1589	43.28	29.3505	33.5838	22.2681	37.9408	32.6383	0.876636	1.11202	0.775966	0.758696	-0.18995	0.153181	-0.365935	-0.398407	0.906		hypothetical protein	69	22	45	8	51	20	1494
FORC35_1590	3.1362	6.6706	5.2241	0	2.9758	6.5277	0.948855	0.978578	1.66574	0	-0.07574	-0.0312418	0.736165	-	1		hypothetical protein	5	5	7	0	4	4	1484
FORC35_1591	3303.71	5428.5	4083.04	5168.99	6099.54	3347.06	1.84627	0.616571	1.2359	0.952194	0.884614	-0.69766	0.305557	-0.0706729	0.466	J	glutaminyl-tRNA synthetase	5267	4069	5471	1857	8199	2051	1482
FORC35_1592	278.498	285.5	241.803	403.61	359.322	283.953	1.29021	0.994582	0.868241	1.41369	0.367611	-0.00783707	-0.203832	0.49947	0.764		hypothetical protein	444	214	324	145	483	174	1480
FORC35_1593	251.526	302.844	296.283	1330.52	497.694	264.37	1.9787	0.87296	1.17794	4.39342	0.984551	-0.196012	0.23627	2.13535	0.42		hypothetical protein	401	227	397	478	669	162	1478
FORC35_1595	781.549	891.187	569.431	1258.15	926.945	664.19	1.18604	0.745287	0.728593	1.41177	0.246147	-0.424133	-0.456815	0.497502	0.839	T	hypothetical protein	1246	668	763	452	1246	407	1472
FORC35_1596	3677.55	6598.52	3499.43	4448.06	7073.35	3766.46	1.92339	0.570804	0.951565	0.674099	0.94365	-0.808933	-0.0716251	-0.568967	0.437	F	nucleoside permease	5863	4946	4689	1598	9508	2308	1470
FORC35_1597	5323.44	16951.2	1432.91	1316.6	2300.25	3624.48	0.432099	0.213818	0.269169	0.07767	-1.21057	-2.22554	-1.89341	-3.6865	0.321	P	manganese transporter	8487	12706	1920	473	3092	2221	1468
FORC35_1598	607.802	1488.87	223.145	297.836	204.583	324.751	0.336594	0.218119	0.367135	0.200042	-1.57092	-2.19681	-1.44562	-2.32163	0.205		hypothetical protein	969	1116	299	107	275	199	1466
FORC35_1599	1157.27	1016.59	1193.34	754.332	634.578	2354.85	0.548341	2.31642	1.03117	0.74202	-0.866856	1.21189	0.0442828	-0.430471	0.476	P	ion channel protein	1845	762	1599	271	853	1443	1464
FORC35_1600	936.479	2452.1	2187.42	1990.21	2109.06	1775.52	2.25212	0.724084	2.33579	0.811637	1.17128	-0.465772	1.22391	-0.301094	0.337	G	glucokinase	1493	1838	2931	715	2835	1088	1462
FORC35_1601	15.0539	10.6729	18.6576	8.3505	5.9515	17.9511	0.395346	1.68193	1.23939	0.782402	-1.33881	0.75012	0.309626	-0.354018	0.381	G	PTS fructose transporter subunit IIB	24	8	25	3	8	11	1460
FORC35_1602	62.7247	38.6893	65.6749	75.1549	43.8923	68.5405	0.699761	1.77156	1.04703	1.94252	-0.515066	0.825022	0.0663084	0.957933	0.682	G	PTS fructose transporter subunit IIC	100	29	88	27	59	42	1458
FORC35_1603	63.3519	73.3762	74.6306	94.6395	68.4422	97.9149	1.08035	1.33442	1.17803	1.28978	0.111498	0.416216	0.236379	0.36713	0.942	E	aminopeptidase	101	55	100	34	92	60	1456
FORC35_1604	41.3983	37.3551	36.569	38.9692	35.709	48.9575	0.862572	1.3106	0.883345	1.04321	-0.213284	0.390225	-0.17895	0.0610291	0.869	E	exoaminopeptidase	66	28	49	14	48	30	1454
FORC35_1605	188.801	170.766	245.535	186.495	154.739	251.315	0.819586	1.47169	1.30049	1.09211	-0.287032	0.557473	0.379058	0.127117	0.82	G	PTS fructose transporter subunit IIA	301	128	329	67	208	154	1452
FORC35_1606	842.392	601.685	859.744	773.817	740.961	1212.51	0.879591	2.0152	1.0206	1.28608	-0.185094	1.01092	0.0294151	0.362985	0.879	K	AraC family transcriptional regulator	1343	451	1152	278	996	743	1450
FORC35_1607	1827.17	1662.3	2026.97	2095.99	1636.66	2584.95	0.895736	1.55504	1.10935	1.26089	-0.158855	0.636955	0.149711	0.334445	0.895	T	LytTR family transcriptional regulator	2913	1246	2716	753	2200	1584	1448
FORC35_1608	1269.55	983.241	1577.69	1102.27	1040.77	1339.8	0.819794	1.36264	1.24272	1.12106	-0.286666	0.446404	0.3135	0.164863	0.813	T	membrane protein	2024	737	2114	396	1399	821	1446
FORC35_1610	5208.66	2632.2	2078.46	2544.13	2045.08	53019.3	0.392631	20.1426	0.39904	0.966541	-1.34875	4.33217	-1.3254	-0.0490973	0.271	E	aspartate aminotransferase	8304	1973	2785	914	2749	32489	1444
FORC35_1611	0	1.3341	0	0	0	0	-	0	-	0	-	-	-	-	1		membrane protein	0	1	0	0	0	0	1442
FORC35_1612	235.218	217.46	285.835	161.444	149.531	174.615	0.635715	0.802974	1.21519	0.742406	-0.653548	-0.316575	0.281187	-0.42972	0.595	M	lipid A biosynthesis palmitoleoyl acyltransferase	375	163	383	58	201	107	1440
FORC35_1613	349.376	280.164	392.557	1386.19	647.969	623.392	1.85464	2.2251	1.12359	4.94779	0.891143	1.15387	0.168119	2.30678	0.463		hypothetical protein	557	210	526	498	871	382	1438
FORC35_1616	117.922	85.3832	125.379	16.7011	107.871	34.2702	0.914761	0.401369	1.06324	0.195602	-0.128533	-1.317	0.0884614	-2.35401	0.92		hypothetical protein	188	64	168	6	145	21	1436
FORC35_1617	249.644	201.451	176.874	66.8043	200.119	29.3745	0.801617	0.145815	0.708506	0.331616	-0.319015	-2.77779	-0.497148	-1.59242	0.796	C	formyl-CoA transferase	398	151	237	24	269	18	1434
FORC35_1618	659.864	304.178	204.488	91.856	290.879	110.97	0.440817	0.364821	0.309894	0.301981	-1.18175	-1.45474	-1.69015	-1.72747	0.335	E	oxalyl-CoA decarboxylase	1052	228	274	33	391	68	1432
FORC35_1619	383.248	58.7009	81.3473	19.4846	74.3937	57.117	0.194114	0.973017	0.212258	0.33193	-2.36502	-0.0394624	-2.23611	-1.59105	0.064	R	transporter	611	44	109	7	100	35	1430
FORC35_1620	866.855	181.439	177.621	342.372	203.839	708.251	0.235147	3.90352	0.204902	1.88698	-2.08836	1.96477	-2.28699	0.916079	0.096	C	CoA-transferase	1382	136	238	123	274	434	1428
FORC35_1621	3892.07	2277.33	1257.52	4130.74	2636.51	1566.64	0.677407	0.687928	0.3231	1.81385	-0.561905	-0.53967	-1.62995	0.859056	0.642	T	sensory histidine kinase	6205	1707	1685	1484	3544	960	1426
FORC35_1622	1994.64	1252.73	1665.01	732.064	1543.67	1099.91	0.773907	0.87801	0.834739	0.584375	-0.369768	-0.18769	-0.260603	-0.775035	0.759	T	LuxR family transcriptional regulator	3180	939	2231	263	2075	674	1424
FORC35_1623	390.147	66.7056	91.7956	147.526	92.2482	244.787	0.236444	3.66967	0.235284	2.2116	-2.08043	1.87565	-2.08752	1.14509	0.099	V	multidrug transporter	622	50	123	53	124	150	1422
FORC35_1624	404.574	29.3505	54.4803	25.0516	53.5635	55.4851	0.132395	1.89043	0.134661	0.853532	-2.91708	0.918715	-2.8926	-0.228482	0.025	G	multidrug resistance protein Y	645	22	73	9	72	34	1420
FORC35_1625	1243.83	977.904	846.311	1118.97	1102.51	809.43	0.886387	0.827719	0.680407	1.14426	-0.173992	-0.272787	-0.55553	0.19441	0.886	E	D-serine dehydratase	1983	733	1134	402	1482	496	1418
FORC35_1627	1819.02	1811.72	1923.23	1171.86	1342.81	2345.06	0.738205	1.29438	1.05729	0.64682	-0.437907	0.372263	0.0803733	-0.628564	0.717	K	sucrose operon repressor	2900	1358	2577	421	1805	1437	1414
FORC35_1628	424.646	464.271	519.429	798.869	406.19	1062.38	0.956537	2.28827	1.2232	1.72069	-0.0641077	1.19426	0.290665	0.782991	0.959	G	glycosyl hydrolase family 32	677	348	696	287	546	651	1412
FORC35_1629	82.7966	73.3762	97.0197	153.093	89.2724	220.309	1.07821	3.00245	1.17178	2.08642	0.108643	1.58614	0.228706	1.06103	0.933	G	aminoimidazole riboside kinase	132	55	130	55	120	135	1410
FORC35_1630	369.448	116.068	138.066	144.743	132.421	311.696	0.358429	2.68546	0.37371	1.24705	-1.48024	1.42517	-1.42001	0.318524	0.232	P	MFS transporter	589	87	185	52	178	191	1408
FORC35_1631	2079.32	1375.47	1706.05	1784.23	1022.91	2868.91	0.491945	2.08577	0.820486	1.29718	-1.02343	1.06058	-0.28545	0.37538	0.4	P	membrane protein	3315	1031	2286	641	1375	1758	1404
FORC35_1633	3951.65	4011.68	5501.02	3754.96	3890.79	4264.2	0.984598	1.06295	1.39208	0.936008	-0.0223936	0.0880687	0.477242	-0.095407	0.985	M	membrane protein	6300	3007	7371	1349	5230	2613	1402
FORC35_1634	122.94	33.3528	43.2857	19.4846	49.0998	66.9085	0.399379	2.00608	0.352087	0.584197	-1.32417	1.00438	-1.506	-0.775474	0.291		hypothetical protein	196	25	58	7	66	41	1400
FORC35_1635	2631.3	911.199	463.456	3585.17	1518.38	82470.5	0.577044	90.5077	0.176132	3.93456	-0.793247	6.49997	-2.50527	1.9762	0.513	M	long-chain fatty acid outer membrane transporter	4195	683	621	1288	2041	50536	1398
FORC35_1636	239.608	289.502	814.219	1057.74	1315.28	381.868	5.4893	1.31905	3.39813	3.65363	2.45662	0.3995	1.76474	1.86933	0.053	S	hypothetical protein	382	217	1091	380	1768	234	1396
FORC35_1637	866.228	194.78	135.828	1709.08	217.23	4388.22	0.250777	22.5291	0.156804	8.77438	-1.99553	4.49372	-2.67297	3.1333	0.111	I	3-ketoacyl-CoA thiolase	1381	146	182	614	292	2689	1394
FORC35_1638	2805.67	1278.08	1129.16	2892.07	1492.34	12784.4	0.5319	10.0028	0.402456	2.26283	-0.910774	3.32234	-1.3131	1.17813	0.453	I	fatty-acid oxidation protein subunit alpha	4473	958	1513	1039	2006	7834	1392
FORC35_1640	1872.33	2508.13	2097.12	2282.48	1248.33	5406.54	0.666723	2.1556	1.12006	0.910033	-0.584841	1.10809	0.163573	-0.136009	0.629	T	phosphohistidine phosphatase	2985	1880	2810	820	1678	3313	1390
FORC35_1641	25.0899	5.3365	18.6576	2.7835	5.2076	16.3192	0.207558	3.05803	0.74363	0.521597	-2.26842	1.6126	-0.427343	-0.938994	0.121	N	fimbrial protein	40	4	25	1	7	10	1388
FORC35_1642	669.899	522.972	648.54	320.104	445.618	806.166	0.665202	1.54151	0.968115	0.612087	-0.588136	0.624344	-0.0467498	-0.708192	0.627	M	fimbrial protein SteB	1068	392	869	115	599	494	1386
FORC35_1643	3.7635	5.3365	6.7168	5.567	2.2318	3.2638	0.593012	0.611599	1.78472	1.04319	-0.753867	-0.709341	0.835699	0.0610062	0.682		fimbrial protein SteB	6	4	9	2	3	2	1384
FORC35_1644	35.7531	33.3528	50.7488	41.7527	30.5014	42.4298	0.853112	1.27215	1.41942	1.25185	-0.229193	0.34727	0.505305	0.324062	0.886	N	gram-negative pili assembly chaperone, C-terminal domain protein	57	25	68	15	41	26	1382
FORC35_1645	15.6812	12.007	17.9113	5.567	14.8787	11.4234	0.948824	0.951395	1.14221	0.463646	-0.0757875	-0.0718836	0.191834	-1.1089	1		fimbrial protein	25	9	24	2	20	7	1380
FORC35_1646	42.6528	29.3505	38.0616	13.9176	29.0135	16.3192	0.680225	0.556011	0.892359	0.474186	-0.555916	-0.846815	-0.164304	-1.07647	0.688	N	fimbrial protein SteE	68	22	51	5	39	10	1378
FORC35_1647	117.295	65.3715	64.1823	38.9692	75.1376	81.5958	0.640586	1.24819	0.547187	0.596119	-0.642536	0.319833	-0.869895	-0.746327	0.604	N	fimbrial protein	187	49	86	14	101	50	1376
FORC35_1648	1416.32	1013.93	941.838	1099.49	942.568	1865.28	0.665504	1.83966	0.664988	1.08439	-0.587482	0.879441	-0.5886	0.116881	0.627		fimbrial protein	2258	760	1262	395	1267	1143	1374
FORC35_1649	541.314	454.932	461.963	456.496	778.902	403.083	1.43891	0.886029	0.853411	1.00344	0.524976	-0.174575	-0.228688	0.00495161	0.665	S	peptidase S10	863	341	619	164	1047	247	1372
FORC35_1650	2458.18	3097.81	2044.13	1330.52	3461.54	762.105	1.40817	0.246014	0.831563	0.429504	0.493823	-2.02319	-0.266103	-1.21926	0.683	J	N5-glutamine S-adenosyl-L-methionine-dependent methyltransferase	3919	2322	2739	478	4653	467	1370
FORC35_1651	3666.26	4985.58	2783.72	2313.1	4787.23	1385.5	1.30576	0.277901	0.759281	0.463958	0.384884	-1.84736	-0.397294	-1.10793	0.75	E	chorismate synthase	5845	3737	3730	831	6435	849	1368
FORC35_1652	1036.21	1571.58	849.296	887.941	1770.57	500.998	1.7087	0.318785	0.819616	0.564998	0.772895	-1.64934	-0.286979	-0.823684	0.524	M	penicillin-insensitive murein endopeptidase	1652	1178	1138	319	2380	307	1366
FORC35_1653	387.011	653.715	388.825	409.177	679.214	270.898	1.75503	0.414398	1.00469	0.625925	0.811492	-1.27091	0.00674641	-0.675938	0.506	S	membrane protein	617	490	521	147	913	166	1364
FORC35_1654	363.176	700.409	409.722	818.353	857.759	203.989	2.36183	0.291243	1.12816	1.16839	1.2399	-1.7797	0.173977	0.224526	0.312	S	hypothetical protein	579	525	549	294	1153	125	1362
FORC35_1655	213.891	381.556	243.296	489.899	494.718	186.038	2.31294	0.487578	1.13747	1.28395	1.20973	-1.03629	0.185834	0.360588	0.324		hypothetical protein	341	286	326	176	665	114	1360
FORC35_1656	935.225	920.537	754.515	1230.31	1427.61	1142.34	1.52649	1.24095	0.806774	1.33652	0.610222	0.311445	-0.309764	0.418478	0.614	S	putative peptidase	1491	690	1011	442	1919	700	1358
FORC35_1657	4055.15	2317.35	1987.41	2154.44	2968.31	2790.58	0.731985	1.20421	0.490096	0.929699	-0.450114	0.268085	-1.02886	-0.105165	0.709	I	3-oxoacyl-[acyl-carrier-protein] synthase 1	6465	1737	2663	774	3990	1710	1356
FORC35_1658	165.593	198.783	220.16	122.475	178.545	101.179	1.07821	0.508992	1.32953	0.616123	0.108644	-0.974285	0.410911	-0.69871	0.932	G	transporter	264	149	295	44	240	62	1354
FORC35_1659	489.88	493.622	486.591	253.3	495.462	334.543	1.0114	0.677731	0.993288	0.513146	0.0163472	-0.561215	-0.00971669	-0.962559	0.991		flagellar regulator flk	781	370	652	91	666	205	1352
FORC35_1660	1928.16	2589.51	2276.98	1550.42	1788.42	2743.25	0.927531	1.05937	1.18091	0.59873	-0.108533	0.083206	0.239899	-0.740023	0.929	E	erythronate-4-phosphate dehydrogenase	3074	1941	3051	557	2404	1681	1350
FORC35_1661	3.1362	6.6706	0.7463	2.7835	2.2318	3.2638	0.711626	0.489281	0.237963	0.417279	-0.49081	-1.03126	-2.07119	-1.26092	0.823		hypothetical protein	5	5	1	1	3	2	1348
FORC35_1662	607.802	1399.48	778.397	1263.72	1124.83	817.59	1.85066	0.584208	1.28067	0.902987	0.888037	-0.775446	0.356904	-0.147223	0.465	E	semialdehyde dehydrogenase, NAD binding domain protein	969	1049	1043	454	1512	501	1346
FORC35_1663	294.179	684.399	378.377	776.601	577.295	339.438	1.9624	0.495965	1.28621	1.13472	0.972616	-1.01169	0.363131	0.182334	0.426	J	tRNA pseudouridine synthase A	469	513	507	279	776	208	1344
FORC35_1664	344.986	709.748	422.409	264.434	475.376	225.204	1.37796	0.317302	1.22442	0.372575	0.462532	-1.65607	0.292104	-1.4244	0.703	S	membrane protein	550	532	566	95	639	138	1342
FORC35_1665	4859.91	6146.25	5228.62	2560.83	4665.23	2111.7	0.959942	0.343575	1.07587	0.416649	-0.0589811	-1.5413	0.105501	-1.26309	0.961	I	acetyl-CoA carboxylase subunit beta	7748	4607	7006	920	6271	1294	1340
FORC35_1666	810.403	1215.38	897.059	1188.56	1129.3	943.247	1.3935	0.776095	1.10693	0.977936	0.478713	-0.365695	0.146564	-0.0321875	0.692	H	folC protein	1292	911	1202	427	1518	578	1338
FORC35_1667	721.961	1073.96	860.49	1010.42	985.716	988.941	1.36533	0.920836	1.19188	0.940832	0.449252	-0.118985	0.253238	-0.0879917	0.711	S	cell division protein DedD	1151	805	1153	363	1325	606	1336
FORC35_1668	300.451	1983.82	979.153	985.364	374.944	334.543	1.24794	0.168635	3.25894	0.496699	0.319545	-2.56802	1.7044	-1.00956	0.793	R	colicin V production protein	479	1487	1312	354	504	205	1334
FORC35_1669	1354.23	9042.61	3863.62	7857.86	1969.2	1953.4	1.45412	0.216022	2.85301	0.868981	0.540142	-2.21075	1.51249	-0.202603	0.655	F	amidophosphoribosyltransferase	2159	6778	5177	2823	2647	1197	1332
FORC35_1670	303.587	190.778	208.966	83.5054	156.971	120.762	0.517053	0.632996	0.688321	0.43771	-0.951617	-0.659731	-0.538846	-1.19195	0.439	H	3-octaprenyl-4-hydroxybenzoate carboxy-lyase	484	143	280	30	211	74	1330
FORC35_1671	7350.7	4526.64	1873.23	6443.84	4491.15	20103.6	0.610982	4.44117	0.254836	1.42354	-0.710798	2.15094	-1.97236	0.509478	0.557	E	amino acid ABC transporter substrate-binding protein	11719	3393	2510	2315	6037	12319	1328
FORC35_1672	6968.08	8734.43	6157.77	8005.39	14451.7	4587.31	2.07399	0.525199	0.88371	0.916532	1.05241	-0.929064	-0.178354	-0.125743	0.387	E	zinc transporter	11109	6547	8251	2876	19426	2811	1326
FORC35_1673	1914.36	1759.69	854.52	1372.27	2789.76	1158.66	1.45728	0.658444	0.446374	0.779836	0.543283	-0.602867	-1.16367	-0.358757	0.653	E	histidine/lysine/arginine/ornithine ABC transporter permease HisQ	3052	1319	1145	493	3750	710	1324
FORC35_1674	913.898	788.46	491.069	453.713	1240.14	607.073	1.35698	0.769947	0.537334	0.575442	0.4404	-0.377169	-0.896108	-0.797259	0.716	E	histidine/lysine/arginine/ornithine ABC transporter permease HisM	1457	591	658	163	1667	372	1322
FORC35_1675	1812.12	1096.64	870.192	634.641	1411.99	1489.94	0.779195	1.35864	0.480208	0.578714	-0.359943	0.442163	-1.05827	-0.789077	0.766	E	histidine ABC transporter ATP-binding protein	2889	822	1166	228	1898	913	1320
FORC35_1676	960.315	583.007	412.707	445.362	414.373	558.115	0.431497	0.957304	0.429762	0.763906	-1.21258	-0.0629505	-1.21839	-0.388534	0.322	S	transposase	1531	437	553	160	557	342	1318
FORC35_1677	2967.5	2472.11	2331.46	6176.62	2213.21	5196.02	0.745816	2.10186	0.785663	2.49852	-0.423108	1.07166	-0.348017	1.32107	0.726	R	epimerase	4731	1853	3124	2219	2975	3184	1316
FORC35_1678	948.397	991.245	912.732	551.136	1086.89	1047.69	1.14603	1.05694	0.962394	0.556004	0.196645	0.0798976	-0.0553001	-0.846834	0.871	H	D-erythro-7,8-dihydroneopterin triphosphate 2'-epimerase	1512	743	1223	198	1461	642	1314
FORC35_1679	1426.99	880.514	1886.66	1636.71	790.805	3020.68	0.554178	3.43058	1.32213	1.85881	-0.851578	1.77845	0.402864	0.894378	0.483	O	GSH-dependent disulfide bond oxidoreductase	2275	660	2528	588	1063	1851	1312
FORC35_1680	1432	928.542	1404.55	1338.87	764.767	2054.58	0.534054	2.2127	0.980826	1.44191	-0.904943	1.14581	-0.0279306	0.527977	0.457	O	glutathione S-transferase	2283	696	1882	481	1028	1259	1310
FORC35_1681	1915.61	2790.96	2479.97	2599.8	3006.25	2087.22	1.56934	0.747849	1.29461	0.931507	0.65016	-0.41918	0.37252	-0.102361	0.591	R	phosphodiesterase	3054	2092	3323	934	4041	1279	1308
FORC35_1682	1396.25	2135.91	1736.65	1759.18	2419.28	1372.44	1.7327	0.642555	1.2438	0.82362	0.793021	-0.638109	0.314751	-0.279949	0.513	I	NUDIX hydrolase	2226	1601	2327	632	3252	841	1306
FORC35_1683	109.141	150.755	207.473	161.444	172.593	97.9149	1.58138	0.649498	1.90096	1.0709	0.661185	-0.622603	0.926732	0.0988291	0.591	S	membrane protein	174	113	278	58	232	60	1304
FORC35_1684	7780.37	16665.7	9357.93	34688.2	14346.1	9548.34	1.84388	0.572933	1.20276	2.08141	0.882746	-0.803563	0.266351	1.05756	0.467	C	phosphate acetyltransferase	12404	12492	12539	12462	19284	5851	1302
FORC35_1685	10245.4	11214.5	9383.3	13004.6	6557.06	15072.4	0.639997	1.344	0.915851	1.15962	-0.643862	0.426535	-0.126816	0.213648	0.594	C	acetate kinase	16334	8406	12573	4672	8814	9236	1300
FORC35_1686	11.2904	16.0094	19.404	50.1033	10.4151	53.8532	0.922474	3.36385	1.71863	3.12962	-0.11642	1.75011	0.781257	1.64599	0.945		hypothetical protein	18	12	26	18	14	33	1298
FORC35_1687	1615.79	1362.13	2226.98	1809.28	918.018	3324.21	0.568155	2.44045	1.37826	1.32828	-0.815643	1.28715	0.462849	0.409556	0.501	S	membrane protein	2576	1021	2984	650	1234	2037	1296
FORC35_1688	4346.19	8789.13	9532.56	7855.08	8027.08	4285.41	1.84692	0.487581	2.19331	0.893726	0.885123	-1.03629	1.13311	-0.162095	0.466	S	hypothetical protein	6929	6588	12773	2822	10790	2626	1294
FORC35_1689	4428.36	9318.77	10162.4	9611.48	8564.94	4429.02	1.93411	0.475279	2.29485	1.03141	0.951671	-1.07315	1.1984	0.0446178	0.433	R	putative phosphatase	7060	6985	13617	3453	11513	2714	1292
FORC35_1690	714.434	1028.6	1134.38	1464.13	1633.69	833.909	2.28669	0.810722	1.58781	1.42342	1.19326	-0.302721	0.667037	0.50936	0.329	P	citrate transporter	1139	771	1520	526	2196	511	1290
FORC35_1691	582.712	655.049	729.141	320.104	722.363	261.106	1.23966	0.398606	1.25129	0.488672	0.30994	-1.32696	0.323414	-1.03306	0.799	R	5'-nucleotidase	929	491	977	115	971	160	1288
FORC35_1692	7415.94	4009.01	3182.99	1823.2	3921.29	1649.87	0.528765	0.41154	0.42921	0.454776	-0.9193	-1.2809	-1.22024	-1.13677	0.449	E	aminotransferase AlaT	11823	3005	4265	655	5271	1011	1286
FORC35_1693	1022.41	739.098	716.453	637.425	1008.78	704.987	0.986665	0.953848	0.700748	0.862436	-0.0193674	-0.0681682	-0.513032	-0.213511	0.988	K	transcriptional regulator	1630	554	960	229	1356	432	1284
FORC35_1694	127.331	34.6869	29.8522	41.7527	55.0513	52.2213	0.432348	1.5055	0.234445	1.2037	-1.20974	0.590247	-2.09268	0.267479	0.337		hypothetical protein	203	26	40	15	74	32	1282
FORC35_1695	3641.17	1057.95	928.404	1208.05	1929.77	1835.9	0.529987	1.73534	0.254974	1.14187	-0.91597	0.795219	-1.97158	0.191402	0.451	C	NADH	5805	793	1244	434	2594	1125	1280
FORC35_1696	8356.81	2425.42	1891.88	3699.29	4202.5	4659.12	0.502883	1.92096	0.226388	1.52522	-0.991704	0.941825	-2.14313	0.609016	0.414	C	NADH dehydrogenase subunit B	13323	1818	2535	1329	5649	2855	1278
FORC35_1697	15865.6	6603.86	4895.02	9722.82	11139.7	8255.86	0.702131	1.25016	0.308531	1.47229	-0.510188	0.32211	-1.69651	0.558066	0.672	C	NADH-quinone oxidoreductase subunit C/D	25294	4950	6559	3493	14974	5059	1276
FORC35_1698	3199.59	1802.39	2338.92	3582.38	4561.08	2039.89	1.42552	1.13177	0.731008	1.98758	0.51149	0.178587	-0.452041	0.991012	0.672	C	NADH dehydrogenase subunit E	5101	1351	3134	1287	6131	1250	1274
FORC35_1699	7557.07	4153.09	7199.61	7381.88	11034.8	5018.14	1.4602	1.20829	0.952699	1.77744	0.546164	0.272967	-0.0699077	0.829803	0.651	C	NADH dehydrogenase subunit F	12048	3113	9647	2652	14833	3075	1272
FORC35_1700	19144.2	12037.7	16742.6	24447.6	25607.1	13944.7	1.33759	1.15842	0.874553	2.03092	0.419634	0.21216	-0.193382	1.02213	0.728	C	NADH dehydrogenase subunit G	30521	9023	22434	8783	34421	8545	1270
FORC35_1701	5147.81	3120.49	5306.23	7457.03	7277.19	3737.09	1.41365	1.1976	1.03077	2.3897	0.499422	0.260142	0.0437282	1.25683	0.679	C	NADH-quinone oxidoreductase subunit H	8207	2339	7110	2679	9782	2290	1268
FORC35_1702	1899.3	1172.68	1912.78	2686.09	2582.2	1246.78	1.35955	1.06319	1.0071	2.29055	0.443133	0.0883959	0.0102019	1.19569	0.714	C	NADH dehydrogenase subunit I	3028	879	2563	965	3471	764	1266
FORC35_1703	2258.09	1318.1	2389.67	2466.19	2801.67	1731.46	1.24073	1.3136	1.05827	1.87102	0.311183	0.393528	0.0817101	0.903823	0.796	C	NADH	3600	988	3202	886	3766	1061	1264
FORC35_1704	685.581	496.29	788.845	954.745	934.385	700.092	1.36291	1.41065	1.15062	1.92377	0.44669	0.496362	0.202416	0.943934	0.712	C	NADH	1093	372	1057	343	1256	429	1262
FORC35_1705	7165.67	4106.4	6858.55	10338	9522.39	5646.43	1.32889	1.37503	0.95714	2.51753	0.410223	0.459465	-0.0631975	1.33201	0.734	C	NADH	11424	3078	9190	3714	12800	3460	1260
FORC35_1706	2524.67	1702.33	3070.3	4169.7	3763.58	2092.12	1.49072	1.22897	1.21612	2.44941	0.576011	0.297454	0.282287	1.29244	0.634	C	NADH-quinone oxidoreductase subunit M	4025	1276	4114	1498	5059	1282	1258
FORC35_1707	6537.79	5018.93	7923.53	9065.91	10322.1	4706.44	1.57884	0.937739	1.21196	1.80634	0.658865	-0.0927422	0.277339	0.853071	0.586	C	NADH	10423	3762	10617	3257	13875	2884	1256
FORC35_1708	86.56	97.3902	124.633	122.475	114.566	84.8596	1.32355	0.871336	1.43985	1.25757	0.40441	-0.198699	0.525914	0.330634	0.747		hypothetical protein	138	73	167	44	154	52	1254
FORC35_1709	66.4881	33.3528	59.7045	27.8351	44.6362	21.2149	0.671341	0.636076	0.897973	0.834566	-0.574882	-0.65273	-0.155256	-0.260903	0.65	R	hypothetical protein	106	25	80	10	60	13	1252
FORC35_1710	237.099	178.771	382.108	186.495	168.874	75.0681	0.712249	0.419912	1.6116	1.04321	-0.489546	-1.25184	0.688492	0.0610281	0.689	R	hypothetical protein	378	134	512	67	227	46	1250
FORC35_1711	211.382	101.392	138.066	164.227	76.6255	140.345	0.362498	1.38417	0.653161	1.61972	-1.46396	0.469024	-0.61449	0.695744	0.239	O	deubiquitinase	337	76	185	59	103	86	1248
FORC35_1712	3.7635	2.6682	2.9852	0	1.4879	0	0.39535	0	0.793198	0	-1.3388	-	-0.334247	-	0.494		hypothetical protein	6	2	4	0	2	0	1246
FORC35_1713	356.276	308.18	362.704	133.609	334.028	303.536	0.937553	0.984932	1.01804	0.433541	-0.093028	-0.0219037	0.0257989	-1.20576	0.94	R	ribonuclease Z	568	231	486	48	449	186	1244
FORC35_1714	498.661	554.991	553.013	734.848	644.993	734.362	1.29345	1.3232	1.10899	1.32407	0.371225	0.404028	0.149252	0.404982	0.76	R	acyltransferase	795	416	741	264	867	450	1242
FORC35_1715	13639.5	19332.6	29235.8	62949.2	8869.22	48210	0.650261	2.49372	2.14347	3.25611	-0.62091	1.3183	1.09995	1.70315	0.607	S	membrane protein	21745	14491	39174	22615	11922	29542	1240
FORC35_1716	2910.42	2261.32	2870.29	2363.2	1208.9	3932.92	0.415368	1.73921	0.986211	1.04505	-1.26754	0.798434	-0.0200324	0.0635788	0.3	H	isochorismate synthase	4640	1695	3846	849	1625	2410	1238
FORC35_1717	1216.23	1175.35	1612.02	2833.62	1324.95	2666.55	1.08939	2.26872	1.32542	2.41087	0.123522	1.18188	0.406452	1.26955	0.919	H	2-succinyl-5-enolpyruvyl-6-hydroxy-3-cyclohexene-1-carboxylate synthase	1939	881	2160	1018	1781	1634	1236
FORC35_1719	3925.31	4251.82	6573.46	9374.88	4816.25	7186.96	1.22697	1.69033	1.67463	2.20491	0.295103	0.757302	0.743846	1.14072	0.807	H	dihydroxynaphthoic acid synthetase	6258	3187	8808	3368	6474	4404	1232
FORC35_1720	2047.33	2738.93	3518.08	5984.56	2974.26	3276.89	1.45275	1.19641	1.71837	2.185	0.538785	0.258712	0.781044	1.12763	0.656	H	O-succinylbenzoate synthase	3264	2053	4714	2150	3998	2008	1230
FORC35_1721	1251.36	1580.92	1391.86	2418.87	1355.45	1565.01	1.08319	0.989933	1.11228	1.53004	0.115282	-0.0145979	0.15352	0.613569	0.924	I	O-succinylbenzoic acid--CoA ligase	1995	1185	1865	869	1822	959	1228
FORC35_1722	99.105	125.406	61.9434	155.877	111.591	71.8043	1.12598	0.572572	0.625028	1.24297	0.171184	-0.80447	-0.678007	0.313794	0.896		signal transduction protein PmrD	158	94	83	56	150	44	1226
FORC35_1723	225.809	106.729	163.441	180.928	103.407	208.885	0.457941	1.95716	0.723802	1.69521	-1.12677	0.968758	-0.466333	0.761467	0.359		4-amino-4-deoxy-L-arabinose-phospho-UDP flippase subunit F	360	80	219	65	139	128	1224
FORC35_1724	329.305	145.418	244.788	300.62	122.006	386.764	0.370495	2.65967	0.743349	2.06728	-1.43247	1.41125	-0.427888	1.04773	0.248	P	4-amino-4-deoxy-L-arabinose-phospho-UDP flippase subunit E	525	109	328	108	164	237	1222
FORC35_1725	1777.62	787.126	910.493	1736.91	645.737	1808.16	0.36326	2.29717	0.512199	2.20665	-1.46093	1.19986	-0.965225	1.14186	0.235	M	4-amino-4-deoxy-L-arabinose transferase	2834	590	1220	624	868	1108	1220
FORC35_1726	2206.65	458.935	661.227	1155.16	546.794	931.824	0.247793	2.03041	0.299651	2.51704	-2.01279	1.02177	-1.73864	1.33173	0.107	G	4-deoxy-4-formamido-L-arabinose-phospho-UDP deformylase	3518	344	886	415	735	571	1218
FORC35_1727	8014.33	1643.63	1499.33	3810.63	1477.46	2824.85	0.184352	1.71867	0.187081	2.31843	-2.43946	0.78129	-2.41827	1.21315	0.054	J	UDP-glucuronic acid decarboxylase/UDP-4-amino-4-deoxy-L-arabinose formyltransferase	12777	1232	2009	1369	1986	1731	1216
FORC35_1728	3829.97	408.238	535.101	592.889	372.712	835.541	0.0973148	2.0467	0.139714	1.45231	-3.3612	1.0333	-2.83945	0.53835	0.011	M	UDP phosphate 4-deoxy-4-formamido-L-arabinose transferase	6106	306	717	213	501	512	1214
FORC35_1729	5605.7	685.734	909	701.446	438.179	2049.69	0.0781666	2.98904	0.162156	1.02291	-3.6773	1.57968	-2.62454	0.0326828	0.006	E	putative enzyme	8937	514	1218	252	589	1256	1212
FORC35_1730	424.019	54.6986	56.7192	16.7011	37.1968	52.2213	0.0877244	0.95471	0.133766	0.30533	-3.51088	-0.0668655	-2.90222	-1.71156	0.009	G	lipopolysaccharide core heptose(II)-phosphate phosphatase	676	41	76	6	50	32	1210
FORC35_1731	450.99	405.57	367.929	567.837	674.751	203.989	1.49615	0.50297	0.815824	1.4001	0.581258	-0.991457	-0.29367	0.485525	0.631	F	nucleoside triphosphatase NudI	719	304	493	204	907	125	1208
FORC35_1732	49.5525	108.063	56.7192	22.2681	94.48	27.7426	1.90666	0.256726	1.14463	0.206066	0.931051	-1.9617	0.194879	-2.27882	0.454		membrane protein	79	81	76	8	127	17	1206
FORC35_1733	1441.41	1922.46	1419.47	882.374	2126.92	1346.33	1.47558	0.700318	0.984779	0.458983	0.561279	-0.513918	-0.022128	-1.12349	0.642	H	hypothetical protein	2298	1441	1902	317	2859	825	1204
FORC35_1735	203.855	278.829	208.966	180.928	191.936	146.872	0.94153	0.526746	1.02507	0.648886	-0.0869217	-0.924819	0.0357207	-0.623964	0.947	S	hypothetical protein	325	209	280	65	258	90	1200
FORC35_1736	141.131	149.421	169.411	130.825	127.957	210.517	0.906658	1.40889	1.20039	0.87555	-0.14137	0.494558	0.263501	-0.191739	0.909	C	sn-glycerol-3-phosphate dehydrogenase subunit C	225	112	227	47	172	129	1198
FORC35_1737	93.4598	65.3715	81.3473	111.341	87.0406	83.2277	0.931316	1.27315	0.870399	1.7032	-0.102657	0.348402	-0.200251	0.768246	0.936	E	glycerol-3-phosphate dehydrogenase subunit B	149	49	109	40	117	51	1196
FORC35_1738	69.6244	40.0234	79.1084	75.1549	67.6983	42.4298	0.972336	1.06012	1.13622	1.87777	-0.0404734	0.0842341	0.184238	0.909023	0.981	C	sn-glycerol-3-phosphate dehydrogenase subunit A	111	30	106	27	91	26	1194
FORC35_1739	4.3907	2.6682	7.4631	5.567	3.7197	0	0.847177	0	1.69975	2.08643	-0.239265	-	0.765324	1.06103	1		hypothetical protein	7	2	10	2	5	0	1192
FORC35_1740	220.164	165.43	213.443	278.351	184.496	357.389	0.837996	2.16037	0.969476	1.68259	-0.254984	1.11128	-0.0447224	0.750687	0.837	G	sn-glycerol-3-phosphate transporter	351	124	286	100	248	219	1190
FORC35_1741	1247.59	1424.83	1350.07	1976.3	1178.4	1610.7	0.944535	1.13045	1.08214	1.38704	-0.0823236	0.176897	0.113883	0.472007	0.946	C	glycerophosphodiester phosphodiesterase	1989	1068	1809	710	1584	987	1188
FORC35_1742	160.575	66.7056	172.397	83.5054	55.0513	195.83	0.342838	2.93573	1.07362	1.25185	-1.5444	1.55372	0.102483	0.324062	0.22		hypothetical protein	256	50	231	30	74	120	1186
FORC35_1743	3.7635	1.3341	1.4926	0	1.4879	1.6319	0.39535	1.22322	0.396599	0	-1.3388	0.290686	-1.33425	-	0.494		hypothetical protein	6	1	2	0	2	1	1184
FORC35_1744	1.8817	2.6682	2.9852	0	2.2318	0	1.18606	0	1.58644	0	0.246171	-	0.665791	-	1		hypothetical protein	3	2	4	0	3	0	1182
FORC35_1745	620.974	615.026	916.463	790.518	632.346	1664.55	1.01831	2.70648	1.47585	1.28534	0.0261815	1.43642	0.561544	0.362152	0.984		hypothetical protein	990	461	1228	284	850	1020	1180
FORC35_1746	113.532	490.953	340.315	356.29	624.907	89.7554	5.50426	0.182819	2.99754	0.72571	2.46055	-2.45152	1.58378	-0.462535	0.053	C	2Fe-2S ferredoxin	181	368	456	128	840	55	1178
FORC35_1747	1679.77	9212.04	5026.37	5990.12	11340.6	2519.68	6.75128	0.27352	2.9923	0.650249	2.75516	-1.87028	1.58126	-0.620936	0.032	F	ribonucleotide-diphosphate reductase subunit beta	2678	6905	6735	2152	15244	1544	1176
FORC35_1748	1020.53	10700.9	5279.37	9823.02	13389.4	3025.57	13.12	0.28274	5.17316	0.917961	3.7137	-1.82245	2.37105	-0.123495	0.005	F	ribonucleotide-diphosphate reductase subunit alpha	1627	8021	7074	3529	17998	1854	1174
FORC35_1749	785.313	867.173	858.251	1038.25	754.352	1090.12	0.960575	1.2571	1.09288	1.19728	-0.0580295	0.330095	0.128133	0.259764	0.962	M	adhesin	1252	650	1150	373	1014	668	1172
FORC35_1751	6291.28	16216.1	9116.87	12648.3	22733.2	3247.51	3.61345	0.200264	1.44913	0.779982	1.85338	-2.32002	0.535184	-0.358488	0.135	L	DNA gyrase subunit A	10030	12155	12216	4544	30558	1990	1168
FORC35_1752	123.568	162.762	189.562	100.207	151.763	176.247	1.22818	1.08285	1.53407	0.615664	0.296521	0.114837	0.617366	-0.699785	0.813	S	hypothetical protein	197	122	254	36	204	108	1166
FORC35_1753	25.0899	30.6846	35.0764	11.1341	29.7575	9.7915	1.18604	0.319101	1.39803	0.362856	0.246147	-1.64791	0.483394	-1.46253	0.864	S	hypothetical protein	40	23	47	4	40	6	1164
FORC35_1754	316.132	413.575	416.438	225.465	288.647	496.102	0.913059	1.19955	1.31729	0.545161	-0.13122	0.262489	0.397575	-0.875247	0.916	R	hypothetical protein	504	310	558	81	388	304	1162
FORC35_1755	121.686	168.098	145.53	153.093	127.213	171.351	1.04542	1.01935	1.19594	0.910738	0.0640864	0.027652	0.258151	-0.134892	0.964	S	hypothetical protein	194	126	195	55	171	105	1160
FORC35_1756	71.5061	80.0467	93.2882	80.7219	63.2346	125.657	0.884325	1.5698	1.30462	1.00844	-0.177352	0.650583	0.383628	0.0121182	0.896	S	hypothetical protein	114	60	125	29	85	77	1158
FORC35_1757	125.449	116.068	125.379	130.825	92.2482	210.517	0.735342	1.81374	0.999442	1.12714	-0.443512	0.85897	-0.00080524	0.172673	0.719	I	acetyl-CoA acetyltransferase	200	87	168	47	124	129	1156
FORC35_1758	55.1977	89.3855	77.6158	64.0208	58.0271	83.2277	1.05126	0.93111	1.40614	0.716232	0.0721187	-0.102977	0.491742	-0.4815	0.966	I	short-chain fatty acid transporter	88	67	104	23	78	51	1154
FORC35_1760	11.9177	14.6752	26.1207	5.567	26.7817	19.583	2.24722	1.33443	2.19176	0.379347	1.16814	0.416222	1.13209	-1.39841	0.378	I	acetyl-CoA	19	11	35	2	36	12	1150
FORC35_1761	711.925	493.622	512.712	590.105	486.535	949.775	0.683407	1.9241	0.720177	1.19546	-0.549183	0.94418	-0.473577	0.257567	0.651	T	acetoacetate metabolism regulatory protein AtoC	1135	370	687	212	654	582	1148
FORC35_1762	472.317	370.883	450.769	3164.86	466.448	1070.54	0.987575	2.88645	0.954378	8.5333	-0.0180371	1.5293	-0.0673675	3.0931	0.99	T	histidine kinase	753	278	604	1137	627	656	1146
FORC35_1763	2936.77	3007.09	1941.14	3228.88	2896.15	2278.15	0.986168	0.757595	0.660978	1.07376	-0.0200953	-0.400502	-0.597325	0.102665	0.987	T	sensory histidine kinase	4682	2254	2601	1160	3893	1396	1144
FORC35_1764	6347.11	6908.03	5643.56	4230.94	6493.82	4850.05	1.02312	0.702089	0.889155	0.612467	0.0329689	-0.510274	-0.169493	-0.707296	0.978	T	transcriptional regulator	10119	5178	7562	1520	8729	2972	1142
FORC35_1765	4659.82	5592.6	3179.26	4141.87	4441.3	2815.05	0.953107	0.503354	0.682272	0.740598	-0.0692898	-0.990356	-0.551581	-0.433237	0.954	T	phosphotransfer intermediate protein in two-component regulatory system with RcsBC	7429	4192	4260	1488	5970	1725	1140
FORC35_1766	0	0	0	0	0	0	-	-	-	-	-	-	-	-	1		hypothetical protein	0	0	0	0	0	0	1138
FORC35_1767	235382	527084	440768	704627	321561	105626	1.36612	0.200397	1.87256	1.33684	0.450088	-2.31907	0.905013	0.418828	0.709	M	outer membrane porin protein C	375263	395082	590600	253143	432243	64725	1136
FORC35_1768	156.812	296.173	323.897	125.258	270.793	70.1724	1.72687	0.236931	2.06551	0.422923	0.788157	-2.07746	1.0465	-1.24153	0.522	H	thiamine biosynthesis lipoprotein ApbE	250	222	434	45	364	43	1134
FORC35_1769	563.895	769.783	1119.46	2301.97	915.786	3032.1	1.62404	3.9389	1.98523	2.99041	0.699585	1.97779	0.989303	1.58034	0.563	F	transcriptional activator/DNA repair enzyme Ada	899	577	1500	827	1231	1858	1132
FORC35_1770	156.184	165.43	264.938	478.764	228.389	556.483	1.4623	3.36386	1.69632	2.89406	0.54824	1.75012	0.762407	1.5331	0.657	L	alpha-ketoglutarate-dependent dioxygenase	249	124	355	172	307	341	1130
FORC35_1771	731.997	868.507	717.2	545.569	933.641	458.568	1.27547	0.527996	0.979785	0.628169	0.35103	-0.921401	-0.0294625	-0.670776	0.772	V	ABC transporter ATP-binding protein YojI	1167	651	961	196	1255	281	1128
FORC35_1772	521.869	1882.43	366.436	865.673	2723.55	479.783	5.21884	0.254874	0.702161	0.459869	2.38373	-1.97214	-0.510127	-1.1207	0.06	C	malate dehydrogenase (acceptor)	832	1411	491	311	3661	294	1126
FORC35_1773	336.204	306.846	433.604	617.94	422.556	571.17	1.25684	1.86142	1.2897	2.01385	0.329805	0.896407	0.367039	1.00995	0.786	R	ecotin	536	230	581	222	568	350	1124
FORC35_1774	6.8997	8.0047	5.2241	8.3505	4.4636	9.7915	0.646927	1.22322	0.757149	1.0432	-0.628326	0.290683	-0.401351	0.0610152	0.809		hypothetical protein	11	6	7	3	6	6	1122
FORC35_1775	85.3055	92.0537	514.951	55.6703	565.392	31.0064	6.62785	0.336829	6.03655	0.604759	2.72854	-1.56991	2.59372	-0.725568	0.034	D	ferredoxin	136	69	690	20	760	19	1120
FORC35_1776	23.2081	10.6729	82.0936	22.2681	96.7118	3.2638	4.16716	0.305803	3.53728	2.08642	2.05906	-1.70933	1.82264	1.06103	0.112	P	nitrate reductase	37	8	110	8	130	2	1118
FORC35_1777	617.838	282.832	1445.59	765.466	2379.11	269.266	3.8507	0.952036	2.33976	2.70644	1.94512	-0.0709117	1.22636	1.43639	0.118	C	periplasmic nitrate reductase, large subunit	985	212	1937	275	3198	165	1116
FORC35_1778	65.2337	42.6916	86.5715	150.31	251.451	35.9021	3.85461	0.840964	1.3271	3.52083	1.94659	-0.249884	0.408275	1.81591	0.121	C	mauM/NapG ferredoxin-type family protein	104	32	116	54	338	22	1114
FORC35_1779	65.8609	52.0304	76.1232	89.0725	210.534	44.0617	3.19665	0.846845	1.15582	1.71193	1.67656	-0.23983	0.208914	0.775625	0.179	C	quinol dehydrogenase	105	39	102	32	283	27	1112
FORC35_1780	57.7067	52.0304	44.032	75.1549	175.569	48.9575	3.04244	0.94094	0.763031	1.44444	1.60523	-0.0878249	-0.390186	0.530512	0.198	C	nitrate reductase cytochrome C550 subunit	92	39	59	27	236	30	1110
FORC35_1782	230.827	300.175	294.044	322.888	421.812	297.009	1.8274	0.989451	1.27387	1.07566	0.86979	-0.0153001	0.349223	0.105228	0.477	O	cytochrome C biogenesis protein CcmA	368	225	394	116	567	182	1106
FORC35_1783	95.9687	96.0561	138.066	116.908	130.189	91.3873	1.35658	0.951395	1.43866	1.21708	0.439972	-0.0718835	0.524727	0.28342	0.718	O	heme ABC transporter permease	153	72	185	42	175	56	1104
FORC35_1784	169.357	196.114	164.934	317.321	229.133	192.566	1.35296	0.981906	0.973883	1.61804	0.436119	-0.0263432	-0.0381798	0.694245	0.724	O	heme ABC transporter permease	270	147	221	114	308	118	1102
FORC35_1785	8.1542	9.3388	14.9261	30.6187	18.5984	21.2149	2.28084	2.27169	1.83048	3.27865	1.18956	1.18377	0.872222	1.7131	0.411	U	cytochrome C biogenesis protein CcmD	13	7	20	11	25	13	1100
FORC35_1786	105.377	148.087	120.155	258.867	179.289	115.866	1.7014	0.782421	1.14024	1.74808	0.76672	-0.353983	0.189334	0.80577	0.534	O	cytochrome C biogenesis protein	168	111	161	93	241	71	1098
FORC35_1787	171.866	250.813	263.446	517.734	383.871	274.162	2.23356	1.09309	1.53286	2.06422	1.15934	0.128415	0.616226	1.0456	0.346	O	heme lyase subunit CcmF	274	188	353	186	516	168	1096
FORC35_1788	176.884	354.874	277.626	581.755	460.497	225.204	2.60339	0.634604	1.56954	1.63933	1.38039	-0.656071	0.650341	0.713104	0.263	O	thiol	282	266	372	209	619	138	1094
FORC35_1789	447.854	699.075	770.187	1188.56	1091.36	396.555	2.43685	0.567258	1.71973	1.70019	1.28502	-0.817924	0.782181	0.765697	0.294	O	heme lyase subunit CcmH	714	524	1032	427	1467	243	1092
FORC35_1790	506.188	252.147	283.596	253.3	363.041	649.502	0.717206	2.57589	0.560258	1.00457	-0.47954	1.36507	-0.835836	0.00657973	0.692	T	transcriptional regulator	807	189	380	91	488	398	1090
FORC35_1791	176.884	52.0304	53.734	25.0516	39.4287	58.749	0.222908	1.12913	0.303782	0.48148	-2.16548	0.175209	-1.71889	-1.05445	0.091	M	hypothetical protein	282	39	72	9	53	36	1088
FORC35_1792	967.842	757.776	809.742	506.6	615.98	1075.43	0.636447	1.4192	0.836647	0.668535	-0.651888	0.505074	-0.257309	-0.580925	0.591	S	hypothetical protein	1543	568	1085	182	828	659	1086
FORC35_1793	0	0	2.9852	0	0.7439	0	-	-	-	-	-	-	-	-	1		hypothetical protein	0	0	4	0	1	0	1084
FORC35_1794	0	0	0	0	0	0	-	-	-	-	-	-	-	-	1		hypothetical protein	0	0	0	0	0	0	9926
FORC35_1796	1.2545	1.3341	1.4926	2.7835	0	0	0	0	1.1898	2.08643	-	-	0.250715	1.06103	0.569		hypothetical protein	2	1	2	1	0	0	9928
FORC35_1797	394.538	290.837	405.99	1160.73	583.246	904.081	1.4783	3.10855	1.02903	3.99099	0.563941	1.63624	0.0412803	1.99675	0.643		hypothetical protein	629	218	544	417	784	554	1082
FORC35_1798	1.2545	1.3341	0.7463	0	0.7439	0	0.592985	0	0.594898	0	-0.753932	-	-0.749285	-	1		hypothetical protein	2	1	1	0	1	0	1080
FORC35_1799	72.7606	54.6986	65.6749	72.3714	52.8195	75.0681	0.725935	1.3724	0.902616	1.32309	-0.462087	0.456696	-0.147815	0.403916	0.708		hypothetical protein	116	41	88	26	71	46	1078
FORC35_1801	0.6273	2.6682	4.4778	5.567	0.7439	8.1596	1.18588	3.05809	7.13821	2.08643	0.245953	1.61263	2.83556	1.06103	1		hypothetical protein	1	2	6	2	1	5	1076
FORC35_1802	5.6452	6.6706	10.4483	19.4846	2.2318	31.0064	0.395345	4.64822	1.85083	2.92097	-1.33882	2.21668	0.888172	1.54645	0.478		hypothetical protein	9	5	14	7	3	19	1074
FORC35_1803	4.3907	5.3365	2.9852	0	2.2318	0	0.508302	0	0.679892	0	-0.976243	-	-0.556623	-	0.682		hypothetical protein	7	4	4	0	3	0	1072
FORC35_1804	3064.1	901.86	994.825	1784.23	1477.46	1210.88	0.482184	1.34265	0.324671	1.97839	-1.05235	0.425082	-1.62295	0.984329	0.387	L	protein convertase	4885	676	1333	641	1986	742	1070
FORC35_1806	52.0615	22.6799	34.3301	16.7011	39.4287	32.6383	0.757349	1.43908	0.659414	0.736383	-0.400971	0.525152	-0.600743	-0.441471	0.765		hypothetical protein	83	17	46	6	53	20	1068
FORC35_1811	45.1618	40.0234	43.2857	44.5362	52.0756	44.0617	1.15309	1.1009	0.958458	1.11275	0.205505	0.138681	-0.0612125	0.154135	0.882		hypothetical protein	72	30	58	16	70	27	1058
FORC35_1812	90.3235	58.7009	84.3325	72.3714	68.4422	177.879	0.757745	3.03026	0.933672	1.23288	-0.400215	1.59944	-0.0990127	0.302037	0.751	L	single-stranded DNA-binding protein	144	44	113	26	92	109	1056
FORC35_1813	12.5449	13.3411	19.404	36.1857	17.1106	50.5894	1.36395	3.792	1.54676	2.71235	0.447789	1.92296	0.629253	1.43954	0.754		hypothetical protein	20	10	26	13	23	31	1054
FORC35_1814	62.0974	49.3622	92.5419	80.7219	66.9543	93.0192	1.07821	1.88442	1.49027	1.6353	0.108644	0.914122	0.575574	0.709553	0.94	L	hypothetical protein	99	37	124	29	90	57	1052
FORC35_1815	3.1362	4.0023	3.7315	0	1.4879	0	0.474428	0	1.18982	0	-1.07574	-	0.250738	-	0.617		hypothetical protein	5	3	5	0	2	0	1050
FORC35_1816	3.7635	0	4.4778	0	2.2318	1.6319	0.593012	-	1.1898	-	-0.753867	-	0.250715	-	0.682		hypothetical protein	6	0	6	0	3	1	1048
FORC35_1817	10.6632	1.3341	2.9852	5.567	4.4636	3.2638	0.418599	2.44644	0.279953	4.17285	-1.25636	1.29069	-1.83674	2.06103	0.448		hypothetical protein	17	1	4	2	6	2	1046
FORC35_1818	269.089	206.787	264.938	38.9692	136.14	39.166	0.505931	0.189402	0.984576	0.188451	-0.982987	-2.40047	-0.0224248	-2.40774	0.422		hypothetical protein	429	155	355	14	183	24	1044
FORC35_1819	3974.23	4082.38	3218.07	3304.03	4447.25	1909.34	1.11902	0.467703	0.809733	0.809339	0.162238	-1.09634	-0.304482	-0.305184	0.893		hypothetical protein	6336	3060	4312	1187	5978	1170	1042
FORC35_1821	6.2725	9.3388	4.4778	2.7835	2.9758	3.2638	0.47442	0.349488	0.713878	0.298058	-1.07576	-1.51668	-0.48625	-1.74634	0.538	K	regulatory protein	10	7	6	1	4	2	1040
FORC35_1822	0	0	0	0	0	0	-	-	-	-	-	-	-	-	1		hypothetical protein	0	0	0	0	0	0	1038
FORC35_1824	449.736	651.047	368.675	648.559	1124.09	269.266	2.49944	0.41359	0.819759	0.996179	1.32161	-1.27373	-0.286728	-0.00552343	0.281	L	integrase	717	488	494	233	1511	165	1036
FORC35_1825	2357.19	2705.58	2503.86	2711.14	1988.54	3005.99	0.843606	1.11103	1.06222	1.00206	-0.245358	0.151902	0.0870814	0.00296358	0.839	R	hypothetical protein	3758	2028	3355	974	2673	1842	1032
FORC35_1826	285.397	329.526	377.631	133.609	245.499	231.732	0.860202	0.703229	1.32318	0.405458	-0.217253	-0.507934	0.404004	-1.30238	0.858	S	hypothetical protein	455	247	506	48	330	142	1030
FORC35_1827	3.7635	5.3365	8.2094	2.7835	6.6954	3.2638	1.77904	0.611599	2.18132	0.521597	0.831095	-0.709341	1.1252	-0.938994	0.587		membrane protein	6	4	11	1	9	2	1028
FORC35_1828	1171.07	3083.13	1764.27	1333.3	2260.82	894.29	1.93056	0.290059	1.50654	0.432451	0.949022	-1.78558	0.591242	-1.20939	0.435	R	nucleoid-associated protein NdpA	1867	2311	2364	479	3039	548	1026
FORC35_1829	10.6632	57.3668	16.4187	25.0516	31.9893	9.7915	2.99997	0.170682	1.53975	0.436692	1.58495	-2.55061	0.622699	-1.19531	0.249		hypothetical protein	17	43	22	9	43	6	1024
FORC35_1830	904.49	6730.6	3909.15	4350.63	14315.6	642.975	15.8272	0.0955301	4.32194	0.646396	3.98434	-3.3879	2.11168	-0.629509	0.003	J	50S ribosomal protein L25	1442	5045	5238	1563	19243	394	1022
FORC35_1831	775.277	792.463	838.101	815.57	935.873	1028.11	1.20715	1.29736	1.08103	1.02916	0.2716	0.375575	0.112413	0.0414653	0.823	L	hypothetical protein	1236	594	1123	293	1258	630	1020
FORC35_1832	762.732	529.643	1134.38	311.754	755.096	1033	0.989989	1.95038	1.48727	0.588611	-0.0145162	0.963753	0.572662	-0.764613	0.991	J	16S rRNA pseudouridylate synthase	1216	397	1520	112	1015	633	1018
FORC35_1833	588.357	464.271	778.397	562.27	552.001	1018.32	0.938207	2.19336	1.323	1.21108	-0.0920214	1.13315	0.403813	0.276296	0.941	G	multidrug transporter	938	348	1043	202	742	624	1016
FORC35_1834	2115.08	206.787	197.025	851.755	331.052	2780.78	0.15652	13.4476	0.0931526	4.11899	-2.67558	3.74927	-3.42426	2.04229	0.037		hypothetical protein	3372	155	264	306	445	1704	1014
FORC35_1835	1680.39	1634.29	1567.24	2894.85	1508.7	1254.94	0.897828	0.767884	0.932663	1.77133	-0.15549	-0.38104	-0.100572	0.824829	0.898	R	microcin C ABC transporter ATP-binding protein YejF	2679	1225	2100	1040	2028	769	1012
FORC35_1836	370.075	325.523	513.458	495.466	339.979	318.224	0.918675	0.977575	1.38744	1.52206	-0.122374	-0.0327209	0.472427	0.606024	0.921	P	microcin C ABC transporter permease	590	244	688	178	457	195	1010
FORC35_1837	622.229	553.657	705.259	704.229	562.416	429.194	0.903874	0.775199	1.13344	1.27196	-0.145807	-0.367362	0.180708	0.347053	0.904	P	microcin C ABC transporter permease YejB	992	415	945	253	756	263	1008
FORC35_1838	2060.51	1451.51	1939.65	3078.57	2071.86	1759.2	1.00551	1.21198	0.941346	2.12094	0.0079312	0.277365	-0.0872032	1.0847	0.995	E	peptide ABC transporter substrate-binding protei n	3285	1088	2599	1106	2785	1078	1006
FORC35_1839	673.036	636.371	581.372	551.136	583.246	651.134	0.866591	1.0232	0.863806	0.86606	-0.206577	0.0330859	-0.211221	-0.207461	0.865	T	phage resistance protein	1073	477	779	198	784	399	1004
FORC35_1840	1889.89	1618.28	1643.36	578.971	861.479	502.63	0.455834	0.310596	0.869554	0.35777	-1.13342	-1.68689	-0.201653	-1.4829	0.353	M	lipoprotein spr	3013	1213	2202	208	1158	308	1002
FORC35_1841	285.397	198.783	180.606	50.1033	209.046	53.8532	0.732475	0.270915	0.632823	0.252051	-0.449149	-1.88409	-0.660125	-1.98821	0.713	I	membrane protein	455	149	242	18	281	33	1000
FORC35_1842	604.038	414.909	631.375	178.145	363.041	352.494	0.601023	0.849569	1.04526	0.429359	-0.734507	-0.235197	0.0638555	-1.21974	0.545	R	hypothetical protein	963	311	846	64	488	216	998
FORC35_1843	343.104	314.851	140.305	823.92	800.476	1073.8	2.33304	3.41051	0.40893	2.61686	1.22221	1.76999	-1.29007	1.38784	0.318	G	D-mannonate oxidoreductase	547	236	188	296	1076	658	996
FORC35_1844	268.462	907.196	681.377	192.062	929.921	207.253	3.46389	0.228455	2.53808	0.21171	1.79239	-2.13002	1.34374	-2.23984	0.149	J	elongation factor P	428	680	913	69	1250	127	994
FORC35_1845	11.9177	9.3388	15.6724	2.7835	14.8787	4.8958	1.24845	0.524243	1.31505	0.298058	0.320143	-0.931693	0.39512	-1.74634	0.819		hypothetical protein	19	7	21	1	20	3	992
FORC35_1846	5.018	12.007	14.9261	5.567	11.1591	16.3192	2.22381	1.35914	2.97451	0.463646	1.15304	0.442695	1.57265	-1.1089	0.448		hypothetical protein	8	9	20	2	15	10	990
FORC35_1847	77.1513	134.745	127.618	69.5879	97.4557	114.234	1.26318	0.847778	1.65413	0.51644	0.337056	-0.238242	0.726073	-0.953327	0.788	G	sugar transporter	123	101	171	25	131	70	988
FORC35_1848	0	1.3341	0.7463	2.7835	0.7439	0	-	0	-	2.08643	-	-	-	1.06103	1		hypothetical protein	0	1	1	1	1	0	986
FORC35_1850	64.6064	4334.53	39015.4	1903.92	5730.55	2901.55	88.6993	0.669403	603.893	0.439246	6.47085	-0.579054	9.23815	-1.1869	0	G	PTS fructose transporter subunit IIA	103	3249	52278	684	7703	1778	984
FORC35_1851	506.188	1614.28	23378	2121.04	2408.12	3743.61	4.75737	2.31907	46.1845	1.31393	2.25016	1.21354	5.52934	0.393883	0.074	G	1-phosphofructokinase	807	1210	31325	762	3237	2294	982
FORC35_1852	1548.04	1548.9	29544.7	4439.71	1481.18	9669.1	0.956806	6.24254	19.0852	2.86635	-0.0637018	2.64213	4.25438	1.51922	0.958	G	PTS fructose transporter subunit IIBC	2468	1161	39588	1595	1991	5925	980
FORC35_1853	85.3055	10.6729	14.9261	19.4846	17.8545	35.9021	0.209301	3.36386	0.174972	1.82561	-2.25635	1.75012	-2.5148	0.868382	0.084	G	pseudouridine kinase	136	8	20	7	24	22	978
FORC35_1854	163.084	45.3598	92.5419	36.1857	61.0028	102.811	0.374057	2.26656	0.567449	0.797748	-1.41867	1.1805	-0.817438	-0.325995	0.254	Q	pseudouridine-5'-phosphate glycosidase	260	34	124	13	82	63	976
FORC35_1855	297.942	208.121	223.892	150.31	177.801	243.155	0.596763	1.16833	0.75146	0.722221	-0.74477	0.224453	-0.412231	-0.469487	0.542	F	nucleoside permease	475	156	300	54	239	149	974
FORC35_1856	161.202	42.6916	41.0468	89.0725	31.2454	158.296	0.193827	3.70789	0.254629	2.08642	-2.36716	1.8906	-1.97353	1.06103	0.068	T	Crp/Fnr family transcriptional regulator	257	32	55	32	42	97	972
FORC35_1857	45.1618	28.0164	23.8818	36.1857	27.5257	29.3745	0.609491	1.04848	0.528805	1.29159	-0.714324	0.0682927	-0.919191	0.369148	0.577	F	ribonucleoside hydrolase	72	21	32	13	37	18	970
FORC35_1858	61.4702	56.0327	61.9434	61.2373	29.0135	76.7	0.471993	1.36884	1.0077	1.09289	-1.08316	0.452958	0.0110634	0.128142	0.403	F	nucleoside permease	98	42	83	22	39	47	968
FORC35_1859	835.492	1938.46	1345.59	1185.78	1666.42	553.219	1.99453	0.28539	1.61053	0.611709	0.996052	-1.80899	0.687539	-0.709082	0.413	G	carbohydrate kinase	1332	1453	1803	426	2240	339	966
FORC35_1860	1739.98	3360.63	2721.03	2324.23	2776.37	1245.15	1.59563	0.370512	1.56383	0.691607	0.674128	-1.43241	0.64508	-0.531975	0.577	L	apurinic endonuclease family protein	2774	2519	3646	835	3732	763	964
FORC35_1861	385.757	438.923	502.264	437.012	443.386	545.06	1.14939	1.24181	1.30202	0.995646	0.200873	0.312447	0.380754	-0.00629531	0.87	S	membrane protein	615	329	673	157	596	334	962
FORC35_1862	1548.67	1576.92	2056.07	2583.1	1792.89	2113.33	1.15769	1.34016	1.32764	1.63807	0.211254	0.422408	0.408859	0.711994	0.861	K	transcriptional regulator	2469	1182	2755	928	2410	1295	960
FORC35_1863	1035.58	1725.01	1327.68	1060.52	726.082	2062.74	0.701133	1.19579	1.28206	0.614791	-0.51224	0.257961	0.35846	-0.701832	0.672	E	lysine transporter	1651	1293	1779	381	976	1264	958
FORC35_1865	19147.3	88142.1	12116.3	1169.08	107298	675.613	5.60381	0.00766504	0.632792	0.0132635	2.48641	-7.02749	-0.660198	-6.23639	0.05	P	catecholate siderophore receptor CirA	30526	66068	16235	420	144230	414	956
FORC35_1866	1810.23	3516.72	2265.04	2613.72	3352.18	922.032	1.85179	0.262185	1.25124	0.743227	0.888923	-1.93134	0.323359	-0.428126	0.464	R	S-formylglutathione hydrolase	2886	2636	3035	939	4506	565	954
FORC35_1867	19029.4	10386.1	9366.14	3078.57	9907.75	1770.63	0.520655	0.170481	0.492193	0.296413	-0.941601	-2.55232	-1.0227	-1.75432	0.438	H	GTP cyclohydrolase I	30338	7785	12550	1106	13318	1085	952
FORC35_1868	1265.16	659.051	613.463	295.053	520.012	159.928	0.411026	0.242663	0.484891	0.447693	-1.2827	-2.04297	-1.04427	-1.15942	0.295	S	membrane protein	2017	494	822	106	699	98	950
FORC35_1869	164.339	152.089	132.842	6276.82	153.995	522.213	0.937059	3.43361	0.808346	41.2708	-0.0937888	1.77972	-0.306956	5.36705	0.939	K	transcriptional regulator	262	114	178	2255	207	320	948
FORC35_1870	334.95	385.558	167.919	9714.47	483.559	11128	1.44368	28.8621	0.501325	25.1958	0.529747	4.85111	-0.996181	4.65511	0.662	G	Galactose/methyl galactoside ABC transport system, D-galactose-binding periplasmic protein MglB	534	289	225	3490	650	6819	946
FORC35_1871	224.554	306.846	50.7488	904.642	313.197	1313.69	1.39475	4.28128	0.225998	2.9482	0.480008	2.09804	-2.14562	1.55983	0.696	P	D-ribose transporter ATP binding protein	358	230	68	325	421	805	944
FORC35_1872	74.0151	128.075	34.3301	86.289	162.922	345.966	2.2012	2.70128	0.463826	0.673739	1.13829	1.43364	-1.10835	-0.569738	0.358	G	branched-chain amino acid transport system / permease component family protein	118	96	46	31	219	212	942
FORC35_1873	90.3235	78.7126	104.483	489.899	107.127	1174.98	1.18604	14.9275	1.15676	6.22389	0.246147	3.8999	0.210092	2.63782	0.844	F	dihydropyrimidine dehydrogenase subunit B	144	59	140	176	144	720	940
FORC35_1874	224.554	145.418	135.081	2379.9	146.556	2912.97	0.652651	20.0317	0.601553	16.3659	-0.615616	4.32421	-0.733236	4.03262	0.617	E	dihydropyrimidine dehydrogenase subunit A	358	109	181	855	197	1785	938
FORC35_1875	79.6603	52.0304	47.0173	25.0516	63.2346	19.583	0.793803	0.376376	0.590222	0.48148	-0.333147	-1.40975	-0.760669	-1.05445	0.795		hypothetical protein	127	39	63	9	85	12	936
FORC35_1876	326.168	253.481	280.611	77.9384	342.211	168.087	1.04919	0.663115	0.860325	0.307472	0.0692696	-0.592669	-0.217046	-1.70147	0.955	S	hypothetical protein	520	190	376	28	460	103	934
FORC35_1877	654.218	629.701	959.003	3351.35	2794.23	3423.76	4.27109	5.43712	1.46588	5.32213	2.09461	2.44284	0.551763	2.412	0.094	F	cytidine deaminase	1043	472	1285	1204	3756	2098	932
FORC35_1878	557.622	446.928	718.692	829.487	640.53	1364.28	1.14868	3.05258	1.28885	1.85598	0.199977	1.61003	0.366086	0.892179	0.869	M	membrane protein	889	335	963	298	861	836	930
FORC35_1879	183.156	152.089	243.296	172.578	331.796	461.832	1.81155	3.0366	1.32835	1.13472	0.857223	1.60245	0.409637	0.182334	0.483	R	hypothetical protein	292	114	326	62	446	283	928
FORC35_1880	82.1693	112.065	130.603	77.9384	100.431	212.149	1.22225	1.89308	1.58944	0.695472	0.28954	0.920737	0.668522	-0.523935	0.817	J	tRNA-dihydrouridine synthase C	131	84	175	28	135	130	926
FORC35_1882	161.83	69.3738	76.8695	61.2373	55.0513	70.1724	0.340181	1.01151	0.475003	0.882715	-1.55563	0.0165128	-1.07399	-0.17998	0.216	M	multidrug resistance outer membrane protein MdtQ	258	52	103	22	74	43	924
FORC35_1883	1190.51	909.865	1940.39	1581.04	600.357	3081.06	0.504284	3.38628	1.62988	1.73766	-0.987692	1.7597	0.704765	0.797147	0.417	I	oxidoreductase	1898	682	2600	568	807	1888	922
FORC35_1884	556.995	414.909	755.261	634.641	386.103	1130.92	0.69319	2.7257	1.35596	1.52959	-0.528678	1.44663	0.439311	0.613147	0.663	S	inner membrane protein yohD	888	311	1012	228	519	693	920
FORC35_1885	1587.56	2532.14	2944.92	8523.12	1189.56	17980.4	0.749297	7.10088	1.855	3.36597	-0.41639	2.828	0.891417	1.75102	0.73		inner membrane protein yohC	2531	1898	3946	3062	1599	11018	918
FORC35_1886	1100.19	991.245	1135.88	384.125	944.056	812.694	0.858084	0.819872	1.03244	0.387518	-0.220809	-0.28653	0.0460533	-1.36767	0.855	M	D-alanyl-D-alanine endopeptidase	1754	743	1522	138	1269	498	916
FORC35_1887	5611.35	9095.98	6023.43	11910.7	10913.6	2890.12	1.94491	0.317736	1.07344	1.30944	0.959702	-1.6541	0.102238	0.388953	0.429	C	D-lactate dehydrogenase	8946	6818	8071	4279	14670	1771	914
FORC35_1888	1726.18	1709	1546.35	1834.34	1888.86	1135.81	1.09424	0.664608	0.895818	1.07334	0.129927	-0.589425	-0.158723	0.102107	0.914	G	beta-D-glucoside glucohydrolase	2752	1281	2072	659	2539	696	912
FORC35_1889	4592.07	2558.83	3282.25	2919.91	1630.71	4708.08	0.355114	1.83994	0.714765	1.14111	-1.49365	0.879655	-0.484459	0.19044	0.224	E	osmoprotectant uptake system substrate-binding p rotein	7321	1918	4398	1049	2192	2885	910
FORC35_1890	1117.75	755.107	732.126	1455.78	644.249	729.466	0.576379	0.966043	0.654998	1.92791	-0.794911	-0.0498407	-0.610439	0.947036	0.513	E	osmoprotectant uptake system permease	1782	566	981	523	866	447	908
FORC35_1891	366.939	348.203	245.535	924.127	277.488	407.979	0.756225	1.17167	0.669142	2.65399	-0.403113	0.228565	-0.579616	1.40816	0.741	E	ATP-binding protein	585	261	329	332	373	250	906
FORC35_1892	514.342	520.304	300.761	1188.56	522.988	518.949	1.01681	0.997397	0.584749	2.28436	0.0240479	-0.00376065	-0.77411	1.19179	0.985	E	osmoprotectant uptake system permease	820	390	403	427	703	318	904
FORC35_1894	258.426	225.465	183.591	281.135	273.025	135.449	1.05649	0.600754	0.710422	1.24691	0.079283	-0.735154	-0.493252	0.31836	0.949	K	HTH-type transcriptional repressor YcgE	412	169	246	101	367	83	902
FORC35_1895	4040.1	3795.55	2827.01	4286.61	3614.79	3497.2	0.894729	0.921394	0.699737	1.12938	-0.160478	-0.11811	-0.515115	0.175529	0.894	L	integrase	6441	2845	3788	1540	4859	2143	900
FORC35_1897	10.036	5.3365	3.7315	8.3505	4.4636	6.5277	0.444759	1.22322	0.371811	1.56479	-1.1689	0.290681	-1.42736	0.645969	0.492		hypothetical protein	16	4	5	3	6	4	898
FORC35_1898	55.1977	29.3505	22.3892	27.8351	35.709	29.3745	0.646929	1.00082	0.405618	0.948369	-0.62832	0.00117921	-1.30181	-0.0764798	0.618		hypothetical protein	88	22	30	10	48	18	896
FORC35_1899	69.6244	36.021	39.5542	27.8351	37.1968	9.7915	0.534249	0.271828	0.568108	0.772746	-0.904414	-1.87924	-0.815762	-0.371933	0.469		hypothetical protein	111	27	53	10	50	6	894
FORC35_1900	1292.13	597.682	526.145	598.456	675.495	166.455	0.522777	0.278501	0.407193	1.00129	-0.935733	-1.84424	-1.29622	0.0018654	0.442	O	putative serine protease	2060	448	705	215	908	102	892
FORC35_1902	211.382	105.395	81.3473	91.856	84.8088	42.4298	0.401211	0.402579	0.384835	0.871541	-1.31757	-1.31266	-1.37769	-0.198359	0.288		hypothetical protein	337	79	109	33	114	26	890
FORC35_1903	18.1902	17.3435	11.9409	5.567	6.6954	8.1596	0.368077	0.47047	0.656447	0.320985	-1.44192	-1.08782	-0.60725	-1.63942	0.316		hypothetical protein	29	13	16	2	9	5	888
FORC35_1904	25.0899	8.0047	9.702	5.567	8.1833	1.6319	0.326159	0.203868	0.386689	0.695466	-1.61635	-2.29429	-1.37075	-0.523947	0.24		hypothetical protein	40	6	13	2	11	1	886
FORC35_1905	1208.7	401.568	417.185	601.239	363.785	466.728	0.300971	1.16226	0.34515	1.49723	-1.7323	0.216938	-1.5347	0.582295	0.163		hypothetical protein	1927	301	559	216	489	286	884
FORC35_1906	134.231	89.3855	55.9729	94.6395	51.3316	60.3809	0.382413	0.675511	0.41699	1.05878	-1.3868	-0.565949	-1.26192	0.0824016	0.266	K	DNA-binding protein	214	67	75	34	69	37	882
FORC35_1907	2641.34	3131.16	3253.15	5021.46	2766.7	7568.82	1.04746	2.41726	1.23163	1.60371	0.0668992	1.27337	0.300568	0.681409	0.956	K	repressor	4211	2347	4359	1804	3719	4638	880
FORC35_1909	38.2621	32.0187	44.7783	25.0516	21.5742	52.2213	0.563853	1.63096	1.1703	0.782405	-0.826609	0.705724	0.226884	-0.354012	0.538		hypothetical protein	61	24	60	9	29	32	878
FORC35_1911	177.511	170.766	142.544	364.64	137.628	172.983	0.775324	1.01298	0.803018	2.13532	-0.36713	0.018607	-0.316495	1.09445	0.764		hypothetical protein	283	128	191	131	185	106	876
FORC35_1914	1.2545	2.6682	2.9852	2.7835	1.4879	3.2638	1.18605	1.22322	2.37959	1.04321	0.246165	0.290686	1.25072	0.0610333	1		hypothetical protein	2	2	4	1	2	2	874
FORC35_1915	188.801	228.133	164.187	161.444	104.895	220.309	0.555585	0.965702	0.86963	0.707673	-0.847921	-0.0503506	-0.201526	-0.498844	0.494	S	DNA-binding protein	301	171	220	58	141	135	872
FORC35_1916	190.683	234.804	111.946	128.042	90.7603	218.677	0.475975	0.931317	0.587078	0.545314	-1.07104	-0.102656	-0.768376	-0.874841	0.387	K	hypothetical protein	304	176	150	46	122	134	870
FORC35_1917	623.483	773.785	678.392	200.413	365.273	314.96	0.585859	0.407038	1.08807	0.259003	-0.771376	-1.29677	0.121768	-1.94896	0.526	S	peptidase	994	580	909	72	491	193	868
FORC35_1918	23.2081	24.014	14.9261	13.9176	14.8787	13.0553	0.641099	0.543654	0.643142	0.579562	-0.64138	-0.87924	-0.636791	-0.786965	0.652		hypothetical protein	37	18	20	5	20	8	866
FORC35_1919	430.291	470.942	387.333	345.156	397.262	398.187	0.923241	0.845513	0.900164	0.732906	-0.115221	-0.242101	-0.15174	-0.4483	0.926		hypothetical protein	686	353	519	124	534	244	864
FORC35_1920	664.881	661.72	600.03	684.745	529.683	822.485	0.796658	1.24295	0.902461	1.0348	-0.327968	0.31377	-0.148063	0.0493458	0.787	L	ATPase AAA	1060	496	804	246	712	504	862
FORC35_1921	328.677	330.86	341.062	311.754	296.831	373.709	0.903107	1.12951	1.03768	0.942253	-0.147031	0.175694	0.0533614	-0.0858138	0.906	L	helicase	524	248	457	112	399	229	860
FORC35_1922	6.2725	4.0023	8.2094	5.567	4.4636	6.5277	0.711614	1.63099	1.30879	1.39095	-0.490833	0.705745	0.388236	0.476071	0.899		hypothetical protein	10	3	11	2	6	4	858
FORC35_1923	14.4267	10.6729	29.1059	16.7011	16.3666	11.4234	1.13447	1.07032	2.0175	1.56481	0.182013	0.0980399	1.01257	0.645991	0.92	K	antitermination protein	23	8	39	6	22	7	856
FORC35_1924	29.4806	9.3388	14.1798	16.7011	13.3909	11.4234	0.454228	1.22322	0.480987	1.78836	-1.13851	0.290683	-1.05593	0.838634	0.411		hypothetical protein	47	7	19	6	18	7	854
FORC35_1925	2073.05	193.446	220.16	180.928	165.898	515.685	0.080026	2.66578	0.106201	0.93529	-3.64339	1.41456	-3.23513	-0.0965143	0.006	V	N-6 DNA Methylase	3305	145	295	65	223	316	852
FORC35_1927	294.179	659.051	414.2	974.23	549.769	672.349	1.86883	1.02018	1.40799	1.47823	0.902134	0.0288197	0.493633	0.563871	0.46	L	RNA-directed DNA polymerase	469	494	555	350	739	412	850
FORC35_1928	25.7171	30.6846	20.1503	16.7011	8.1833	27.7426	0.318205	0.904121	0.783537	0.544283	-1.65197	-0.145412	-0.351927	-0.877572	0.229		hypothetical protein	41	23	27	6	11	17	848
FORC35_1946	26.9716	44.0257	26.867	58.4538	26.7817	40.7979	0.992959	0.926684	0.996122	1.32772	-0.0101936	-0.109851	-0.00560587	0.408951	1		hypothetical protein	43	33	36	21	36	25	802
FORC35_1955	1109.6	583.007	452.261	609.59	623.419	672.349	0.561842	1.15324	0.40759	1.0456	-0.831765	0.205698	-1.29481	0.0643253	0.494	S	tail protein	1769	437	606	219	838	412	1936
FORC35_1956	580.203	236.138	171.65	169.794	246.243	186.038	0.424408	0.787838	0.295845	0.719048	-1.23647	-0.344029	-1.75709	-0.475841	0.315		hypothetical protein	925	177	230	61	331	114	1934
FORC35_1959	1.8817	6.6706	5.2241	8.3505	7.4394	6.5277	3.95355	0.978578	2.77627	1.25184	1.98315	-0.0312418	1.47315	0.324046	0.296		hypothetical protein	3	5	7	3	10	4	760
FORC35_1960	127.958	168.098	229.862	155.877	104.895	195.83	0.81976	1.16497	1.79638	0.927297	-0.286726	0.220298	0.845095	-0.108897	0.823		hypothetical protein	204	126	308	56	141	120	772
FORC35_1961	52.6887	80.0467	58.2118	72.3714	53.5635	71.8043	1.0166	0.89703	1.10483	0.904115	0.0237566	-0.156772	0.143818	-0.145422	1	R	tail protein	84	60	78	26	72	44	770
FORC35_1962	11.2904	18.6776	15.6724	11.1341	17.1106	13.0553	1.5155	0.698982	1.38812	0.59612	0.599794	-0.516673	0.47313	-0.746324	0.708	R	tail protein	18	14	21	4	23	8	10156
FORC35_1966	267.834	406.904	296.283	409.177	310.222	331.279	1.15826	0.814145	1.10622	1.00558	0.211959	-0.296643	0.145637	0.00803447	0.863		hypothetical protein	427	305	397	147	417	203	744
FORC35_1967	146.776	81.3808	147.022	102.99	36.4529	262.738	0.248358	3.22851	1.00168	1.26553	-2.00951	1.69087	0.00242088	0.339744	0.113		DNA-damage-inducible protein DinI	234	61	197	37	49	161	742
FORC35_1968	164.966	554.991	264.192	1043.82	594.406	417.77	3.6032	0.752752	1.6015	1.88078	1.84928	-0.409753	0.67942	0.911335	0.138	T	histidine kinase-, DNA gyrase B-, and HSP90-like ATPase family protein	263	416	354	375	799	256	740
FORC35_1969	131.095	264.154	176.128	336.805	456.777	181.143	3.48433	0.685746	1.34352	1.27503	1.80088	-0.544254	0.426017	0.350534	0.149	T	transcriptional regulator	209	198	236	121	614	111	738
FORC35_1970	319.269	389.561	401.512	108.557	444.874	146.872	1.39342	0.37702	1.2576	0.278665	0.478627	-1.40729	0.330674	-1.84339	0.694	S	hypothetical protein	509	292	538	39	598	90	736
FORC35_1971	50.1797	25.3481	39.5542	22.2681	35.709	29.3745	0.711622	1.15884	0.788251	0.878492	-0.490816	0.212687	-0.343273	-0.186899	0.706	S	hypothetical protein	80	19	53	8	48	18	734
FORC35_1972	233.336	185.442	239.564	139.176	220.205	230.1	0.943727	1.24082	1.02669	0.75051	-0.0835585	0.311297	0.0380041	-0.414058	0.946		hypothetical protein	372	139	321	50	296	141	732
FORC35_1973	54.5705	57.3668	87.3178	91.856	58.0271	83.2277	1.06334	1.4508	1.60009	1.6012	0.0886056	0.536848	0.678155	0.679158	0.954	R	hypothetical protein	87	43	117	33	78	51	730
FORC35_1974	196.328	160.094	225.384	150.31	175.569	208.885	0.894263	1.30477	1.148	0.938888	-0.161228	0.383796	0.19912	-0.0909757	0.899		hypothetical protein	313	120	302	54	236	128	728
FORC35_1975	53.316	40.0234	41.0468	13.9176	31.9893	14.6872	0.599994	0.366965	0.769878	0.347737	-0.736979	-1.44628	-0.377299	-1.52393	0.569	R	hypothetical protein	85	30	55	5	43	9	726
FORC35_1977	213.264	173.435	196.278	66.8043	156.227	274.162	0.732551	1.58078	0.920355	0.385184	-0.448999	0.660636	-0.119738	-1.37638	0.716		hypothetical protein	340	130	263	24	210	168	724
FORC35_1978	112.904	93.3879	117.916	44.5362	66.2104	78.332	0.586429	0.838781	1.04439	0.476895	-0.769972	-0.253634	0.0626615	-1.06826	0.538		hypothetical protein	180	70	158	16	89	48	722
FORC35_1979	7.527	6.6706	2.9852	13.9176	10.4151	3.2638	1.3837	0.489281	0.396599	2.08641	0.46853	-1.03126	-1.33425	1.06102	0.803		regulator	12	5	4	5	14	2	720
FORC35_1980	574.558	349.537	314.941	261.65	348.163	318.224	0.605966	0.910413	0.548145	0.748562	-0.722691	-0.135406	-0.867371	-0.417806	0.553	S	MolR family transcriptional regulator	916	262	422	94	468	195	718
FORC35_1981	4748.88	10620.9	5304.74	9630.96	12177.5	3022.31	2.56429	0.284563	1.11705	0.906796	1.35856	-1.81318	0.159693	-0.14115	0.267	J	methionyl-tRNA synthetase	7571	7961	7108	3460	16369	1852	716
FORC35_1982	4983.47	3184.53	5385.34	4481.46	4766.4	5029.56	0.956442	1.57938	1.08064	1.40726	-0.0642509	0.659355	0.111886	0.49289	0.958	D	ATPase	7945	2387	7216	1610	6407	3082	714
FORC35_1984	17.5629	17.3435	15.6724	386.909	65.4664	6.5277	3.72754	0.376377	0.892358	22.3086	1.89822	-1.40975	-0.164305	4.47953	0.148	N	Putative fimbrial-like protein	28	13	21	139	88	4	712
FORC35_1985	8.1542	2.6682	11.9409	22.2681	14.8787	3.2638	1.82467	1.22322	1.46439	8.34574	0.867633	0.290686	0.550296	3.06104	0.554	N	fimbrial assembly chaperone protein StcB	13	2	16	8	20	2	710
FORC35_1986	645.437	180.105	203.741	178.145	172.593	334.543	0.267406	1.85749	0.315664	0.989116	-1.9029	0.893351	-1.66354	-0.0157879	0.128	M	fimbrial outer membrane usher protein	1029	135	273	64	232	205	708
FORC35_1987	158.693	37.3551	36.569	30.6187	49.0998	32.6383	0.3094	0.873731	0.230438	0.819666	-1.69245	-0.194739	-2.11755	-0.286892	0.18		fimbrial protein	253	28	49	11	66	20	706
FORC35_1988	1521.7	961.895	916.463	286.702	754.352	514.053	0.49573	0.534417	0.602263	0.29806	-1.01237	-0.903961	-0.731535	-1.74633	0.406	S	hypothetical protein	2426	721	1228	103	1014	315	704
FORC35_1989	272.852	229.467	167.173	111.341	185.984	151.768	0.68163	0.661394	0.612685	0.485213	-0.55294	-0.596419	-0.706783	-1.04331	0.651	P	nickel/cobalt efflux system rcnA	435	172	224	40	250	93	702
FORC35_1990	207.619	96.0561	60.4508	94.6395	84.0649	107.706	0.404901	1.12129	0.291163	0.985252	-1.30436	0.165155	-1.7801	-0.0214348	0.292	S	transcriptional regulator	331	72	81	34	113	66	700
FORC35_1991	49.5525	1636.96	60.4508	1277.63	188.216	406.347	3.79831	0.248233	1.21993	0.780493	1.92536	-2.01023	0.286804	-0.357542	0.127	H	hydroxyethylthiazole kinase	79	1227	81	459	253	249	698
FORC35_1992	153.048	2569.5	148.515	2869.8	414.373	616.864	2.70747	0.240072	0.970379	1.11687	1.43694	-2.05846	-0.0433794	0.159464	0.244	H	bifunctional hydroxy-methylpyrimidine kinase/ hydroxy-phosphomethylpyrimidine kinase	244	1926	199	1031	557	378	696
FORC35_1995	218.282	185.442	155.232	108.557	239.548	190.934	1.09742	1.02962	0.711152	0.585398	0.134121	0.0421099	-0.49177	-0.772511	0.915	K	GntR family transcriptional regulator	348	139	208	39	322	117	690
FORC35_1996	200.719	282.832	132.096	203.197	337.747	171.351	1.68269	0.605841	0.658115	0.718436	0.750768	-0.722989	-0.603589	-0.477068	0.54	G	kinase	320	212	177	73	454	105	688
FORC35_1997	176.256	256.149	147.768	180.928	333.284	179.511	1.8909	0.700804	0.838373	0.706339	0.919076	-0.512916	-0.254336	-0.501567	0.452	O	poly(ADP-ribose) glycohydrolase	281	192	198	65	448	110	686
FORC35_1998	118.55	145.418	97.766	125.258	91.5042	217.045	0.771864	1.49256	0.824684	0.861365	-0.373581	0.577785	-0.278086	-0.215303	0.763	G	putative nucleoside transporter yegT	189	109	131	45	123	133	684
FORC35_1999	50196.7	34178.6	51964.5	104604	16653.8	39113.8	0.33177	1.14439	1.03522	3.06052	-1.59174	0.194582	0.0499351	1.61378	0.196	G	fructose-bisphosphate aldolase	80027	25619	69629	37580	22386	23968	682
FORC35_2000	15.0539	16.0094	26.867	100.207	18.5984	168.087	1.23545	10.4993	1.78472	6.25923	0.305041	3.39222	0.835698	2.64598	0.854	G	fructose-bisphosphate aldolase	24	12	36	36	25	103	680
FORC35_2001	69.6244	29.3505	50.0025	108.557	58.0271	151.768	0.833431	5.17089	0.718175	3.69865	-0.262866	2.37041	-0.477593	1.887	0.84	G	tagatose-bisphosphate aldolase	111	22	67	39	78	93	678
FORC35_2002	33.8713	8.0047	7.4631	8.3505	2.9758	16.3192	0.0878561	2.0387	0.220337	1.0432	-3.50871	1.02765	-2.18222	0.0610152	0.017	G	PTS galactitol transporter subunit IIA	54	6	10	3	4	10	676
FORC35_2003	21.9536	0	5.9704	0	1.4879	4.8958	0.0677748	-	0.271955	-	-3.88311	-	-1.87856	-	0.018	G	PTS galactitol transporter subunit IIB	35	0	8	0	2	3	674
FORC35_2004	504.934	113.4	108.961	94.6395	104.151	285.585	0.206267	2.5184	0.215792	0.834567	-2.27741	1.33251	-2.21229	-0.2609	0.073	G	PTS galactitol transporter subunit IIC	805	85	146	34	140	175	672
FORC35_2005	459.145	62.7033	83.5862	38.9692	69.9301	104.443	0.152305	1.66566	0.182048	0.621486	-2.71496	0.736097	-2.45761	-0.686207	0.035	C	galactitol-1-phosphate 5-dehydrogenase	732	47	112	14	94	64	670
FORC35_2006	586.476	488.285	559.729	208.764	669.543	319.856	1.14164	0.655059	0.954395	0.427544	0.191106	-0.610303	-0.0673421	-1.22585	0.876	K	galactitol utilization operon repressor	935	366	750	75	900	196	668
FORC35_2007	2187.84	749.771	1703.07	915.776	810.891	3965.55	0.370636	5.28902	0.778426	1.22141	-1.43192	2.403	-0.361368	0.288545	0.244	I	lipid kinase	3488	562	2282	329	1090	2430	666
FORC35_2008	131.095	30.6846	49.2562	52.8868	34.965	40.7979	0.266716	1.32959	0.37573	1.72356	-1.90662	0.41098	-1.41223	0.785393	0.133		hypothetical protein	209	23	66	19	47	25	664
FORC35_2009	1039.35	1290.09	731.38	247.733	660.616	536.9	0.635606	0.416174	0.703691	0.192028	-0.653795	-1.26474	-0.506986	-2.38061	0.59	O	protease	1657	967	980	89	888	329	662
FORC35_2010	430.291	202.785	244.042	192.062	168.13	545.06	0.390735	2.68787	0.567155	0.947123	-1.35574	1.42646	-0.818184	-0.0783758	0.271	S	plasmid stabilization protein ParE	686	152	327	69	226	334	660
FORC35_2011	787.195	321.521	385.094	208.764	360.065	851.86	0.457403	2.64947	0.489198	0.6493	-1.12846	1.4057	-1.03151	-0.623043	0.356	K	CopG family transcripitonal regulator	1255	241	516	75	484	522	658
FORC35_2012	12094.6	9349.46	14844	32330.5	3689.18	60026.7	0.305028	6.42035	1.22733	3.45801	-1.71299	2.68265	0.295522	1.78994	0.166	S	hypothetical protein	19282	7008	19890	11615	4959	36783	656
FORC35_2013	6.8997	1.3341	11.1946	0	3.7197	4.8958	0.53911	3.66974	1.62248	0	-0.891347	1.87568	0.698197	-	0.587		transcriptional regulator	11	1	15	0	5	3	654
FORC35_2014	977.878	749.771	961.988	687.528	815.355	987.309	0.833801	1.31681	0.983751	0.916984	-0.262226	0.397052	-0.023635	-0.125031	0.829	T	transcriptional regulator	1559	562	1289	247	1096	605	652
FORC35_2015	478.589	583.007	704.513	971.447	412.885	864.915	0.862713	1.48354	1.47206	1.66627	-0.213048	0.569045	0.557837	0.736621	0.86	T	signal transduction histidine-protein kinase Bae S	763	437	944	349	555	530	650
FORC35_2016	316.76	370.883	470.173	626.291	266.329	706.619	0.840793	1.90523	1.48432	1.68865	-0.250177	0.929968	0.569802	0.755868	0.838	G	drug	505	278	630	225	358	433	648
FORC35_2017	610.311	888.519	909.746	1784.23	811.635	946.511	1.32987	1.06527	1.49063	2.0081	0.411287	0.0912171	0.57592	1.00583	0.734	P	multidrug transporter	973	666	1219	641	1091	580	646
FORC35_2018	706.907	895.189	749.291	1555.98	741.705	1041.16	1.04923	1.16306	1.05996	1.73816	0.0693251	0.21793	0.0840053	0.797563	0.955	P	multidrug resistance protein MdtB	1127	671	1004	559	997	638	644
FORC35_2019	526.887	426.916	608.239	448.146	325.1	814.326	0.617021	1.90746	1.1544	1.04973	-0.696609	0.931654	0.207144	0.0700163	0.567	M	multidrug transporter	840	320	815	161	437	499	642
FORC35_2020	13.7994	9.3388	17.9113	13.9176	6.6954	11.4234	0.485195	1.22322	1.29798	1.4903	-1.04336	0.290683	0.376265	0.575601	0.505	R	hypothetical protein	22	7	24	5	9	7	640
FORC35_2021	62.7247	13.3411	38.8079	5.567	14.8787	19.583	0.237206	1.46787	0.618702	0.417282	-2.07579	0.553724	-0.692683	-1.26091	0.117		hypothetical protein	100	10	52	2	20	12	638
FORC35_2022	230.827	38.6893	41.0468	44.5362	50.5877	39.166	0.219159	1.01232	0.177825	1.15112	-2.18995	0.0176672	-2.49147	0.203044	0.085	S	hypothetical protein	368	29	55	16	68	24	636
FORC35_2023	532.532	286.834	269.416	205.98	281.208	269.266	0.528058	0.938752	0.505915	0.718116	-0.921231	-0.0911839	-0.983032	-0.477712	0.45	R	hypothetical protein	849	215	361	74	378	165	634
FORC35_2025	541.314	348.203	552.266	559.486	373.456	786.583	0.689907	2.25898	1.02023	1.60678	-0.535526	1.17567	0.0288981	0.684173	0.66	L	3-methyl-adenine DNA glycosylase	863	261	740	201	502	482	630
FORC35_2026	3694.48	2629.54	1596.35	7239.92	2504.84	8443.53	0.677994	3.21104	0.43209	2.75331	-0.560657	1.68304	-1.2106	1.46117	0.643	T	diguanylate cyclase	5890	1971	2139	2601	3367	5174	628
FORC35_2027	1071.96	757.776	885.865	239.382	375.688	598.913	0.350467	0.790357	0.826394	0.315901	-1.51265	-0.339424	-0.275099	-1.66245	0.22	F	Uridine/cytidine kinase	1709	568	1187	86	505	367	626
FORC35_2028	2112.57	1332.78	1323.2	885.158	1316.02	739.258	0.62295	0.554674	0.626347	0.664145	-0.682811	-0.850287	-0.674966	-0.59043	0.573	F	deoxycytidine triphosphate deaminase	3368	999	1773	318	1769	453	624
FORC35_2029	3622.98	3479.36	2182.2	3337.43	2879.78	2145.97	0.794866	0.61677	0.602322	0.959208	-0.331217	-0.697195	-0.731394	-0.0600846	0.784	M	assembly protein	5776	2608	2924	1199	3871	1315	622
FORC35_2030	4664.21	2353.37	2679.24	3546.2	3222.73	3015.78	0.69095	1.28147	0.574425	1.50686	-0.533346	0.357801	-0.799809	0.591542	0.659	P	membrane protein	7436	1764	3590	1274	4332	1848	620
FORC35_2032	127.958	22.6799	26.867	22.2681	17.8545	19.583	0.139534	0.863452	0.209967	0.981843	-2.84131	-0.211812	-2.25177	-0.0264358	0.032	M	lipoprotein required for capsular polysaccharide translocation through the outer membrane	204	17	36	8	24	12	618
FORC35_2033	35.1258	6.6706	9.702	2.7835	2.9758	8.1596	0.0847184	1.22322	0.276207	0.417279	-3.56118	0.290682	-1.85618	-1.26092	0.016	T	protein-tyrosine phosphatase	56	5	13	1	4	5	616
FORC35_2034	307.351	146.752	161.202	94.6395	95.2239	215.413	0.309821	1.46787	0.524488	0.644893	-1.69049	0.553722	-0.931017	-0.632869	0.174	M	tyrosine kinase	490	110	216	34	128	132	614
FORC35_2035	164.339	73.3762	85.0788	89.0725	61.0028	104.443	0.371202	1.42339	0.517704	1.21392	-1.42972	0.509326	-0.9498	0.279668	0.25	M	glycosyl transferase	262	55	114	32	82	64	612
FORC35_2036	65.2337	53.3645	46.271	47.3197	35.709	66.9085	0.547401	1.2538	0.709311	0.886726	-0.86933	0.326309	-0.495509	-0.173439	0.486	E	acyl transferase	104	40	62	17	48	41	610
FORC35_2037	122.94	54.6986	76.1232	50.1033	49.8438	73.4362	0.405431	1.34256	0.619188	0.915989	-1.30247	0.424987	-0.69155	-0.126598	0.298	M	glycosyl transferase	196	41	102	18	67	45	608
FORC35_2038	140.503	26.6822	41.7931	33.4022	23.806	48.9575	0.169434	1.83484	0.297453	1.25185	-2.56121	0.875652	-1.74927	0.324066	0.05		putative colanic acid polymerase WcaD	224	20	56	12	32	30	606
FORC35_2039	127.331	24.014	11.9409	8.3505	7.4394	13.0553	0.0584256	0.543654	0.0937783	0.347735	-4.09725	-0.87924	-3.4146	-1.52394	0.004	M	glycosyl transferase	203	18	16	3	10	8	604
FORC35_2040	48.9252	2.6682	8.9557	0	5.2076	1.6319	0.10644	0.611611	0.183049	0	-3.23189	-0.709314	-2.4497	-	0.026	R	acyl transferase	78	2	12	0	7	1	602
FORC35_2041	463.535	104.061	97.0197	61.2373	107.127	57.117	0.231108	0.548881	0.209304	0.588476	-2.11336	-0.865435	-2.25633	-0.764944	0.094	M	GDP-mannose 4,6-dehydratase	739	78	130	22	144	35	600
FORC35_2042	239.608	56.0327	50.7488	52.8868	53.5635	37.5341	0.223546	0.669861	0.211799	0.943856	-2.16136	-0.578067	-2.23923	-0.0833613	0.088	M	GDP-mannose 4,6-dehydratase	382	42	68	19	72	23	598
FORC35_2043	57.7067	21.3458	9.702	11.1341	15.6227	11.4234	0.270726	0.535159	0.168126	0.521606	-1.8851	-0.90196	-2.57238	-0.938967	0.15	F	GDP-mannose mannosyl hydrolase NudD	92	16	13	4	21	7	596
FORC35_2044	118.55	52.0304	55.9729	50.1033	39.4287	76.7	0.332592	1.47414	0.472148	0.962962	-1.58817	0.559872	-1.08269	-0.0544492	0.209	M	glycosyl transferase	189	39	75	18	53	47	594
FORC35_2045	143.639	69.3738	91.0493	102.99	62.4907	102.811	0.435052	1.48198	0.633874	1.48457	-1.20074	0.567528	-0.657733	0.570041	0.339	M	mannose-1-phosphate guanyltransferase	229	52	122	37	84	63	592
FORC35_2047	201.346	68.0397	64.9286	30.6187	46.868	27.7426	0.232773	0.407741	0.322472	0.450012	-2.103	-1.29427	-1.63275	-1.15196	0.099	G	phosphomannomutase	321	51	87	11	63	17	590
FORC35_2048	72.1334	18.6776	45.5246	33.4022	31.2454	31.0064	0.433161	1.66008	0.631117	1.78836	-1.20702	0.731257	-0.664021	0.838634	0.343	M	UDP-glucose lipid carrier transferase	115	14	61	12	42	19	588
FORC35_2049	46.4163	30.6846	56.7192	52.8868	31.2454	44.0617	0.673156	1.43595	1.22197	1.72356	-0.570988	0.52201	0.289206	0.785393	0.665	M	lipopolysaccharide biosynthesis protein wzxC	74	23	76	19	42	27	586
FORC35_2050	106.005	76.0444	73.138	75.1549	49.0998	88.1234	0.463185	1.15884	0.689951	0.988303	-1.11034	0.212683	-0.535435	-0.0169748	0.377	M	colanic acid biosynthesis protein	169	57	98	27	66	54	584
FORC35_2051	153.048	152.089	133.589	167.011	103.407	254.579	0.675651	1.67388	0.872854	1.09811	-0.565649	0.743198	-0.196188	0.135028	0.645	M	colanic acid biosynthesis glycosyltransferase Wc aL	244	114	179	60	139	156	582
FORC35_2052	440.327	328.192	320.911	325.671	255.914	489.575	0.581191	1.49173	0.728802	0.99232	-0.782915	0.576991	-0.456401	-0.0111222	0.521	J	colanic acid biosynthesis protein WcaM	702	246	430	117	344	300	580
FORC35_2053	8749.46	6106.23	9301.95	4556.61	4962.8	10113	0.567212	1.65617	1.06315	0.746223	-0.818039	0.727854	0.0883391	-0.42232	0.5	M	UTP-glucose-1-phosphate uridylyltransferase	13949	4577	12464	1637	6671	6197	578
FORC35_2054	2004.05	3848.91	1611.27	2892.07	2277.93	1289.21	1.13666	0.334955	0.804008	0.751399	0.184806	-1.57796	-0.314719	-0.412348	0.878	M	dTDP-glucose 4,6-dehydratase 1	3195	2885	2159	1039	3062	790	576
FORC35_2055	1531.74	3516.72	1228.42	2933.82	3159.5	907.345	2.06269	0.258009	0.801978	0.83425	1.04453	-1.95451	-0.318365	-0.261448	0.391	M	dTDP-4-dehydrorhamnose reductase	2442	2636	1646	1054	4247	556	574
FORC35_2056	1280.84	3483.37	1336.63	2950.53	4052.97	618.496	3.16431	0.177557	1.04356	0.847033	1.66189	-2.49365	0.061516	-0.239511	0.178	M	glucose-1-phosphate thymidylyltransferase	2042	2611	1791	1060	5448	379	572
FORC35_2057	797.858	2198.62	1071.69	2293.62	2593.36	401.451	3.25041	0.182593	1.34322	1.04321	1.70062	-2.4533	0.425691	0.0610275	0.169	M	dTDP-4-dehydrorhamnose 3,5-epimerase	1272	1648	1436	824	3486	246	570
FORC35_2058	1806.47	4517.3	2252.35	4041.66	4902.54	760.473	2.71388	0.168347	1.24682	0.894707	1.44036	-2.57049	0.318258	-0.160513	0.241	M	hypothetical protein	2880	3386	3018	1452	6590	466	568
FORC35_2059	1125.91	2877.68	1703.07	2544.13	2713.88	502.63	2.41039	0.174665	1.51262	0.884091	1.26927	-2.51734	0.597049	-0.177733	0.299	M	hypothetical protein	1795	2157	2282	914	3648	308	566
FORC35_2060	1062.56	3344.62	1603.06	2410.52	2954.17	347.598	2.78025	0.103928	1.50869	0.720717	1.47522	-3.26635	0.593294	-0.472496	0.23		hypothetical protein	1694	2507	2148	866	3971	213	564
FORC35_2061	1245.08	3980.99	1912.03	3014.55	3304.57	504.262	2.65409	0.126667	1.53567	0.757235	1.40822	-2.98088	0.618865	-0.401187	0.251	M	hypothetical protein	1985	2984	2562	1083	4442	309	562
FORC35_2062	683.072	1914.45	1073.93	1806.5	1542.18	262.738	2.25772	0.13724	1.57221	0.943613	1.17486	-2.86523	0.652796	-0.0837328	0.336		hypothetical protein	1089	1435	1439	649	2073	161	560
FORC35_2063	2010.33	7796.55	3732.27	5361.05	7835.89	744.154	3.89782	0.0954465	1.85655	0.687618	1.96267	-3.38916	0.892626	-0.540321	0.115	M	UDP-glucose 4-epimerase	3205	5844	5001	1926	10533	456	558
FORC35_2064	0	0	0	0	0.7439	0	-	-	-	-	-	-	-	-	1		hypothetical protein	0	0	0	0	1	0	556
FORC35_2065	23402.6	50262.7	41728.2	58760	64441.3	8094.3	2.7536	0.16104	1.78306	1.16906	1.46132	-2.63451	0.834355	0.225347	0.234	G	6-phosphogluconate dehydrogenase, decarboxylating	37310	37675	55913	21110	86622	4960	554
FORC35_2066	5896.12	3743.52	2238.92	2068.15	5257.4	1378.97	0.891672	0.368362	0.379727	0.552462	-0.165416	-1.44081	-1.39696	-0.856053	0.891	M	UDP-glucose 6-dehydrogenase	9400	2806	3000	743	7067	845	552
FORC35_2067	1401.27	780.456	733.618	445.362	669.543	908.977	0.477812	1.16467	0.523539	0.570644	-1.06548	0.219927	-0.933632	-0.809337	0.382	M	chain-length determining protein	2234	585	983	160	900	557	550
FORC35_2068	5745.58	5457.85	3033.73	2716.71	30100.4	435.721	5.23888	0.0798339	0.528012	0.497762	2.38926	-3.64686	-0.921359	-1.00647	0.059	E	phosphoribosyl-AMP cyclohydrolase	9160	4091	4065	976	40461	267	532
FORC35_2070	1631.47	2087.89	1491.86	2513.51	2748.85	1018.32	1.68489	0.487726	0.914431	1.20386	0.752655	-1.03586	-0.129054	0.267663	0.534	M	mannose-1-phosphate guanylyltransferase	2601	1565	1999	903	3695	624	548
FORC35_2071	2901.02	5304.43	4074.83	5803.63	8608.84	1108.07	2.96753	0.208895	1.40462	1.09411	1.56926	-2.25915	0.490181	0.129757	0.202	G	phosphomannomutase	4625	3976	5460	2085	11572	679	546
FORC35_2072	1401.9	2378.72	2121.75	2040.32	2963.84	515.685	2.11417	0.216791	1.51348	0.857736	1.08009	-2.20562	0.597873	-0.221394	0.375	V	hypothetical protein	2235	1783	2843	733	3984	316	544
FORC35_2073	5285.81	7695.16	6482.41	8595.49	9367.65	3283.41	1.77223	0.426686	1.22638	1.117	0.825564	-1.22875	0.294406	0.159629	0.496	G	sugar ABC transporter ATP-binding protein	8427	5768	8686	3088	12592	2012	542
FORC35_2074	4602.11	5783.38	5700.28	5962.29	7856.72	2501.73	1.7072	0.432572	1.23862	1.03094	0.771632	-1.20899	0.308738	0.0439541	0.524	H	SAM-dependent methyltransferase	7337	4335	7638	2142	10561	1533	540
FORC35_2075	16664.1	24881.2	21122.7	25973	31441	10638.5	1.88676	0.42757	1.26756	1.04388	0.915907	-1.22577	0.342053	0.0619555	0.45	M	glycosyl transferases group 1 family protein	26567	18650	28303	9331	42263	6519	538
FORC35_2076	3108.63	3602.1	4160.65	3654.75	5107.13	1086.86	1.64288	0.301728	1.33842	1.01462	0.716231	-1.72868	0.420529	0.0209351	0.554	M	mannosyltransferase	4956	2700	5575	1313	6865	666	536
FORC35_2077	2074.3	2099.89	2509.08	2430.01	3963.7	809.43	1.91086	0.385463	1.2096	1.15721	0.934218	-1.37534	0.27453	0.210646	0.442	M	hypothetical protein	3307	1574	3362	873	5328	496	534
FORC35_2079	4494.22	4401.24	2358.33	1903.92	21991.5	372.077	4.89329	0.0845392	0.524746	0.432588	2.2908	-3.56424	-0.930309	-1.20893	0.069	E	imidazole glycerol phosphate synthase	7165	3299	3160	684	29561	228	530
FORC35_2080	4265.9	3795.55	2223.24	1745.26	24563.3	311.696	5.75805	0.0821214	0.521166	0.459818	2.52558	-3.6061	-0.940185	-1.12086	0.047	E	1-(5-phosphoribosyl)-5-[(5-phosphoribosylamino)m ethylideneamino] imidazole-4-carboxamide isomerase	6801	2845	2979	627	33018	191	528
FORC35_2081	3792.96	3428.67	2194.14	1734.13	22089	329.647	5.82368	0.0961443	0.578476	0.505773	2.54193	-3.37865	-0.78967	-0.983437	0.046	E	imidazole glycerol phosphate synthase	6047	2570	2940	623	29692	202	526
FORC35_2082	8648.48	8476.95	5958.5	4061.15	51842.7	771.896	5.99443	0.0910582	0.688966	0.479081	2.58362	-3.45707	-0.537496	-1.06166	0.042	E	imidazoleglycerol-phosphate dehydratase	13788	6354	7984	1459	69687	473	524
FORC35_2083	6874.62	7360.3	6223.44	4055.58	49729.9	551.587	7.23384	0.0749409	0.905278	0.551008	2.85476	-3.7381	-0.143568	-0.859856	0.026	E	histidinol-phosphate aminotransferase	10960	5517	8339	1457	66847	338	522
FORC35_2084	7006.97	12157.8	8131	4219.81	41197.7	714.779	5.87953	0.058792	1.16042	0.347087	2.5557	-4.08824	0.214642	-1.52663	0.044	E	histidinol dehydrogenase	11171	9113	10895	1516	55378	438	520
FORC35_2085	8007.43	13569.3	11863.3	3278.98	24965	527.109	3.11773	0.0388458	1.48153	0.241648	1.6405	-4.6861	0.567091	-2.04902	0.183	E	ATP phosphoribosyltransferase	12766	10171	15896	1178	33558	323	518
FORC35_2086	7432.87	4976.24	6048.81	5970.64	5446.36	7523.13	0.73274	1.51181	0.813791	1.19983	-0.448627	0.596278	-0.297269	0.26283	0.71	M	hypothetical protein	11850	3730	8105	2145	7321	4610	516
FORC35_2087	1499.75	1202.04	1747.1	2432.79	1461.84	3675.07	0.974722	3.05738	1.16493	2.02389	-0.0369375	1.61229	0.220244	1.01713	0.976	K	LysR family transcripitonal regulator	2391	901	2341	874	1965	2252	514
FORC35_2089	699.38	2984.41	2454.6	617.94	3495.76	251.315	4.99837	0.0842093	3.50968	0.207056	2.32146	-3.56988	1.81134	-2.27191	0.066	E	putrescine/spermidine ABC transporter	1115	2237	3289	222	4699	154	512
FORC35_2090	4881.86	1206.04	1132.89	1266.5	1792.14	2118.23	0.367103	1.75635	0.232061	1.05013	-1.44574	0.812582	-2.10742	0.0705713	0.239	S	membrane protein	7783	904	1518	455	2409	1298	510
FORC35_2091	2527.8	564.33	744.067	793.302	1332.39	693.564	0.527094	1.22901	0.294353	1.40574	-0.923867	0.297491	-1.76438	0.491332	0.447	O	sirA-like family protein	4030	423	997	285	1791	425	508
FORC35_2092	1346.07	2337.36	1755.31	1695.16	3122.3	1124.39	2.31957	0.48105	1.30403	0.725244	1.21386	-1.05574	0.382972	-0.463461	0.32	L	exonuclease I	2146	1752	2352	609	4197	689	506
FORC35_2093	307.351	309.514	298.522	144.743	208.302	334.543	0.677734	1.08086	0.971275	0.467645	-0.561208	0.112186	-0.0420485	-1.09651	0.646	M	D-alanyl-D-alanine carboxypeptidase	490	232	400	52	280	205	504
FORC35_2094	1925.65	1119.32	1480.67	4926.82	798.988	6023.4	0.414919	5.3813	0.768921	4.40162	-1.2691	2.42796	-0.379093	2.13803	0.3	K	DNA gyrase inhibitor	3070	839	1984	1770	1074	3691	502
FORC35_2095	1163.54	671.058	885.118	1046.6	545.306	1953.4	0.46866	2.91093	0.76071	1.55963	-1.09339	1.54148	-0.394582	0.641202	0.37	S	membrane protein	1855	503	1186	376	733	1197	500
FORC35_2096	11.2904	25.3481	8.9557	5.567	0.7439	11.4234	0.0658878	0.450661	0.793214	0.219622	-3.92384	-1.14989	-0.334218	-2.18691	0.039		hypothetical protein	18	19	12	2	1	7	498
FORC35_2097	5038.67	9218.72	10040.8	3535.06	8745.72	2850.96	1.73572	0.309257	1.99275	0.383466	0.795534	-1.69312	0.994758	-1.38283	0.511	S	hypothetical protein	8033	6910	13454	1270	11756	1747	496
FORC35_2099	18.8174	4.0023	14.9261	2.7835	9.6712	16.3192	0.51395	4.07746	0.793207	0.695475	-0.9603	2.02767	-0.33423	-0.523929	0.479		hypothetical protein	30	3	20	1	13	10	494
FORC35_2100	23.8354	13.3411	21.6429	13.9176	15.6227	16.3192	0.655441	1.22323	0.908015	1.04321	-0.609462	0.290693	-0.139212	0.0610328	0.663		toxin	38	10	29	5	21	10	492
FORC35_2102	19.4447	14.6752	17.165	19.4846	17.1106	21.2149	0.879962	1.44563	0.88276	1.32772	-0.184487	0.531698	-0.179907	0.408954	0.932		hypothetical protein	31	11	23	7	23	13	488
FORC35_2103	63.3519	73.3762	69.4064	69.5879	63.9786	76.7	1.00989	1.0453	1.09557	0.948372	0.0142015	0.0639144	0.131681	-0.0764757	1	L	hypothetical protein	101	55	93	25	86	47	486
FORC35_2104	46.4163	62.7033	65.6749	58.4538	63.9786	68.5405	1.37836	1.09309	1.41491	0.932228	0.462958	0.128415	0.500711	-0.101245	0.715		hypothetical protein	74	47	88	21	86	42	484
FORC35_2105	19.4447	24.014	37.3153	11.1341	16.3666	14.6872	0.8417	0.61161	1.91905	0.46365	-0.248622	-0.709316	0.94039	-1.10889	0.896		hypothetical protein	31	18	50	4	22	9	482
FORC35_2106	4.3907	4.0023	4.4778	5.567	2.2318	8.1596	0.508302	2.03873	1.01984	1.39095	-0.976243	1.02767	0.0283391	0.476071	0.682		hypothetical protein	7	3	6	2	3	5	480
FORC35_2108	279.752	493.622	449.276	423.094	281.952	246.419	1.00786	0.499207	1.60598	0.857123	0.0113016	-1.00229	0.683454	-0.222426	0.995		hypothetical protein	446	370	602	152	379	151	478
FORC35_2109	563.895	568.332	663.466	428.661	422.556	628.288	0.749353	1.10549	1.17658	0.754245	-0.416283	0.144691	0.234596	-0.406896	0.733		membrane protein	899	426	889	154	568	385	476
FORC35_2112	1.2545	0	0.7463	0	0	0	0	-	0.594898	-	-	-	-0.749285	-	0.569		hypothetical protein	2	0	1	0	0	0	470
FORC35_2115	454.754	362.878	326.882	267.217	629.371	274.162	1.38398	0.75552	0.718811	0.736383	0.468824	-0.404459	-0.476316	-0.441473	0.7	L	transposase IS30	725	272	438	96	846	168	462
FORC35_2116	43.28	6.6706	4.4778	0	2.9758	4.8958	0.0687569	0.733937	0.103461	0	-3.86235	-0.446272	-3.27284	-	0.009		hypothetical protein	69	5	6	0	4	3	458
FORC35_2119	81.5421	80.0467	79.8547	77.9384	74.3937	109.338	0.912335	1.36593	0.979306	0.973662	-0.132365	0.449885	-0.0301678	-0.0385076	0.926	H	cobalamin synthase	130	60	107	28	100	67	448
FORC35_2120	279.125	302.844	221.653	361.857	223.925	450.409	0.80224	1.48727	0.794099	1.19486	-0.317895	0.572662	-0.332609	0.256847	0.795	H	nicotinate-nucleotide--dimethylbenzimidazole phosphoribosyltransferase	445	227	297	130	301	276	446
FORC35_2121	3796.1	4213.13	5453.26	6454.97	3079.15	9608.72	0.811137	2.28066	1.43654	1.53211	-0.301982	1.18945	0.522601	0.615519	0.802	S	L,D-transpeptidase	6052	3158	7307	2319	4139	5888	444
FORC35_2122	0	1.3341	2.9852	0	1.4879	3.2638	-	2.44644	-	0	-	1.29069	-	-	0.569		hypothetical protein	0	1	4	0	2	2	440
FORC35_2123	373.839	328.192	882.88	623.507	481.327	1126.02	1.28753	3.43099	2.36166	1.89983	0.364601	1.77862	1.2398	0.925868	0.763	K	nitrogen assimilation regulatory protein nac	596	246	1183	224	647	690	438
FORC35_2124	5055.61	713.75	653.764	1163.51	1584.59	1006.89	0.313431	1.41071	0.129315	1.63014	-1.67378	0.496418	-2.95104	0.704992	0.175	K	CysB family transcriptional regulator	8060	535	876	418	2130	617	436
FORC35_2125	754.578	372.217	508.234	821.137	433.715	1351.23	0.574779	3.63021	0.673534	2.20607	-0.798921	1.86005	-0.570176	1.14148	0.511	V	MATE family multidrug exporter	1203	279	681	295	583	828	432
FORC35_2126	795.976	2110.57	1122.44	180.928	1614.34	155.032	2.02813	0.0734552	1.41015	0.0857251	1.02015	-3.76699	0.495846	-3.54414	0.402	K	hypothetical protein	1269	1582	1504	65	2170	95	428
FORC35_2127	12641.5	8677.07	6831.68	5750.74	6792.89	5233.55	0.537347	0.603148	0.540416	0.662752	-0.896074	-0.729416	-0.887858	-0.593459	0.46	F	AMP nucleosidase	20154	6504	9154	2066	9131	3207	426
FORC35_2128	3410.97	3896.94	2350.12	879.591	3133.46	762.105	0.918643	0.195565	0.688988	0.225713	-0.122423	-2.35428	-0.537449	-2.14744	0.919	G	shikimate transporter	5438	2921	3149	316	4212	467	424
FORC35_2129	160.575	44.0257	66.4212	33.4022	72.1619	35.9021	0.449397	0.815481	0.413646	0.758698	-1.15394	-0.294278	-1.27353	-0.398403	0.355	M	hypothetical protein	256	33	89	12	97	22	422
FORC35_2130	90.3235	34.6869	56.7192	22.2681	73.6498	39.166	0.8154	1.12913	0.627956	0.641974	-0.29442	0.175211	-0.671264	-0.639412	0.82		autotransporter	144	26	76	8	99	24	420
FORC35_2131	810.403	777.787	832.877	1027.12	610.028	1548.69	0.752747	1.99115	1.02773	1.32056	-0.409763	0.993599	0.0394645	0.401152	0.735	R	hypothetical protein	1292	583	1116	369	820	949	418
FORC35_2132	0	0	0	0	0.7439	1.6319	-	-	-	-	-	-	-	-	1		hypothetical protein	0	0	0	0	1	1	416
FORC35_2133	29.4806	36.021	23.1355	8.3505	8.1833	8.1596	0.277583	0.226523	0.78477	0.231823	-1.84901	-2.14227	-0.349658	-2.1089	0.181		hypothetical protein	47	27	31	3	11	5	414
FORC35_2134	604.038	40231.5	639.584	15417.9	2277.19	1103.17	3.76994	0.0274207	1.05885	0.383229	1.91454	-5.18859	0.0824931	-1.38372	0.124	P	TonB-dependent receptor	963	30156	857	5539	3061	676	412
FORC35_2135	272.852	6003.5	429.872	3638.05	253.683	545.06	0.929743	0.0907903	1.57548	0.605988	-0.105096	-3.46132	0.655787	-0.722638	0.933	Q	2,3-dihydroxybenzoate-AMP ligase of siderophore biosynthesis	435	4500	576	1307	341	334	410
FORC35_2136	80.9148	2115.9	114.185	1414.03	82.577	156.664	1.02054	0.0740412	1.41117	0.668285	0.0293364	-3.75553	0.496895	-0.581465	0.984	Q	Yersiniabactin synthetase, thioesterase component	129	1586	153	508	111	96	408
FORC35_2137	89.6963	1619.61	152.993	1216.4	85.5527	161.56	0.953804	0.099752	1.70567	0.751041	-0.0682351	-3.32551	0.770342	-0.413036	0.963	Q	Thiazolinyl imide reductase in siderophore biosynthesis gene cluster	143	1214	205	437	115	99	406
FORC35_2138	1250.73	35563.4	1820.24	18730.3	1337.6	2132.91	1.06945	0.0599749	1.45534	0.526672	0.096875	-4.0595	0.541358	-0.925023	0.936	Q	Iron aquisition yersiniabactin synthesis enzyme	1994	26657	2439	6729	1798	1307	404
FORC35_2139	1139.71	60341.9	1824.72	24038.4	2054.01	2031.73	1.80223	0.0336704	1.60104	0.39837	0.84978	-4.89238	0.67901	-1.32782	0.484	Q	Siderophore biosynthesis non-ribosomal peptide synthetase modules	1817	45230	2445	8636	2761	1245	402
FORC35_2140	6206.61	14887.4	12394.6	737.631	8500.97	308.432	1.36966	0.0207177	1.99701	0.0495475	0.453822	-5.59299	0.99784	-4.33504	0.707	K	Iron aquisition regulator	9895	11159	16608	265	11427	189	400
FORC35_2141	223.927	10375.4	269.416	6235.07	429.252	731.098	1.91693	0.0704646	1.20314	0.600948	0.938794	-3.82696	0.266808	-0.734687	0.443	V	yersiniabactin ABC transporter ATP-binding protein/permease	357	7777	361	2240	577	448	398
FORC35_2142	291.67	11433.3	341.808	11237	594.406	1098.28	2.03794	0.0960593	1.1719	0.982831	1.02711	-3.37993	0.228851	-0.0249841	0.401	V	Inner membrane ABC-transporter YbtQ	465	8570	458	4037	799	673	396
FORC35_2143	70.8789	3321.94	144.783	3067.43	200.119	297.009	2.82339	0.0894082	2.04269	0.923386	1.49743	-3.48345	1.03047	-0.114994	0.231	G	AmpG permease	113	2490	194	1102	269	182	394
FORC35_2144	420.882	16425.6	765.71	21591.7	869.662	1197.83	2.06628	0.0729244	1.8193	1.31452	1.04704	-3.77745	0.86338	0.394533	0.391	E	Anthranilate synthase	671	12312	1026	7757	1169	734	392
FORC35_2148	32.6168	22.6799	30.5985	13.9176	34.965	17.9511	1.07199	0.791498	0.938121	0.613653	0.100296	-0.337342	-0.0921543	-0.704504	0.963		integrase	52	17	41	5	47	11	386
FORC35_2149	2256.83	2158.59	2019.5	5703.42	1553.34	4825.57	0.688283	2.23552	0.894839	2.64219	-0.538926	1.16061	-0.1603	1.40174	0.656	S	DgsA anti-repressor MtfA	3598	1618	2706	2049	2088	2957	382
FORC35_2150	845.529	152.089	164.934	94.6395	182.264	246.419	0.215563	1.62023	0.195066	0.622265	-2.21382	0.696201	-2.35797	-0.6844	0.079	L	integrase	1348	114	221	34	245	151	378
FORC35_2151	105.377	18.6776	15.6724	11.1341	10.4151	45.6936	0.0988362	2.44644	0.148726	0.59612	-3.33882	1.29068	-2.74927	-0.746324	0.015		hypothetical protein	168	14	21	4	14	28	376
FORC35_2152	569.54	169.432	217.921	153.093	225.413	256.211	0.395781	1.51217	0.382627	0.903567	-1.33723	0.596623	-1.38599	-0.146297	0.277	L	phage exonuclease VIII, 5' - 3' specific dsDNA e xonuclease	908	127	292	55	303	157	374
FORC35_2153	11.2904	0	0.7463	0	1.4879	1.6319	0.131785	-	0.0661004	-	-2.92375	-	-3.9192	-	0.081		hypothetical protein	18	0	1	0	2	1	372
FORC35_2154	9.4087	2.6682	1.4926	0	0.7439	0	0.0790651	0	0.15864	0	-3.66081	-	-2.65617	-	0.061		regulatory protein	15	2	2	0	1	0	370
FORC35_2156	3.7635	2.6682	2.2389	2.7835	2.2318	3.2638	0.593012	1.22322	0.594898	1.04321	-0.753867	0.290686	-0.749285	0.0610333	0.682		hypothetical protein	6	2	3	1	3	2	368
FORC35_2157	40.1438	29.3505	29.1059	8.3505	35.709	16.3192	0.889527	0.556011	0.725041	0.28451	-0.168889	-0.846815	-0.463866	-1.81345	0.9		phage protein	64	22	39	3	48	10	366
FORC35_2158	0	0	2.2389	0	0	0	-	-	-	-	-	-	-	-	1		hypothetical protein	0	0	3	0	0	0	364
FORC35_2162	171.238	176.103	207.473	244.949	177.801	262.738	1.03832	1.49196	1.2116	1.39094	0.0542572	0.577209	0.276918	0.476065	0.97		Rha family transcriptional regulator	273	132	278	88	239	161	360
FORC35_2163	381.366	334.862	304.493	523.301	372.712	582.594	0.977309	1.7398	0.798426	1.56273	-0.0331134	0.798923	-0.324769	0.644073	0.981		hypothetical protein	608	251	408	188	501	357	358
FORC35_2164	56.4522	65.3715	29.1059	80.7219	30.5014	53.8532	0.540305	0.823802	0.515585	1.23482	-0.888154	-0.27963	-0.955718	0.304298	0.49		hypothetical protein	90	49	39	29	41	33	356
FORC35_2167	151.794	258.818	252.251	192.062	264.098	161.56	1.73985	0.624221	1.6618	0.742076	0.798959	-0.67987	0.73275	-0.430361	0.513		phage protein	242	194	338	69	355	99	354
FORC35_2168	10.036	10.6729	14.9261	19.4846	17.8545	13.0553	1.77905	1.22322	1.48726	1.82561	0.831103	0.290683	0.572653	0.868382	0.581	L	endodeoxyribonuclease	16	8	20	7	24	8	352
FORC35_2169	115.413	101.392	155.232	158.66	100.431	184.406	0.870189	1.81874	1.345	1.56481	-0.200599	0.862939	0.427612	0.64599	0.874	O	antitermination protein	184	76	208	57	135	113	350
FORC35_2171	2199.13	2091.89	2084.43	1188.56	781.878	4074.89	0.35554	1.94795	0.947845	0.568176	-1.49192	0.961957	-0.0772768	-0.81559	0.225		hypothetical protein	3506	1568	2793	427	1051	2497	844
FORC35_2172	10.6632	5.3365	0.7463	0	6.6954	0	0.627898	0	0.0699884	0	-0.671398	-	-3.83674	-	0.677		hypothetical protein	17	4	1	0	9	0	344
FORC35_2173	192.565	66.7056	26.867	25.0516	35.709	60.3809	0.185439	0.905185	0.139522	0.375555	-2.43098	-0.143716	-2.84144	-1.41291	0.059		anti-adapter protein iraM	307	50	36	9	48	37	342
FORC35_2174	9.4087	12.007	5.9704	5.567	17.1106	8.1596	1.81859	0.67957	0.634562	0.463646	0.862823	-0.557305	-0.656168	-1.1089	0.563		hypothetical protein	15	9	8	2	23	5	340
FORC35_2175	3.1362	2.6682	5.2241	2.7835	1.4879	3.2638	0.474428	1.22322	1.66574	1.04321	-1.07574	0.290686	0.736165	0.0610333	0.617		hypothetical protein	5	2	7	1	2	2	338
FORC35_2176	11.2904	2.6682	5.9704	0	6.6954	8.1596	0.593017	3.05809	0.528803	0	-0.753854	1.61263	-0.919197	-	0.628		holin	18	2	8	0	9	5	336
FORC35_2177	40.771	33.3528	37.3153	19.4846	14.1348	26.1107	0.346688	0.782864	0.915241	0.584197	-1.52829	-0.353167	-0.127776	-0.775474	0.251		hypothetical protein	65	25	50	7	19	16	334
FORC35_2178	33.2441	24.014	12.6872	5.567	22.3181	22.8468	0.67134	0.951395	0.381638	0.231823	-0.574884	-0.0718836	-1.38972	-2.1089	0.67	R	lysozyme	53	18	17	2	30	14	332
FORC35_2179	116.668	49.3622	55.2266	27.8351	39.4287	73.4362	0.337957	1.4877	0.473366	0.563895	-1.56509	0.573085	-1.07897	-0.826501	0.217		endopeptidase	186	37	74	10	53	45	330
FORC35_2180	512.461	1198.03	126.126	38.9692	1510.19	53.8532	2.94694	0.0449514	0.246118	0.0325277	1.55922	-4.47549	-2.02258	-4.94219	0.206		hypothetical protein	817	898	169	14	2030	33	328
FORC35_2181	28.8534	22.6799	32.8375	8.3505	34.2211	8.1596	1.18603	0.359772	1.13808	0.368189	0.246145	-1.47484	0.186603	-1.44148	0.86	V	DNAse	46	17	44	3	46	5	1982
FORC35_2182	18.1902	12.007	11.1946	5.567	10.4151	17.9511	0.572567	1.49505	0.615419	0.463646	-0.804485	0.580197	-0.700358	-1.1089	0.552	L	terminase	29	9	15	2	14	11	326
FORC35_2183	187.547	133.411	182.845	169.794	112.335	252.947	0.598968	1.89599	0.974929	1.27271	-0.73945	0.922955	-0.0366303	0.347909	0.544	R	terminase	299	100	245	61	151	155	324
FORC35_2184	8.7815	5.3365	5.2241	2.7835	5.9515	3.2638	0.677732	0.611599	0.594898	0.521597	-0.561214	-0.709341	-0.749285	-0.938994	0.772		hypothetical protein	14	4	7	1	8	2	322
FORC35_2185	282.888	217.46	257.475	231.032	168.13	300.272	0.594333	1.38082	0.910167	1.06241	-0.750657	0.46552	-0.135797	0.0873388	0.539	R	hypothetical protein	451	163	345	83	226	184	320
FORC35_2186	191.938	185.442	177.621	219.898	138.372	221.94	0.720924	1.19682	0.925409	1.18581	-0.472081	0.259208	-0.111837	0.245867	0.703	R	peptidase	306	139	238	79	186	136	318
FORC35_2187	408.338	518.97	523.907	723.714	474.632	378.604	1.16235	0.729531	1.28302	1.39452	0.217046	-0.454959	0.359547	0.479769	0.859	R	phage capsid protein	651	389	702	260	638	232	316
FORC35_2188	10.6632	17.3435	14.9261	19.4846	19.3424	37.5341	1.81394	2.16416	1.39978	1.12345	0.859126	1.11381	0.485197	0.167939	0.569		hypothetical protein	17	13	20	7	26	23	314
FORC35_2192	11.9177	24.014	28.3596	36.1857	15.6227	26.1107	1.31088	1.08731	2.37962	1.50686	0.390538	0.120765	1.25073	0.591544	0.78		hypothetical protein	19	18	38	13	21	16	308
FORC35_2193	126.077	146.752	165.68	222.681	112.335	239.892	0.891002	1.63467	1.31412	1.51739	-0.166499	0.709	0.394097	0.601597	0.892		hypothetical protein	201	110	222	80	151	147	306
FORC35_2194	45.1618	40.0234	64.1823	52.8868	39.4287	58.749	0.873054	1.46787	1.42116	1.3214	-0.195857	0.553721	0.507073	0.402064	0.895		tail assembly protein	72	30	86	19	53	36	304
FORC35_2195	0	0	0.7463	0	0.7439	1.6319	-	-	-	-	-	-	-	-	1		hypothetical protein	0	0	1	0	1	1	302
FORC35_2196	8.7815	16.0094	5.9704	2.7835	3.7197	3.2638	0.423584	0.203868	0.679884	0.173867	-1.23928	-2.29429	-0.55664	-2.52395	0.408		phage tail protein	14	12	8	1	5	2	300
FORC35_2197	461.654	494.956	463.456	439.795	470.912	701.724	1.02006	1.41775	1.0039	0.888555	0.0286471	0.503604	0.00562133	-0.170467	0.983	S	hypothetical protein	736	371	621	158	633	430	298
FORC35_2198	74.0151	105.395	92.5419	77.9384	78.8573	137.081	1.06542	1.30064	1.25031	0.739489	0.0914247	0.379223	0.322287	-0.435399	0.949	S	hypothetical protein	118	79	124	28	106	84	296
FORC35_2201	18.8174	37.3551	26.1207	13.9176	16.3666	19.583	0.869759	0.524239	1.38811	0.372576	-0.201313	-0.931703	0.473126	-1.42439	0.896	R	hypothetical protein	30	28	35	5	22	12	290
FORC35_2202	31.9896	34.6869	32.0911	22.2681	19.3424	17.9511	0.604647	0.517518	1.00317	0.641974	-0.725836	-0.950319	0.00457029	-0.639412	0.575	S	hypothetical protein	51	26	43	8	26	11	288
FORC35_2207	482.98	361.544	405.99	289.486	316.917	791.479	0.65617	2.18916	0.840594	0.800691	-0.607858	1.13038	-0.250518	-0.320682	0.617		short-chain fatty acid transporter	770	271	544	104	426	485	278
FORC35_2208	131.722	62.7033	73.138	83.5054	89.2724	171.351	0.677734	2.73273	0.555246	1.33175	-0.561208	1.45034	-0.848801	0.413328	0.652	R	tail assembly protein	210	47	98	30	120	105	276
FORC35_2209	15452.2	8130.08	5793.57	6933.73	12382.8	9285.6	0.801362	1.14213	0.374934	0.85285	-0.319473	0.191726	-1.41529	-0.229637	0.791	V	hypothetical protein	24635	6094	7763	2491	16645	5690	274
FORC35_2210	3078.53	1343.45	1035.87	640.208	1672.37	1295.74	0.543237	0.964487	0.336483	0.47654	-0.880346	-0.0521663	-1.57139	-1.06933	0.468	V	restriction endonuclease	4908	1007	1388	230	2248	794	272
FORC35_2212	40.771	9.3388	8.9557	2.7835	5.2076	1.6319	0.127728	0.174744	0.219659	0.298058	-2.96885	-2.51668	-2.18667	-1.74634	0.041	S	hypothetical protein	65	7	12	1	7	1	268
FORC35_2213	3866.35	2334.7	2468.03	1071.65	1974.41	2788.94	0.510665	1.19456	0.638337	0.459012	-0.969551	0.256484	-0.64761	-1.1234	0.425	K	MerR family transcriptional regulator	6164	1750	3307	385	2654	1709	266
FORC35_2214	1114.62	262.82	272.401	133.609	201.607	372.077	0.180875	1.41571	0.24439	0.508366	-2.46693	0.501525	-2.03274	-0.976062	0.052	T	diguanylate phosphodiesterase	1777	197	365	48	271	228	264
FORC35_2217	67.7426	25.3481	31.3448	16.7011	11.1591	345.966	0.164728	13.6486	0.462704	0.65887	-2.60184	3.77068	-1.11184	-0.601934	0.051		two-component-system connector protein AriR	108	19	42	6	15	212	262
FORC35_2218	95.9687	21.3458	12.6872	11.1341	18.5984	306.8	0.193797	14.3729	0.132201	0.521606	-2.36739	3.84527	-2.91919	-0.938967	0.069		hypothetical protein	153	16	17	4	25	188	260
FORC35_2219	1168.56	301.509	405.244	370.207	312.454	1343.07	0.267383	4.45448	0.346789	1.22785	-1.90302	2.15526	-1.52787	0.296131	0.126	T	hypothetical protein	1863	226	543	133	420	823	258
FORC35_2220	80.2876	32.0187	57.4655	22.2681	116.798	21.2149	1.45475	0.662578	0.715746	0.695472	0.540768	-0.593837	-0.482481	-0.523936	0.667		membrane protein	128	24	77	8	157	13	256
FORC35_2222	1629.59	397.565	299.269	320.104	432.227	393.292	0.265237	0.98925	0.183647	0.805161	-1.91464	-0.0155925	-2.44499	-0.312651	0.124	M	autotransporter	2598	298	401	115	581	241	254
FORC35_2223	322.405	158.759	173.889	102.99	183.008	132.185	0.567636	0.832613	0.539351	0.648717	-0.816963	-0.264281	-0.890705	-0.624338	0.504		hypothetical protein	514	119	233	37	246	81	252
FORC35_2224	122.313	73.3762	58.9581	16.7011	85.5527	8.1596	0.699457	0.111202	0.482026	0.227609	-0.515694	-3.16874	-1.05282	-2.13537	0.677		hypothetical protein	195	55	79	6	115	5	250
FORC35_2225	1.2545	2.6682	2.9852	2.7835	0.7439	0	0.592985	0	2.37959	1.04321	-0.753932	-	1.25072	0.0610333	1		ATPase	2	2	4	1	1	0	248
FORC35_2226	1474.66	2842.99	2124.73	2257.43	3384.17	739.258	2.29489	0.260028	1.44083	0.794033	1.19842	-1.94326	0.526902	-0.332729	0.326	D	cell division topological specificity factor Min E	2351	2131	2847	811	4549	453	246
FORC35_2227	7675.62	12880.9	9423.6	10059.6	15332.5	4838.63	1.99756	0.375645	1.22773	0.780975	0.998242	-1.41256	0.295996	-0.356652	0.411	D	cell division inhibitor MinD	12237	9655	12627	3614	20610	2965	244
FORC35_2228	3762.23	3423.33	3051.64	1519.8	3750.93	1695.56	0.996998	0.495295	0.811127	0.443953	-0.0043381	-1.01364	-0.302	-1.17152	0.997	D	septum formation inhibitor	5998	2566	4089	546	5042	1039	242
FORC35_2229	1086.39	792.463	704.513	695.879	755.096	297.009	0.69505	0.374792	0.648489	0.878122	-0.524812	-1.41584	-0.624846	-0.187507	0.665		hypothetical protein	1732	594	944	250	1015	182	240
FORC35_2230	2705.31	2770.95	2953.88	2449.49	3141.65	1357.75	1.16129	0.489996	1.09188	0.88399	0.215724	-1.02916	0.126814	-0.177898	0.858		hypothetical protein	4313	2077	3958	880	4223	832	238
FORC35_2231	26.3444	8.0047	8.9557	2.7835	8.9272	14.6872	0.338865	1.83482	0.339947	0.347733	-1.56122	0.87564	-1.55662	-1.52395	0.249		hypothetical protein	42	6	12	1	12	9	236
FORC35_2232	1087.02	768.449	667.197	272.784	595.149	375.341	0.547506	0.488439	0.613786	0.354981	-0.869052	-1.03375	-0.704191	-1.49419	0.475	S	hypothetical protein	1733	576	894	98	800	230	234
FORC35_2233	5168.51	3133.83	2864.32	1734.13	2372.41	1938.72	0.459013	0.618641	0.554187	0.553358	-1.12339	-0.692825	-0.851556	-0.853715	0.357	Q	hypothetical protein	8240	2349	3838	623	3189	1188	232
FORC35_2234	1115.24	689.736	821.683	1324.95	711.948	1158.66	0.638378	1.67986	0.736773	1.92096	-0.647517	0.748341	-0.440707	0.941825	0.593	S	hypothetical protein	1778	517	1101	476	957	710	230
FORC35_2235	835.492	166.764	230.608	1611.65	232.108	644.607	0.27781	3.86538	0.276015	9.66428	-1.84783	1.95061	-1.85718	3.27266	0.138		hemolysin activation protein	1332	125	309	579	312	395	228
FORC35_2236	0.6273	0	0	0	0	0	0	-	0	-	-	-	-	-	1		hypothetical protein	1	0	0	0	0	0	226
[truncated: 2,747 more rows]
